# Supplementary material for: Entrainment and suspension of sand and gravel
Source: Copernicus journal article supplement (doi:10.5194/esurf-2019-67), 2019-12-17
Supplement: Supplementary file 1 [file Table_S2.xlsx]

## Sheet: Rouse_1parameter
Least squares fit													York fit
ranking	rsquared	fitpar_A	parameter	coeff_p1	exp_p1								ranking	rsquared	fitpar_A	parameter	coeff_p1	exp_p1
1	0.325225	953.849	u*/ws	0.991438	-0.452585								1	0.324708	953.096	u*/ws	1.00768	-0.453869
2	0.225108	1103.05	u*_sk/ws	0.717526	-0.371876								2	0.224748	1102.53	u*_sk/ws	0.728878	-0.375469
3	0.203832	1135.87	di	80.161	0.578954								3	0.203469	1135.35	di	86.6075	0.586379
4	0.117863	1265.98	Rep (u*_sk D)	0.254418	0.371526								4	0.107383	1260.56	tau	0.565697	-0.243946
5	0.107949	1261.38	tau	0.555004	-0.230339								5	0.117585	1265.57	Rep (u*_sk D)	0.256371	0.373193
6	0.075765	1317.48	Cf	0.155357	-0.192781								6	0.075417	1316.98	Cf	0.147903	-0.202762
7	0.075765	1317.49	h/Kc	0.35132	0.0642481								7	0.0754141	1316.98	h/Kc	0.34887	0.0676032
8	0.0403172	1373.75	tau_sk	0.441189	-0.152546								8	0.0400315	1373.33	tau_sk	0.442792	-0.16227
9	0.0363631	1388.62	Rep (u*D)	0.317942	0.178239								9	0.0362052	1388.39	Rep (u*D)	0.321959	0.175942
10	0.0176889	1411.24	Cref/S	0.495875	0.0461322								10	0.0174837	1410.95	Cref/S	0.501525	0.0496264
11	0.0122067	1421.71	Fr	0.558259	0.0976996								11	0.0120492	1421.48	Fr	0.565441	0.100475
12	0.00394887	1432.74	S	0.357714	-0.027605								12	0.00376162	1432.46	S	0.34555	-0.0318986
13	0.00367159	1434.81	Cref	0.548277	0.0152784								13	0.00355603	1434.64	Cref	0.553243	0.0154952
14	0.00178123	1436.35	h/D50	0.388629	0.0175135								14	0.00156677	1436.04	h/D50	0.373441	0.022037
15	0.000165865	1439.42	Rep	0.468206	-0.00789066								15	0	1438.96	Rep	0.475598	-0.016712

## Sheet: Entrainment_1parameter
Least squares fit													York fit
ranking	rsquared	fitpar_A	parameter	coeff_p1	exp_p1								ranking	rsquared	fitpar_A	parameter	coeff_p1	exp_p1
1	0.614706	5411.16	u*_sk/ws	4.2334e-05	1.93659								1	0.614685	5410.84	u*_sk/ws	4.22398e-05	1.94423
2	0.507488	6971.15	di	3.06741e-15	-2.87888								2	0.507483	6971.07	di	3.11125e-15	-2.87782
3	0.467658	7958.87	Cref/S	0.00118459	0.747383								3	0.467229	7952.66	Cref/S	0.00115703	0.725172
4	0.458423	8042.22	Cref	0.141345	0.537644								4	0.449542	8004.19	tau_sk	0.000703729	1.56895
5	0.449868	8008.9	tau_sk	0.000699659	1.60605								5	0.457955	8035.51	Cref	0.122554	0.522627
6	0.430401	8116.43	Rep (u*D)	0.0247796	-1.93213								6	0.430346	8115.59	Rep (u*D)	0.0236001	-1.91103
7	0.393915	8643.27	Rep	0.00145036	-1.20625								7	0.393846	8642.29	Rep	0.00144355	-1.19309
8	0.331218	9525.18	u*/ws	3.65822e-05	1.43944								8	0.33097	9521.54	u*/ws	3.65134e-05	1.45709
9	0.286643	10219.4	Fr	0.00679637	1.49156								9	0.286355	10215.2	Fr	0.00695052	1.48589
10	0.213344	11197.3	Rep (u*_sk D)	0.00523236	-1.57506								10	0.213242	11195.8	Rep (u*_sk D)	0.00548605	-1.5941
11	0.120759	12539.7	Cf	5.23792e-06	-0.767006								11	0.120445	12535.1	Cf	4.78575e-06	-0.788069
12	0.120759	12539.7	h/Kc	0.00013459	0.25569								12	0.120445	12535.1	h/Kc	0.000134457	0.262676
13	0.098699	12965.7	S	0.0248975	0.434962								13	0.0980995	12957	S	0.0245698	0.428568
14	0.0914279	13035.1	h/D50	0.0227687	-0.395648								14	0.0909652	13028.4	h/D50	0.0235497	-0.394815
15	0.0752534	13352.5	tau	0.000255397	0.605975								15	0.0723529	13330.5	did50	0.0002993	-0.906105
16	0.0728093	13337.1	did50	0.000286878	-0.90741								16	0.0746098	13343.2	tau	0.000271633	0.586698

## Sheet: Entrainment_2parameter
Least squares fit													York fit
ranking	rsquared	A	parameter1	parameter2	coeff_p1	coeff_p2	exp_p1	exp_p2					ranking	rsquared	A	parameter1	parameter2	coeff_p1	coeff_p2	exp_p1	exp_p2
1	0.789603	2890.65	Fr	u*_sk/ws	0.00901148	0.052551	1.17953	1.7735					1	0.789591	2890.47	Fr	u*_sk/ws	0.0040753	0.113924	1.17368	1.78116
2	0.789603	2890.65	u*_sk/ws	Fr	0.00901148	0.052551	1.7735	1.17953					2	0.789591	2890.47	u*_sk/ws	Fr	0.0040753	0.113924	1.78116	1.17368
3	0.741503	3575.19	Fr	u*/ws	0.00182156	0.386532	1.80989	1.7109					3	0.741402	3573.73	u*/ws	Fr	0.00196151	0.347221	1.73254	1.80667
4	0.741503	3575.19	u*/ws	Fr	0.00182156	0.386532	1.7109	1.80989					4	0.741402	3573.73	Fr	u*/ws	0.00196151	0.347221	1.80667	1.73254
5	0.732815	3666.04	h/D50	u*_sk/ws	355.51	1.09866e-05	-0.450296	1.98087					5	0.732788	3665.65	h/D50	u*_sk/ws	0.353745	0.011275	-0.453477	1.99224
6	0.732815	3666.04	u*_sk/ws	h/D50	355.51	1.09866e-05	1.98087	-0.450296					6	0.732788	3665.65	u*_sk/ws	h/D50	0.353745	0.011275	1.99224	-0.453477
7	0.729928	3780.66	u*_sk/ws	u*/ws	3.1883e+20	4.806e-25	3.79851	-2.06769					7	0.72991	3780.39	u*_sk/ws	u*/ws	0.019961	0.00762761	3.77912	-2.05315
8	0.729928	3780.66	u*/ws	u*_sk/ws	3.1883e+20	4.806e-25	-2.06769	3.79851					8	0.72991	3780.39	u*/ws	u*_sk/ws	0.019961	0.00762761	-2.05315	3.77912
9	0.717615	3883.83	S	u*_sk/ws	0.0224885	0.124218	0.444153	1.94326					9	0.717552	3882.9	u*_sk/ws	S	0.013015	0.220586	1.95855	0.448074
10	0.717615	3883.83	u*_sk/ws	S	0.0224885	0.124218	1.94326	0.444153					10	0.717552	3882.9	S	u*_sk/ws	0.013015	0.220586	0.448074	1.95855
11	0.681182	4491.16	u*_sk/ws	did50	0.0192568	0.00190448	2.42151	1.08975					11	0.68112	4493.15	did50	u*_sk/ws	0.40652	8.97593e-05	1.12021	2.43992
12	0.681182	4491.16	did50	u*_sk/ws	0.0192568	0.00190448	1.08975	2.42151					12	0.68112	4493.15	u*_sk/ws	did50	0.40652	8.97593e-05	2.43992	1.12021
13	0.669092	4730.77	Rep (u*D)	tau_sk	1.21715	0.0111259	-1.45325	1.23291					13	0.66891	4728.05	Rep (u*D)	tau_sk	0.030562	0.435157	-1.45541	1.20432
14	0.669092	4730.77	tau_sk	Rep (u*D)	1.21715	0.0111259	1.23291	-1.45325					14	0.66891	4728.05	tau_sk	Rep (u*D)	0.030562	0.435157	1.20432	-1.45541
15	0.659184	4818.91	Fr	Rep (u*_sk D)	59.5262	0.00823239	1.91769	-2.14575					15	0.654787	4769.82	u*_sk/ws	tau_sk	0.300107	0.000288037	1.51515	0.645939
16	0.659184	4818.91	Rep (u*_sk D)	Fr	59.5262	0.00823239	-2.14575	1.91769					16	0.654787	4769.82	tau_sk	u*_sk/ws	0.300107	0.000288037	0.645939	1.51515
17	0.656169	4883.86	Rep	tau_sk	0.000139293	11.7313	-0.911344	1.2801					17	0.659112	4817.85	Fr	Rep (u*_sk D)	8.19616e-16	5.68954e+14	1.89786	-2.144
18	0.656169	4883.86	tau_sk	Rep	0.000139293	11.7313	1.2801	-0.911344					18	0.659112	4817.85	Rep (u*_sk D)	Fr	8.19616e-16	5.68954e+14	-2.144	1.89786
19	0.654867	4770.99	u*_sk/ws	tau_sk	0.356043	0.000246825	1.49648	0.642077					19	0.656066	4882.31	Rep	tau_sk	17.712	9.16611e-05	-0.917139	1.25532
20	0.654867	4770.99	tau_sk	u*_sk/ws	0.356043	0.000246825	0.642077	1.49648					20	0.656066	4882.31	tau_sk	Rep	17.712	9.16611e-05	1.25532	-0.917139
21	0.649543	4955.66	Rep	u*_sk/ws	4.3598e-08	2375.39	-0.453726	1.57957					21	0.649454	4954.35	Rep	u*_sk/ws	4.7114e-17	2.10888e+12	-0.430872	1.59496
22	0.649543	4955.66	u*_sk/ws	Rep	4.3598e-08	2375.39	1.57957	-0.453726					22	0.649454	4954.35	u*_sk/ws	Rep	4.7114e-17	2.10888e+12	1.59496	-0.430872
23	0.636693	5121.9	Cf	u*_sk/ws	6.04876e-25	1.14586e+19	-0.338998	1.83772					23	0.636664	5121.5	Cf	u*_sk/ws	1.98897e-37	3.71294e+31	-0.327128	1.84285
24	0.636693	5121.9	u*_sk/ws	Cf	6.04876e-25	1.14586e+19	1.83772	-0.338998					24	0.636664	5121.5	u*_sk/ws	Cf	1.98897e-37	3.71294e+31	1.84285	-0.327128
25	0.636693	5121.89	h/Kc	u*_sk/ws	0.000307986	0.0944946	0.112992	1.83775					25	0.636664	5121.5	h/Kc	u*_sk/ws	0.00137974	0.0213718	0.109044	1.84288
26	0.636693	5121.89	u*_sk/ws	h/Kc	0.000307986	0.0944946	1.83775	0.112992					26	0.636664	5121.5	u*_sk/ws	h/Kc	0.00137974	0.0213718	1.84288	0.109044
27	0.634297	5156.52	Rep (u*D)	u*_sk/ws	0.0016613	0.133422	-0.586416	1.58676					27	0.63424	5155.69	u*_sk/ws	Rep (u*D)	0.000964023	0.210091	1.60581	-0.554872
28	0.634297	5156.52	u*_sk/ws	Rep (u*D)	0.0016613	0.133422	1.58676	-0.586416					28	0.63424	5155.69	Rep (u*D)	u*_sk/ws	0.000964023	0.210091	-0.554872	1.60581
29	0.625652	5238.46	Rep (u*_sk D)	u*_sk/ws	0.00125177	0.0114898	0.490492	2.18039					29	0.625563	5237.2	Rep (u*_sk D)	u*_sk/ws	4.67917	2.8786e-06	0.519446	2.20574
30	0.625652	5238.46	u*_sk/ws	Rep (u*_sk D)	0.00125177	0.0114898	2.18039	0.490492					30	0.625563	5237.2	u*_sk/ws	Rep (u*_sk D)	4.67917	2.8786e-06	2.20574	0.519446
31	0.620847	5331.2	Rep (u*D)	S	10.7558	1.23975	-2.16179	0.613758					31	0.62081	5330.64	Rep (u*D)	S	0.880942	14.8285	-2.14914	0.61525
32	0.620847	5331.2	S	Rep (u*D)	10.7558	1.23975	0.613758	-2.16179					32	0.62081	5330.64	S	Rep (u*D)	0.880942	14.8285	0.61525	-2.14914
33	0.614902	5413.97	u*_sk/ws	tau	0.0945544	0.000452118	1.95028	-0.0332781					33	0.614687	5410.84	u*_sk/ws	tau	0.0943471	0.000447727	1.94427	-0.000144232
34	0.614902	5413.97	tau	u*_sk/ws	0.0945544	0.000452118	-0.0332781	1.95028					34	0.614687	5410.84	tau	u*_sk/ws	0.0943471	0.000447727	-0.000144232	1.94427
35	0.611845	5518.37	Fr	Rep (u*D)	0.0240793	4.99664	1.08154	-1.72088					35	0.613925	5491.97	Fr	Rep (u*D)	0.065994	2.14109	1.20173	-1.68906
36	0.611845	5518.37	Rep (u*D)	Fr	0.0240793	4.99664	-1.72088	1.08154					36	0.613925	5491.97	Rep (u*D)	Fr	0.065994	2.14109	-1.68906	1.20173
37	0.591492	5810.3	Rep (u*_sk D)	tau_sk	1.17391	0.00465832	-1.29474	1.48554					37	0.591207	5806.09	Rep (u*_sk D)	tau_sk	0.0258807	0.223988	-1.33946	1.45607
38	0.591492	5810.3	tau_sk	Rep (u*_sk D)	1.17391	0.00465832	1.48554	-1.29474					38	0.591207	5806.09	tau_sk	Rep (u*_sk D)	0.0258807	0.223988	1.45607	-1.33946
39	0.583587	5890.37	Rep	S	1.75416	0.319494	-1.361	0.613163					39	0.583549	5889.82	Rep	S	21.8677	0.0252745	-1.35087	0.612099
40	0.583587	5890.37	S	Rep	1.75416	0.319494	0.613163	-1.361					40	0.583549	5889.82	S	Rep	21.8677	0.0252745	0.612099	-1.35087
41	0.550353	6365.76	h/D50	Rep	0.124069	2.66216	-0.522827	-1.31535					41	0.550303	6365.03	h/D50	Rep	0.000186606	1743.28	-0.52258	-1.30189
42	0.550353	6365.76	Rep	h/D50	0.124069	2.66216	-1.31535	-0.522827					42	0.550303	6365.03	Rep	h/D50	0.000186606	1743.28	-1.30189	-0.52258
43	0.54501	6459.71	Fr	Rep	0.0095482	1.02034	1.11962	-1.01009					43	0.544968	6459.1	Fr	Rep	0.000394948	24.3541	1.11539	-1.00003
44	0.54501	6459.71	Rep	Fr	0.0095482	1.02034	-1.01009	1.11962					44	0.544968	6459.1	Rep	Fr	0.000394948	24.3541	-1.00003	1.11539
45	0.542552	6514.67	did50	Rep	2.86239e+07	3.48563e-11	-1.3168	-1.33789					45	0.540574	6459.11	Rep	tau	9.94882e-05	8.50118	-1.33307	0.877015
46	0.542552	6514.67	Rep	did50	2.86239e+07	3.48563e-11	-1.33789	-1.3168					46	0.540574	6459.11	tau	Rep	9.94882e-05	8.50118	0.877015	-1.33307
47	0.540659	6460.33	Rep	tau	2.39376e-29	3.54803e+25	-1.32937	0.857916					47	0.542486	6513.69	did50	Rep	1.06127e+09	9.22948e-13	-1.32681	-1.32422
48	0.540659	6460.33	tau	Rep	2.39376e-29	3.54803e+25	0.857916	-1.32937					48	0.542486	6513.69	Rep	did50	1.06127e+09	9.22948e-13	-1.32422	-1.32681
49	0.535682	6556.76	h/D50	Rep (u*D)	0.000194226	10238.6	-0.424803	-1.96403					49	0.535624	6555.88	h/D50	Rep (u*D)	0.69034	2.86035	-0.428353	-1.94776
50	0.535682	6556.76	Rep (u*D)	h/D50	0.000194226	10238.6	-1.96403	-0.424803					50	0.535624	6555.88	Rep (u*D)	h/D50	0.69034	2.86035	-1.94776	-0.428353
51	0.532524	6581.1	Rep (u*D)	tau	6395.6	2.56597e-06	-1.99608	0.707524					51	0.532451	6580.06	Rep (u*D)	tau	0.157074	0.102937	-1.99791	0.725677
52	0.532524	6581.1	tau	Rep (u*D)	6395.6	2.56597e-06	0.707524	-1.99608					52	0.532451	6580.06	tau	Rep (u*D)	0.157074	0.102937	0.725677	-1.99791
53	0.528652	6711.09	Rep	u*/ws	0.0128022	0.0159698	-0.921115	0.99021					53	0.525644	6691.44	u*/ws	tau_sk	0.0280937	0.00518623	0.860997	1.18761
54	0.528652	6711.09	u*/ws	Rep	0.0128022	0.0159698	0.99021	-0.921115					54	0.525644	6691.44	tau_sk	u*/ws	0.0280937	0.00518623	1.18761	0.860997
55	0.526165	6699.23	u*/ws	tau_sk	0.232036	0.000695145	0.798717	1.22229					55	0.528589	6710.18	Rep	u*/ws	0.00247861	0.0807146	-0.905848	0.997006
56	0.526165	6699.23	tau_sk	u*/ws	0.232036	0.000695145	1.22229	0.798717					56	0.528589	6710.18	u*/ws	Rep	0.00247861	0.0807146	0.997006	-0.905848
57	0.517327	6742.55	h/D50	u*/ws	3.27899	0.00267802	-0.577083	1.66872					57	0.517037	6738.34	h/D50	u*/ws	1.02738e+73	8.99073e-76	-0.585717	1.7026
58	0.517327	6742.55	u*/ws	h/D50	3.27899	0.00267802	1.66872	-0.577083					58	0.517037	6738.34	u*/ws	h/D50	1.02738e+73	8.99073e-76	1.7026	-0.585717
59	0.509788	6955.06	Rep (u*D)	u*/ws	0.00408787	0.545687	-1.44393	0.817604					59	0.509752	6954.51	u*/ws	Rep (u*D)	0.129908	0.0161037	0.829502	-1.42382
60	0.509788	6955.06	u*/ws	Rep (u*D)	0.00408787	0.545687	0.817604	-1.44393					60	0.509752	6954.51	Rep (u*D)	u*/ws	0.129908	0.0161037	-1.42382	0.829502
61	0.494734	7393.11	Fr	tau_sk	34.6837	6.73794e-05	0.69615	1.28857					61	0.487616	7297.07	h/Kc	u*/ws	2648.07	3.44527e-09	0.290975	1.5198
62	0.494734	7393.11	tau_sk	Fr	34.6837	6.73794e-05	1.28857	0.69615					62	0.487616	7297.07	u*/ws	h/Kc	2648.07	3.44527e-09	1.5198	0.290975
63	0.490311	7347.5	Cf	tau_sk	1.68749e-06	30.02	-0.455679	1.49426					63	0.487616	7297.07	Cf	u*/ws	0.00104478	0.000217026	-0.872947	1.51978
64	0.490311	7347.5	tau_sk	Cf	1.68749e-06	30.02	1.49426	-0.455679					64	0.487616	7297.07	u*/ws	Cf	0.00104478	0.000217026	1.51978	-0.872947
65	0.490311	7347.49	h/Kc	tau_sk	0.0187731	0.0185666	0.151894	1.49421					65	0.489909	7341.61	Cf	tau_sk	1.32031e-07	319.377	-0.48743	1.4545
66	0.490311	7347.49	tau_sk	h/Kc	0.0187731	0.0185666	1.49421	0.151894					66	0.489909	7341.61	tau_sk	Cf	1.32031e-07	319.377	1.4545	-0.48743
67	0.487638	7297.39	Cf	u*/ws	2.83935e-06	0.0778373	-0.875831	1.51997					67	0.489909	7341.61	h/Kc	tau_sk	6.41516e-05	5.17288	0.162487	1.45449
68	0.487638	7297.39	u*/ws	Cf	2.83935e-06	0.0778373	1.51997	-0.875831					68	0.489909	7341.61	tau_sk	h/Kc	6.41516e-05	5.17288	1.45449	0.162487
69	0.487638	7297.39	u*/ws	h/Kc	1.04095e-08	864.775	1.51997	0.291944					69	0.47752	7346.66	u*/ws	S	0.0570177	0.0845097	1.58264	0.538879
70	0.487638	7297.39	h/Kc	u*/ws	1.04095e-08	864.775	0.291944	1.51997					70	0.47752	7346.66	S	u*/ws	0.0570177	0.0845097	0.538879	1.58264
71	0.481683	7427.29	did50	Fr	7.52519e+06	9.88366e-10	-1.55003	1.85924					71	0.470414	7350.48	Rep (u*_sk D)	S	57.6427	0.385307	-2.27872	0.762642
72	0.481683	7427.29	Fr	did50	7.52519e+06	9.88366e-10	1.85924	-1.55003					72	0.470414	7350.48	S	Rep (u*_sk D)	57.6427	0.385307	0.762642	-2.27872
73	0.477894	7352.1	S	u*/ws	0.312147	0.0150933	0.53377	1.55046					73	0.494305	7386.87	Fr	tau_sk	111951	2.05449e-08	0.684991	1.24996
74	0.477894	7352.1	u*/ws	S	0.312147	0.0150933	1.55046	0.53377					74	0.494305	7386.87	tau_sk	Fr	111951	2.05449e-08	1.24996	0.684991
75	0.47668	7462.96	Rep (u*_sk D)	Rep (u*D)	2.32842e-06	10215.7	1.47363	-3.03586					75	0.481517	7424.9	did50	Fr	405.155	1.85128e-05	-1.56144	1.85348
76	0.47668	7462.96	Rep (u*D)	Rep (u*_sk D)	2.32842e-06	10215.7	-3.03586	1.47363					76	0.481517	7424.9	Fr	did50	405.155	1.85128e-05	1.85348	-1.56144
77	0.470673	7353.94	Rep (u*_sk D)	S	5.97416	3.22595	-2.22407	0.757598					77	0.476567	7461.25	Rep (u*_sk D)	Rep (u*D)	0.0459689	0.482651	1.47549	-3.00709
78	0.470673	7353.94	S	Rep (u*_sk D)	5.97416	3.22595	0.757598	-2.22407					78	0.476567	7461.25	Rep (u*D)	Rep (u*_sk D)	0.0459689	0.482651	-3.00709	1.47549
79	0.462636	7786.33	tau_sk	tau	8.41049e+10	1.11296e-14	1.78407	-0.298803					79	0.456184	7728.46	did50	Rep (u*D)	417.497	3.8536e-05	-0.564103	-1.83416
80	0.462636	7786.33	tau	tau_sk	8.41049e+10	1.11296e-14	-0.298803	1.78407					80	0.456184	7728.46	Rep (u*D)	did50	417.497	3.8536e-05	-1.83416	-0.564103
81	0.45916	7922.54	h/D50	tau_sk	6.50234e+08	4.04701e-12	-0.132868	1.52957					81	0.462171	7779.6	tau	tau_sk	0.000418353	2.31501	-0.332388	1.76609
82	0.45916	7922.54	tau_sk	h/D50	6.50234e+08	4.04701e-12	1.52957	-0.132868					82	0.462171	7779.6	tau_sk	tau	0.000418353	2.31501	1.76609	-0.332388
83	0.456232	7729.18	did50	Rep (u*D)	0.49118	0.0342632	-0.548453	-1.85048					83	0.45849	7912.65	h/D50	tau_sk	0.0320581	0.0659122	-0.110438	1.49984
84	0.456232	7729.18	Rep (u*D)	did50	0.49118	0.0342632	-1.85048	-0.548453					84	0.45849	7912.65	tau_sk	h/D50	0.0320581	0.0659122	1.49984	-0.110438
85	0.453494	7980.66	S	tau_sk	0.0115152	0.137459	0.0885957	1.54482					85	0.443445	7939.13	Rep (u*D)	Rep	0.00715745	1.51122	-1.32833	-0.434178
86	0.453494	7980.66	tau_sk	S	0.0115152	0.137459	1.54482	0.0885957					86	0.443445	7939.13	Rep	Rep (u*D)	0.00715745	1.51122	-0.434178	-1.32833
87	0.451462	7972.03	did50	tau_sk	0.270665	0.00241604	-0.143163	1.57067					87	0.451037	7965.79	did50	tau_sk	8.42026	7.66501e-05	-0.185686	1.52655
88	0.451462	7972.03	tau_sk	did50	0.270665	0.00241604	1.57067	-0.143163					88	0.451037	7965.79	tau_sk	did50	8.42026	7.66501e-05	1.52655	-0.185686
89	0.443527	7940.36	Rep (u*D)	Rep	0.0102745	1.08418	-1.33439	-0.447935					89	0.452941	7973.33	S	tau_sk	0.0127903	0.104647	0.0696362	1.52042
90	0.443527	7940.36	Rep	Rep (u*D)	0.0102745	1.08418	-0.447935	-1.33439					90	0.452941	7973.33	tau_sk	S	0.0127903	0.104647	1.52042	0.0696362
91	0.430775	8105.09	Rep (u*D)	Cf	768.929	4.67316e-05	-1.97	0.051268					91	0.430593	8102.49	Rep (u*D)	Cf	72.2611	0.000593227	-1.97297	0.0819074
92	0.430775	8105.09	Cf	Rep (u*D)	768.929	4.67316e-05	0.051268	-1.97					92	0.430593	8102.49	Cf	Rep (u*D)	72.2611	0.000593227	0.0819074	-1.97297
93	0.430775	8105.09	h/Kc	Rep (u*D)	0.0450115	0.642592	-0.0170964	-1.97					93	0.430593	8102.49	h/Kc	Rep (u*D)	0.000327111	92.6517	-0.0272996	-1.97296
94	0.430775	8105.09	Rep (u*D)	h/Kc	0.0450115	0.642592	-1.97	-0.0170964					94	0.430593	8102.49	Rep (u*D)	h/Kc	0.000327111	92.6517	-1.97296	-0.0272996
95	0.428597	8122.57	did50	u*/ws	0.00498994	0.00256946	1.73599	2.46803					95	0.428463	8120.63	did50	u*/ws	0.00650628	0.00200691	1.7289	2.46878
96	0.428597	8122.57	u*/ws	did50	0.00498994	0.00256946	2.46803	1.73599					96	0.428463	8120.63	u*/ws	did50	0.00650628	0.00200691	2.46878	1.7289
97	0.40846	8413.41	h/Kc	Rep	0.0237123	0.131767	-0.122982	-1.42868					97	0.399452	8390.86	h/D50	Rep (u*_sk D)	0.000185373	23806.9	-0.594693	-2.00083
98	0.40846	8413.41	Rep	h/Kc	0.0237123	0.131767	-1.42868	-0.122982					98	0.399452	8390.86	Rep (u*_sk D)	h/D50	0.000185373	23806.9	-2.00083	-0.594693
99	0.399652	8393.75	h/D50	Rep (u*_sk D)	0.00595097	611.29	-0.583326	-1.95534					99	0.408307	8411.27	Rep	Cf	0.237041	0.0746772	-1.43277	0.396845
100	0.399652	8393.75	Rep (u*_sk D)	h/D50	0.00595097	611.29	-1.95534	-0.583326					100	0.408307	8411.27	Cf	Rep	0.237041	0.0746772	0.396845	-1.43277
101	0.396688	8606.81	Rep (u*_sk D)	Rep	1.85739	0.00105042	-0.243073	-1.11393					101	0.408307	8411.27	h/Kc	Rep	0.0358083	0.0921658	-0.132273	-1.43279
102	0.396688	8606.81	Rep	Rep (u*_sk D)	1.85739	0.00105042	-1.11393	-0.243073					102	0.408307	8411.27	Rep	h/Kc	0.0358083	0.0921658	-1.43279	-0.132273
103	0.391519	8613.05	Rep	Cf	0.635802	0.294767	-1.67679	0.765853					103	0.39662	8605.84	Rep (u*_sk D)	Rep	3.00915	0.000637932	-0.235199	-1.10336
104	0.391519	8613.05	Cf	Rep	0.635802	0.294767	0.765853	-1.67679					104	0.39662	8605.84	Rep	Rep (u*_sk D)	3.00915	0.000637932	-1.10336	-0.235199
105	0.388936	8731.42	Cf	tau	7.07666e-07	0.0622901	-1.42804	1.32141					105	0.3887	8727.95	Cf	tau	2.47381e-08	1.58423	-1.45256	1.31714
106	0.388936	8731.42	tau	Cf	7.07666e-07	0.0622901	1.32141	-1.42804					106	0.3887	8727.95	tau	Cf	2.47381e-08	1.58423	1.31714	-1.45256
107	0.388936	8731.42	h/Kc	tau	0.000259238	0.0717057	0.476	1.32136					107	0.3887	8727.95	h/Kc	tau	0.000250166	0.0732757	0.484203	1.31713
108	0.388936	8731.42	tau	h/Kc	0.000259238	0.0717057	1.32136	0.476					108	0.3887	8727.95	tau	h/Kc	0.000250166	0.0732757	1.31713	0.484203
109	0.348545	9293.6	did50	Cf	6.09583e-36	2.09446e+28	-1.79722	-1.29787					109	0.348482	9292.66	did50	Cf	0.00790792	1.51729e-05	-1.79956	-1.31063
110	0.348545	9293.6	Cf	did50	6.09583e-36	2.09446e+28	-1.29787	-1.79722					110	0.348482	9292.66	Cf	did50	0.00790792	1.51729e-05	-1.31063	-1.79956
111	0.348545	9293.6	did50	h/Kc	15.9695	1.94316e-06	-1.79722	0.432614					111	0.348482	9292.66	did50	h/Kc	0.727987	4.22819e-05	-1.79957	0.436868
112	0.348545	9293.6	h/Kc	did50	15.9695	1.94316e-06	0.432614	-1.79722					112	0.348482	9292.66	h/Kc	did50	0.727987	4.22819e-05	0.436868	-1.79957
113	0.34062	9557.16	Fr	tau	0.0465992	0.0895372	1.45743	0.551929					113	0.338831	9397.04	Rep (u*_sk D)	u*/ws	237.974	4.5262e-07	-0.438763	1.23243
114	0.34062	9557.16	tau	Fr	0.0465992	0.0895372	0.551929	1.45743					114	0.338831	9397.04	u*/ws	Rep (u*_sk D)	237.974	4.5262e-07	1.23243	-0.438763
115	0.339021	9399.87	Rep (u*_sk D)	u*/ws	5619.86	1.82363e-08	-0.41712	1.22782					115	0.338018	9406.37	Fr	h/D50	0.00362721	0.0474396	2.42499	0.537815
116	0.339021	9399.87	u*/ws	Rep (u*_sk D)	5619.86	1.82363e-08	1.22782	-0.41712					116	0.338018	9406.37	h/D50	Fr	0.00362721	0.0474396	0.537815	2.42499
117	0.338397	9411.84	h/D50	Fr	0.00448184	0.0447012	0.510605	2.37483					117	0.331228	9520.11	u*/ws	tau	8.40807e+08	4.32832e-14	1.47049	-0.0250181
118	0.338397	9411.84	Fr	h/D50	0.00448184	0.0447012	2.37483	0.510605					118	0.331228	9520.11	tau	u*/ws	8.40807e+08	4.32832e-14	-0.0250181	1.47049
119	0.331531	9524.47	u*/ws	tau	169976	2.13479e-10	1.4652	-0.0451986					119	0.340368	9537.19	Fr	tau	0.0455725	0.0947558	1.43073	0.482186
120	0.331531	9524.47	tau	u*/ws	169976	2.13479e-10	-0.0451986	1.4652					120	0.340368	9537.19	tau	Fr	0.0455725	0.0947558	0.482186	1.43073
121	0.323901	9621.24	Fr	S	0.0450447	0.0085788	2.21379	-0.447496					121	0.323613	9617	Fr	S	2.43436e-08	13742.1	2.25527	-0.473662
122	0.323901	9621.24	S	Fr	0.0450447	0.0085788	-0.447496	2.21379					122	0.323613	9617	S	Fr	2.43436e-08	13742.1	-0.473662	2.25527
123	0.323901	9621.24	Cf	S	0.0114976	0.0336166	-1.10686	0.6594					123	0.323613	9617	Cf	S	0.0627274	0.00533297	-1.12764	0.653973
124	0.323901	9621.24	S	Cf	0.0114976	0.0336166	0.6594	-1.10686					124	0.323613	9617	S	Cf	0.0627274	0.00533297	0.653973	-1.12764
125	0.323895	9621.13	h/Kc	S	0.132167	0.307198	0.368499	0.656032					125	0.323612	9617	Fr	h/Kc	0.0084379	0.294359	1.30792	0.157882
126	0.323895	9621.13	S	h/Kc	0.132167	0.307198	0.656032	0.368499					126	0.323612	9617	h/Kc	Fr	0.0084379	0.294359	0.157882	1.30792
127	0.316658	9735.65	h/Kc	Fr	0.0131093	0.358208	0.121282	1.56387					127	0.32362	9617.07	h/Kc	S	0.125704	0.32373	0.376327	0.657125
128	0.316658	9735.65	Fr	h/Kc	0.0131093	0.358208	1.56387	0.121282					128	0.32362	9617.07	S	h/Kc	0.125704	0.32373	0.657125	0.376327
129	0.295571	10075.5	Fr	Cf	0.0136335	0.389294	1.68543	-0.111896					129	0.295971	10062	Fr	Cf	0.0120292	0.42914	1.68624	-0.12229
130	0.295571	10075.5	Cf	Fr	0.0136335	0.389294	-0.111896	1.68543					130	0.295971	10062	Cf	Fr	0.0120292	0.42914	-0.12229	1.68624
131	0.287554	10191.5	Rep (u*_sk D)	Cf	44.5765	2.82295e-06	-1.41358	-0.610299					131	0.287497	10190.7	Rep (u*_sk D)	Cf	0.00387417	0.03442	-1.40359	-0.598596
132	0.287554	10191.5	Cf	Rep (u*_sk D)	44.5765	2.82295e-06	-0.610299	-1.41358					132	0.287497	10190.7	Cf	Rep (u*_sk D)	0.00387417	0.03442	-0.598596	-1.40359
133	0.287554	10191.5	h/Kc	Rep (u*_sk D)	0.132054	0.0126142	0.203426	-1.41355					133	0.287497	10190.7	h/Kc	Rep (u*_sk D)	3.58088e-05	46.917	0.199523	-1.4036
134	0.287554	10191.5	Rep (u*_sk D)	h/Kc	0.132054	0.0126142	-1.41355	0.203426					134	0.287497	10190.7	Rep (u*_sk D)	h/Kc	3.58088e-05	46.917	-1.4036	0.199523
135	0.273538	10334.6	h/D50	Cf	0.126275	0.0027677	-0.52498	-0.966846					135	0.273353	10331.9	h/D50	Cf	0.600714	0.0005224	-0.521443	-0.983155
136	0.273538	10334.6	Cf	h/D50	0.126275	0.0027677	-0.966846	-0.52498					136	0.273353	10331.9	Cf	h/D50	0.600714	0.0005224	-0.983155	-0.521443
137	0.273538	10334.6	h/Kc	h/D50	0.11835	0.176807	0.322273	-0.524979					137	0.273353	10331.9	h/Kc	h/D50	0.113737	0.176991	0.327717	-0.521441
138	0.273538	10334.6	h/D50	h/Kc	0.11835	0.176807	-0.524979	0.322273					138	0.273353	10331.9	h/D50	h/Kc	0.113737	0.176991	-0.521441	0.327717
139	0.265607	10414.7	Rep (u*_sk D)	tau	4.00878e-07	7744.97	-1.49553	0.507601					139	0.265317	10410.4	tau	Rep (u*_sk D)	0.000137379	24.522	0.518061	-1.53944
140	0.265607	10414.7	tau	Rep (u*_sk D)	4.00878e-07	7744.97	0.507601	-1.49553					140	0.265317	10410.4	Rep (u*_sk D)	tau	0.000137379	24.522	-1.53944	0.518061
141	0.218398	11126.2	did50	Rep (u*_sk D)	12.2006	0.000317773	-0.267147	-1.45413					141	0.21827	11124.3	did50	Rep (u*_sk D)	0.0435847	0.0942389	-0.265599	-1.47857
142	0.218398	11126.2	Rep (u*_sk D)	did50	12.2006	0.000317773	-1.45413	-0.267147					142	0.21827	11124.3	Rep (u*_sk D)	did50	0.0435847	0.0942389	-1.47857	-0.265599
143	0.171906	11914.5	did50	S	0.724567	0.0243158	-0.90983	0.435827					143	0.171404	11907.3	did50	S	2.12553	0.00835744	-0.917086	0.432396
144	0.171906	11914.5	S	did50	0.724567	0.0243158	0.435827	-0.90983					144	0.171404	11907.3	S	did50	2.12553	0.00835744	0.432396	-0.917086
145	0.16881	11924.7	did50	h/D50	0.307492	0.0569203	-0.935775	-0.40559					145	0.168423	11919.1	did50	h/D50	0.0321837	0.574099	-0.943253	-0.407442
146	0.16881	11924.7	h/D50	did50	0.307492	0.0569203	-0.40559	-0.935775					146	0.168423	11919.1	h/D50	did50	0.0321837	0.574099	-0.407442	-0.943253
147	0.132512	12523.5	h/D50	tau	7.67016e+08	1.00331e-11	-0.324249	0.46367					147	0.13185	12513.9	h/D50	tau	81.5928	0.000101096	-0.324597	0.435008
148	0.132512	12523.5	tau	h/D50	7.67016e+08	1.00331e-11	0.46367	-0.324249					148	0.13185	12513.9	tau	h/D50	81.5928	0.000101096	0.435008	-0.324597
149	0.125697	12633.4	S	tau	0.118459	0.0619411	0.338012	0.394552					149	0.120444	12535.1	h/Kc	Cf	0.32703	0.0108348	0.520363	0.772982
150	0.125697	12633.4	tau	S	0.118459	0.0619411	0.394552	0.338012					150	0.120444	12535.1	Cf	h/Kc	0.32703	0.0108348	0.772982	0.520363
151	0.120759	12539.7	h/Kc	Cf	0.304527	0.01266	0.519898	0.792674					151	0.124956	12622.6	S	tau	0.397449	0.0194212	0.336205	0.368505
152	0.120759	12539.7	Cf	h/Kc	0.304527	0.01266	0.792674	0.519898					152	0.124956	12622.6	tau	S	0.397449	0.0194212	0.368505	0.336205
153	0.0943677	13054.5	tau	did50	0.000267854	0.901309	0.394488	-0.56548					153	0.0981299	12956.5	h/D50	S	0.0143537	1.93464	-0.0101914	0.430419
154	0.0943677	13054.5	did50	tau	0.000267854	0.901309	-0.56548	0.394488					154	0.0981299	12956.5	S	h/D50	0.0143537	1.93464	0.430419	-0.0101914
155	0.0295404	13949.4	h/D50	S	0.699689	1.26247	-0.415827	0.357658					155	0.0938076	13046.3	did50	tau	2.69602e+06	9.42762e-11	-0.586785	0.374053
156	0.0295404	13949.4	S	h/D50	0.699689	1.26247	0.357658	-0.415827					156	0.0938076	13046.3	tau	did50	2.69602e+06	9.42762e-11	0.374053	-0.586785
157	0	65535	tau	tau	0	0	0	0					157	0	65535	tau	tau	0	0	0	0
158	0	65535	tau_sk	tau_sk	0	0	0	0					158	0	65535	tau_sk	tau_sk	0	0	0	0
159	0	65535	u*/ws	u*/ws	0	0	0	0					159	0	65535	u*/ws	u*/ws	0	0	0	0
160	0	65535	u*_sk/ws	u*_sk/ws	0	0	0	0					160	0	65535	u*_sk/ws	u*_sk/ws	0	0	0	0
161	0	65535	S	S	0	0	0	0					161	0	65535	S	S	0	0	0	0
162	0	65535	Cf	Cf	0	0	0	0					162	0	65535	Cf	Cf	0	0	0	0
163	0	65535	Rep	Rep	0	0	0	0					163	0	65535	Rep	Rep	0	0	0	0
164	0	65535	Rep (u*D)	Rep (u*D)	0	0	0	0					164	0	65535	Rep (u*D)	Rep (u*D)	0	0	0	0
165	0	65535	Rep (u*_sk D)	Rep (u*_sk D)	0	0	0	0					165	0	65535	Rep (u*_sk D)	Rep (u*_sk D)	0	0	0	0
166	0	65535	h/D50	h/D50	0	0	0	0					166	0	65535	h/D50	h/D50	0	0	0	0
167	0	65535	h/Kc	h/Kc	0	0	0	0					167	0	65535	h/Kc	h/Kc	0	0	0	0
168	0	65535	Fr	Fr	0	0	0	0					168	0	65535	Fr	Fr	0	0	0	0
169	0	65535	did50	did50	0	0	0	0					169	0	65535	did50	did50	0	0	0	0

## Sheet: Rouse_2parameter
Least squares fit													York fit
ranking	rsquared	A	parameter1	parameter2	coeff_p1	coeff_p2	exp_p1	exp_p2					ranking	rsquared	A	parameter1	parameter2	coeff_p1	coeff_p2	exp_p1	exp_p2
1	0.427126	793.936	did50	u*_sk/ws	1.98321	0.334196	0.602857	-0.103634					1	0.426942	792.144	did50	di	3.00563	0.812218	0.616334	0.157829
2	0.427126	793.936	u*_sk/ws	did50	1.98321	0.334196	-0.103634	0.602857					2	0.426942	792.144	di	did50	3.00563	0.812218	0.157829	0.616334
3	0.426359	794.934	did50	Rep	1.87753	0.304878	0.707548	0.0628612					3	0.426465	792.968	u*_sk/ws	did50	222.248	0.00301388	-0.0972038	0.609597
4	0.426359	794.934	Rep	did50	1.87753	0.304878	0.0628612	0.707548					4	0.426465	792.968	did50	u*_sk/ws	222.248	0.00301388	0.609597	-0.0972038
5	0.424779	797.682	did50	u*/ws	0.197992	3.57716	0.556996	-0.122594					5	0.425686	793.95	did50	Rep	15.9092	0.0366979	0.707879	0.0591067
6	0.424779	797.682	u*/ws	did50	0.197992	3.57716	-0.122594	0.556996					6	0.425686	793.95	Rep	did50	15.9092	0.0366979	0.0591067	0.707879
7	0.422834	799.235	did50	Rep (u*D)	0.597208	0.855978	0.673157	0.0780103					7	0.424072	796.645	did50	u*/ws	0.11002	6.44721	0.571131	-0.110923
8	0.422834	799.235	Rep (u*D)	did50	0.597208	0.855978	0.0780103	0.673157					8	0.424072	796.645	u*/ws	did50	0.11002	6.44721	-0.110923	0.571131
9	0.422059	798.449	did50	Fr	0.0492252	10.8793	0.712992	-0.0714802					9	0.421484	797.609	did50	Fr	1.20391	0.44863	0.714862	-0.0751558
10	0.422059	798.449	Fr	did50	0.0492252	10.8793	-0.0714802	0.712992					10	0.421484	797.609	Fr	did50	1.20391	0.44863	-0.0751558	0.714862
11	0.4202	801.157	S	did50	1.25654	0.369808	-0.0282664	0.688452					11	0.422193	798.295	did50	Rep (u*D)	0.0959863	5.46252	0.675371	0.0737747
12	0.4202	801.157	did50	S	1.25654	0.369808	0.688452	-0.0282664					12	0.422193	798.295	Rep (u*D)	did50	0.0959863	5.46252	0.0737747	0.675371
13	0.419883	803.394	Rep (u*_sk D)	did50	0.454268	1.1687	0.0747505	0.6554					13	0.422307	799.274	di	Rep	2849.85	9.3761	1.18201	-0.4084
14	0.419883	803.394	did50	Rep (u*_sk D)	0.454268	1.1687	0.6554	0.0747505					14	0.422307	799.274	Rep	di	2849.85	9.3761	-0.4084	1.18201
15	0.419636	801.857	did50	h/D50	0.00015814	2983.66	0.690046	0.0248413					15	0.419624	800.309	did50	S	0.458606	1.00944	0.688938	-0.0302384
16	0.419636	801.857	h/D50	did50	0.00015814	2983.66	0.0248413	0.690046					16	0.419624	800.309	S	did50	0.458606	1.00944	-0.0302384	0.688938
17	0.418269	806.204	did50	tau	0.000730057	816.908	0.723036	0.0400739					17	0.419043	800.985	did50	h/D50	0.667125	0.700396	0.690602	0.0272715
18	0.418269	806.204	tau	did50	0.000730057	816.908	0.0400739	0.723036					18	0.419043	800.985	h/D50	did50	0.667125	0.700396	0.0272715	0.690602
19	0.417486	805.225	Cref	did50	0.44322	1.23641	-0.00961292	0.694517					19	0.419231	802.439	did50	Rep (u*_sk D)	0.102758	5.31058	0.659642	0.0683659
20	0.417486	805.225	did50	Cref	0.44322	1.23641	0.694517	-0.00961292					20	0.419231	802.439	Rep (u*_sk D)	did50	0.102758	5.31058	0.0683659	0.659642
21	0.416644	807.356	did50	tau_sk	9.43705	0.064979	0.697846	0.0195944					21	0.416845	804.289	did50	Cref	0.618679	0.883349	0.696737	-0.0113409
22	0.416644	807.356	tau_sk	did50	9.43705	0.064979	0.0195944	0.697846					22	0.416845	804.289	Cref	did50	0.618679	0.883349	-0.0113409	0.696737
23	0.416342	807.668	did50	Cf	1.20406	0.545164	0.697324	0.0131807					23	0.417556	805.161	tau	did50	0.000117563	5173.41	0.0312041	0.71649
24	0.416342	807.668	Cf	did50	1.20406	0.545164	0.0131807	0.697324					24	0.417556	805.161	did50	tau	0.000117563	5173.41	0.71649	0.0312041
25	0.416342	807.671	did50	h/Kc	1.07926	0.575191	0.697345	-0.00439329					25	0.416035	806.465	did50	tau_sk	2.29693	0.270842	0.697796	0.0171612
26	0.416342	807.671	h/Kc	did50	1.07926	0.575191	-0.00439329	0.697345					26	0.416035	806.465	tau_sk	did50	2.29693	0.270842	0.0171612	0.697796
27	0.41606	807.975	did50	Cref/S	1.31213	0.462455	0.688455	-0.00022281					27	0.415739	806.787	did50	h/Kc	0.998471	0.63015	0.697559	-0.00395541
28	0.40906	818.004	di	did50	0.607486	0.679933	-0.0430872	0.692193					28	0.415739	806.787	h/Kc	did50	0.998471	0.63015	-0.00395541	0.697559
29	0.40906	818.004	did50	di	0.607486	0.679933	0.692193	-0.0430872					29	0.415739	806.787	did50	Cf	0.752582	0.879002	0.697583	0.011845
30	0.395841	850.272	h/Kc	u*_sk/ws	0.574082	0.897268	0.0999353	-0.459305					30	0.415739	806.787	Cf	did50	0.752582	0.879002	0.011845	0.697583
31	0.395841	850.272	u*_sk/ws	h/Kc	0.574082	0.897268	-0.459305	0.0999353					31	0.41543	807.067	did50	Cref/S	0.257795	2.38564	0.690768	-0.00210593
32	0.395841	850.269	Cf	u*_sk/ws	0.260287	0.556604	-0.299732	-0.459299					32	0.41543	807.067	Cref/S	did50	0.257795	2.38564	-0.00210593	0.690768
33	0.395841	850.269	u*_sk/ws	Cf	0.260287	0.556604	-0.459299	-0.299732					33	0.395305	849.484	u*_sk/ws	Cf	15.3468	0.00954634	-0.45483	-0.299301
34	0.384956	861.488	Rep	u*/ws	2.21367	0.604796	-0.160781	-0.531052					34	0.395305	849.484	Cf	u*_sk/ws	15.3468	0.00954634	-0.299301	-0.45483
35	0.384956	861.488	u*/ws	Rep	2.21367	0.604796	-0.531052	-0.160781					35	0.395309	849.484	h/Kc	u*_sk/ws	0.3433	1.51487	0.0997573	-0.454888
36	0.378007	875.681	Cf	u*/ws	3.26503	0.118398	-0.161456	-0.437758					36	0.395309	849.484	u*_sk/ws	h/Kc	0.3433	1.51487	-0.454888	0.0997573
37	0.378007	875.681	u*/ws	Cf	3.26503	0.118398	-0.437758	-0.161456					37	0.384345	860.584	Rep	u*/ws	1.44197	0.94492	-0.16504	-0.530096
38	0.378007	875.683	h/Kc	u*/ws	0.561571	1.36348	0.0538053	-0.437787					38	0.384345	860.584	u*/ws	Rep	1.44197	0.94492	-0.530096	-0.16504
39	0.378007	875.683	u*/ws	h/Kc	0.561571	1.36348	-0.437787	0.0538053					39	0.377443	874.847	h/Kc	u*/ws	0.456459	1.69092	0.0541868	-0.434833
40	0.372353	877.022	Rep	u*_sk/ws	1.47018	0.875008	-0.296039	-0.604879					40	0.377443	874.847	u*/ws	h/Kc	0.456459	1.69092	-0.434833	0.0541868
41	0.372353	877.022	u*_sk/ws	Rep	1.47018	0.875008	-0.604879	-0.296039					41	0.377298	875.036	u*/ws	Cf	2.95993	0.124992	-0.428882	-0.168985
42	0.370991	888.766	Cref/S	u*/ws	0.504035	2.27749	0.0749258	-0.476322					42	0.377298	875.036	Cf	u*/ws	2.95993	0.124992	-0.168985	-0.428882
43	0.370991	888.766	u*/ws	Cref/S	0.504035	2.27749	-0.476322	0.0749258					43	0.371855	876.294	u*_sk/ws	Rep	0.199894	6.55599	-0.605327	-0.300758
44	0.370573	886.283	di	h/Kc	0.184712	1006.12	0.721667	0.0988087					44	0.371855	876.294	Rep	u*_sk/ws	0.199894	6.55599	-0.300758	-0.605327
45	0.370573	886.283	h/Kc	di	0.184712	1006.12	0.0988087	0.721667					45	0.370066	885.541	h/Kc	di	3.55953e-11	5.17295e+12	0.0992582	0.719286
46	0.370573	886.284	di	Cf	37.8869	1.3989	0.721678	-0.296439					46	0.370066	885.541	di	h/Kc	3.55953e-11	5.17295e+12	0.719286	0.0992582
47	0.370573	886.284	Cf	di	37.8869	1.3989	-0.296439	0.721678					47	0.370066	885.541	di	Cf	32.7665	1.59358	0.719296	-0.297779
48	0.367945	899.196	Cref/S	u*_sk/ws	0.647935	1.61242	0.145646	-0.515534					48	0.370066	885.541	Cf	di	32.7665	1.59358	-0.297779	0.719296
49	0.367945	899.196	u*_sk/ws	Cref/S	0.647935	1.61242	-0.515534	0.145646					49	0.370464	887.995	Cref/S	u*/ws	6.72133	0.172407	0.0747364	-0.473686
50	0.352225	913.034	h/D50	u*/ws	0.0674936	7.57439	0.0697451	-0.480334					50	0.370464	887.995	u*/ws	Cref/S	6.72133	0.172407	-0.473686	0.0747364
51	0.352225	913.034	u*/ws	h/D50	0.0674936	7.57439	-0.480334	0.0697451					51	0.367469	898.492	Cref/S	u*_sk/ws	0.510005	2.05296	0.144331	-0.508285
52	0.341961	930.216	S	u*/ws	0.786056	0.749313	-0.0572088	-0.464477					52	0.367469	898.492	u*_sk/ws	Cref/S	0.510005	2.05296	-0.508285	0.144331
53	0.341961	930.216	u*/ws	S	0.786056	0.749313	-0.464477	-0.0572088					53	0.351747	912.328	h/D50	u*/ws	0.589209	0.861493	0.0716472	-0.479695
54	0.338282	935.658	Rep (u*D)	u*/ws	1.54913	0.910831	-0.123932	-0.506018					54	0.351747	912.328	u*/ws	h/D50	0.589209	0.861493	-0.479695	0.0716472
55	0.338282	935.658	u*/ws	Rep (u*D)	1.54913	0.910831	-0.506018	-0.123932					55	0.341497	929.536	S	u*/ws	0.10285	5.83162	-0.0564963	-0.463315
56	0.337525	934.81	u*_sk/ws	u*/ws	1.32753	0.808891	0.211673	-0.648047					56	0.341497	929.536	u*/ws	S	0.10285	5.83162	-0.463315	-0.0564963
57	0.337525	934.81	u*/ws	u*_sk/ws	1.32753	0.808891	-0.648047	0.211673					57	0.336957	933.979	u*_sk/ws	u*/ws	0.808305	1.35282	0.219308	-0.655464
58	0.334974	940.084	u*/ws	tau_sk	0.248065	4.44066	-0.498092	0.086746					58	0.336957	933.979	u*/ws	u*_sk/ws	0.808305	1.35282	-0.655464	0.219308
59	0.334974	940.084	tau_sk	u*/ws	0.248065	4.44066	0.086746	-0.498092					59	0.337752	934.882	Rep (u*D)	u*/ws	1.47788	0.956838	-0.12011	-0.503728
60	0.334732	940.197	u*/ws	di	0.669849	0.188603	-0.59218	-0.257847					60	0.337752	934.882	u*/ws	Rep (u*D)	1.47788	0.956838	-0.503728	-0.12011
61	0.334732	940.197	di	u*/ws	0.669849	0.188603	-0.257847	-0.59218					61	0.334413	939.267	tau_sk	u*/ws	0.828908	1.35208	0.0861482	-0.499768
62	0.333445	946.391	Rep (u*D)	di	6061.81	34.9527	-0.632285	1.31357					62	0.334413	939.267	u*/ws	tau_sk	0.828908	1.35208	-0.499768	0.0861482
63	0.333445	946.391	di	Rep (u*D)	6061.81	34.9527	1.31357	-0.632285					63	0.3342	939.42	di	u*/ws	2.30059	0.0571469	-0.254549	-0.589902
64	0.331671	944.709	Cref	u*/ws	1.86444	0.665152	0.0202395	-0.454812					64	0.3342	939.42	u*/ws	di	2.30059	0.0571469	-0.589902	-0.254549
65	0.331671	944.709	u*/ws	Cref	1.86444	0.665152	-0.454812	0.0202395					65	0.331135	943.925	Cref	u*/ws	2.74485	0.458924	0.0201925	-0.455856
66	0.330245	947.712	Rep (u*_sk D)	u*/ws	1.57117	0.820314	-0.106199	-0.506524					66	0.331135	943.925	u*/ws	Cref	2.74485	0.458924	-0.455856	0.0201925
67	0.330245	947.712	u*/ws	Rep (u*_sk D)	1.57117	0.820314	-0.506524	-0.106199					67	0.332967	945.688	di	Rep (u*D)	156046	1.21565	1.30234	-0.621142
68	0.32754	948.833	u*/ws	tau	0.310924	3.16639	-0.430402	-0.0390092					68	0.332967	945.688	Rep (u*D)	di	156046	1.21565	-0.621142	1.30234
69	0.32754	948.833	tau	u*/ws	0.310924	3.16639	-0.0390092	-0.430402					69	0.329699	946.912	Rep (u*_sk D)	u*/ws	2.95807	0.430894	-0.0959709	-0.501471
70	0.325463	953.314	Fr	u*/ws	0.117135	8.6579	0.0138373	-0.450532					70	0.329699	946.912	u*/ws	Rep (u*_sk D)	2.95807	0.430894	-0.501471	-0.0959709
71	0.325463	953.314	u*/ws	Fr	0.117135	8.6579	-0.450532	0.0138373					71	0.326893	947.88	tau	u*/ws	0.529802	1.88268	-0.0486206	-0.425367
72	0.316135	972.819	di	Cref/S	42.87	11.2581	0.76052	0.126166					72	0.326893	947.88	u*/ws	tau	0.529802	1.88268	-0.425367	-0.0486206
73	0.316135	972.819	Cref/S	di	42.87	11.2581	0.126166	0.76052					73	0.324912	952.518	Fr	u*/ws	0.559094	1.85672	0.0179547	-0.451303
74	0.273386	1034.45	Cref	u*_sk/ws	0.196234	7.36373	0.0582815	-0.428468					74	0.324912	952.518	u*/ws	Fr	0.559094	1.85672	-0.451303	0.0179547
75	0.273386	1034.45	u*_sk/ws	Cref	0.196234	7.36373	-0.428468	0.0582815					75	0.315746	972.249	Cref/S	di	11565	0.0411469	0.12645	0.75752
76	0.268712	1041.12	u*_sk/ws	Rep (u*D)	5.38781	0.291622	-0.537488	-0.277621					76	0.315746	972.249	di	Cref/S	11565	0.0411469	0.75752	0.12645
77	0.268712	1041.12	Rep (u*D)	u*_sk/ws	5.38781	0.291622	-0.277621	-0.537488					77	0.272957	1033.83	Cref	u*_sk/ws	0.310662	4.70109	0.0579822	-0.429349
78	0.259996	1050.23	u*_sk/ws	Fr	0.861274	1.17324	-0.395049	0.167187					78	0.272957	1033.83	u*_sk/ws	Cref	0.310662	4.70109	-0.429349	0.0579822
79	0.259996	1050.23	Fr	u*_sk/ws	0.861274	1.17324	0.167187	-0.395049					79	0.268318	1040.54	Rep (u*D)	u*_sk/ws	2.37482	0.653445	-0.269136	-0.5323
80	0.25274	1055.14	tau	u*_sk/ws	1.13446	0.656324	-0.125237	-0.320576					80	0.268318	1040.54	u*_sk/ws	Rep (u*D)	2.37482	0.653445	-0.5323	-0.269136
81	0.25274	1055.14	u*_sk/ws	tau	1.13446	0.656324	-0.320576	-0.125237					81	0.259469	1049.48	Fr	u*_sk/ws	1.20426	0.862458	0.172052	-0.399072
82	0.249169	1058.17	di	tau	69282.1	0.000652711	0.501104	-0.155198					82	0.259469	1049.48	u*_sk/ws	Fr	1.20426	0.862458	-0.399072	0.172052
83	0.249169	1058.17	tau	di	69282.1	0.000652711	-0.155198	0.501104					83	0.252148	1054.28	u*_sk/ws	tau	0.614854	1.2313	-0.317175	-0.136741
84	0.248568	1071.43	tau_sk	u*_sk/ws	0.895475	0.956578	0.155749	-0.478609					84	0.252148	1054.28	tau	u*_sk/ws	0.614854	1.2313	-0.136741	-0.317175
85	0.248568	1071.43	u*_sk/ws	tau_sk	0.895475	0.956578	-0.478609	0.155749					85	0.248492	1057.19	tau	di	88.4819	0.513751	-0.167741	0.499255
86	0.245812	1070.4	Cf	Rep (u*D)	5.90898	0.00329765	-0.385099	0.462979					86	0.248492	1057.19	di	tau	88.4819	0.513751	0.499255	-0.167741
87	0.245812	1070.4	Rep (u*D)	Cf	5.90898	0.00329765	0.462979	-0.385099					87	0.245393	1069.79	Rep (u*D)	Cf	0.00667074	2.93032	0.458162	-0.388375
88	0.245812	1070.39	h/Kc	Rep (u*D)	0.240232	0.413971	0.128371	0.462969					88	0.245393	1069.79	Cf	Rep (u*D)	0.00667074	2.93032	-0.388375	0.458162
89	0.245812	1070.39	Rep (u*D)	h/Kc	0.240232	0.413971	0.462969	0.128371					89	0.245391	1069.79	h/Kc	Rep (u*D)	0.414156	0.24426	0.129467	0.458109
90	0.232831	1089.16	Rep (u*_sk D)	Cf	0.0234558	2.48853	0.435276	-0.24104					90	0.245391	1069.79	Rep (u*D)	h/Kc	0.414156	0.24426	0.458109	0.129467
91	0.232831	1089.16	Cf	Rep (u*_sk D)	0.0234558	2.48853	-0.24104	0.435276					91	0.248121	1070.77	u*_sk/ws	tau_sk	0.49934	1.73681	-0.479926	0.15115
92	0.232831	1089.17	h/Kc	Rep (u*_sk D)	0.169066	0.957684	0.0803371	0.435263					92	0.248121	1070.77	tau_sk	u*_sk/ws	0.49934	1.73681	0.15115	-0.479926
93	0.232831	1089.17	Rep (u*_sk D)	h/Kc	0.169066	0.957684	0.435263	0.0803371					93	0.232378	1088.5	h/Kc	Rep (u*_sk D)	1.55967	0.104803	0.0820632	0.432319
94	0.229598	1095.21	h/D50	u*_sk/ws	0.366805	1.47874	0.027853	-0.374642					94	0.232378	1088.5	Rep (u*_sk D)	h/Kc	1.55967	0.104803	0.432319	0.0820632
95	0.229598	1095.21	u*_sk/ws	h/D50	0.366805	1.47874	-0.374642	0.027853					95	0.232376	1088.5	Rep (u*_sk D)	Cf	0.325422	0.177203	0.432275	-0.246188
96	0.229577	1095.98	S	u*_sk/ws	0.702372	0.77444	-0.0293727	-0.372351					96	0.232376	1088.5	Cf	Rep (u*_sk D)	0.325422	0.177203	-0.246188	0.432275
97	0.229577	1095.98	u*_sk/ws	S	0.702372	0.77444	-0.372351	-0.0293727					97	0.22666	1094	Rep (u*_sk D)	Rep	3.8951	0.0520645	0.701186	-0.280271
98	0.227171	1094.75	Rep (u*_sk D)	Rep	2.38922	0.0836308	0.697839	-0.272923					98	0.22666	1094	Rep	Rep (u*_sk D)	3.8951	0.0520645	-0.280271	0.701186
99	0.227171	1094.75	Rep	Rep (u*_sk D)	2.38922	0.0836308	-0.272923	0.697839					99	0.229222	1094.67	h/D50	u*_sk/ws	7.40477	0.0720627	0.030915	-0.377947
100	0.225703	1102.01	Rep (u*_sk D)	u*_sk/ws	0.231126	2.86656	0.0362381	-0.353851					100	0.229222	1094.67	u*_sk/ws	h/D50	7.40477	0.0720627	-0.377947	0.030915
101	0.225703	1102.01	u*_sk/ws	Rep (u*_sk D)	0.231126	2.86656	-0.353851	0.0362381					101	0.229249	1095.5	S	u*_sk/ws	0.968327	0.562598	-0.0307066	-0.375154
102	0.225655	1102.26	di	u*_sk/ws	1.74176	0.711702	0.0664465	-0.333924					102	0.229249	1095.5	u*_sk/ws	S	0.968327	0.562598	-0.375154	-0.0307066
103	0.225655	1102.26	u*_sk/ws	di	1.74176	0.711702	-0.333924	0.0664465					103	0.225329	1101.47	Rep (u*_sk D)	u*_sk/ws	6.52668	0.10239	0.0396289	-0.356025
104	0.225125	1105.96	Cref	di	5.41045	30.3658	0.0374044	0.613891					104	0.225329	1101.47	u*_sk/ws	Rep (u*_sk D)	6.52668	0.10239	-0.356025	0.0396289
105	0.225125	1105.96	di	Cref	5.41045	30.3658	0.613891	0.0374044					105	0.225259	1101.77	di	u*_sk/ws	2.17047	0.847485	0.112447	-0.311476
106	0.224317	1103.87	di	S	4.95596	11.7893	0.61121	-0.0638347					106	0.225259	1101.77	u*_sk/ws	di	2.17047	0.847485	-0.311476	0.112447
107	0.224317	1103.87	S	di	4.95596	11.7893	-0.0638347	0.61121					107	0.223987	1103.38	S	di	3.91775	15.5637	-0.0663906	0.617547
108	0.218118	1115.34	di	Rep (u*_sk D)	1.73066	957.341	0.868974	-0.276794					108	0.223987	1103.38	di	S	3.91775	15.5637	0.617547	-0.0663906
109	0.218118	1115.34	Rep (u*_sk D)	di	1.73066	957.341	-0.276794	0.868974					109	0.224732	1105.39	Cref	di	5.19864	33.393	0.0370546	0.61916
110	0.216778	1114.76	h/D50	di	8.15183	7.41996	0.0478249	0.601931					110	0.224732	1105.39	di	Cref	5.19864	33.393	0.61916	0.0370546
111	0.216778	1114.76	di	h/D50	8.15183	7.41996	0.601931	0.0478249					111	0.216406	1114.22	di	h/D50	52.1225	1.20905	0.609158	0.051157
112	0.215238	1118.59	Fr	di	92.2577	1.02796	0.0944164	0.577843					112	0.216406	1114.22	h/D50	di	52.1225	1.20905	0.051157	0.609158
113	0.215238	1118.59	di	Fr	92.2577	1.02796	0.577843	0.0944164					113	0.217776	1114.85	Rep (u*_sk D)	di	88.9312	18.4556	-0.269255	0.868071
114	0.205021	1118.78	Rep (u*_sk D)	tau	3.84818	0.0818857	0.338906	-0.208					114	0.217776	1114.85	di	Rep (u*_sk D)	88.9312	18.4556	0.868071	-0.269255
115	0.205021	1118.78	tau	Rep (u*_sk D)	3.84818	0.0818857	-0.208	0.338906					115	0.204233	1117.63	Rep (u*_sk D)	tau	1.10128	0.292555	0.33941	-0.222485
116	0.204148	1135.97	di	tau_sk	68.7078	1.3101	0.591404	0.0153997					116	0.204233	1117.63	tau	Rep (u*_sk D)	1.10128	0.292555	-0.222485	0.33941
117	0.204148	1135.97	tau_sk	di	68.7078	1.3101	0.0153997	0.591404					117	0.214802	1117.96	di	Fr	419.098	0.246067	0.585268	0.0972819
118	0.168861	1181.23	Rep (u*D)	Rep	0.152495	0.931288	0.780811	-0.451603					118	0.214802	1117.96	Fr	di	419.098	0.246067	0.0972819	0.585268
119	0.168861	1181.23	Rep	Rep (u*D)	0.152495	0.931288	-0.451603	0.780811					119	0.20367	1135.27	di	tau_sk	88.5591	1.02489	0.591411	0.00617765
120	0.164905	1195.97	Cref/S	Rep (u*_sk D)	0.249229	1.04269	0.0772571	0.426419					120	0.168504	1180.71	Rep (u*D)	Rep	0.577861	0.249528	0.78166	-0.458543
121	0.164905	1195.97	Rep (u*_sk D)	Cref/S	0.249229	1.04269	0.426419	0.0772571					121	0.168504	1180.71	Rep	Rep (u*D)	0.577861	0.249528	-0.458543	0.78166
122	0.164113	1192.46	Rep (u*_sk D)	Rep (u*D)	0.476754	0.652737	0.776859	-0.403663					122	0.163643	1191.78	Rep (u*_sk D)	Rep (u*D)	4.80047	0.0661757	0.796536	-0.422752
123	0.164113	1192.46	Rep (u*D)	Rep (u*_sk D)	0.476754	0.652737	-0.403663	0.776859					123	0.163643	1191.78	Rep (u*D)	Rep (u*_sk D)	4.80047	0.0661757	-0.422752	0.796536
124	0.155865	1206.37	Rep (u*_sk D)	S	0.393347	0.240169	0.450047	-0.0913808					124	0.152794	1192.38	Rep (u*D)	tau	0.00924996	40.1699	0.202744	-0.255684
125	0.155865	1206.37	S	Rep (u*_sk D)	0.393347	0.240169	-0.0913808	0.450047					125	0.152794	1192.38	tau	Rep (u*D)	0.00924996	40.1699	-0.255684	0.202744
126	0.153519	1193.44	Rep (u*D)	tau	0.639749	0.57171	0.19996	-0.240497					126	0.164591	1195.51	Cref/S	Rep (u*_sk D)	0.366968	0.719709	0.0787619	0.424275
127	0.153519	1193.44	tau	Rep (u*D)	0.639749	0.57171	-0.240497	0.19996					127	0.164591	1195.51	Rep (u*_sk D)	Cref/S	0.366968	0.719709	0.424275	0.0787619
128	0.148662	1202.37	Cf	tau_sk	0.111093	1.01558	-0.236674	-0.210609					128	0.148304	1201.84	tau_sk	h/Kc	0.456626	0.668822	-0.218016	0.0816051
129	0.148662	1202.37	tau_sk	Cf	0.111093	1.01558	-0.210609	-0.236674					129	0.148304	1201.84	h/Kc	tau_sk	0.456626	0.668822	0.0816051	-0.218016
130	0.148662	1202.37	h/Kc	tau_sk	0.249886	1.2294	0.0788973	-0.210631					130	0.148304	1201.84	Cf	tau_sk	0.380872	0.284603	-0.244763	-0.217962
131	0.148662	1202.37	tau_sk	h/Kc	0.249886	1.2294	-0.210631	0.0788973					131	0.148304	1201.84	tau_sk	Cf	0.380872	0.284603	-0.217962	-0.244763
132	0.142411	1222.94	Rep (u*_sk D)	tau_sk	7.49495	0.0338277	0.348807	-0.120096					132	0.155561	1205.92	S	Rep (u*_sk D)	0.231784	0.395417	-0.0951972	0.452412
133	0.142411	1222.94	tau_sk	Rep (u*_sk D)	7.49495	0.0338277	-0.120096	0.348807					133	0.155561	1205.92	Rep (u*_sk D)	S	0.231784	0.395417	0.452412	-0.0951972
134	0.136405	1235.78	Rep	Cf	0.0544328	0.895951	0.208149	-0.358281					134	0.141881	1222.17	Rep (u*_sk D)	tau_sk	7.86043	0.0324017	0.35005	-0.131883
135	0.136405	1235.78	Cf	Rep	0.0544328	0.895951	-0.358281	0.208149					135	0.141881	1222.17	tau_sk	Rep (u*_sk D)	7.86043	0.0324017	-0.131883	0.35005
136	0.136405	1235.78	h/Kc	Rep	0.337819	0.657706	0.119423	0.20816					136	0.126008	1231.98	Fr	tau	1.59104	0.45331	0.125086	-0.251355
137	0.136405	1235.78	Rep	h/Kc	0.337819	0.657706	0.20816	0.119423					137	0.126008	1231.98	tau	Fr	1.59104	0.45331	-0.251355	0.125086
138	0.135363	1238.2	h/D50	Rep (u*_sk D)	1.94973	0.0690586	0.0567275	0.408476					138	0.135958	1235.12	Rep	Cf	0.0962112	0.514363	0.199308	-0.358956
139	0.135363	1238.2	Rep (u*_sk D)	h/D50	1.94973	0.0690586	0.408476	0.0567275					139	0.135958	1235.12	Cf	Rep	0.0962112	0.514363	-0.358956	0.199308
140	0.126636	1232.9	Fr	tau	1.02981	0.681321	0.121239	-0.237879					140	0.135958	1235.12	h/Kc	Rep	0.445719	0.507261	0.119661	0.199326
141	0.126636	1232.9	tau	Fr	1.02981	0.681321	-0.237879	0.121239					141	0.135958	1235.12	Rep	h/Kc	0.445719	0.507261	0.199326	0.119661
142	0.124323	1237.2	Cf	tau	0.196788	1.50484	-0.10353	-0.178427					142	0.123813	1236.46	Cf	tau	0.400742	0.74786	-0.104569	-0.190436
143	0.124323	1237.2	tau	Cf	0.196788	1.50484	-0.178427	-0.10353					143	0.123813	1236.46	tau	Cf	0.400742	0.74786	-0.190436	-0.104569
144	0.124323	1237.2	h/Kc	tau	0.0345468	13.2856	0.034513	-0.178424					144	0.123815	1236.46	h/Kc	tau	0.421066	1.10809	0.0348385	-0.190447
145	0.124323	1237.2	tau	h/Kc	0.0345468	13.2856	-0.178424	0.034513					145	0.123815	1236.46	tau	h/Kc	0.421066	1.10809	-0.190447	0.0348385
146	0.122573	1239.04	Cref	tau	0.818275	0.961202	0.0309737	-0.245577					146	0.13507	1237.78	h/D50	Rep (u*_sk D)	0.164577	0.800052	0.0597299	0.409416
147	0.122573	1239.04	tau	Cref	0.818275	0.961202	-0.245577	0.0309737					147	0.13507	1237.78	Rep (u*_sk D)	h/D50	0.164577	0.800052	0.409416	0.0597299
148	0.120481	1242.35	Cref/S	tau	0.900466	0.648949	0.038923	-0.225209					148	0.122005	1238.2	Cref	tau	0.739587	1.09655	0.0319982	-0.259117
149	0.120481	1242.35	tau	Cref/S	0.900466	0.648949	-0.225209	0.038923					149	0.122005	1238.2	tau	Cref	0.739587	1.09655	-0.259117	0.0319982
150	0.120235	1262.91	Cref	Rep (u*_sk D)	0.506184	0.576187	0.012281	0.36966					150	0.119966	1241.6	Cref/S	tau	0.545219	1.09311	0.040168	-0.237661
151	0.120235	1262.91	Rep (u*_sk D)	Cref	0.506184	0.576187	0.36966	0.012281					151	0.119966	1241.6	tau	Cref/S	0.545219	1.09311	-0.237661	0.040168
152	0.118639	1264.75	Fr	Rep (u*_sk D)	0.224065	1.20588	0.02538	0.363916					152	0.112465	1252.35	S	tau	1.12828	0.719181	0.0362252	-0.266748
153	0.118639	1264.75	Rep (u*_sk D)	Fr	0.224065	1.20588	0.363916	0.02538					153	0.112465	1252.35	tau	S	1.12828	0.719181	-0.266748	0.0362252
154	0.118574	1268.24	Cref/S	Rep (u*D)	0.118883	2.17048	0.11946	0.356589					154	0.109365	1258.15	h/D50	tau	6.80374	0.100143	-0.01769	-0.251559
155	0.118574	1268.24	Rep (u*D)	Cref/S	0.118883	2.17048	0.356589	0.11946					155	0.109365	1258.15	tau	h/D50	6.80374	0.100143	-0.251559	-0.01769
156	0.113091	1253.26	S	tau	0.757727	1.02941	0.0342583	-0.251731					156	0.109063	1258.9	Rep	tau	0.714818	0.776661	0.0209202	-0.248041
157	0.113091	1253.26	tau	S	0.757727	1.02941	-0.251731	0.0342583					157	0.109063	1258.9	tau	Rep	0.714818	0.776661	-0.248041	0.0209202
158	0.109951	1259.01	h/D50	tau	0.432731	1.56962	-0.0192311	-0.238743					158	0.107971	1259.81	tau_sk	tau	0.118341	4.70819	-0.0206891	-0.233395
159	0.109951	1259.01	tau	h/D50	0.432731	1.56962	-0.238743	-0.0192311					159	0.107971	1259.81	tau	tau_sk	0.118341	4.70819	-0.233395	-0.0206891
160	0.109703	1259.84	Rep	tau	1.32475	0.409242	0.0259123	-0.235187					160	0.119945	1262.48	Cref	Rep (u*_sk D)	0.809609	0.360973	0.0117127	0.371059
161	0.109703	1259.84	tau	Rep	1.32475	0.409242	-0.235187	0.0259123					161	0.119945	1262.48	Rep (u*_sk D)	Cref	0.809609	0.360973	0.371059	0.0117127
162	0.108532	1260.63	tau_sk	tau	0.272058	2.00763	-0.0219014	-0.219153					162	0.118345	1264.32	Fr	Rep (u*_sk D)	0.875279	0.312163	0.02683	0.365261
163	0.108532	1260.63	tau	tau_sk	0.272058	2.00763	-0.219153	-0.0219014					163	0.118345	1264.32	Rep (u*_sk D)	Fr	0.875279	0.312163	0.365261	0.02683
164	0.105859	1271.21	Fr	tau_sk	0.0326751	21.4427	0.266982	-0.274304					164	0.118288	1267.82	Rep (u*D)	Cref/S	0.49951	0.531436	0.347368	0.119791
165	0.105859	1271.21	tau_sk	Fr	0.0326751	21.4427	-0.274304	0.266982					165	0.118288	1267.82	Cref/S	Rep (u*D)	0.49951	0.531436	0.119791	0.347368
166	0.10265	1275.67	Cref/S	tau_sk	0.453355	1.08208	0.0968963	-0.24785					166	0.105361	1270.49	Fr	tau_sk	0.241585	2.98138	0.278454	-0.287229
167	0.10265	1275.67	tau_sk	Cref/S	0.453355	1.08208	-0.24785	0.0968963					167	0.105361	1270.49	tau_sk	Fr	0.241585	2.98138	-0.287229	0.278454
168	0.0817963	1310.05	Cref	tau_sk	0.431347	1.92593	0.0613136	-0.253751					168	0.10238	1275.27	Cref/S	tau_sk	3.19934	0.15483	0.10101	-0.256645
169	0.0817963	1310.05	tau_sk	Cref	0.431347	1.92593	-0.253751	0.0613136					169	0.10238	1275.27	tau_sk	Cref/S	3.19934	0.15483	-0.256645	0.10101
170	0.0777328	1314.79	Cref/S	Cf	0.124115	1.06254	-0.0194363	-0.21676					170	0.0815149	1309.64	tau_sk	Cref	0.590254	1.44233	-0.263588	0.0631369
171	0.0777328	1314.79	Cf	Cref/S	0.124115	1.06254	-0.21676	-0.0194363					171	0.0815149	1309.64	Cref	tau_sk	0.590254	1.44233	0.0631369	-0.263588
172	0.0777328	1314.8	Cref/S	h/Kc	0.24532	1.34551	-0.0194375	0.0722489					172	0.0774008	1314.31	Cref/S	Cf	0.29516	0.429199	-0.018812	-0.225342
173	0.0777328	1314.8	h/Kc	Cref/S	0.24532	1.34551	0.0722489	-0.0194375					173	0.0774008	1314.31	Cf	Cref/S	0.29516	0.429199	-0.225342	-0.018812
174	0.0765284	1316.64	S	Fr	0.128102	1.31853	-0.186577	0.398807					174	0.0774042	1314.31	Cref/S	h/Kc	0.444599	0.739516	-0.0188409	0.0751051
175	0.0765284	1316.64	Fr	S	0.128102	1.31853	0.398807	-0.186577					175	0.0774042	1314.31	h/Kc	Cref/S	0.444599	0.739516	0.0751051	-0.0188409
176	0.0765284	1316.64	Fr	Cf	0.135647	1.2452	0.0256674	-0.186579					176	0.0761625	1316.11	Fr	Cf	0.362602	0.439539	0.0228267	-0.197223
177	0.0765284	1316.64	Cf	Fr	0.135647	1.2452	-0.186579	0.0256674					177	0.0761625	1316.11	Cf	Fr	0.362602	0.439539	-0.197223	0.0228267
178	0.0765284	1316.64	Cf	S	0.213405	0.791425	-0.199392	0.0128121					178	0.0761621	1316.11	h/Kc	S	0.741191	0.519968	0.0695521	0.0114111
179	0.0765284	1316.64	S	Cf	0.213405	0.791425	0.0128121	-0.199392					179	0.0761621	1316.11	S	h/Kc	0.741191	0.519968	0.0114111	0.0695521
180	0.0765284	1316.65	Fr	h/Kc	0.504399	0.737712	0.0257041	0.0621771					180	0.0761619	1316.11	Fr	S	0.301174	0.529091	0.417301	-0.197247
181	0.0765284	1316.65	h/Kc	Fr	0.504399	0.737712	0.0621771	0.0257041					181	0.0761619	1316.11	S	Fr	0.301174	0.529091	-0.197247	0.417301
182	0.0765284	1316.65	h/Kc	S	0.70589	0.556612	0.0664603	0.0128535					182	0.0761615	1316.11	Cf	S	0.0717091	2.22242	-0.208668	0.0114259
183	0.0765284	1316.65	S	h/Kc	0.70589	0.556612	0.0128535	0.0664603					183	0.0761615	1316.11	S	Cf	0.0717091	2.22242	0.0114259	-0.208668
184	0.0761826	1317.24	h/Kc	h/D50	0.330882	1.15443	0.0653659	-0.00870378					184	0.0761597	1316.11	Fr	h/Kc	0.45642	0.804583	0.0228117	0.0657525
185	0.0761826	1317.24	h/D50	h/Kc	0.330882	1.15443	-0.00870378	0.0653659					185	0.0761597	1316.11	h/Kc	Fr	0.45642	0.804583	0.0657525	0.0228117
186	0.0758836	1317.27	Cf	Cref	0.852911	0.174567	-0.194842	-0.00283563					186	0.0757952	1316.68	h/Kc	h/D50	0.212485	1.74275	0.0683674	-0.00618465
187	0.0758836	1317.27	Cref	Cf	0.852911	0.174567	-0.00283563	-0.194842					187	0.0757952	1316.68	h/D50	h/Kc	0.212485	1.74275	-0.00618465	0.0683674
188	0.0758836	1317.27	h/Kc	Cref	0.717527	0.473287	0.0649392	-0.00285187					188	0.0757961	1316.68	Cf	h/D50	0.306341	0.507408	-0.205092	-0.00618177
189	0.0758836	1317.27	Cref	h/Kc	0.717527	0.473287	-0.00285187	0.0649392					189	0.0757961	1316.68	h/D50	Cf	0.306341	0.507408	-0.00618177	-0.205092
190	0.075765	1317.49	Cf	h/Kc	1.024	0.770019	0.191007	0.127913					190	0.0755402	1316.77	Cref	Cf	15.3913	0.00917945	-0.00310655	-0.204872
191	0.075765	1317.49	h/Kc	Cf	1.024	0.770019	0.127913	0.191007					191	0.0755402	1316.77	Cf	Cref	15.3913	0.00917945	-0.204872	-0.00310655
192	0.0634508	1336.8	Fr	h/D50	0.637306	0.287849	0.376561	0.161231					192	0.0755424	1316.77	Cref	h/Kc	0.77856	0.43189	-0.0031099	0.0682825
193	0.0634508	1336.8	h/D50	Fr	0.637306	0.287849	0.161231	0.376561					193	0.0755424	1316.77	h/Kc	Cref	0.77856	0.43189	0.0682825	-0.0031099
194	0.0583139	1349.21	Rep (u*D)	tau_sk	0.248441	1.35648	0.132113	-0.118663					194	0.0754135	1316.98	h/Kc	Cf	0.604826	0.849314	0.0980954	0.0914352
195	0.0583139	1349.21	tau_sk	Rep (u*D)	0.248441	1.35648	-0.118663	0.132113					195	0.0754135	1316.98	Cf	h/Kc	0.604826	0.849314	0.0914352	0.0980954
196	0.057566	1357.4	Fr	Rep (u*D)	0.307998	1.2555	0.130714	0.202096					196	0.0630863	1336.26	Fr	h/D50	21.583	0.00796355	0.393182	0.171488
197	0.057566	1357.4	Rep (u*D)	Fr	0.307998	1.2555	0.202096	0.130714					197	0.0630863	1336.26	h/D50	Fr	21.583	0.00796355	0.171488	0.393182
198	0.0517158	1367.63	Cref	Rep (u*D)	0.878061	0.478346	0.0327559	0.214843					198	0.0579106	1348.62	Rep (u*D)	tau_sk	1.11097	0.307374	0.127527	-0.131313
199	0.0517158	1367.63	Rep (u*D)	Cref	0.878061	0.478346	0.214843	0.0327559					199	0.0579106	1348.62	tau_sk	Rep (u*D)	1.11097	0.307374	-0.131313	0.127527
200	0.0494048	1364.69	di	Rep	1.02133	0.898059	0.0720922	-0.0476973					200	0.0573303	1357.05	Fr	Rep (u*D)	0.545415	0.722216	0.132508	0.199334
201	0.0494048	1364.69	Rep	di	1.02133	0.898059	-0.0476973	0.0720922					201	0.0573303	1357.05	Rep (u*D)	Fr	0.545415	0.722216	0.199334	0.132508
202	0.0459512	1372.01	Rep (u*D)	S	0.207231	0.980561	0.194576	-0.0436993					202	0.0451883	1361.35	Rep	tau_sk	2.7343	0.170887	-0.0577043	-0.18225
203	0.0459512	1372.01	S	Rep (u*D)	0.207231	0.980561	-0.0436993	0.194576					203	0.0451883	1361.35	tau_sk	Rep	2.7343	0.170887	-0.18225	-0.0577043
204	0.0457368	1362.16	tau_sk	Rep	0.416645	1.10615	-0.169323	-0.0468763					204	0.0515092	1367.32	Cref	Rep (u*D)	0.688718	0.616318	0.0319563	0.209688
205	0.0457368	1362.16	Rep	tau_sk	0.416645	1.10615	-0.0468763	-0.169323					205	0.0515092	1367.32	Rep (u*D)	Cref	0.688718	0.616318	0.209688	0.0319563
206	0.0408029	1373.52	h/D50	tau_sk	1.10537	0.439435	-0.00965016	-0.158108					206	0.0457206	1371.68	Rep (u*D)	S	0.983094	0.199901	0.193895	-0.0481278
207	0.0408029	1373.52	tau_sk	h/D50	1.10537	0.439435	-0.158108	-0.00965016					207	0.0457206	1371.68	S	Rep (u*D)	0.983094	0.199901	-0.0481278	0.193895
208	0.0405666	1373.54	S	tau_sk	1.19232	0.396561	0.00750666	-0.157558					208	0.0404602	1373.02	h/D50	tau_sk	0.676552	0.697913	-0.0064224	-0.16586
209	0.0405666	1373.54	tau_sk	S	1.19232	0.396561	-0.157558	0.00750666					209	0.0404602	1373.02	tau_sk	h/D50	0.676552	0.697913	-0.16586	-0.0064224
210	0.0387253	1383.92	h/D50	Rep (u*D)	1.08382	0.238198	0.0201822	0.179721					210	0.0402673	1373.1	S	tau_sk	1.25358	0.373538	0.00604495	-0.166272
211	0.0387253	1383.92	Rep (u*D)	h/D50	1.08382	0.238198	0.179721	0.0201822					211	0.0402673	1373.1	tau_sk	S	1.25358	0.373538	-0.166272	0.00604495
212	0.0279366	1400.17	Cref/S	Rep	0.603749	0.787382	0.0774316	0.0826822					212	0.0384896	1383.57	h/D50	Rep (u*D)	0.205482	1.22115	0.0241824	0.177388
213	0.0279366	1400.17	Rep	Cref/S	0.603749	0.787382	0.0826822	0.0774316					213	0.0384896	1383.57	Rep (u*D)	h/D50	0.205482	1.22115	0.177388	0.0241824
214	0.0252524	1397.43	Cref/S	Cref	1.35304	0.255943	0.0901668	-0.0387837					214	0.0249342	1396.97	Cref/S	S	0.1582	2.10831	0.0556242	-0.0439821
215	0.0252524	1397.43	Cref	Cref/S	1.35304	0.255943	-0.0387837	0.0901668					215	0.0249342	1396.97	S	Cref/S	0.1582	2.10831	-0.0439821	0.0556242
216	0.0252524	1397.43	Cref	S	0.546239	0.63404	0.0513961	-0.0901746					216	0.0249337	1396.97	Cref/S	Cref	0.769305	0.433552	0.0996164	-0.0439834
217	0.0252524	1397.43	S	Cref	0.546239	0.63404	-0.0901746	0.0513961					217	0.0249337	1396.97	Cref	Cref/S	0.769305	0.433552	-0.0439834	0.0996164
218	0.0226006	1401.66	Cref/S	h/D50	2.0503	0.180106	0.0510594	0.0296996					218	0.0249326	1396.97	S	Cref	0.590015	0.565209	-0.0996276	0.0556259
219	0.0226006	1401.66	h/D50	Cref/S	2.0503	0.180106	0.0296996	0.0510594					219	0.0249326	1396.97	Cref	S	0.590015	0.565209	0.0556259	-0.0996276
220	0.0195969	1408.84	Cref/S	Fr	0.826951	0.645229	0.0359135	0.0465614					220	0.0275463	1399.61	Cref/S	Rep	0.590883	0.818342	0.0769056	0.0718761
221	0.0195969	1408.84	Fr	Cref/S	0.826951	0.645229	0.0465614	0.0359135					221	0.0275463	1399.61	Rep	Cref/S	0.590883	0.818342	0.0718761	0.0769056
222	0.0171062	1414.08	Cref	Fr	0.767423	0.606682	-0.0352381	0.204669					222	0.0222549	1401.16	Cref/S	h/D50	0.395531	0.893866	0.0554053	0.0351431
223	0.0171062	1414.08	Fr	Cref	0.767423	0.606682	0.204669	-0.0352381					223	0.0222549	1401.16	h/D50	Cref/S	0.395531	0.893866	0.0351431	0.0554053
224	0.017089	1410.58	Cref	h/D50	0.987123	0.382604	0.0430088	0.0663472					224	0.0193762	1408.51	Cref/S	Fr	0.828425	0.648922	0.0399177	0.0439352
225	0.017089	1410.58	h/D50	Cref	0.987123	0.382604	0.0663472	0.0430088					225	0.0193762	1408.51	Fr	Cref/S	0.828425	0.648922	0.0439352	0.0399177
226	0.0124532	1421.97	Fr	Rep	0.693703	0.801819	0.10131	0.00993271					226	0.0167785	1410.13	Cref	h/D50	0.823767	0.439591	0.0466681	0.074965
227	0.0124532	1421.97	Rep	Fr	0.693703	0.801819	0.00993271	0.10131					227	0.0167785	1410.13	h/D50	Cref	0.823767	0.439591	0.074965	0.0466681
228	0.0070122	1429.45	h/D50	S	0.557871	0.673389	-0.0729286	-0.100857					228	0.016913	1413.8	Cref	Fr	0.908873	0.515	-0.036683	0.211436
229	0.0070122	1429.45	S	h/D50	0.557871	0.673389	-0.100857	-0.0729286					229	0.016913	1413.8	Fr	Cref	0.908873	0.515	0.211436	-0.036683
230	0.00395106	1432.68	Rep	S	0.93493	0.383419	-0.000913989	-0.0274838					230	0.012118	1421.47	Fr	Rep	0.732815	0.771303	0.101109	0.00152611
231	0.00395106	1432.68	S	Rep	0.93493	0.383419	-0.0274838	-0.000913989					231	0.012118	1421.47	Rep	Fr	0.732815	0.771303	0.00152611	0.101109
232	0.00379045	1435.12	Cref	Rep	1.22985	0.447856	0.0163948	0.00720124					232	0.00606661	1429.69	h/D50	S	0.618748	0.574692	-0.0359944	-0.0675534
233	0.00379045	1435.12	Rep	Cref	1.22985	0.447856	0.00720124	0.0163948					233	0.00606661	1429.69	S	h/D50	0.618748	0.574692	-0.0675534	-0.0359944
234	0.00182961	1436.01	h/D50	Rep	0.422495	0.927825	0.0171031	-0.00426124					234	0.00358178	1432.14	Rep	S	0.68108	0.518011	-0.0092607	-0.0307266
235	0.00182961	1436.01	Rep	h/D50	0.422495	0.927825	-0.00426124	0.0171031					235	0.00358178	1432.14	S	Rep	0.68108	0.518011	-0.0307266	-0.0092607
236	0	65535	tau	tau	0	0	0	0					236	0.00343756	1434.61	Cref	Rep	1.613	0.342335	0.0150335	-0.00299032
237	0	65535	tau_sk	tau_sk	0	0	0	0					237	0.00343756	1434.61	Rep	Cref	1.613	0.342335	-0.00299032	0.0150335
238	0	65535	u*/ws	u*/ws	0	0	0	0					238	0.0014336	1435.44	h/D50	Rep	0.00203142	188.502	0.0208639	-0.0125697
239	0	65535	u*_sk/ws	u*_sk/ws	0	0	0	0					239	0.0014336	1435.44	Rep	h/D50	0.00203142	188.502	-0.0125697	0.0208639
240	0	65535	S	S	0	0	0	0					240	0	65535	tau	tau	0	0	0	0
241	0	1445.1	Cref/S	S	0.788675	0.901988	0.0621962	0.0344716					241	0	65535	tau_sk	tau_sk	0	0	0	0
242	0	65535	Cf	Cf	0	0	0	0					242	0	65535	u*/ws	u*/ws	0	0	0	0
243	0	1535.75	h/D50	Cf	1.00966	0.993955	-0.0536607	0.0357551					243	0	65535	u*_sk/ws	u*_sk/ws	0	0	0	0
244	0	65535	Rep	Rep	0	0	0	0					244	0	65535	S	S	0	0	0	0
245	0	65535	Rep (u*D)	Rep (u*D)	0	0	0	0					245	0	65535	Cf	Cf	0	0	0	0
246	0	65535	Rep (u*_sk D)	Rep (u*_sk D)	0	0	0	0					246	0	65535	Rep	Rep	0	0	0	0
247	0	1535.75	Cf	h/D50	1.00966	0.993955	0.0357551	-0.0536607					247	0	65535	Rep (u*D)	Rep (u*D)	0	0	0	0
248	0	65535	h/D50	h/D50	0	0	0	0					248	0	65535	Rep (u*_sk D)	Rep (u*_sk D)	0	0	0	0
249	0	65535	h/Kc	h/Kc	0	0	0	0					249	0	65535	h/D50	h/D50	0	0	0	0
250	0	65535	Fr	Fr	0	0	0	0					250	0	65535	h/Kc	h/Kc	0	0	0	0
251	0	65535	did50	did50	0	0	0	0					251	0	65535	Fr	Fr	0	0	0	0
252	0	65535	Cref/S	did50	1.31213	0.462455	-0.00022281	0.688455					252	0	65535	did50	did50	0	0	0	0
253	0	65535	di	di	0	0	0	0					253	0	65535	tau_sk	di	88.5591	1.02489	0.00617765	0.591411
254	0	65535	Cref	Cref	0	0	0	0					254	0	65535	di	di	0	0	0	0
255	0	1445.1	S	Cref/S	0.788675	0.901988	0.0344716	0.0621962					255	0	65535	Cref	Cref	0	0	0	0
256	0	65535	Cref/S	Cref/S	0	0	0	0					256	0	65535	Cref/S	Cref/S	0	0	0	0

## Sheet: Entrainment_3parameter
Least squares fit													York fit
ranking	rsquared	A	parameter1	parameter2	parameter3	coeff_p1	coeff_p2	coeff_p3	exp_p1	exp_p2	exp_p3		ranking	rsquared	A	parameter1	parameter2	parameter3	coeff_p1	coeff_p2	coeff_p3	exp_p1	exp_p2	exp_p3
1	0.800254	2751.59	did50	h/D50	u*_sk/ws	0.0976234	343.753	0.000102609	1.09763	-0.452139	2.46948		1	0.800196	2750.74	did50	h/D50	u*_sk/ws	16.7767	1.92074	0.000107915	1.06618	-0.452794	2.45372
2	0.800254	2751.59	h/D50	did50	u*_sk/ws	0.0976234	343.753	0.000102609	-0.452139	1.09763	2.46948		2	0.800196	2750.74	h/D50	did50	u*_sk/ws	16.7767	1.92074	0.000107915	-0.452794	1.06618	2.45372
3	0.800254	2751.59	did50	u*_sk/ws	h/D50	0.0976234	343.753	0.000102609	1.09763	2.46948	-0.452139		3	0.800196	2750.74	did50	u*_sk/ws	h/D50	16.7767	1.92074	0.000107915	1.06618	2.45372	-0.452794
4	0.800254	2751.59	u*_sk/ws	did50	h/D50	0.0976234	343.753	0.000102609	2.46948	1.09763	-0.452139		4	0.800196	2750.74	u*_sk/ws	did50	h/D50	16.7767	1.92074	0.000107915	2.45372	1.06618	-0.452794
5	0.800254	2751.59	h/D50	u*_sk/ws	did50	0.0976234	343.753	0.000102609	-0.452139	2.46948	1.09763		5	0.800196	2750.74	h/D50	u*_sk/ws	did50	16.7767	1.92074	0.000107915	-0.452794	2.45372	1.06618
6	0.800254	2751.59	u*_sk/ws	h/D50	did50	0.0976234	343.753	0.000102609	2.46948	-0.452139	1.09763		6	0.800196	2750.74	u*_sk/ws	h/D50	did50	16.7767	1.92074	0.000107915	2.45372	-0.452794	1.06618
7	0.799003	2776.8	Fr	Rep (u*D)	u*/ws	1.51746e-06	3509.81	1.07622	1.59423	-0.860385	1.30818		7	0.797666	2796.15	Rep	u*/ws	Fr	4.93835e-05	3.01644e+14	8.01195e-14	-0.50829	1.43735	1.56371
8	0.799003	2776.8	Rep (u*D)	Fr	u*/ws	1.51746e-06	3509.81	1.07622	-0.860385	1.59423	1.30818		8	0.797666	2796.15	u*/ws	Rep	Fr	4.93835e-05	3.01644e+14	8.01195e-14	1.43735	-0.50829	1.56371
9	0.799003	2776.8	Fr	u*/ws	Rep (u*D)	1.51746e-06	3509.81	1.07622	1.59423	1.30818	-0.860385		9	0.797666	2796.15	Fr	Rep	u*/ws	4.93835e-05	3.01644e+14	8.01195e-14	1.56371	-0.50829	1.43735
10	0.799003	2776.8	u*/ws	Fr	Rep (u*D)	1.51746e-06	3509.81	1.07622	1.30818	1.59423	-0.860385		10	0.797666	2796.15	Rep	Fr	u*/ws	4.93835e-05	3.01644e+14	8.01195e-14	-0.50829	1.56371	1.43735
11	0.799003	2776.8	Rep (u*D)	u*/ws	Fr	1.51746e-06	3509.81	1.07622	-0.860385	1.30818	1.59423		11	0.797666	2796.15	u*/ws	Fr	Rep	4.93835e-05	3.01644e+14	8.01195e-14	1.43735	1.56371	-0.50829
12	0.799003	2776.8	u*/ws	Rep (u*D)	Fr	1.51746e-06	3509.81	1.07622	1.30818	-0.860385	1.59423		12	0.797666	2796.15	Fr	u*/ws	Rep	4.93835e-05	3.01644e+14	8.01195e-14	1.56371	1.43735	-0.50829
13	0.797742	2797.24	Fr	Rep	u*/ws	9.8976e-08	7.12205e+19	1.77449e-16	1.56247	-0.524055	1.41822		13	0.795627	2847.81	did50	Fr	Rep	7.21306	615.963	2.44861e-06	-1.78771	1.49513	-1.11096
14	0.797742	2797.24	Rep	Fr	u*/ws	9.8976e-08	7.12205e+19	1.77449e-16	-0.524055	1.56247	1.41822		14	0.795627	2847.81	Fr	did50	Rep	7.21306	615.963	2.44861e-06	1.49513	-1.78771	-1.11096
15	0.797742	2797.24	Fr	u*/ws	Rep	9.8976e-08	7.12205e+19	1.77449e-16	1.56247	1.41822	-0.524055		15	0.795627	2847.81	did50	Rep	Fr	7.21306	615.963	2.44861e-06	-1.78771	-1.11096	1.49513
16	0.797742	2797.24	u*/ws	Fr	Rep	9.8976e-08	7.12205e+19	1.77449e-16	1.41822	1.56247	-0.524055		16	0.795627	2847.81	Rep	did50	Fr	7.21306	615.963	2.44861e-06	-1.11096	-1.78771	1.49513
17	0.797742	2797.24	Rep	u*/ws	Fr	9.8976e-08	7.12205e+19	1.77449e-16	-0.524055	1.41822	1.56247		17	0.795627	2847.81	Fr	Rep	did50	7.21306	615.963	2.44861e-06	1.49513	-1.11096	-1.78771
18	0.797742	2797.24	u*/ws	Rep	Fr	9.8976e-08	7.12205e+19	1.77449e-16	1.41822	-0.524055	1.56247		18	0.795627	2847.81	Rep	Fr	did50	7.21306	615.963	2.44861e-06	-1.11096	1.49513	-1.78771
19	0.795721	2849.17	did50	Fr	Rep	3.34368	596.64	5.62948e-06	-1.76814	1.49843	-1.1204		19	0.792083	2864.54	u*_sk/ws	tau_sk	Fr	1.43763	0.00124369	0.259235	1.87575	-0.160427	1.25996
20	0.795721	2849.17	Fr	did50	Rep	3.34368	596.64	5.62948e-06	1.49843	-1.76814	-1.1204		20	0.792083	2864.54	tau_sk	u*_sk/ws	Fr	1.43763	0.00124369	0.259235	-0.160427	1.87575	1.25996
21	0.795721	2849.17	did50	Rep	Fr	3.34368	596.64	5.62948e-06	-1.76814	-1.1204	1.49843		21	0.792083	2864.54	Fr	u*_sk/ws	tau_sk	1.43763	0.00124369	0.259235	1.25996	1.87575	-0.160427
22	0.795721	2849.17	Rep	did50	Fr	3.34368	596.64	5.62948e-06	-1.1204	-1.76814	1.49843		22	0.792083	2864.54	u*_sk/ws	Fr	tau_sk	1.43763	0.00124369	0.259235	1.87575	1.25996	-0.160427
23	0.795721	2849.17	Fr	Rep	did50	3.34368	596.64	5.62948e-06	1.49843	-1.1204	-1.76814		23	0.792083	2864.54	tau_sk	Fr	u*_sk/ws	1.43763	0.00124369	0.259235	-0.160427	1.25996	1.87575
24	0.795721	2849.17	Rep	Fr	did50	3.34368	596.64	5.62948e-06	-1.1204	1.49843	-1.76814		24	0.792083	2864.54	Fr	tau_sk	u*_sk/ws	1.43763	0.00124369	0.259235	1.25996	-0.160427	1.87575
25	0.79358	2841.04	did50	Fr	u*_sk/ws	1.71946	0.000286286	0.755375	0.304719	1.08097	1.92267		25	0.790692	2877.96	Cf	S	u*_sk/ws	3.21561e-09	0.000685239	1.37843e+08	-0.645906	0.575222	1.76251
26	0.79358	2841.04	Fr	did50	u*_sk/ws	1.71946	0.000286286	0.755375	1.08097	0.304719	1.92267		26	0.790692	2877.96	S	Cf	u*_sk/ws	3.21561e-09	0.000685239	1.37843e+08	0.575222	-0.645906	1.76251
27	0.79358	2841.04	did50	u*_sk/ws	Fr	1.71946	0.000286286	0.755375	0.304719	1.92267	1.08097		27	0.790692	2877.96	Cf	u*_sk/ws	S	3.21561e-09	0.000685239	1.37843e+08	-0.645906	1.76251	0.575222
28	0.79358	2841.04	u*_sk/ws	did50	Fr	1.71946	0.000286286	0.755375	1.92267	0.304719	1.08097		28	0.790692	2877.96	S	u*_sk/ws	Cf	3.21561e-09	0.000685239	1.37843e+08	0.575222	1.76251	-0.645906
29	0.79358	2841.04	Fr	u*_sk/ws	did50	1.71946	0.000286286	0.755375	1.08097	1.92267	0.304719		29	0.790692	2877.96	u*_sk/ws	S	Cf	3.21561e-09	0.000685239	1.37843e+08	1.76251	0.575222	-0.645906
30	0.79358	2841.04	u*_sk/ws	Fr	did50	1.71946	0.000286286	0.755375	1.92267	1.08097	0.304719		30	0.790692	2877.96	u*_sk/ws	Cf	S	3.21561e-09	0.000685239	1.37843e+08	1.76251	-0.645906	0.575222
31	0.790713	2878.26	Cf	S	u*_sk/ws	7.35213e-14	4.80959e-05	8.29662e+13	-0.655433	0.576157	1.7541		31	0.790692	2877.96	Fr	Cf	u*_sk/ws	0.00323536	0.603035	0.155683	1.15046	-0.0706826	1.76252
32	0.790713	2878.26	S	Cf	u*_sk/ws	7.35213e-14	4.80959e-05	8.29662e+13	0.576157	-0.655433	1.7541		32	0.790692	2877.96	Cf	Fr	u*_sk/ws	0.00323536	0.603035	0.155683	-0.0706826	1.15046	1.76252
33	0.790713	2878.26	Cf	u*_sk/ws	S	7.35213e-14	4.80959e-05	8.29662e+13	-0.655433	1.7541	0.576157		33	0.790692	2877.96	u*_sk/ws	Fr	Cf	0.00323536	0.603035	0.155683	1.76252	1.15046	-0.0706826
34	0.790713	2878.26	u*_sk/ws	Cf	S	7.35213e-14	4.80959e-05	8.29662e+13	1.7541	-0.655433	0.576157		34	0.790692	2877.96	Cf	u*_sk/ws	Fr	0.00323536	0.603035	0.155683	-0.0706826	1.76252	1.15046
35	0.790713	2878.26	S	u*_sk/ws	Cf	7.35213e-14	4.80959e-05	8.29662e+13	0.576157	1.7541	-0.655433		35	0.790692	2877.96	u*_sk/ws	Cf	Fr	0.00323536	0.603035	0.155683	1.76252	-0.0706826	1.15046
36	0.790713	2878.26	u*_sk/ws	S	Cf	7.35213e-14	4.80959e-05	8.29662e+13	1.7541	0.576157	-0.655433		36	0.790692	2877.96	Fr	u*_sk/ws	Cf	0.00323536	0.603035	0.155683	1.15046	1.76252	-0.0706826
37	0.790713	2878.26	Fr	S	u*_sk/ws	0.000242057	14.4141	0.0840875	1.31088	-0.0792754	1.7541		37	0.790691	2877.96	Fr	h/Kc	u*_sk/ws	0.0184569	0.66148	0.0335533	1.15044	0.0235553	1.76254
38	0.790713	2878.26	S	Fr	u*_sk/ws	0.000242057	14.4141	0.0840875	-0.0792754	1.31088	1.7541		38	0.790691	2877.96	h/Kc	Fr	u*_sk/ws	0.0184569	0.66148	0.0335533	0.0235553	1.15044	1.76254
39	0.790713	2878.26	Fr	u*_sk/ws	S	0.000242057	14.4141	0.0840875	1.31088	1.7541	-0.0792754		39	0.790691	2877.96	Fr	u*_sk/ws	h/Kc	0.0184569	0.66148	0.0335533	1.15044	1.76254	0.0235553
40	0.790713	2878.26	u*_sk/ws	Fr	S	0.000242057	14.4141	0.0840875	1.7541	1.31088	-0.0792754		40	0.790691	2877.96	u*_sk/ws	Fr	h/Kc	0.0184569	0.66148	0.0335533	1.76254	1.15044	0.0235553
41	0.790713	2878.26	S	u*_sk/ws	Fr	0.000242057	14.4141	0.0840875	-0.0792754	1.7541	1.31088		41	0.790691	2877.96	h/Kc	u*_sk/ws	Fr	0.0184569	0.66148	0.0335533	0.0235553	1.76254	1.15044
42	0.790713	2878.26	u*_sk/ws	S	Fr	0.000242057	14.4141	0.0840875	1.7541	-0.0792754	1.31088		42	0.790691	2877.96	u*_sk/ws	h/Kc	Fr	0.0184569	0.66148	0.0335533	1.76254	0.0235553	1.15044
43	0.790713	2878.26	Fr	Cf	u*_sk/ws	0.00155746	0.700883	0.268749	1.15231	-0.0792808	1.75409		43	0.790119	2886.01	Fr	u*_sk/ws	tau	0.00570365	0.338147	0.245029	1.1758	1.79644	-0.0413881
44	0.790713	2878.26	Cf	Fr	u*_sk/ws	0.00155746	0.700883	0.268749	-0.0792808	1.15231	1.75409		44	0.790119	2886.01	u*_sk/ws	Fr	tau	0.00570365	0.338147	0.245029	1.79644	1.1758	-0.0413881
45	0.790713	2878.26	Fr	u*_sk/ws	Cf	0.00155746	0.700883	0.268749	1.15231	1.75409	-0.0792808		45	0.790119	2886.01	Fr	tau	u*_sk/ws	0.00570365	0.338147	0.245029	1.1758	-0.0413881	1.79644
46	0.790713	2878.26	u*_sk/ws	Fr	Cf	0.00155746	0.700883	0.268749	1.75409	1.15231	-0.0792808		46	0.790119	2886.01	tau	Fr	u*_sk/ws	0.00570365	0.338147	0.245029	-0.0413881	1.1758	1.79644
47	0.790713	2878.26	Cf	u*_sk/ws	Fr	0.00155746	0.700883	0.268749	-0.0792808	1.75409	1.15231		47	0.790119	2886.01	u*_sk/ws	tau	Fr	0.00570365	0.338147	0.245029	1.79644	-0.0413881	1.1758
48	0.790713	2878.26	u*_sk/ws	Cf	Fr	0.00155746	0.700883	0.268749	1.75409	-0.0792808	1.15231		48	0.790119	2886.01	tau	u*_sk/ws	Fr	0.00570365	0.338147	0.245029	-0.0413881	1.79644	1.1758
49	0.790713	2878.26	Fr	h/Kc	u*_sk/ws	0.000862415	152.859	0.0031126	1.1523	0.0264293	1.7541		49	0.789591	2890.47	Fr	u*_sk/ws	u*_sk/ws	0.00607518	0.00894014	8.54881	1.17374	1.8275	-0.0463186
50	0.790713	2878.26	h/Kc	Fr	u*_sk/ws	0.000862415	152.859	0.0031126	0.0264293	1.1523	1.7541		50	0.789591	2890.47	u*_sk/ws	Fr	u*_sk/ws	0.00607518	0.00894014	8.54881	1.8275	1.17374	-0.0463186
51	0.790713	2878.26	Fr	u*_sk/ws	h/Kc	0.000862415	152.859	0.0031126	1.1523	1.7541	0.0264293		51	0.789591	2890.47	u*_sk/ws	u*_sk/ws	Fr	0.00607518	0.00894014	8.54881	1.8275	-0.0463186	1.17374
52	0.790713	2878.26	u*_sk/ws	Fr	h/Kc	0.000862415	152.859	0.0031126	1.7541	1.1523	0.0264293		52	0.789558	2890.75	Fr	u*_sk/ws	Fr	0.967131	0.002098	0.223407	1.09248	1.78125	0.0691288
53	0.790713	2878.26	h/Kc	u*_sk/ws	Fr	0.000862415	152.859	0.0031126	0.0264293	1.7541	1.1523		53	0.789558	2890.75	u*_sk/ws	Fr	Fr	0.967131	0.002098	0.223407	1.78125	1.09248	0.0691288
54	0.790713	2878.26	u*_sk/ws	h/Kc	Fr	0.000862415	152.859	0.0031126	1.7541	0.0264293	1.1523		54	0.789558	2890.75	Fr	Fr	u*_sk/ws	0.967131	0.002098	0.223407	1.09248	0.0691288	1.78125
55	0.790713	2878.26	S	h/Kc	u*_sk/ws	0.437199	0.0951377	0.113025	0.576159	0.218475	1.75414		55	0.789634	2892.6	h/Kc	u*_sk/ws	S	0.363336	0.0562739	0.151976	0.205507	1.76999	0.529009
56	0.790713	2878.26	h/Kc	S	u*_sk/ws	0.437199	0.0951377	0.113025	0.218475	0.576159	1.75414		56	0.789634	2892.6	u*_sk/ws	S	h/Kc	0.363336	0.0562739	0.151976	1.76999	0.529009	0.205507
57	0.790713	2878.26	h/Kc	u*_sk/ws	S	0.437199	0.0951377	0.113025	0.218475	1.75414	0.576159		57	0.789634	2892.6	h/Kc	S	u*_sk/ws	0.363336	0.0562739	0.151976	0.205507	0.529009	1.76999
58	0.790713	2878.26	u*_sk/ws	h/Kc	S	0.437199	0.0951377	0.113025	1.75414	0.218475	0.576159		58	0.789634	2892.6	S	h/Kc	u*_sk/ws	0.363336	0.0562739	0.151976	0.529009	0.205507	1.76999
59	0.790713	2878.26	S	u*_sk/ws	h/Kc	0.437199	0.0951377	0.113025	0.576159	1.75414	0.218475		59	0.789634	2892.6	u*_sk/ws	h/Kc	S	0.363336	0.0562739	0.151976	1.76999	0.205507	0.529009
60	0.790713	2878.26	u*_sk/ws	S	h/Kc	0.437199	0.0951377	0.113025	1.75414	0.576159	0.218475		60	0.789634	2892.6	S	u*_sk/ws	h/Kc	0.363336	0.0562739	0.151976	0.529009	1.76999	0.205507
61	0.790603	2890.53	Fr	u*_sk/ws	tau_sk	3.38419	0.000299663	0.372266	1.17929	1.89719	-0.211829		61	0.790011	2896.75	Fr	Rep (u*D)	u*/ws	4.31928e-05	122.58	0.732517	1.82729	-0.596008	1.47575
62	0.790603	2890.53	u*_sk/ws	Fr	tau_sk	3.38419	0.000299663	0.372266	1.89719	1.17929	-0.211829		62	0.790011	2896.75	Fr	u*/ws	Rep (u*D)	4.31928e-05	122.58	0.732517	1.82729	1.47575	-0.596008
63	0.790603	2890.53	Fr	tau_sk	u*_sk/ws	3.38419	0.000299663	0.372266	1.17929	-0.211829	1.89719		63	0.790011	2896.75	Rep (u*D)	u*/ws	Fr	4.31928e-05	122.58	0.732517	-0.596008	1.47575	1.82729
64	0.790603	2890.53	tau_sk	Fr	u*_sk/ws	3.38419	0.000299663	0.372266	-0.211829	1.17929	1.89719		64	0.790011	2896.75	Rep (u*D)	Fr	u*/ws	4.31928e-05	122.58	0.732517	-0.596008	1.82729	1.47575
65	0.790603	2890.53	u*_sk/ws	tau_sk	Fr	3.38419	0.000299663	0.372266	1.89719	-0.211829	1.17929		65	0.790011	2896.75	u*/ws	Fr	Rep (u*D)	4.31928e-05	122.58	0.732517	1.47575	1.82729	-0.596008
66	0.790603	2890.53	tau_sk	u*_sk/ws	Fr	3.38419	0.000299663	0.372266	-0.211829	1.89719	1.17929		66	0.790011	2896.75	u*/ws	Rep (u*D)	Fr	4.31928e-05	122.58	0.732517	1.47575	-0.596008	1.82729
67	0.790166	2886.69	u*_sk/ws	Fr	tau	0.0038648	0.419639	0.297847	1.79632	1.18108	-0.05634		67	0.788574	2904.05	Fr	u*_sk/ws	u*/ws	0.00214815	0.0237959	9.70402	1.24231	1.66809	0.118379
68	0.790166	2886.69	Fr	tau	u*_sk/ws	0.0038648	0.419639	0.297847	1.18108	-0.05634	1.79632		68	0.788574	2904.05	u*_sk/ws	Fr	u*/ws	0.00214815	0.0237959	9.70402	1.66809	1.24231	0.118379
69	0.790166	2886.69	tau	Fr	u*_sk/ws	0.0038648	0.419639	0.297847	-0.05634	1.18108	1.79632		69	0.788574	2904.05	Fr	u*/ws	u*_sk/ws	0.00214815	0.0237959	9.70402	1.24231	0.118379	1.66809
70	0.790166	2886.69	tau	u*_sk/ws	Fr	0.0038648	0.419639	0.297847	-0.05634	1.79632	1.18108		70	0.788574	2904.05	u*/ws	Fr	u*_sk/ws	0.00214815	0.0237959	9.70402	0.118379	1.24231	1.66809
71	0.790166	2886.69	Fr	u*_sk/ws	tau	0.0038648	0.419639	0.297847	1.18108	1.79632	-0.05634		71	0.788574	2904.05	u*_sk/ws	u*/ws	Fr	0.00214815	0.0237959	9.70402	1.66809	0.118379	1.24231
72	0.790166	2886.69	u*_sk/ws	tau	Fr	0.0038648	0.419639	0.297847	1.79632	-0.05634	1.18108		72	0.788574	2904.05	u*/ws	u*_sk/ws	Fr	0.00214815	0.0237959	9.70402	0.118379	1.66809	1.24231
73	0.789662	2890.18	Fr	h/D50	u*_sk/ws	60.5602	1.30373e-05	0.534555	1.21184	0.0180472	1.76723		73	0.788832	2914.25	u*_sk/ws	h/D50	Rep	3723.95	3.75981e-07	13.091	1.54423	-0.495067	-0.558174
74	0.789662	2890.18	Fr	u*_sk/ws	h/D50	60.5602	1.30373e-05	0.534555	1.21184	1.76723	0.0180472		74	0.788832	2914.25	Rep	u*_sk/ws	h/D50	3723.95	3.75981e-07	13.091	-0.558174	1.54423	-0.495067
75	0.789662	2890.18	u*_sk/ws	Fr	h/D50	60.5602	1.30373e-05	0.534555	1.76723	1.21184	0.0180472		75	0.788832	2914.25	h/D50	Rep	u*_sk/ws	3723.95	3.75981e-07	13.091	-0.495067	-0.558174	1.54423
76	0.789662	2890.18	u*_sk/ws	h/D50	Fr	60.5602	1.30373e-05	0.534555	1.76723	0.0180472	1.21184		76	0.788832	2914.25	Rep	h/D50	u*_sk/ws	3723.95	3.75981e-07	13.091	-0.558174	-0.495067	1.54423
77	0.789662	2890.18	h/D50	Fr	u*_sk/ws	60.5602	1.30373e-05	0.534555	0.0180472	1.21184	1.76723		77	0.788832	2914.25	h/D50	u*_sk/ws	Rep	3723.95	3.75981e-07	13.091	-0.495067	1.54423	-0.558174
78	0.789662	2890.18	h/D50	u*_sk/ws	Fr	60.5602	1.30373e-05	0.534555	0.0180472	1.76723	1.21184		78	0.788832	2914.25	u*_sk/ws	Rep	h/D50	3723.95	3.75981e-07	13.091	1.54423	-0.558174	-0.495067
79	0.789603	2890.65	Fr	u*_sk/ws	u*_sk/ws	0.00956996	0.28805	0.1718	1.17953	0.371296	1.40215		79	0.787583	2919.63	Fr	h/Kc	u*/ws	1.8228e-06	8.23679e+22	1.53107e-21	1.62195	0.165119	1.73997
80	0.789603	2890.65	u*_sk/ws	Fr	u*_sk/ws	0.00956996	0.28805	0.1718	0.371296	1.17953	1.40215		80	0.787583	2919.63	h/Kc	Fr	u*/ws	1.8228e-06	8.23679e+22	1.53107e-21	0.165119	1.62195	1.73997
81	0.789603	2890.65	u*_sk/ws	u*_sk/ws	Fr	0.00956996	0.28805	0.1718	0.371296	1.40215	1.17953		81	0.787583	2919.63	Fr	u*/ws	h/Kc	1.8228e-06	8.23679e+22	1.53107e-21	1.62195	1.73997	0.165119
82	0.789603	2890.65	Fr	Fr	u*_sk/ws	0.638233	0.000803824	0.923135	1.77975	-0.600237	1.77343		82	0.787583	2919.63	u*/ws	Fr	h/Kc	1.8228e-06	8.23679e+22	1.53107e-21	1.73997	1.62195	0.165119
83	0.789603	2890.65	Fr	u*_sk/ws	Fr	0.638233	0.000803824	0.923135	1.77975	1.77343	-0.600237		83	0.787583	2919.63	u*/ws	h/Kc	Fr	1.8228e-06	8.23679e+22	1.53107e-21	1.73997	0.165119	1.62195
84	0.789603	2890.65	u*_sk/ws	Fr	Fr	0.638233	0.000803824	0.923135	1.77343	1.77975	-0.600237		84	0.787583	2919.63	h/Kc	u*/ws	Fr	1.8228e-06	8.23679e+22	1.53107e-21	0.165119	1.73997	1.62195
85	0.788939	2915.83	h/D50	Rep	u*_sk/ws	5322.54	2.36074e-09	1518.31	-0.494022	-0.581577	1.52752		85	0.787583	2919.63	Fr	S	u*/ws	20644.4	1.42704e-06	0.000958708	2.61267	-0.495369	1.73996
86	0.788939	2915.83	Rep	h/D50	u*_sk/ws	5322.54	2.36074e-09	1518.31	-0.581577	-0.494022	1.52752		86	0.787583	2919.63	S	Fr	u*/ws	20644.4	1.42704e-06	0.000958708	-0.495369	2.61267	1.73996
87	0.788939	2915.83	h/D50	u*_sk/ws	Rep	5322.54	2.36074e-09	1518.31	-0.494022	1.52752	-0.581577		87	0.787583	2919.63	Fr	u*/ws	S	20644.4	1.42704e-06	0.000958708	2.61267	1.73996	-0.495369
88	0.788939	2915.83	Rep	u*_sk/ws	h/D50	5322.54	2.36074e-09	1518.31	-0.581577	1.52752	-0.494022		88	0.787583	2919.63	u*/ws	Fr	S	20644.4	1.42704e-06	0.000958708	1.73996	2.61267	-0.495369
89	0.788939	2915.83	u*_sk/ws	Rep	h/D50	5322.54	2.36074e-09	1518.31	1.52752	-0.581577	-0.494022		89	0.787583	2919.63	S	u*/ws	Fr	20644.4	1.42704e-06	0.000958708	-0.495369	1.73996	2.61267
90	0.788939	2915.83	u*_sk/ws	h/D50	Rep	5322.54	2.36074e-09	1518.31	1.52752	-0.494022	-0.581577		90	0.787583	2919.63	u*/ws	S	Fr	20644.4	1.42704e-06	0.000958708	1.73996	-0.495369	2.61267
91	0.788727	2902.55	Fr	u*_sk/ws	u*/ws	0.00103455	0.607011	0.807389	1.24285	1.679	0.0981576		91	0.787583	2919.63	Cf	S	u*/ws	0.0307204	12.019	7.64935e-05	-1.30635	0.810976	1.73997
92	0.788727	2902.55	Fr	u*/ws	u*_sk/ws	0.00103455	0.607011	0.807389	1.24285	0.0981576	1.679		92	0.787583	2919.63	S	Cf	u*/ws	0.0307204	12.019	7.64935e-05	0.810976	-1.30635	1.73997
93	0.788727	2902.55	u*/ws	Fr	u*_sk/ws	0.00103455	0.607011	0.807389	0.0981576	1.24285	1.679		93	0.787583	2919.63	Cf	u*/ws	S	0.0307204	12.019	7.64935e-05	-1.30635	1.73997	0.810976
94	0.788727	2902.55	u*/ws	u*_sk/ws	Fr	0.00103455	0.607011	0.807389	0.0981576	1.679	1.24285		94	0.787583	2919.63	S	u*/ws	Cf	0.0307204	12.019	7.64935e-05	0.810976	1.73997	-1.30635
95	0.788727	2902.55	u*_sk/ws	Fr	u*/ws	0.00103455	0.607011	0.807389	1.679	1.24285	0.0981576		95	0.787583	2919.63	u*/ws	Cf	S	0.0307204	12.019	7.64935e-05	1.73997	-1.30635	0.810976
96	0.788727	2902.55	u*_sk/ws	u*/ws	Fr	0.00103455	0.607011	0.807389	1.679	0.0981576	1.24285		96	0.787583	2919.63	u*/ws	S	Cf	0.0307204	12.019	7.64935e-05	1.73997	0.810976	-1.30635
97	0.787844	2926.12	Rep	S	u*_sk/ws	0.432054	4.52994	0.0116112	-0.660925	0.528229	1.42446		97	0.787583	2919.63	h/Kc	S	u*/ws	0.151881	0.178378	0.262617	0.435442	0.81097	1.73997
98	0.787844	2926.12	S	Rep	u*_sk/ws	0.432054	4.52994	0.0116112	0.528229	-0.660925	1.42446		98	0.787583	2919.63	h/Kc	u*/ws	S	0.151881	0.178378	0.262617	0.435442	1.73997	0.81097
99	0.787844	2926.12	Rep	u*_sk/ws	S	0.432054	4.52994	0.0116112	-0.660925	1.42446	0.528229		99	0.787583	2919.63	u*/ws	S	h/Kc	0.151881	0.178378	0.262617	1.73997	0.81097	0.435442
100	0.787844	2926.12	u*_sk/ws	Rep	S	0.432054	4.52994	0.0116112	1.42446	-0.660925	0.528229		100	0.787583	2919.63	S	h/Kc	u*/ws	0.151881	0.178378	0.262617	0.81097	0.435442	1.73997
101	0.787844	2926.12	S	u*_sk/ws	Rep	0.432054	4.52994	0.0116112	0.528229	1.42446	-0.660925		101	0.787583	2919.63	u*/ws	h/Kc	S	0.151881	0.178378	0.262617	1.73997	0.435442	0.81097
102	0.787844	2926.12	u*_sk/ws	S	Rep	0.432054	4.52994	0.0116112	1.42446	0.528229	-0.660925		102	0.787583	2919.63	S	u*/ws	h/Kc	0.151881	0.178378	0.262617	0.81097	1.73997	0.435442
103	0.78769	2923.52	S	u*_sk/ws	u*/ws	0.0143747	2094.46	0.000102732	0.34476	3.44628	-1.67073		103	0.787657	2923.05	S	u*/ws	u*_sk/ws	0.56099	101.8	5.47077e-05	0.348556	-1.63598	3.41745
104	0.78769	2923.52	u*_sk/ws	S	u*/ws	0.0143747	2094.46	0.000102732	3.44628	0.34476	-1.67073		104	0.787657	2923.05	u*_sk/ws	u*/ws	S	0.56099	101.8	5.47077e-05	3.41745	-1.63598	0.348556
105	0.78769	2923.52	S	u*/ws	u*_sk/ws	0.0143747	2094.46	0.000102732	0.34476	-1.67073	3.44628		105	0.787657	2923.05	u*/ws	u*_sk/ws	S	0.56099	101.8	5.47077e-05	-1.63598	3.41745	0.348556
106	0.78769	2923.52	u*/ws	S	u*_sk/ws	0.0143747	2094.46	0.000102732	-1.67073	0.34476	3.44628		106	0.787657	2923.05	S	u*_sk/ws	u*/ws	0.56099	101.8	5.47077e-05	0.348556	3.41745	-1.63598
107	0.78769	2923.52	u*_sk/ws	u*/ws	S	0.0143747	2094.46	0.000102732	3.44628	-1.67073	0.34476		107	0.787657	2923.05	u*_sk/ws	S	u*/ws	0.56099	101.8	5.47077e-05	3.41745	0.348556	-1.63598
108	0.78769	2923.52	u*/ws	u*_sk/ws	S	0.0143747	2094.46	0.000102732	-1.67073	3.44628	0.34476		108	0.787657	2923.05	u*/ws	S	u*_sk/ws	0.56099	101.8	5.47077e-05	-1.63598	0.348556	3.41745
109	0.787606	2919.96	Cf	S	u*/ws	1.04594e+12	5.40848	5.00279e-18	-1.30848	0.810451	1.72833		109	0.787768	2925.01	Rep	u*_sk/ws	S	0.403692	2.99286	0.0183223	-0.640587	1.44194	0.529958
110	0.787606	2919.96	S	Cf	u*/ws	1.04594e+12	5.40848	5.00279e-18	0.810451	-1.30848	1.72833		110	0.787768	2925.01	Rep	S	u*_sk/ws	0.403692	2.99286	0.0183223	-0.640587	0.529958	1.44194
111	0.787606	2919.96	Cf	u*/ws	S	1.04594e+12	5.40848	5.00279e-18	-1.30848	1.72833	0.810451		111	0.787768	2925.01	S	Rep	u*_sk/ws	0.403692	2.99286	0.0183223	0.529958	-0.640587	1.44194
112	0.787606	2919.96	u*/ws	Cf	S	1.04594e+12	5.40848	5.00279e-18	1.72833	-1.30848	0.810451		112	0.787768	2925.01	S	u*_sk/ws	Rep	0.403692	2.99286	0.0183223	0.529958	1.44194	-0.640587
113	0.787606	2919.96	S	u*/ws	Cf	1.04594e+12	5.40848	5.00279e-18	0.810451	1.72833	-1.30848		113	0.787768	2925.01	u*_sk/ws	S	Rep	0.403692	2.99286	0.0183223	1.44194	0.529958	-0.640587
114	0.787606	2919.96	u*/ws	S	Cf	1.04594e+12	5.40848	5.00279e-18	1.72833	0.810451	-1.30848		114	0.787768	2925.01	u*_sk/ws	Rep	S	0.403692	2.99286	0.0183223	1.44194	-0.640587	0.529958
115	0.787606	2919.96	Fr	S	u*/ws	0.000996026	0.837278	0.0339367	2.61695	-0.498023	1.72834		115	0.78732	2925.19	Fr	S	u*_sk/ws	5.49129e-05	41.147	0.283304	1.28071	0.0114958	1.78214
116	0.787606	2919.96	S	Fr	u*/ws	0.000996026	0.837278	0.0339367	-0.498023	2.61695	1.72834		116	0.78732	2925.19	S	Fr	u*_sk/ws	5.49129e-05	41.147	0.283304	0.0114958	1.28071	1.78214
117	0.787606	2919.96	Fr	u*/ws	S	0.000996026	0.837278	0.0339367	2.61695	1.72834	-0.498023		117	0.78732	2925.19	Fr	u*_sk/ws	S	5.49129e-05	41.147	0.283304	1.28071	1.78214	0.0114958
118	0.787606	2919.96	u*/ws	Fr	S	0.000996026	0.837278	0.0339367	1.72834	2.61695	-0.498023		118	0.78732	2925.19	u*_sk/ws	Fr	S	5.49129e-05	41.147	0.283304	1.78214	1.28071	0.0114958
119	0.787606	2919.96	S	u*/ws	Fr	0.000996026	0.837278	0.0339367	-0.498023	1.72834	2.61695		119	0.78732	2925.19	S	u*_sk/ws	Fr	5.49129e-05	41.147	0.283304	0.0114958	1.78214	1.28071
120	0.787606	2919.96	u*/ws	S	Fr	0.000996026	0.837278	0.0339367	1.72834	-0.498023	2.61695		120	0.78732	2925.19	u*_sk/ws	S	Fr	5.49129e-05	41.147	0.283304	1.78214	0.0114958	1.28071
121	0.787606	2919.96	Fr	Cf	u*/ws	0.000773441	2.56623	0.0142579	1.62089	-0.498038	1.72832		121	0.787121	2927.67	Fr	Cf	u*/ws	0.00172592	1.30008	0.016414	1.68146	-0.475298	1.71775
122	0.787606	2919.96	Cf	Fr	u*/ws	0.000773441	2.56623	0.0142579	-0.498038	1.62089	1.72832		122	0.787121	2927.67	Cf	Fr	u*/ws	0.00172592	1.30008	0.016414	-0.475298	1.68146	1.71775
123	0.787606	2919.96	Fr	u*/ws	Cf	0.000773441	2.56623	0.0142579	1.62089	1.72832	-0.498038		123	0.787121	2927.67	Fr	u*/ws	Cf	0.00172592	1.30008	0.016414	1.68146	1.71775	-0.475298
124	0.787606	2919.96	u*/ws	Fr	Cf	0.000773441	2.56623	0.0142579	1.72832	1.62089	-0.498038		124	0.787121	2927.67	u*/ws	Fr	Cf	0.00172592	1.30008	0.016414	1.71775	1.68146	-0.475298
125	0.787606	2919.96	Cf	u*/ws	Fr	0.000773441	2.56623	0.0142579	-0.498038	1.72832	1.62089		125	0.787121	2927.67	Cf	u*/ws	Fr	0.00172592	1.30008	0.016414	-0.475298	1.71775	1.68146
126	0.787606	2919.96	u*/ws	Cf	Fr	0.000773441	2.56623	0.0142579	1.72832	-0.498038	1.62089		126	0.787121	2927.67	u*/ws	Cf	Fr	0.00172592	1.30008	0.016414	1.71775	-0.475298	1.68146
127	0.787606	2919.96	Fr	h/Kc	u*/ws	0.390907	0.00347943	0.171256	1.62089	0.166017	1.72833		127	0.786391	2940.53	Rep (u*D)	u*_sk/ws	Fr	0.000668027	0.415243	2.38039	-0.00415617	1.76984	1.34085
128	0.787606	2919.96	h/Kc	Fr	u*/ws	0.390907	0.00347943	0.171256	0.166017	1.62089	1.72833		128	0.786391	2940.53	Rep (u*D)	Fr	u*_sk/ws	0.000668027	0.415243	2.38039	-0.00415617	1.34085	1.76984
129	0.787606	2919.96	Fr	u*/ws	h/Kc	0.390907	0.00347943	0.171256	1.62089	1.72833	0.166017		129	0.786391	2940.53	u*_sk/ws	Fr	Rep (u*D)	0.000668027	0.415243	2.38039	1.76984	1.34085	-0.00415617
130	0.787606	2919.96	u*/ws	Fr	h/Kc	0.390907	0.00347943	0.171256	1.72833	1.62089	0.166017		130	0.786391	2940.53	Fr	Rep (u*D)	u*_sk/ws	0.000668027	0.415243	2.38039	1.34085	-0.00415617	1.76984
131	0.787606	2919.96	h/Kc	u*/ws	Fr	0.390907	0.00347943	0.171256	0.166017	1.72833	1.62089		131	0.786391	2940.53	Fr	u*_sk/ws	Rep (u*D)	0.000668027	0.415243	2.38039	1.34085	1.76984	-0.00415617
132	0.787606	2919.96	u*/ws	h/Kc	Fr	0.390907	0.00347943	0.171256	1.72833	0.166017	1.62089		132	0.786391	2940.53	u*_sk/ws	Rep (u*D)	Fr	0.000668027	0.415243	2.38039	1.76984	-0.00415617	1.34085
133	0.787606	2919.96	h/Kc	S	u*/ws	0.110396	0.202611	0.321629	0.436159	0.810452	1.72836		133	0.786757	2945.32	h/D50	Cf	u*/ws	99223.2	1.14391e-05	4.30648e-05	-0.754339	-1.17405	1.8577
134	0.787606	2919.96	S	h/Kc	u*/ws	0.110396	0.202611	0.321629	0.810452	0.436159	1.72836		134	0.786757	2945.32	Cf	h/D50	u*/ws	99223.2	1.14391e-05	4.30648e-05	-1.17405	-0.754339	1.8577
135	0.787606	2919.96	h/Kc	u*/ws	S	0.110396	0.202611	0.321629	0.436159	1.72836	0.810452		135	0.786757	2945.32	h/D50	u*/ws	Cf	99223.2	1.14391e-05	4.30648e-05	-0.754339	1.8577	-1.17405
136	0.787606	2919.96	u*/ws	h/Kc	S	0.110396	0.202611	0.321629	1.72836	0.436159	0.810452		136	0.786757	2945.32	u*/ws	h/D50	Cf	99223.2	1.14391e-05	4.30648e-05	1.8577	-0.754339	-1.17405
137	0.787606	2919.96	S	u*/ws	h/Kc	0.110396	0.202611	0.321629	0.810452	1.72836	0.436159		137	0.786757	2945.32	Cf	u*/ws	h/D50	99223.2	1.14391e-05	4.30648e-05	-1.17405	1.8577	-0.754339
138	0.787606	2919.96	u*/ws	S	h/Kc	0.110396	0.202611	0.321629	1.72836	0.810452	0.436159		138	0.786757	2945.32	u*/ws	Cf	h/D50	99223.2	1.14391e-05	4.30648e-05	1.8577	-1.17405	-0.754339
139	0.786823	2946.28	h/D50	Cf	u*/ws	3018.72	4.37941e-05	0.000355564	-0.755443	-1.18695	1.84869		139	0.786756	2945.32	u*/ws	h/Kc	h/D50	0.2558	0.0351693	0.781947	1.85768	0.391334	-0.754331
140	0.786823	2946.28	u*/ws	h/D50	Cf	3018.72	4.37941e-05	0.000355564	1.84869	-0.755443	-1.18695		140	0.786756	2945.32	h/D50	u*/ws	h/Kc	0.2558	0.0351693	0.781947	-0.754331	1.85768	0.391334
141	0.786823	2946.28	u*/ws	Cf	h/D50	3018.72	4.37941e-05	0.000355564	1.84869	-1.18695	-0.755443		141	0.786756	2945.32	h/D50	h/Kc	u*/ws	0.2558	0.0351693	0.781947	-0.754331	0.391334	1.85768
142	0.786823	2946.28	Cf	h/D50	u*/ws	3018.72	4.37941e-05	0.000355564	-1.18695	-0.755443	1.84869		142	0.786756	2945.32	h/Kc	u*/ws	h/D50	0.2558	0.0351693	0.781947	0.391334	1.85768	-0.754331
143	0.786823	2946.28	h/D50	u*/ws	Cf	3018.72	4.37941e-05	0.000355564	-0.755443	1.84869	-1.18695		143	0.786756	2945.32	u*/ws	h/D50	h/Kc	0.2558	0.0351693	0.781947	1.85768	-0.754331	0.391334
144	0.786823	2946.28	Cf	u*/ws	h/D50	3018.72	4.37941e-05	0.000355564	-1.18695	1.84869	-0.755443		144	0.786756	2945.32	h/Kc	h/D50	u*/ws	0.2558	0.0351693	0.781947	0.391334	-0.754331	1.85768
145	0.786823	2946.27	h/Kc	u*/ws	h/D50	0.0245978	2.47681	0.117266	0.395638	1.84868	-0.755437		145	0.785368	2949.26	Fr	u*_sk/ws	did50	2.24534	0.00153813	0.10306	1.02736	1.75129	-0.0279862
146	0.786823	2946.27	h/Kc	h/D50	u*/ws	0.0245978	2.47681	0.117266	0.395638	-0.755437	1.84868		146	0.785368	2949.26	did50	Fr	u*_sk/ws	2.24534	0.00153813	0.10306	-0.0279862	1.02736	1.75129
147	0.786823	2946.27	h/D50	h/Kc	u*/ws	0.0245978	2.47681	0.117266	-0.755437	0.395638	1.84868		147	0.785368	2949.26	Fr	did50	u*_sk/ws	2.24534	0.00153813	0.10306	1.02736	-0.0279862	1.75129
148	0.786823	2946.27	u*/ws	h/Kc	h/D50	0.0245978	2.47681	0.117266	1.84868	0.395638	-0.755437		148	0.785368	2949.26	did50	u*_sk/ws	Fr	2.24534	0.00153813	0.10306	-0.0279862	1.75129	1.02736
149	0.786823	2946.27	h/D50	u*/ws	h/Kc	0.0245978	2.47681	0.117266	-0.755437	1.84868	0.395638		149	0.785368	2949.26	u*_sk/ws	did50	Fr	2.24534	0.00153813	0.10306	1.75129	-0.0279862	1.02736
150	0.786823	2946.27	u*/ws	h/D50	h/Kc	0.0245978	2.47681	0.117266	1.84868	-0.755437	0.395638		150	0.785368	2949.26	u*_sk/ws	Fr	did50	2.24534	0.00153813	0.10306	1.75129	1.02736	-0.0279862
151	0.785484	2964.1	h/D50	h/Kc	u*_sk/ws	0.712638	0.0331415	0.180373	-0.5181	0.179282	1.83063		151	0.784628	2961.79	S	did50	u*_sk/ws	2.22153	24.4857	4.63699e-05	0.448205	1.06979	2.42166
152	0.785484	2964.1	h/Kc	u*_sk/ws	h/D50	0.712638	0.0331415	0.180373	0.179282	1.83063	-0.5181		152	0.784628	2961.79	did50	u*_sk/ws	S	2.22153	24.4857	4.63699e-05	1.06979	2.42166	0.448205
153	0.785484	2964.1	u*_sk/ws	h/Kc	h/D50	0.712638	0.0331415	0.180373	1.83063	0.179282	-0.5181		153	0.784628	2961.79	S	u*_sk/ws	did50	2.22153	24.4857	4.63699e-05	0.448205	2.42166	1.06979
154	0.785484	2964.1	h/D50	u*_sk/ws	h/Kc	0.712638	0.0331415	0.180373	-0.5181	1.83063	0.179282		154	0.784628	2961.79	did50	S	u*_sk/ws	2.22153	24.4857	4.63699e-05	1.06979	0.448205	2.42166
155	0.785484	2964.1	u*_sk/ws	h/D50	h/Kc	0.712638	0.0331415	0.180373	1.83063	-0.5181	0.179282		155	0.784628	2961.79	u*_sk/ws	did50	S	2.22153	24.4857	4.63699e-05	2.42166	1.06979	0.448205
156	0.785484	2964.1	h/Kc	h/D50	u*_sk/ws	0.712638	0.0331415	0.180373	0.179282	-0.5181	1.83063		156	0.784628	2961.79	u*_sk/ws	S	did50	2.22153	24.4857	4.63699e-05	2.42166	0.448205	1.06979
157	0.785461	2963.56	h/D50	Cf	u*_sk/ws	134.239	0.000983015	0.0034852	-0.518258	-0.527731	1.83836		157	0.785425	2963.25	u*_sk/ws	Cf	h/D50	195.87	0.000307752	0.00768688	1.83727	-0.521619	-0.516116
158	0.785461	2963.56	Cf	h/D50	u*_sk/ws	134.239	0.000983015	0.0034852	-0.527731	-0.518258	1.83836		158	0.785425	2963.25	h/D50	Cf	u*_sk/ws	195.87	0.000307752	0.00768688	-0.516116	-0.521619	1.83727
159	0.785461	2963.56	h/D50	u*_sk/ws	Cf	134.239	0.000983015	0.0034852	-0.518258	1.83836	-0.527731		159	0.785425	2963.25	Cf	h/D50	u*_sk/ws	195.87	0.000307752	0.00768688	-0.521619	-0.516116	1.83727
160	0.785461	2963.56	u*_sk/ws	h/D50	Cf	134.239	0.000983015	0.0034852	1.83836	-0.518258	-0.527731		160	0.785425	2963.25	h/D50	u*_sk/ws	Cf	195.87	0.000307752	0.00768688	-0.516116	1.83727	-0.521619
161	0.785461	2963.56	Cf	u*_sk/ws	h/D50	134.239	0.000983015	0.0034852	-0.527731	1.83836	-0.518258		161	0.785425	2963.25	u*_sk/ws	h/D50	Cf	195.87	0.000307752	0.00768688	1.83727	-0.516116	-0.521619
162	0.785461	2963.56	u*_sk/ws	Cf	h/D50	134.239	0.000983015	0.0034852	1.83836	-0.527731	-0.518258		162	0.785425	2963.25	Cf	u*_sk/ws	h/D50	195.87	0.000307752	0.00768688	-0.521619	1.83727	-0.516116
163	0.785325	2958.05	Fr	Rep (u*_sk D)	u*_sk/ws	0.00137189	0.0280679	19.7564	1.38676	-0.0223349	1.74994		163	0.784636	2967.28	Fr	Rep	u*_sk/ws	0.0012396	0.0366672	15.8399	1.38197	-0.00495951	1.76244
164	0.785325	2958.05	Rep (u*_sk D)	Fr	u*_sk/ws	0.00137189	0.0280679	19.7564	-0.0223349	1.38676	1.74994		164	0.784636	2967.28	u*_sk/ws	Rep	Fr	0.0012396	0.0366672	15.8399	1.76244	-0.00495951	1.38197
165	0.785325	2958.05	Fr	u*_sk/ws	Rep (u*_sk D)	0.00137189	0.0280679	19.7564	1.38676	1.74994	-0.0223349		165	0.784636	2967.28	Rep	Fr	u*_sk/ws	0.0012396	0.0366672	15.8399	-0.00495951	1.38197	1.76244
166	0.785325	2958.05	u*_sk/ws	Fr	Rep (u*_sk D)	0.00137189	0.0280679	19.7564	1.74994	1.38676	-0.0223349		166	0.784636	2967.28	Fr	u*_sk/ws	Rep	0.0012396	0.0366672	15.8399	1.38197	1.76244	-0.00495951
167	0.785325	2958.05	Rep (u*_sk D)	u*_sk/ws	Fr	0.00137189	0.0280679	19.7564	-0.0223349	1.74994	1.38676		167	0.784636	2967.28	u*_sk/ws	Fr	Rep	0.0012396	0.0366672	15.8399	1.76244	1.38197	-0.00495951
168	0.785325	2958.05	u*_sk/ws	Rep (u*_sk D)	Fr	0.00137189	0.0280679	19.7564	1.74994	-0.0223349	1.38676		168	0.784636	2967.28	Rep	u*_sk/ws	Fr	0.0012396	0.0366672	15.8399	-0.00495951	1.76244	1.38197
169	0.78467	2962.38	did50	S	u*_sk/ws	1.51913	1.51359	0.00106421	1.09445	0.445392	2.43032		169	0.784426	2969.52	Fr	Rep (u*_sk D)	u*_sk/ws	0.00109348	0.0443538	14.4356	1.37614	0.00280082	1.76814
170	0.78467	2962.38	S	did50	u*_sk/ws	1.51913	1.51359	0.00106421	0.445392	1.09445	2.43032		170	0.784426	2969.52	Rep (u*_sk D)	Fr	u*_sk/ws	0.00109348	0.0443538	14.4356	0.00280082	1.37614	1.76814
171	0.78467	2962.38	did50	u*_sk/ws	S	1.51913	1.51359	0.00106421	1.09445	2.43032	0.445392		171	0.784426	2969.52	Fr	u*_sk/ws	Rep (u*_sk D)	0.00109348	0.0443538	14.4356	1.37614	1.76814	0.00280082
172	0.78467	2962.38	u*_sk/ws	did50	S	1.51913	1.51359	0.00106421	2.43032	1.09445	0.445392		172	0.784426	2969.52	u*_sk/ws	Fr	Rep (u*_sk D)	0.00109348	0.0443538	14.4356	1.76814	1.37614	0.00280082
173	0.78467	2962.38	S	u*_sk/ws	did50	1.51913	1.51359	0.00106421	0.445392	2.43032	1.09445		173	0.784426	2969.52	Rep (u*_sk D)	u*_sk/ws	Fr	0.00109348	0.0443538	14.4356	0.00280082	1.76814	1.37614
174	0.78467	2962.38	u*_sk/ws	S	did50	1.51913	1.51359	0.00106421	2.43032	0.445392	1.09445		174	0.784426	2969.52	u*_sk/ws	Rep (u*_sk D)	Fr	0.00109348	0.0443538	14.4356	1.76814	0.00280082	1.37614
175	0.784479	2970.84	Fr	Rep	u*_sk/ws	0.00145015	0.0217345	23.971	1.39448	-0.0122188	1.7498		175	0.784037	2974.62	Fr	Rep (u*_sk D)	u*/ws	0.000929063	29.7416	0.320623	1.90452	-0.976357	1.24765
176	0.784479	2970.84	Rep	Fr	u*_sk/ws	0.00145015	0.0217345	23.971	-0.0122188	1.39448	1.7498		176	0.784037	2974.62	Rep (u*_sk D)	Fr	u*/ws	0.000929063	29.7416	0.320623	-0.976357	1.90452	1.24765
177	0.784479	2970.84	Rep	u*_sk/ws	Fr	0.00145015	0.0217345	23.971	-0.0122188	1.7498	1.39448		177	0.784037	2974.62	Fr	u*/ws	Rep (u*_sk D)	0.000929063	29.7416	0.320623	1.90452	1.24765	-0.976357
178	0.784479	2970.84	u*_sk/ws	Rep	Fr	0.00145015	0.0217345	23.971	1.7498	-0.0122188	1.39448		178	0.784037	2974.62	u*/ws	Fr	Rep (u*_sk D)	0.000929063	29.7416	0.320623	1.24765	1.90452	-0.976357
179	0.784479	2970.84	Fr	u*_sk/ws	Rep	0.00145015	0.0217345	23.971	1.39448	1.7498	-0.0122188		179	0.784037	2974.62	Rep (u*_sk D)	u*/ws	Fr	0.000929063	29.7416	0.320623	-0.976357	1.24765	1.90452
180	0.784479	2970.84	u*_sk/ws	Fr	Rep	0.00145015	0.0217345	23.971	1.7498	1.39448	-0.0122188		180	0.784037	2974.62	u*/ws	Rep (u*_sk D)	Fr	0.000929063	29.7416	0.320623	1.24765	-0.976357	1.90452
181	0.782452	3004.95	h/D50	u*/ws	u*_sk/ws	8.75076	2.20796e-08	14548.9	-0.326267	-1.47453	3.29646		181	0.773891	3126.24	u*_sk/ws	Cf	u*/ws	0.149358	8.20166	0.0292991	5.5869	0.821072	-3.7913
182	0.782452	3004.95	u*/ws	h/D50	u*_sk/ws	8.75076	2.20796e-08	14548.9	-1.47453	-0.326267	3.29646		182	0.773891	3126.24	u*_sk/ws	u*/ws	Cf	0.149358	8.20166	0.0292991	5.5869	-3.7913	0.821072
183	0.782452	3004.95	u*/ws	u*_sk/ws	h/D50	8.75076	2.20796e-08	14548.9	-1.47453	3.29646	-0.326267		183	0.773891	3126.24	Cf	u*_sk/ws	u*/ws	0.149358	8.20166	0.0292991	0.821072	5.5869	-3.7913
184	0.782452	3004.95	h/D50	u*_sk/ws	u*/ws	8.75076	2.20796e-08	14548.9	-0.326267	3.29646	-1.47453		184	0.773891	3126.24	Cf	u*/ws	u*_sk/ws	0.149358	8.20166	0.0292991	0.821072	-3.7913	5.5869
185	0.782452	3004.95	u*_sk/ws	h/D50	u*/ws	8.75076	2.20796e-08	14548.9	3.29646	-0.326267	-1.47453		185	0.773891	3126.24	u*/ws	Cf	u*_sk/ws	0.149358	8.20166	0.0292991	-3.7913	0.821072	5.5869
186	0.782452	3004.95	u*_sk/ws	u*/ws	h/D50	8.75076	2.20796e-08	14548.9	3.29646	-1.47453	-0.326267		186	0.773891	3126.24	u*/ws	u*_sk/ws	Cf	0.149358	8.20166	0.0292991	-3.7913	5.5869	0.821072
187	0.781596	3003.23	Fr	Rep (u*_sk D)	u*/ws	0.00156438	14.3313	0.231484	1.79481	-0.845024	1.31256		187	0.773891	3126.24	h/Kc	u*_sk/ws	u*/ws	2.20968e-05	8.34603	6.0245	-0.27369	5.58691	-3.7913
188	0.781596	3003.23	Rep (u*_sk D)	Fr	u*/ws	0.00156438	14.3313	0.231484	-0.845024	1.79481	1.31256		188	0.773891	3126.24	u*_sk/ws	h/Kc	u*/ws	2.20968e-05	8.34603	6.0245	5.58691	-0.27369	-3.7913
189	0.781596	3003.23	Fr	u*/ws	Rep (u*_sk D)	0.00156438	14.3313	0.231484	1.79481	1.31256	-0.845024		189	0.773891	3126.24	h/Kc	u*/ws	u*_sk/ws	2.20968e-05	8.34603	6.0245	-0.27369	-3.7913	5.58691
190	0.781596	3003.23	u*/ws	Fr	Rep (u*_sk D)	0.00156438	14.3313	0.231484	1.31256	1.79481	-0.845024		190	0.773891	3126.24	u*_sk/ws	u*/ws	h/Kc	2.20968e-05	8.34603	6.0245	5.58691	-3.7913	-0.27369
191	0.781596	3003.23	Rep (u*_sk D)	u*/ws	Fr	0.00156438	14.3313	0.231484	-0.845024	1.31256	1.79481		191	0.773891	3126.24	u*/ws	h/Kc	u*_sk/ws	2.20968e-05	8.34603	6.0245	-3.7913	-0.27369	5.58691
192	0.781596	3003.23	u*/ws	Rep (u*_sk D)	Fr	0.00156438	14.3313	0.231484	1.31256	-0.845024	1.79481		192	0.773891	3126.24	u*/ws	u*_sk/ws	h/Kc	2.20968e-05	8.34603	6.0245	-3.7913	5.58691	-0.27369
193	0.774275	3117.15	Fr	Rep (u*D)	u*_sk/ws	0.000469356	0.0724255	23.8134	1.49627	0.0526845	1.75479		193	0.767821	3188.59	Rep (u*D)	S	u*_sk/ws	8.89867	0.0692501	0.137511	-0.94401	0.524352	1.38535
194	0.774275	3117.15	Rep (u*D)	Fr	u*_sk/ws	0.000469356	0.0724255	23.8134	0.0526845	1.49627	1.75479		194	0.767821	3188.59	S	Rep (u*D)	u*_sk/ws	8.89867	0.0692501	0.137511	0.524352	-0.94401	1.38535
195	0.774275	3117.15	Fr	u*_sk/ws	Rep (u*D)	0.000469356	0.0724255	23.8134	1.49627	1.75479	0.0526845		195	0.767821	3188.59	u*_sk/ws	Rep (u*D)	S	8.89867	0.0692501	0.137511	1.38535	-0.94401	0.524352
196	0.774275	3117.15	u*_sk/ws	Fr	Rep (u*D)	0.000469356	0.0724255	23.8134	1.75479	1.49627	0.0526845		196	0.767821	3188.59	Rep (u*D)	u*_sk/ws	S	8.89867	0.0692501	0.137511	-0.94401	1.38535	0.524352
197	0.774275	3117.15	Rep (u*D)	u*_sk/ws	Fr	0.000469356	0.0724255	23.8134	0.0526845	1.75479	1.49627		197	0.767821	3188.59	S	u*_sk/ws	Rep (u*D)	8.89867	0.0692501	0.137511	0.524352	1.38535	-0.94401
198	0.774275	3117.15	u*_sk/ws	Rep (u*D)	Fr	0.000469356	0.0724255	23.8134	1.75479	0.0526845	1.49627		198	0.767821	3188.59	u*_sk/ws	S	Rep (u*D)	8.89867	0.0692501	0.137511	1.38535	0.524352	-0.94401
199	0.773942	3126.98	h/Kc	u*_sk/ws	u*/ws	8.06142e-08	0.768202	17703	-0.268988	5.59087	-3.79674		199	0.762187	3278.02	Fr	u*/ws	h/D50	18.2199	5.64681e-05	0.0741398	2.37053	1.6808	0.328421
200	0.773942	3126.98	u*_sk/ws	h/Kc	u*/ws	8.06142e-08	0.768202	17703	5.59087	-0.268988	-3.79674		200	0.762187	3278.02	Fr	h/D50	u*/ws	18.2199	5.64681e-05	0.0741398	2.37053	0.328421	1.6808
201	0.773942	3126.98	h/Kc	u*/ws	u*_sk/ws	8.06142e-08	0.768202	17703	-0.268988	-3.79674	5.59087		201	0.762187	3278.02	h/D50	Fr	u*/ws	18.2199	5.64681e-05	0.0741398	0.328421	2.37053	1.6808
202	0.773942	3126.98	u*/ws	h/Kc	u*_sk/ws	8.06142e-08	0.768202	17703	-3.79674	-0.268988	5.59087		202	0.762187	3278.02	u*/ws	Fr	h/D50	18.2199	5.64681e-05	0.0741398	1.6808	2.37053	0.328421
203	0.773942	3126.98	u*_sk/ws	u*/ws	h/Kc	8.06142e-08	0.768202	17703	5.59087	-3.79674	-0.268988		203	0.762187	3278.02	h/D50	u*/ws	Fr	18.2199	5.64681e-05	0.0741398	0.328421	1.6808	2.37053
204	0.773942	3126.98	u*/ws	u*_sk/ws	h/Kc	8.06142e-08	0.768202	17703	-3.79674	5.59087	-0.268988		204	0.762187	3278.02	u*/ws	h/D50	Fr	18.2199	5.64681e-05	0.0741398	1.6808	0.328421	2.37053
205	0.773942	3126.98	Cf	u*_sk/ws	u*/ws	77.3492	0.0569839	0.00756968	0.806968	5.59088	-3.79676		205	0.761758	3295.04	Fr	u*/ws	tau	0.00349486	0.803451	0.262985	1.88606	1.93599	-0.356302
206	0.773942	3126.98	u*_sk/ws	Cf	u*/ws	77.3492	0.0569839	0.00756968	5.59088	0.806968	-3.79676		206	0.761758	3295.04	u*/ws	Fr	tau	0.00349486	0.803451	0.262985	1.93599	1.88606	-0.356302
207	0.773942	3126.98	Cf	u*/ws	u*_sk/ws	77.3492	0.0569839	0.00756968	0.806968	-3.79676	5.59088		207	0.761758	3295.04	Fr	tau	u*/ws	0.00349486	0.803451	0.262985	1.88606	-0.356302	1.93599
208	0.773942	3126.98	u*/ws	Cf	u*_sk/ws	77.3492	0.0569839	0.00756968	-3.79676	0.806968	5.59088		208	0.761758	3295.04	u*/ws	tau	Fr	0.00349486	0.803451	0.262985	1.93599	-0.356302	1.88606
209	0.773942	3126.98	u*_sk/ws	u*/ws	Cf	77.3492	0.0569839	0.00756968	5.59088	-3.79676	0.806968		209	0.761758	3295.04	tau	u*/ws	Fr	0.00349486	0.803451	0.262985	-0.356302	1.93599	1.88606
210	0.773942	3126.98	u*/ws	u*_sk/ws	Cf	77.3492	0.0569839	0.00756968	-3.79676	5.59088	0.806968		210	0.761758	3295.04	tau	Fr	u*/ws	0.00349486	0.803451	0.262985	-0.356302	1.88606	1.93599
211	0.767872	3189.33	Rep (u*D)	S	u*_sk/ws	1.44553	0.301473	0.204373	-0.967969	0.521477	1.367		211	0.75185	3413.63	h/D50	u*_sk/ws	Rep (u*D)	8.02991e-05	0.0851315	2759.4	-0.453081	1.65593	-0.551449
212	0.767872	3189.33	S	Rep (u*D)	u*_sk/ws	1.44553	0.301473	0.204373	0.521477	-0.967969	1.367		212	0.75185	3413.63	u*_sk/ws	h/D50	Rep (u*D)	8.02991e-05	0.0851315	2759.4	1.65593	-0.453081	-0.551449
213	0.767872	3189.33	Rep (u*D)	u*_sk/ws	S	1.44553	0.301473	0.204373	-0.967969	1.367	0.521477		213	0.75185	3413.63	h/D50	Rep (u*D)	u*_sk/ws	8.02991e-05	0.0851315	2759.4	-0.453081	-0.551449	1.65593
214	0.767872	3189.33	u*_sk/ws	Rep (u*D)	S	1.44553	0.301473	0.204373	1.367	-0.967969	0.521477		214	0.75185	3413.63	Rep (u*D)	h/D50	u*_sk/ws	8.02991e-05	0.0851315	2759.4	-0.551449	-0.453081	1.65593
215	0.767872	3189.33	S	u*_sk/ws	Rep (u*D)	1.44553	0.301473	0.204373	0.521477	1.367	-0.967969		215	0.75185	3413.63	Rep (u*D)	u*_sk/ws	h/D50	8.02991e-05	0.0851315	2759.4	-0.551449	1.65593	-0.453081
216	0.767872	3189.33	u*_sk/ws	S	Rep (u*D)	1.44553	0.301473	0.204373	1.367	0.521477	-0.967969		216	0.75185	3413.63	u*_sk/ws	Rep (u*D)	h/D50	8.02991e-05	0.0851315	2759.4	1.65593	-0.551449	-0.453081
217	0.764747	3244.78	did50	Fr	u*/ws	4.79577e-09	1.32394e+11	5.40888e-07	0.878283	1.69528	2.21423		217	0.752936	3414.64	u*_sk/ws	tau	u*/ws	17.6712	0.0020797	0.00482597	4.03545	0.414452	-2.51389
218	0.764747	3244.78	Fr	did50	u*/ws	4.79577e-09	1.32394e+11	5.40888e-07	1.69528	0.878283	2.21423		218	0.752936	3414.64	tau	u*_sk/ws	u*/ws	17.6712	0.0020797	0.00482597	0.414452	4.03545	-2.51389
219	0.764747	3244.78	did50	u*/ws	Fr	4.79577e-09	1.32394e+11	5.40888e-07	0.878283	2.21423	1.69528		219	0.752936	3414.64	u*/ws	tau	u*_sk/ws	17.6712	0.0020797	0.00482597	-2.51389	0.414452	4.03545
220	0.764747	3244.78	u*/ws	did50	Fr	4.79577e-09	1.32394e+11	5.40888e-07	2.21423	0.878283	1.69528		220	0.752936	3414.64	tau	u*/ws	u*_sk/ws	17.6712	0.0020797	0.00482597	0.414452	-2.51389	4.03545
221	0.764747	3244.78	Fr	u*/ws	did50	4.79577e-09	1.32394e+11	5.40888e-07	1.69528	2.21423	0.878283		221	0.752936	3414.64	u*_sk/ws	u*/ws	tau	17.6712	0.0020797	0.00482597	4.03545	-2.51389	0.414452
222	0.764747	3244.78	u*/ws	Fr	did50	4.79577e-09	1.32394e+11	5.40888e-07	2.21423	1.69528	0.878283		222	0.752936	3414.64	u*/ws	u*_sk/ws	tau	17.6712	0.0020797	0.00482597	-2.51389	4.03545	0.414452
223	0.762247	3278.9	h/D50	Fr	u*/ws	24.6923	0.000623256	0.00513234	0.325847	2.36498	1.66468		223	0.745041	3526.57	S	u*_sk/ws	tau	0.557097	0.0547487	0.28768	0.552518	2.11587	-0.410492
224	0.762247	3278.9	Fr	u*/ws	h/D50	24.6923	0.000623256	0.00513234	2.36498	1.66468	0.325847		224	0.745041	3526.57	u*_sk/ws	S	tau	0.557097	0.0547487	0.28768	2.11587	0.552518	-0.410492
225	0.762247	3278.9	u*/ws	Fr	h/D50	24.6923	0.000623256	0.00513234	1.66468	2.36498	0.325847		225	0.745041	3526.57	S	tau	u*_sk/ws	0.557097	0.0547487	0.28768	0.552518	-0.410492	2.11587
226	0.762247	3278.9	h/D50	u*/ws	Fr	24.6923	0.000623256	0.00513234	0.325847	1.66468	2.36498		226	0.745041	3526.57	tau	S	u*_sk/ws	0.557097	0.0547487	0.28768	-0.410492	0.552518	2.11587
227	0.762247	3278.9	u*/ws	h/D50	Fr	24.6923	0.000623256	0.00513234	1.66468	0.325847	2.36498		227	0.745041	3526.57	tau	u*_sk/ws	S	0.557097	0.0547487	0.28768	-0.410492	2.11587	0.552518
228	0.762247	3278.9	Fr	h/D50	u*/ws	24.6923	0.000623256	0.00513234	2.36498	0.325847	1.66468		228	0.745041	3526.57	u*_sk/ws	tau	S	0.557097	0.0547487	0.28768	2.11587	-0.410492	0.552518
229	0.761816	3295.86	tau	Fr	u*/ws	0.00953703	0.463755	0.169192	-0.371108	1.88817	1.9341		229	0.744392	3533.26	did50	Rep	S	0.0679318	0.0241585	286.706	-1.39745	-1.49553	0.63757
230	0.761816	3295.86	tau	u*/ws	Fr	0.00953703	0.463755	0.169192	-0.371108	1.9341	1.88817		230	0.744392	3533.26	did50	S	Rep	0.0679318	0.0241585	286.706	-1.39745	0.63757	-1.49553
231	0.761816	3295.86	Fr	u*/ws	tau	0.00953703	0.463755	0.169192	1.88817	1.9341	-0.371108		231	0.744392	3533.26	S	did50	Rep	0.0679318	0.0241585	286.706	0.63757	-1.39745	-1.49553
232	0.761816	3295.86	u*/ws	Fr	tau	0.00953703	0.463755	0.169192	1.9341	1.88817	-0.371108		232	0.744392	3533.26	Rep	S	did50	0.0679318	0.0241585	286.706	-1.49553	0.63757	-1.39745
233	0.761816	3295.86	Fr	tau	u*/ws	0.00953703	0.463755	0.169192	1.88817	-0.371108	1.9341		233	0.744392	3533.26	S	Rep	did50	0.0679318	0.0241585	286.706	0.63757	-1.49553	-1.39745
234	0.761816	3295.86	u*/ws	tau	Fr	0.00953703	0.463755	0.169192	1.9341	-0.371108	1.88817		234	0.744392	3533.26	Rep	did50	S	0.0679318	0.0241585	286.706	-1.49553	-1.39745	0.63757
235	0.752981	3415.29	u*_sk/ws	u*/ws	tau	0.129929	109.615	1.26936e-05	4.04463	-2.52395	0.401933		235	0.743218	3544.67	Rep	u*/ws	h/D50	0.436882	20.3725	0.00740559	-0.987203	1.1626	-0.591081
236	0.752981	3415.29	u*/ws	u*_sk/ws	tau	0.129929	109.615	1.26936e-05	-2.52395	4.04463	0.401933		236	0.743218	3544.67	h/D50	Rep	u*/ws	0.436882	20.3725	0.00740559	-0.591081	-0.987203	1.1626
237	0.752981	3415.29	u*_sk/ws	tau	u*/ws	0.129929	109.615	1.26936e-05	4.04463	0.401933	-2.52395		237	0.743218	3544.67	Rep	h/D50	u*/ws	0.436882	20.3725	0.00740559	-0.987203	-0.591081	1.1626
238	0.752981	3415.29	tau	u*_sk/ws	u*/ws	0.129929	109.615	1.26936e-05	0.401933	4.04463	-2.52395		238	0.743218	3544.67	h/D50	u*/ws	Rep	0.436882	20.3725	0.00740559	-0.591081	1.1626	-0.987203
239	0.752981	3415.29	u*/ws	tau	u*_sk/ws	0.129929	109.615	1.26936e-05	-2.52395	0.401933	4.04463		239	0.743218	3544.67	u*/ws	h/D50	Rep	0.436882	20.3725	0.00740559	1.1626	-0.591081	-0.987203
240	0.752981	3415.29	tau	u*/ws	u*_sk/ws	0.129929	109.615	1.26936e-05	0.401933	-2.52395	4.04463		240	0.743218	3544.67	u*/ws	Rep	h/D50	0.436882	20.3725	0.00740559	1.1626	-0.987203	-0.591081
241	0.751912	3414.53	h/D50	Rep (u*D)	u*_sk/ws	897.571	3.23542e-05	0.683184	-0.449359	-0.579012	1.63537		241	0.742236	3562.88	Fr	u*/ws	tau_sk	0.0009541	0.0254713	28.1992	1.88661	1.79784	-0.105856
242	0.751912	3414.53	Rep (u*D)	h/D50	u*_sk/ws	897.571	3.23542e-05	0.683184	-0.579012	-0.449359	1.63537		242	0.742236	3562.88	u*/ws	Fr	tau_sk	0.0009541	0.0254713	28.1992	1.79784	1.88661	-0.105856
243	0.751912	3414.53	h/D50	u*_sk/ws	Rep (u*D)	897.571	3.23542e-05	0.683184	-0.449359	1.63537	-0.579012		243	0.742236	3562.88	Fr	tau_sk	u*/ws	0.0009541	0.0254713	28.1992	1.88661	-0.105856	1.79784
244	0.751912	3414.53	u*_sk/ws	h/D50	Rep (u*D)	897.571	3.23542e-05	0.683184	1.63537	-0.449359	-0.579012		244	0.742236	3562.88	tau_sk	Fr	u*/ws	0.0009541	0.0254713	28.1992	-0.105856	1.88661	1.79784
245	0.751912	3414.53	Rep (u*D)	u*_sk/ws	h/D50	897.571	3.23542e-05	0.683184	-0.579012	1.63537	-0.449359		245	0.742236	3562.88	u*/ws	tau_sk	Fr	0.0009541	0.0254713	28.1992	1.79784	-0.105856	1.88661
246	0.751912	3414.53	u*_sk/ws	Rep (u*D)	h/D50	897.571	3.23542e-05	0.683184	1.63537	-0.579012	-0.449359		246	0.742236	3562.88	tau_sk	u*/ws	Fr	0.0009541	0.0254713	28.1992	-0.105856	1.79784	1.88661
247	0.747917	3478.61	h/D50	u*_sk/ws	tau	31.2842	4.29239	5.29751e-05	-0.500988	2.11122	-0.305878		247	0.741402	3573.73	Fr	u*/ws	u*/ws	0.0207026	0.314449	0.104628	1.80668	-0.315974	2.04851
248	0.747917	3478.61	u*_sk/ws	h/D50	tau	31.2842	4.29239	5.29751e-05	2.11122	-0.500988	-0.305878		248	0.741402	3573.73	u*/ws	Fr	u*/ws	0.0207026	0.314449	0.104628	-0.315974	1.80668	2.04851
249	0.747917	3478.61	tau	h/D50	u*_sk/ws	31.2842	4.29239	5.29751e-05	-0.305878	-0.500988	2.11122		249	0.741402	3573.73	u*/ws	u*/ws	Fr	0.0207026	0.314449	0.104628	-0.315974	2.04851	1.80668
250	0.747917	3478.61	u*_sk/ws	tau	h/D50	31.2842	4.29239	5.29751e-05	2.11122	-0.305878	-0.500988		250	0.741402	3573.73	Fr	Fr	u*/ws	1.6279	0.00361451	0.115755	1.89219	-0.0854934	1.73256
251	0.747917	3478.61	tau	u*_sk/ws	h/D50	31.2842	4.29239	5.29751e-05	-0.305878	2.11122	-0.500988		251	0.741402	3573.73	Fr	u*/ws	Fr	1.6279	0.00361451	0.115755	1.89219	1.73256	-0.0854934
252	0.747917	3478.61	h/D50	tau	u*_sk/ws	31.2842	4.29239	5.29751e-05	-0.500988	-0.305878	2.11122		252	0.741402	3573.73	u*/ws	Fr	Fr	1.6279	0.00361451	0.115755	1.73256	1.89219	-0.0854934
253	0.74516	3528.31	S	u*_sk/ws	tau	0.369486	0.0639993	0.371243	0.551941	2.12327	-0.435219		253	0.738415	3619.1	Fr	u*/ws	did50	0.851089	1.00563e-05	44.2384	1.50547	1.76242	0.148165
254	0.74516	3528.31	u*_sk/ws	S	tau	0.369486	0.0639993	0.371243	2.12327	0.551941	-0.435219		254	0.738415	3619.1	did50	Fr	u*/ws	0.851089	1.00563e-05	44.2384	0.148165	1.50547	1.76242
255	0.74516	3528.31	S	tau	u*_sk/ws	0.369486	0.0639993	0.371243	0.551941	-0.435219	2.12327		255	0.738415	3619.1	Fr	did50	u*/ws	0.851089	1.00563e-05	44.2384	1.50547	0.148165	1.76242
256	0.74516	3528.31	tau	S	u*_sk/ws	0.369486	0.0639993	0.371243	-0.435219	0.551941	2.12327		256	0.738415	3619.1	did50	u*/ws	Fr	0.851089	1.00563e-05	44.2384	0.148165	1.76242	1.50547
257	0.74516	3528.31	u*_sk/ws	tau	S	0.369486	0.0639993	0.371243	2.12327	-0.435219	0.551941		257	0.738415	3619.1	u*/ws	did50	Fr	0.851089	1.00563e-05	44.2384	1.76242	0.148165	1.50547
258	0.74516	3528.31	tau	u*_sk/ws	S	0.369486	0.0639993	0.371243	-0.435219	2.12327	0.551941		258	0.738415	3619.1	u*/ws	Fr	did50	0.851089	1.00563e-05	44.2384	1.76242	1.50547	0.148165
259	0.744498	3534.78	did50	Rep	S	0.00738377	0.00136117	45846.5	-1.37092	-1.50306	0.633088		259	0.734797	3636.24	tau_sk	h/D50	u*_sk/ws	0.247807	10.0327	0.00136947	0.159052	-0.420123	1.8831
260	0.744498	3534.78	Rep	did50	S	0.00738377	0.00136117	45846.5	-1.50306	-1.37092	0.633088		260	0.734797	3636.24	u*_sk/ws	tau_sk	h/D50	0.247807	10.0327	0.00136947	1.8831	0.159052	-0.420123
261	0.744498	3534.78	did50	S	Rep	0.00738377	0.00136117	45846.5	-1.37092	0.633088	-1.50306		261	0.734797	3636.24	tau_sk	u*_sk/ws	h/D50	0.247807	10.0327	0.00136947	0.159052	1.8831	-0.420123
262	0.744498	3534.78	S	did50	Rep	0.00738377	0.00136117	45846.5	0.633088	-1.37092	-1.50306		262	0.734797	3636.24	h/D50	u*_sk/ws	tau_sk	0.247807	10.0327	0.00136947	-0.420123	1.8831	0.159052
263	0.744498	3534.78	Rep	S	did50	0.00738377	0.00136117	45846.5	-1.50306	0.633088	-1.37092		263	0.734797	3636.24	u*_sk/ws	h/D50	tau_sk	0.247807	10.0327	0.00136947	1.8831	-0.420123	0.159052
264	0.744498	3534.78	S	Rep	did50	0.00738377	0.00136117	45846.5	0.633088	-1.50306	-1.37092		264	0.734797	3636.24	h/D50	tau_sk	u*_sk/ws	0.247807	10.0327	0.00136947	-0.420123	0.159052	1.8831
265	0.743942	3530.27	h/D50	Rep	u*/ws	0.145751	13.0099	0.0451357	-0.622234	-0.989328	1.20418		265	0.735471	3656.29	Rep	S	u*/ws	1.83017	0.0594373	0.965204	-1.05388	0.660111	1.07452
266	0.743942	3530.27	Rep	h/D50	u*/ws	0.145751	13.0099	0.0451357	-0.989328	-0.622234	1.20418		266	0.735471	3656.29	S	Rep	u*/ws	1.83017	0.0594373	0.965204	0.660111	-1.05388	1.07452
267	0.743942	3530.27	h/D50	u*/ws	Rep	0.145751	13.0099	0.0451357	-0.622234	1.20418	-0.989328		267	0.735471	3656.29	Rep	u*/ws	S	1.83017	0.0594373	0.965204	-1.05388	1.07452	0.660111
268	0.743942	3530.27	u*/ws	h/D50	Rep	0.145751	13.0099	0.0451357	1.20418	-0.622234	-0.989328		268	0.735471	3656.29	u*/ws	Rep	S	1.83017	0.0594373	0.965204	1.07452	-1.05388	0.660111
269	0.743942	3530.27	Rep	u*/ws	h/D50	0.145751	13.0099	0.0451357	-0.989328	1.20418	-0.622234		269	0.735471	3656.29	S	u*/ws	Rep	1.83017	0.0594373	0.965204	0.660111	1.07452	-1.05388
270	0.743942	3530.27	u*/ws	Rep	h/D50	0.145751	13.0099	0.0451357	1.20418	-0.989328	-0.622234		270	0.735471	3656.29	u*/ws	S	Rep	1.83017	0.0594373	0.965204	1.07452	0.660111	-1.05388
271	0.741503	3575.19	Fr	u*/ws	u*/ws	0.0496996	0.152872	0.0926708	1.80988	-0.806604	2.51751		271	0.732797	3665.59	Rep (u*_sk D)	h/D50	u*_sk/ws	0.640562	1.93898e-05	311.392	0.0101008	-0.452624	1.99722
272	0.741503	3575.19	u*/ws	Fr	u*/ws	0.0496996	0.152872	0.0926708	-0.806604	1.80988	2.51751		272	0.732797	3665.59	u*_sk/ws	h/D50	Rep (u*_sk D)	0.640562	1.93898e-05	311.392	1.99722	-0.452624	0.0101008
273	0.741503	3575.19	u*/ws	u*/ws	Fr	0.0496996	0.152872	0.0926708	-0.806604	2.51751	1.80988		273	0.732797	3665.59	Rep (u*_sk D)	u*_sk/ws	h/D50	0.640562	1.93898e-05	311.392	0.0101008	1.99722	-0.452624
274	0.741503	3575.2	Fr	Fr	u*/ws	1.9613	0.00397261	0.0903672	2.34385	-0.533953	1.71089		274	0.732797	3665.59	u*_sk/ws	Rep (u*_sk D)	h/D50	0.640562	1.93898e-05	311.392	1.99722	0.0101008	-0.452624
275	0.741503	3575.2	Fr	u*/ws	Fr	1.9613	0.00397261	0.0903672	2.34385	1.71089	-0.533953		275	0.732797	3665.59	h/D50	Rep (u*_sk D)	u*_sk/ws	0.640562	1.93898e-05	311.392	-0.452624	0.0101008	1.99722
276	0.741503	3575.2	u*/ws	Fr	Fr	1.9613	0.00397261	0.0903672	1.71089	2.34385	-0.533953		276	0.732797	3665.59	h/D50	u*_sk/ws	Rep (u*_sk D)	0.640562	1.93898e-05	311.392	-0.452624	1.99722	0.0101008
277	0.740611	3587.09	tau_sk	Fr	u*/ws	0.0279189	2.36157e-05	1208.55	-0.000416224	1.89212	1.73608		277	0.732788	3665.65	h/D50	h/D50	u*_sk/ws	0.0744495	0.0108414	4.94196	0.420502	-0.873988	1.99223
278	0.740611	3587.09	Fr	u*/ws	tau_sk	0.0279189	2.36157e-05	1208.55	1.89212	1.73608	-0.000416224		278	0.732788	3665.65	h/D50	u*_sk/ws	h/D50	0.0744495	0.0108414	4.94196	0.420502	1.99223	-0.873988
279	0.740611	3587.09	u*/ws	Fr	tau_sk	0.0279189	2.36157e-05	1208.55	1.73608	1.89212	-0.000416224		279	0.732788	3665.65	u*_sk/ws	h/D50	h/D50	0.0744495	0.0108414	4.94196	1.99223	0.420502	-0.873988
280	0.740611	3587.09	Fr	tau_sk	u*/ws	0.0279189	2.36157e-05	1208.55	1.89212	-0.000416224	1.73608		280	0.732788	3665.65	h/D50	u*_sk/ws	u*_sk/ws	0.0526285	7.776	0.00974727	-0.453487	1.74965	0.242562
281	0.740611	3587.09	u*/ws	tau_sk	Fr	0.0279189	2.36157e-05	1208.55	1.73608	-0.000416224	1.89212		281	0.732788	3665.65	u*_sk/ws	h/D50	u*_sk/ws	0.0526285	7.776	0.00974727	1.74965	-0.453487	0.242562
282	0.740611	3587.09	tau_sk	u*/ws	Fr	0.0279189	2.36157e-05	1208.55	-0.000416224	1.73608	1.89212		282	0.732788	3665.65	u*_sk/ws	u*_sk/ws	h/D50	0.0526285	7.776	0.00974727	1.74965	0.242562	-0.453487
283	0.738156	3629.55	u*/ws	u*_sk/ws	tau_sk	3.82641	0.170683	0.000294524	-1.86823	3.40707	0.309132		283	0.731118	3696.47	h/D50	u*_sk/ws	S	211.266	0.00243763	0.00526043	-0.644508	1.97093	-0.247943
284	0.738156	3629.55	u*_sk/ws	u*/ws	tau_sk	3.82641	0.170683	0.000294524	3.40707	-1.86823	0.309132		284	0.731118	3696.47	S	u*_sk/ws	h/D50	211.266	0.00243763	0.00526043	-0.247943	1.97093	-0.644508
285	0.738156	3629.55	u*_sk/ws	tau_sk	u*/ws	3.82641	0.170683	0.000294524	3.40707	0.309132	-1.86823		285	0.731118	3696.47	u*_sk/ws	S	h/D50	211.266	0.00243763	0.00526043	1.97093	-0.247943	-0.644508
286	0.738156	3629.55	tau_sk	u*_sk/ws	u*/ws	3.82641	0.170683	0.000294524	0.309132	3.40707	-1.86823		286	0.731118	3696.47	h/D50	S	u*_sk/ws	211.266	0.00243763	0.00526043	-0.644508	-0.247943	1.97093
287	0.738156	3629.55	u*/ws	tau_sk	u*_sk/ws	3.82641	0.170683	0.000294524	-1.86823	0.309132	3.40707		287	0.731118	3696.47	S	h/D50	u*_sk/ws	211.266	0.00243763	0.00526043	-0.247943	-0.644508	1.97093
288	0.738156	3629.55	tau_sk	u*/ws	u*_sk/ws	3.82641	0.170683	0.000294524	0.309132	-1.86823	3.40707		288	0.731118	3696.47	u*_sk/ws	h/D50	S	211.266	0.00243763	0.00526043	1.97093	-0.644508	-0.247943
289	0.735726	3656.19	Rep	S	u*/ws	0.757032	0.0373706	3.24509	-1.06474	0.641538	1.05368		289	0.73068	3754.11	Rep (u*D)	u*_sk/ws	u*/ws	1.07238e-11	0.0320148	2.72325e+08	0.206339	4.04128	-2.20569
290	0.735726	3656.19	Rep	u*/ws	S	0.757032	0.0373706	3.24509	-1.06474	1.05368	0.641538		290	0.73068	3754.11	u*_sk/ws	Rep (u*D)	u*/ws	1.07238e-11	0.0320148	2.72325e+08	4.04128	0.206339	-2.20569
291	0.735726	3656.19	u*/ws	Rep	S	0.757032	0.0373706	3.24509	1.05368	-1.06474	0.641538		291	0.73068	3754.11	Rep (u*D)	u*/ws	u*_sk/ws	1.07238e-11	0.0320148	2.72325e+08	0.206339	-2.20569	4.04128
292	0.735726	3656.19	S	u*/ws	Rep	0.757032	0.0373706	3.24509	0.641538	1.05368	-1.06474		292	0.73068	3754.11	u*/ws	Rep (u*D)	u*_sk/ws	1.07238e-11	0.0320148	2.72325e+08	-2.20569	0.206339	4.04128
293	0.735726	3656.19	u*/ws	S	Rep	0.757032	0.0373706	3.24509	1.05368	0.641538	-1.06474		293	0.73068	3754.11	u*_sk/ws	u*/ws	Rep (u*D)	1.07238e-11	0.0320148	2.72325e+08	4.04128	-2.20569	0.206339
294	0.735726	3656.19	S	Rep	u*/ws	0.757032	0.0373706	3.24509	0.641538	-1.06474	1.05368		294	0.73068	3754.11	u*/ws	u*_sk/ws	Rep (u*D)	1.07238e-11	0.0320148	2.72325e+08	-2.20569	4.04128	0.206339
295	0.735586	3788.83	Fr	Rep (u*_sk D)	tau_sk	0.409038	2.71929	0.116265	1.34461	-1.81978	0.823552		295	0.73068	3754.11	Rep (u*D)	Rep (u*_sk D)	u*/ws	7.2016	1.09771	1.18272e-05	-3.83496	4.04129	1.83559
296	0.735586	3788.83	Rep (u*_sk D)	Fr	tau_sk	0.409038	2.71929	0.116265	-1.81978	1.34461	0.823552		296	0.73068	3754.11	Rep (u*D)	u*/ws	Rep (u*_sk D)	7.2016	1.09771	1.18272e-05	-3.83496	1.83559	4.04129
297	0.735586	3788.83	Fr	tau_sk	Rep (u*_sk D)	0.409038	2.71929	0.116265	1.34461	0.823552	-1.81978		297	0.73068	3754.11	Rep (u*_sk D)	Rep (u*D)	u*/ws	7.2016	1.09771	1.18272e-05	4.04129	-3.83496	1.83559
298	0.735586	3788.83	tau_sk	Fr	Rep (u*_sk D)	0.409038	2.71929	0.116265	0.823552	1.34461	-1.81978		298	0.73068	3754.11	Rep (u*_sk D)	u*/ws	Rep (u*D)	7.2016	1.09771	1.18272e-05	4.04129	1.83559	-3.83496
299	0.735586	3788.83	Rep (u*_sk D)	tau_sk	Fr	0.409038	2.71929	0.116265	-1.81978	0.823552	1.34461		299	0.73068	3754.11	u*/ws	Rep (u*_sk D)	Rep (u*D)	7.2016	1.09771	1.18272e-05	1.83559	4.04129	-3.83496
300	0.735586	3788.83	tau_sk	Rep (u*_sk D)	Fr	0.409038	2.71929	0.116265	0.823552	-1.81978	1.34461		300	0.73068	3754.11	u*/ws	Rep (u*D)	Rep (u*_sk D)	7.2016	1.09771	1.18272e-05	1.83559	-3.83496	4.04129
301	0.734832	3636.75	h/D50	u*_sk/ws	tau_sk	0.6564	0.512359	0.0102234	-0.419172	1.86621	0.162776		301	0.73068	3754.11	u*/ws	u*_sk/ws	Rep (u*_sk D)	1.34573e-05	0.256736	27.063	-1.99936	3.83494	0.206301
302	0.734832	3636.75	u*_sk/ws	h/D50	tau_sk	0.6564	0.512359	0.0102234	1.86621	-0.419172	0.162776		302	0.73068	3754.11	Rep (u*_sk D)	u*_sk/ws	u*/ws	1.34573e-05	0.256736	27.063	0.206301	3.83494	-1.99936
303	0.734832	3636.75	h/D50	tau_sk	u*_sk/ws	0.6564	0.512359	0.0102234	-0.419172	0.162776	1.86621		303	0.73068	3754.11	Rep (u*_sk D)	u*/ws	u*_sk/ws	1.34573e-05	0.256736	27.063	0.206301	-1.99936	3.83494
304	0.734832	3636.75	tau_sk	h/D50	u*_sk/ws	0.6564	0.512359	0.0102234	0.162776	-0.419172	1.86621		304	0.73068	3754.11	u*/ws	Rep (u*_sk D)	u*_sk/ws	1.34573e-05	0.256736	27.063	-1.99936	0.206301	3.83494
305	0.734832	3636.75	u*_sk/ws	tau_sk	h/D50	0.6564	0.512359	0.0102234	1.86621	0.162776	-0.419172		305	0.73068	3754.11	u*_sk/ws	u*/ws	Rep (u*_sk D)	1.34573e-05	0.256736	27.063	3.83494	-1.99936	0.206301
306	0.734832	3636.75	tau_sk	u*_sk/ws	h/D50	0.6564	0.512359	0.0102234	0.162776	1.86621	-0.419172		306	0.73068	3754.11	u*_sk/ws	Rep (u*_sk D)	u*/ws	1.34573e-05	0.256736	27.063	3.83494	0.206301	-1.99936
307	0.732826	3666.01	h/D50	Rep (u*_sk D)	u*_sk/ws	0.249834	0.00017981	82.7486	-0.448949	0.0163418	1.98885		307	0.730681	3754.11	Rep (u*_sk D)	Rep (u*D)	u*_sk/ws	2.69326e-37	85186.3	4.07561e+27	2.20572	-1.99942	1.83558
308	0.732826	3666.01	Rep (u*_sk D)	h/D50	u*_sk/ws	0.249834	0.00017981	82.7486	0.0163418	-0.448949	1.98885		308	0.730681	3754.11	Rep (u*D)	Rep (u*_sk D)	u*_sk/ws	2.69326e-37	85186.3	4.07561e+27	-1.99942	2.20572	1.83558
309	0.732826	3666.01	h/D50	u*_sk/ws	Rep (u*_sk D)	0.249834	0.00017981	82.7486	-0.448949	1.98885	0.0163418		309	0.730681	3754.11	Rep (u*_sk D)	u*_sk/ws	Rep (u*D)	2.69326e-37	85186.3	4.07561e+27	2.20572	1.83558	-1.99942
310	0.732826	3666.01	u*_sk/ws	h/D50	Rep (u*_sk D)	0.249834	0.00017981	82.7486	1.98885	-0.448949	0.0163418		310	0.730681	3754.11	u*_sk/ws	Rep (u*_sk D)	Rep (u*D)	2.69326e-37	85186.3	4.07561e+27	1.83558	2.20572	-1.99942
311	0.732826	3666.01	Rep (u*_sk D)	u*_sk/ws	h/D50	0.249834	0.00017981	82.7486	0.0163418	1.98885	-0.448949		311	0.730681	3754.11	u*_sk/ws	Rep (u*D)	Rep (u*_sk D)	2.69326e-37	85186.3	4.07561e+27	1.83558	-1.99942	2.20572
312	0.732826	3666.01	u*_sk/ws	Rep (u*_sk D)	h/D50	0.249834	0.00017981	82.7486	1.98885	0.0163418	-0.448949		312	0.730681	3754.11	Rep (u*D)	u*_sk/ws	Rep (u*_sk D)	2.69326e-37	85186.3	4.07561e+27	-1.99942	1.83558	2.20572
313	0.732815	3666.04	h/D50	h/D50	u*_sk/ws	0.387794	0.00522803	1.9265	0.449623	-0.899915	1.98086		313	0.729807	3766.6	h/D50	S	Rep (u*D)	4.60409e-06	0.0680657	6.12618e+07	1.52422	2.1862	-2.63082
314	0.732815	3666.04	h/D50	u*_sk/ws	h/D50	0.387794	0.00522803	1.9265	0.449623	1.98086	-0.899915		314	0.729807	3766.6	h/D50	Rep (u*D)	S	4.60409e-06	0.0680657	6.12618e+07	1.52422	-2.63082	2.1862
315	0.732815	3666.04	u*_sk/ws	h/D50	h/D50	0.387794	0.00522803	1.9265	1.98086	0.449623	-0.899915		315	0.729807	3766.6	Rep (u*D)	h/D50	S	4.60409e-06	0.0680657	6.12618e+07	-2.63082	1.52422	2.1862
316	0.732815	3666.03	h/D50	u*_sk/ws	u*_sk/ws	0.207691	0.428216	0.0439191	-0.4503	1.41645	0.564454		316	0.729807	3766.6	S	h/D50	Rep (u*D)	4.60409e-06	0.0680657	6.12618e+07	2.1862	1.52422	-2.63082
317	0.732815	3666.03	u*_sk/ws	h/D50	u*_sk/ws	0.207691	0.428216	0.0439191	1.41645	-0.4503	0.564454		317	0.729807	3766.6	Rep (u*D)	S	h/D50	4.60409e-06	0.0680657	6.12618e+07	-2.63082	2.1862	1.52422
318	0.732815	3666.03	u*_sk/ws	u*_sk/ws	h/D50	0.207691	0.428216	0.0439191	1.41645	0.564454	-0.4503		318	0.729807	3766.6	S	Rep (u*D)	h/D50	4.60409e-06	0.0680657	6.12618e+07	2.1862	-2.63082	1.52422
319	0.730847	3756.53	Rep (u*D)	u*_sk/ws	u*/ws	7.36159e+06	229.369	6.4158e-14	0.145698	3.97894	-2.17153		319	0.729829	3775.94	u*/ws	Rep	u*_sk/ws	0.117549	0.0113831	0.107561	-2.12791	0.0518747	3.88797
320	0.730847	3756.53	u*_sk/ws	Rep (u*D)	u*/ws	7.36159e+06	229.369	6.4158e-14	3.97894	0.145698	-2.17153		320	0.729829	3775.94	Rep	u*_sk/ws	u*/ws	0.117549	0.0113831	0.107561	0.0518747	3.88797	-2.12791
321	0.730847	3756.53	Rep (u*D)	u*/ws	u*_sk/ws	7.36159e+06	229.369	6.4158e-14	0.145698	-2.17153	3.97894		321	0.729829	3775.94	u*_sk/ws	Rep	u*/ws	0.117549	0.0113831	0.107561	3.88797	0.0518747	-2.12791
322	0.730847	3756.53	u*/ws	Rep (u*D)	u*_sk/ws	7.36159e+06	229.369	6.4158e-14	-2.17153	0.145698	3.97894		322	0.729829	3775.94	Rep	u*/ws	u*_sk/ws	0.117549	0.0113831	0.107561	0.0518747	-2.12791	3.88797
323	0.730847	3756.53	u*_sk/ws	u*/ws	Rep (u*D)	7.36159e+06	229.369	6.4158e-14	3.97894	-2.17153	0.145698		323	0.729829	3775.94	u*_sk/ws	u*/ws	Rep	0.117549	0.0113831	0.107561	3.88797	-2.12791	0.0518747
324	0.730847	3756.53	u*/ws	u*_sk/ws	Rep (u*D)	7.36159e+06	229.369	6.4158e-14	-2.17153	3.97894	0.145698		324	0.729829	3775.94	u*/ws	u*_sk/ws	Rep	0.117549	0.0113831	0.107561	-2.12791	3.88797	0.0518747
325	0.730847	3756.53	Rep (u*_sk D)	Rep (u*D)	u*_sk/ws	1.0628e-08	7.99685e-13	1.27464e+16	2.17152	-2.02582	1.80741		325	0.729931	3780.33	did50	u*/ws	u*_sk/ws	24.454	7.01555e-05	0.0878157	0.013244	-2.03886	3.7721
326	0.730847	3756.53	Rep (u*D)	Rep (u*_sk D)	u*_sk/ws	1.0628e-08	7.99685e-13	1.27464e+16	-2.02582	2.17152	1.80741		326	0.729931	3780.33	did50	u*_sk/ws	u*/ws	24.454	7.01555e-05	0.0878157	0.013244	3.7721	-2.03886
327	0.730847	3756.53	Rep (u*_sk D)	u*_sk/ws	Rep (u*D)	1.0628e-08	7.99685e-13	1.27464e+16	2.17152	1.80741	-2.02582		327	0.729931	3780.33	u*_sk/ws	did50	u*/ws	24.454	7.01555e-05	0.0878157	3.7721	0.013244	-2.03886
328	0.730847	3756.53	u*_sk/ws	Rep (u*_sk D)	Rep (u*D)	1.0628e-08	7.99685e-13	1.27464e+16	1.80741	2.17152	-2.02582		328	0.729931	3780.33	u*/ws	did50	u*_sk/ws	24.454	7.01555e-05	0.0878157	-2.03886	0.013244	3.7721
329	0.730847	3756.53	Rep (u*D)	u*_sk/ws	Rep (u*_sk D)	1.0628e-08	7.99685e-13	1.27464e+16	-2.02582	1.80741	2.17152		329	0.729931	3780.33	u*_sk/ws	u*/ws	did50	24.454	7.01555e-05	0.0878157	3.7721	-2.03886	0.013244
330	0.730847	3756.53	u*_sk/ws	Rep (u*D)	Rep (u*_sk D)	1.0628e-08	7.99685e-13	1.27464e+16	1.80741	-2.02582	2.17152		330	0.729931	3780.33	u*/ws	u*_sk/ws	did50	24.454	7.01555e-05	0.0878157	-2.03886	3.7721	0.013244
331	0.730847	3756.53	Rep (u*_sk D)	u*_sk/ws	u*/ws	1.19165e-07	3.88684	233.894	0.145692	3.8332	-2.0258		331	0.72991	3780.39	u*_sk/ws	u*/ws	u*/ws	6.61547e-08	1338.56	1.71936	3.77911	0.0519774	-2.10511
332	0.730847	3756.53	u*_sk/ws	Rep (u*_sk D)	u*/ws	1.19165e-07	3.88684	233.894	3.8332	0.145692	-2.0258		332	0.72991	3780.39	u*/ws	u*_sk/ws	u*/ws	6.61547e-08	1338.56	1.71936	0.0519774	3.77911	-2.10511
333	0.730847	3756.53	Rep (u*_sk D)	u*/ws	u*_sk/ws	1.19165e-07	3.88684	233.894	0.145692	-2.0258	3.8332		333	0.72991	3780.39	u*/ws	u*/ws	u*_sk/ws	6.61547e-08	1338.56	1.71936	0.0519774	-2.10511	3.77911
334	0.730847	3756.53	u*/ws	Rep (u*_sk D)	u*_sk/ws	1.19165e-07	3.88684	233.894	-2.0258	0.145692	3.8332		334	0.72991	3780.39	u*_sk/ws	u*_sk/ws	u*/ws	0.531102	0.0207617	0.0138076	2.14962	1.62951	-2.05314
335	0.730847	3756.53	u*_sk/ws	u*/ws	Rep (u*_sk D)	1.19165e-07	3.88684	233.894	3.8332	-2.0258	0.145692		335	0.72991	3780.39	u*_sk/ws	u*/ws	u*_sk/ws	0.531102	0.0207617	0.0138076	2.14962	-2.05314	1.62951
336	0.730847	3756.53	u*/ws	u*_sk/ws	Rep (u*_sk D)	1.19165e-07	3.88684	233.894	-2.0258	3.8332	0.145692		336	0.72991	3780.39	u*/ws	u*_sk/ws	u*_sk/ws	0.531102	0.0207617	0.0138076	-2.05314	2.14962	1.62951
337	0.730847	3756.53	Rep (u*D)	Rep (u*_sk D)	u*/ws	7.37673	0.0068164	0.00215448	-3.83323	3.97891	1.80742		337	0.734978	3784.91	Fr	Rep (u*_sk D)	tau_sk	0.801007	1.86093	0.0831119	1.31743	-1.84198	0.785988
338	0.730847	3756.53	u*/ws	Rep (u*_sk D)	Rep (u*D)	7.37673	0.0068164	0.00215448	1.80742	3.97891	-3.83323		338	0.734978	3784.91	Fr	tau_sk	Rep (u*_sk D)	0.801007	1.86093	0.0831119	1.31743	0.785988	-1.84198
339	0.730847	3756.53	Rep (u*D)	u*/ws	Rep (u*_sk D)	7.37673	0.0068164	0.00215448	-3.83323	1.80742	3.97891		339	0.734978	3784.91	Rep (u*_sk D)	Fr	tau_sk	0.801007	1.86093	0.0831119	-1.84198	1.31743	0.785988
340	0.730847	3756.53	u*/ws	Rep (u*D)	Rep (u*_sk D)	7.37673	0.0068164	0.00215448	1.80742	-3.83323	3.97891		340	0.734978	3784.91	tau_sk	Fr	Rep (u*_sk D)	0.801007	1.86093	0.0831119	0.785988	1.31743	-1.84198
341	0.730847	3756.53	Rep (u*_sk D)	Rep (u*D)	u*/ws	7.37673	0.0068164	0.00215448	3.97891	-3.83323	1.80742		341	0.734978	3784.91	Rep (u*_sk D)	tau_sk	Fr	0.801007	1.86093	0.0831119	-1.84198	0.785988	1.31743
342	0.730847	3756.53	Rep (u*_sk D)	u*/ws	Rep (u*D)	7.37673	0.0068164	0.00215448	3.97891	1.80742	-3.83323		342	0.734978	3784.91	tau_sk	Rep (u*_sk D)	Fr	0.801007	1.86093	0.0831119	0.785988	-1.84198	1.31743
343	0.73063	3704.28	h/D50	S	u*_sk/ws	374.178	0.000979463	0.00721995	-0.656764	-0.264697	1.96252		343	0.720362	3837.83	Rep (u*_sk D)	S	u*_sk/ws	0.21774	13.4494	0.00286049	-0.303005	0.490992	1.80736
344	0.73063	3704.28	S	h/D50	u*_sk/ws	374.178	0.000979463	0.00721995	-0.264697	-0.656764	1.96252		344	0.720362	3837.83	S	Rep (u*_sk D)	u*_sk/ws	0.21774	13.4494	0.00286049	0.490992	-0.303005	1.80736
345	0.73063	3704.28	h/D50	u*_sk/ws	S	374.178	0.000979463	0.00721995	-0.656764	1.96252	-0.264697		345	0.720362	3837.83	u*_sk/ws	Rep (u*_sk D)	S	0.21774	13.4494	0.00286049	1.80736	-0.303005	0.490992
346	0.73063	3704.28	u*_sk/ws	h/D50	S	374.178	0.000979463	0.00721995	1.96252	-0.656764	-0.264697		346	0.720362	3837.83	S	u*_sk/ws	Rep (u*_sk D)	0.21774	13.4494	0.00286049	0.490992	1.80736	-0.303005
347	0.73063	3704.28	S	u*_sk/ws	h/D50	374.178	0.000979463	0.00721995	-0.264697	1.96252	-0.656764		347	0.720362	3837.83	Rep (u*_sk D)	u*_sk/ws	S	0.21774	13.4494	0.00286049	-0.303005	1.80736	0.490992
348	0.73063	3704.28	u*_sk/ws	S	h/D50	374.178	0.000979463	0.00721995	1.96252	-0.264697	-0.656764		348	0.720362	3837.83	u*_sk/ws	S	Rep (u*_sk D)	0.21774	13.4494	0.00286049	1.80736	0.490992	-0.303005
349	0.729969	3777.99	Rep	u*_sk/ws	u*/ws	0.0231062	0.278762	0.023305	0.0188818	3.83747	-2.09447		349	0.718998	3858.01	S	u*_sk/ws	tau_sk	0.234065	1.68728	0.00608251	0.411334	1.8569	0.15127
350	0.729969	3777.99	u*_sk/ws	Rep	u*/ws	0.0231062	0.278762	0.023305	3.83747	0.0188818	-2.09447		350	0.718998	3858.01	u*_sk/ws	S	tau_sk	0.234065	1.68728	0.00608251	1.8569	0.411334	0.15127
351	0.729969	3777.99	Rep	u*/ws	u*_sk/ws	0.0231062	0.278762	0.023305	0.0188818	-2.09447	3.83747		351	0.718998	3858.01	S	tau_sk	u*_sk/ws	0.234065	1.68728	0.00608251	0.411334	0.15127	1.8569
352	0.729969	3777.99	u*/ws	Rep	u*_sk/ws	0.0231062	0.278762	0.023305	-2.09447	0.0188818	3.83747		352	0.718998	3858.01	tau_sk	S	u*_sk/ws	0.234065	1.68728	0.00608251	0.15127	0.411334	1.8569
353	0.729969	3777.99	u*_sk/ws	u*/ws	Rep	0.0231062	0.278762	0.023305	3.83747	-2.09447	0.0188818		353	0.718998	3858.01	u*_sk/ws	tau_sk	S	0.234065	1.68728	0.00608251	1.8569	0.15127	0.411334
354	0.729969	3777.99	u*/ws	u*_sk/ws	Rep	0.0231062	0.278762	0.023305	-2.09447	3.83747	0.0188818		354	0.718998	3858.01	tau_sk	u*_sk/ws	S	0.234065	1.68728	0.00608251	0.15127	1.8569	0.411334
355	0.729965	3780.83	did50	u*_sk/ws	u*/ws	0.581348	4.24242e-09	60225.3	0.0387784	3.77815	-2.02591		355	0.717552	3882.9	S	u*_sk/ws	S	0.204128	0.00428076	3.28498	0.553673	1.95854	-0.105616
356	0.729965	3780.83	u*_sk/ws	did50	u*/ws	0.581348	4.24242e-09	60225.3	3.77815	0.0387784	-2.02591		356	0.717552	3882.9	u*_sk/ws	S	S	0.204128	0.00428076	3.28498	1.95854	0.553673	-0.105616
357	0.729965	3780.83	did50	u*/ws	u*_sk/ws	0.581348	4.24242e-09	60225.3	0.0387784	-2.02591	3.77815		357	0.717552	3882.9	S	S	u*_sk/ws	0.204128	0.00428076	3.28498	0.553673	-0.105616	1.95854
358	0.729965	3780.83	u*/ws	did50	u*_sk/ws	0.581348	4.24242e-09	60225.3	-2.02591	0.0387784	3.77815		358	0.717552	3882.9	S	u*_sk/ws	u*_sk/ws	0.302081	0.688141	0.0138112	0.448075	0.913961	1.04457
359	0.729965	3780.83	u*_sk/ws	u*/ws	did50	0.581348	4.24242e-09	60225.3	3.77815	-2.02591	0.0387784		359	0.717552	3882.9	u*_sk/ws	S	u*_sk/ws	0.302081	0.688141	0.0138112	0.913961	0.448075	1.04457
360	0.729965	3780.83	u*/ws	u*_sk/ws	did50	0.581348	4.24242e-09	60225.3	-2.02591	3.77815	0.0387784		360	0.717552	3882.9	u*_sk/ws	u*_sk/ws	S	0.302081	0.688141	0.0138112	0.913961	1.04457	0.448075
361	0.729928	3780.66	u*_sk/ws	u*/ws	u*/ws	7.71223e-08	1688.53	1.17662	3.79848	0.15847	-2.22612		361	0.717293	3931.38	h/D50	tau	u*_sk/ws	0.0150226	0.268087	0.281271	-0.298959	-0.194193	1.81728
362	0.729928	3780.66	u*/ws	u*_sk/ws	u*/ws	7.71223e-08	1688.53	1.17662	0.15847	3.79848	-2.22612		362	0.717293	3931.38	tau	h/D50	u*_sk/ws	0.0150226	0.268087	0.281271	-0.194193	-0.298959	1.81728
363	0.729928	3780.66	u*/ws	u*/ws	u*_sk/ws	7.71223e-08	1688.53	1.17662	0.15847	-2.22612	3.79848		363	0.717293	3931.38	u*_sk/ws	tau	h/D50	0.0150226	0.268087	0.281271	1.81728	-0.194193	-0.298959
364	0.729928	3780.66	u*_sk/ws	u*_sk/ws	u*/ws	0.495611	0.0220176	0.0140423	2.1851	1.61343	-2.0677		364	0.717293	3931.38	tau	u*_sk/ws	h/D50	0.0150226	0.268087	0.281271	-0.194193	1.81728	-0.298959
365	0.729928	3780.66	u*_sk/ws	u*/ws	u*_sk/ws	0.495611	0.0220176	0.0140423	2.1851	-2.0677	1.61343		365	0.717293	3931.38	h/D50	u*_sk/ws	tau	0.0150226	0.268087	0.281271	-0.298959	1.81728	-0.194193
366	0.729928	3780.66	u*/ws	u*_sk/ws	u*_sk/ws	0.495611	0.0220176	0.0140423	-2.0677	2.1851	1.61343		366	0.717293	3931.38	u*_sk/ws	h/D50	tau	0.0150226	0.268087	0.281271	1.81728	-0.298959	-0.194193
367	0.729815	3766.82	h/D50	Rep (u*D)	S	6.55376e-07	0.0157937	1.82251e+09	1.51927	-2.63316	2.1784		367	0.71607	3945.99	did50	Rep	h/D50	0.0206507	0.000346365	42488.4	-1.41714	-1.4489	-0.555973
368	0.729815	3766.82	Rep (u*D)	h/D50	S	6.55376e-07	0.0157937	1.82251e+09	-2.63316	1.51927	2.1784		368	0.71607	3945.99	h/D50	did50	Rep	0.0206507	0.000346365	42488.4	-0.555973	-1.41714	-1.4489
369	0.729815	3766.82	h/D50	S	Rep (u*D)	6.55376e-07	0.0157937	1.82251e+09	1.51927	2.1784	-2.63316		369	0.71607	3945.99	Rep	did50	h/D50	0.0206507	0.000346365	42488.4	-1.4489	-1.41714	-0.555973
370	0.729815	3766.82	S	h/D50	Rep (u*D)	6.55376e-07	0.0157937	1.82251e+09	2.1784	1.51927	-2.63316		370	0.71607	3945.99	h/D50	Rep	did50	0.0206507	0.000346365	42488.4	-0.555973	-1.4489	-1.41714
371	0.729815	3766.82	Rep (u*D)	S	h/D50	6.55376e-07	0.0157937	1.82251e+09	-2.63316	2.1784	1.51927		371	0.71607	3945.99	did50	h/D50	Rep	0.0206507	0.000346365	42488.4	-1.41714	-0.555973	-1.4489
372	0.729815	3766.82	S	Rep (u*D)	h/D50	6.55376e-07	0.0157937	1.82251e+09	2.1784	-2.63316	1.51927		372	0.71607	3945.99	Rep	h/D50	did50	0.0206507	0.000346365	42488.4	-1.4489	-0.555973	-1.41714
373	0.723052	3983.74	Rep (u*D)	S	tau_sk	5.24222	0.411071	0.428751	-1.71256	0.398755	0.930811		373	0.712418	3966.09	did50	u*_sk/ws	tau_sk	0.0022711	0.0241102	1.30737	1.00269	1.9888	0.586378
374	0.723052	3983.74	S	Rep (u*D)	tau_sk	5.24222	0.411071	0.428751	0.398755	-1.71256	0.930811		374	0.712418	3966.09	u*_sk/ws	tau_sk	did50	0.0022711	0.0241102	1.30737	1.9888	0.586378	1.00269
375	0.723052	3983.74	Rep (u*D)	tau_sk	S	5.24222	0.411071	0.428751	-1.71256	0.930811	0.398755		375	0.712418	3966.09	tau_sk	u*_sk/ws	did50	0.0022711	0.0241102	1.30737	0.586378	1.9888	1.00269
376	0.723052	3983.74	tau_sk	Rep (u*D)	S	5.24222	0.411071	0.428751	0.930811	-1.71256	0.398755		376	0.712418	3966.09	u*_sk/ws	did50	tau_sk	0.0022711	0.0241102	1.30737	1.9888	1.00269	0.586378
377	0.723052	3983.74	S	tau_sk	Rep (u*D)	5.24222	0.411071	0.428751	0.398755	0.930811	-1.71256		377	0.712418	3966.09	did50	tau_sk	u*_sk/ws	0.0022711	0.0241102	1.30737	1.00269	0.586378	1.9888
378	0.723052	3983.74	tau_sk	S	Rep (u*D)	5.24222	0.411071	0.428751	0.930811	0.398755	-1.71256		378	0.712418	3966.09	tau_sk	did50	u*_sk/ws	0.0022711	0.0241102	1.30737	0.586378	1.00269	1.9888
379	0.720429	3838.81	Rep (u*_sk D)	S	u*_sk/ws	509.454	0.00083755	0.0176458	-0.282048	0.483455	1.80369		379	0.71463	4012.63	did50	Fr	Rep (u*D)	5.84717	0.124807	0.139362	-1.16631	1.51264	-1.4728
380	0.720429	3838.81	S	Rep (u*_sk D)	u*_sk/ws	509.454	0.00083755	0.0176458	0.483455	-0.282048	1.80369		380	0.71463	4012.63	Fr	did50	Rep (u*D)	5.84717	0.124807	0.139362	1.51264	-1.16631	-1.4728
381	0.720429	3838.81	Rep (u*_sk D)	u*_sk/ws	S	509.454	0.00083755	0.0176458	-0.282048	1.80369	0.483455		381	0.71463	4012.63	did50	Rep (u*D)	Fr	5.84717	0.124807	0.139362	-1.16631	-1.4728	1.51264
382	0.720429	3838.81	u*_sk/ws	Rep (u*_sk D)	S	509.454	0.00083755	0.0176458	1.80369	-0.282048	0.483455		382	0.71463	4012.63	Rep (u*D)	did50	Fr	5.84717	0.124807	0.139362	-1.4728	-1.16631	1.51264
383	0.720429	3838.81	S	u*_sk/ws	Rep (u*_sk D)	509.454	0.00083755	0.0176458	0.483455	1.80369	-0.282048		383	0.71463	4012.63	Fr	Rep (u*D)	did50	5.84717	0.124807	0.139362	1.51264	-1.4728	-1.16631
384	0.720429	3838.81	u*_sk/ws	S	Rep (u*_sk D)	509.454	0.00083755	0.0176458	1.80369	0.483455	-0.282048		384	0.71463	4012.63	Rep (u*D)	Fr	did50	5.84717	0.124807	0.139362	-1.4728	1.51264	-1.16631
385	0.717615	3883.83	S	S	u*_sk/ws	0.713557	0.00144178	2.71509	1.32465	-0.880511	1.94328		385	0.707943	4020.58	Rep (u*D)	u*/ws	S	4.8567	2.23394	0.102156	-1.65742	0.858334	0.616984
386	0.717615	3883.83	S	u*_sk/ws	S	0.713557	0.00144178	2.71509	1.32465	1.94328	-0.880511		386	0.707943	4020.58	Rep (u*D)	S	u*/ws	4.8567	2.23394	0.102156	-1.65742	0.616984	0.858334
387	0.717615	3883.83	u*_sk/ws	S	S	0.713557	0.00144178	2.71509	1.94328	1.32465	-0.880511		387	0.707943	4020.58	S	Rep (u*D)	u*/ws	4.8567	2.23394	0.102156	0.616984	-1.65742	0.858334
388	0.717615	3883.83	S	u*_sk/ws	u*_sk/ws	0.209649	0.354815	0.0375525	0.444151	0.591152	1.35214		388	0.707943	4020.58	u*/ws	Rep (u*D)	S	4.8567	2.23394	0.102156	0.858334	-1.65742	0.616984
389	0.717615	3883.83	u*_sk/ws	S	u*_sk/ws	0.209649	0.354815	0.0375525	0.591152	0.444151	1.35214		389	0.707943	4020.58	S	u*/ws	Rep (u*D)	4.8567	2.23394	0.102156	0.616984	0.858334	-1.65742
390	0.717615	3883.83	u*_sk/ws	u*_sk/ws	S	0.209649	0.354815	0.0375525	0.591152	1.35214	0.444151		390	0.707943	4020.58	u*/ws	S	Rep (u*D)	4.8567	2.23394	0.102156	0.858334	0.616984	-1.65742
391	0.716956	3889.58	S	u*_sk/ws	tau_sk	0.774241	5.38389	0.000968091	0.482215	1.94558	0.0124377		391	0.708643	4039.71	Rep	u*_sk/ws	tau_sk	111240	0.00112774	2.4329e-06	-0.556324	0.970033	0.78778
392	0.716956	3889.58	u*_sk/ws	S	tau_sk	0.774241	5.38389	0.000968091	1.94558	0.482215	0.0124377		392	0.708643	4039.71	u*_sk/ws	Rep	tau_sk	111240	0.00112774	2.4329e-06	0.970033	-0.556324	0.78778
393	0.716956	3889.58	S	tau_sk	u*_sk/ws	0.774241	5.38389	0.000968091	0.482215	0.0124377	1.94558		393	0.708643	4039.71	Rep	tau_sk	u*_sk/ws	111240	0.00112774	2.4329e-06	-0.556324	0.78778	0.970033
394	0.716956	3889.58	tau_sk	S	u*_sk/ws	0.774241	5.38389	0.000968091	0.0124377	0.482215	1.94558		394	0.708643	4039.71	tau_sk	Rep	u*_sk/ws	111240	0.00112774	2.4329e-06	0.78778	-0.556324	0.970033
395	0.716956	3889.58	u*_sk/ws	tau_sk	S	0.774241	5.38389	0.000968091	1.94558	0.0124377	0.482215		395	0.708643	4039.71	u*_sk/ws	tau_sk	Rep	111240	0.00112774	2.4329e-06	0.970033	0.78778	-0.556324
396	0.716956	3889.58	tau_sk	u*_sk/ws	S	0.774241	5.38389	0.000968091	0.0124377	1.94558	0.482215		396	0.708643	4039.71	tau_sk	u*_sk/ws	Rep	111240	0.00112774	2.4329e-06	0.78778	0.970033	-0.556324
397	0.716211	3948.04	did50	h/D50	Rep	0.0112894	0.104285	254.735	-1.39292	-0.551642	-1.46057		397	0.719242	4054.04	Rep (u*D)	S	tau_sk	0.145078	6.73048	1.17806	-1.64164	0.436475	0.97709
398	0.716211	3948.04	h/D50	did50	Rep	0.0112894	0.104285	254.735	-0.551642	-1.39292	-1.46057		398	0.719242	4054.04	S	Rep (u*D)	tau_sk	0.145078	6.73048	1.17806	0.436475	-1.64164	0.97709
399	0.716211	3948.04	did50	Rep	h/D50	0.0112894	0.104285	254.735	-1.39292	-1.46057	-0.551642		399	0.719242	4054.04	Rep (u*D)	tau_sk	S	0.145078	6.73048	1.17806	-1.64164	0.97709	0.436475
400	0.716211	3948.04	Rep	did50	h/D50	0.0112894	0.104285	254.735	-1.46057	-1.39292	-0.551642		400	0.719242	4054.04	tau_sk	Rep (u*D)	S	0.145078	6.73048	1.17806	0.97709	-1.64164	0.436475
401	0.716211	3948.04	h/D50	Rep	did50	0.0112894	0.104285	254.735	-0.551642	-1.46057	-1.39292		401	0.719242	4054.04	S	tau_sk	Rep (u*D)	0.145078	6.73048	1.17806	0.436475	0.97709	-1.64164
402	0.716211	3948.04	Rep	h/D50	did50	0.0112894	0.104285	254.735	-1.46057	-0.551642	-1.39292		402	0.719242	4054.04	tau_sk	S	Rep (u*D)	0.145078	6.73048	1.17806	0.97709	0.436475	-1.64164
403	0.714725	4014.02	did50	Fr	Rep (u*D)	0.0480321	2364.25	0.000948323	-1.14513	1.52068	-1.48402		403	0.712404	4139.29	Rep (u*D)	Fr	tau_sk	146.548	5.13537e-08	5547.37	-1.44912	0.668997	0.894365
404	0.714725	4014.02	Rep (u*D)	did50	Fr	0.0480321	2364.25	0.000948323	-1.48402	-1.14513	1.52068		404	0.712404	4139.29	Fr	Rep (u*D)	tau_sk	146.548	5.13537e-08	5547.37	0.668997	-1.44912	0.894365
405	0.714725	4014.02	Fr	did50	Rep (u*D)	0.0480321	2364.25	0.000948323	1.52068	-1.14513	-1.48402		405	0.712404	4139.29	Fr	tau_sk	Rep (u*D)	146.548	5.13537e-08	5547.37	0.668997	0.894365	-1.44912
406	0.714725	4014.02	did50	Rep (u*D)	Fr	0.0480321	2364.25	0.000948323	-1.14513	-1.48402	1.52068		406	0.712404	4139.29	tau_sk	Fr	Rep (u*D)	146.548	5.13537e-08	5547.37	0.894365	0.668997	-1.44912
407	0.714725	4014.02	Fr	Rep (u*D)	did50	0.0480321	2364.25	0.000948323	1.52068	-1.48402	-1.14513		407	0.712404	4139.29	Rep (u*D)	tau_sk	Fr	146.548	5.13537e-08	5547.37	-1.44912	0.894365	0.668997
408	0.714725	4014.02	Rep (u*D)	Fr	did50	0.0480321	2364.25	0.000948323	-1.48402	1.52068	-1.14513		408	0.712404	4139.29	tau_sk	Rep (u*D)	Fr	146.548	5.13537e-08	5547.37	0.894365	-1.44912	0.668997
409	0.712684	4143.5	Fr	Rep (u*D)	tau_sk	0.0116295	2.22716e+08	1.70199e-08	0.686205	-1.44905	0.921085		409	0.704183	4140.52	did50	Fr	Rep (u*_sk D)	7.47264e+07	1.48797e-05	0.00023091	-0.836819	2.0324	-1.81903
410	0.712684	4143.5	Rep (u*D)	Fr	tau_sk	0.0116295	2.22716e+08	1.70199e-08	-1.44905	0.686205	0.921085		410	0.704183	4140.52	Fr	did50	Rep (u*_sk D)	7.47264e+07	1.48797e-05	0.00023091	2.0324	-0.836819	-1.81903
411	0.712684	4143.5	Fr	tau_sk	Rep (u*D)	0.0116295	2.22716e+08	1.70199e-08	0.686205	0.921085	-1.44905		411	0.704183	4140.52	did50	Rep (u*_sk D)	Fr	7.47264e+07	1.48797e-05	0.00023091	-0.836819	-1.81903	2.0324
412	0.712684	4143.5	tau_sk	Fr	Rep (u*D)	0.0116295	2.22716e+08	1.70199e-08	0.921085	0.686205	-1.44905		412	0.704183	4140.52	Rep (u*_sk D)	did50	Fr	7.47264e+07	1.48797e-05	0.00023091	-1.81903	-0.836819	2.0324
413	0.712684	4143.5	Rep (u*D)	tau_sk	Fr	0.0116295	2.22716e+08	1.70199e-08	-1.44905	0.921085	0.686205		413	0.704183	4140.52	Fr	Rep (u*_sk D)	did50	7.47264e+07	1.48797e-05	0.00023091	2.0324	-1.81903	-0.836819
414	0.712684	4143.5	tau_sk	Rep (u*D)	Fr	0.0116295	2.22716e+08	1.70199e-08	0.921085	-1.44905	0.686205		414	0.704183	4140.52	Rep (u*_sk D)	Fr	did50	7.47264e+07	1.48797e-05	0.00023091	-1.81903	2.0324	-0.836819
415	0.708734	4041.01	Rep	u*_sk/ws	tau_sk	6278.01	0.00469087	1.10718e-05	-0.576163	0.937584	0.796046		415	0.697647	4157.86	h/D50	did50	u*/ws	0.00419588	580.557	0.00314943	-0.717814	2.41006	3.16832
416	0.708734	4041.01	u*_sk/ws	Rep	tau_sk	6278.01	0.00469087	1.10718e-05	0.937584	-0.576163	0.796046		416	0.697647	4157.86	did50	h/D50	u*/ws	0.00419588	580.557	0.00314943	2.41006	-0.717814	3.16832
417	0.708734	4041.01	Rep	tau_sk	u*_sk/ws	6278.01	0.00469087	1.10718e-05	-0.576163	0.796046	0.937584		417	0.697647	4157.86	did50	u*/ws	h/D50	0.00419588	580.557	0.00314943	2.41006	3.16832	-0.717814
418	0.708734	4041.01	tau_sk	Rep	u*_sk/ws	6278.01	0.00469087	1.10718e-05	0.796046	-0.576163	0.937584		418	0.697647	4157.86	u*/ws	did50	h/D50	0.00419588	580.557	0.00314943	3.16832	2.41006	-0.717814
419	0.708734	4041.01	u*_sk/ws	tau_sk	Rep	6278.01	0.00469087	1.10718e-05	0.937584	0.796046	-0.576163		419	0.697647	4157.86	h/D50	u*/ws	did50	0.00419588	580.557	0.00314943	-0.717814	3.16832	2.41006
420	0.708734	4041.01	tau_sk	u*_sk/ws	Rep	6278.01	0.00469087	1.10718e-05	0.796046	0.937584	-0.576163		420	0.697647	4157.86	u*/ws	h/D50	did50	0.00419588	580.557	0.00314943	3.16832	-0.717814	2.41006
421	0.707277	4041.45	did50	u*_sk/ws	tau_sk	0.00141163	8.66848	0.00653919	1.24193	2.02205	0.707362		421	0.69846	4198.3	tau_sk	Rep (u*D)	u*_sk/ws	0.000142559	2.11341	4.0028	0.821478	-0.864122	0.871662
422	0.707277	4041.45	u*_sk/ws	did50	tau_sk	0.00141163	8.66848	0.00653919	2.02205	1.24193	0.707362		422	0.69846	4198.3	tau_sk	u*_sk/ws	Rep (u*D)	0.000142559	2.11341	4.0028	0.821478	0.871662	-0.864122
423	0.707277	4041.45	did50	tau_sk	u*_sk/ws	0.00141163	8.66848	0.00653919	1.24193	0.707362	2.02205		423	0.69846	4198.3	Rep (u*D)	u*_sk/ws	tau_sk	0.000142559	2.11341	4.0028	-0.864122	0.871662	0.821478
424	0.707277	4041.45	tau_sk	did50	u*_sk/ws	0.00141163	8.66848	0.00653919	0.707362	1.24193	2.02205		424	0.69846	4198.3	u*_sk/ws	Rep (u*D)	tau_sk	0.000142559	2.11341	4.0028	0.871662	-0.864122	0.821478
425	0.707277	4041.45	u*_sk/ws	tau_sk	did50	0.00141163	8.66848	0.00653919	2.02205	0.707362	1.24193		425	0.69846	4198.3	Rep (u*D)	tau_sk	u*_sk/ws	0.000142559	2.11341	4.0028	-0.864122	0.821478	0.871662
426	0.707277	4041.45	tau_sk	u*_sk/ws	did50	0.00141163	8.66848	0.00653919	0.707362	2.02205	1.24193		426	0.69846	4198.3	u*_sk/ws	tau_sk	Rep (u*D)	0.000142559	2.11341	4.0028	0.871662	0.821478	-0.864122
427	0.706972	4038.79	S	u*/ws	Rep (u*D)	3.46809	1.45901	0.158846	0.581776	0.842285	-1.64967		427	0.705742	4203.04	Rep	S	tau_sk	0.0719452	0.0234244	27.3989	-1.07144	0.34738	0.960558
428	0.706972	4038.79	Rep (u*D)	S	u*/ws	3.46809	1.45901	0.158846	-1.64967	0.581776	0.842285		428	0.705742	4203.04	S	Rep	tau_sk	0.0719452	0.0234244	27.3989	0.34738	-1.07144	0.960558
429	0.706972	4038.79	S	Rep (u*D)	u*/ws	3.46809	1.45901	0.158846	0.581776	-1.64967	0.842285		429	0.705742	4203.04	Rep	tau_sk	S	0.0719452	0.0234244	27.3989	-1.07144	0.960558	0.34738
430	0.706972	4038.79	Rep (u*D)	u*/ws	S	3.46809	1.45901	0.158846	-1.64967	0.842285	0.581776		430	0.705742	4203.04	S	tau_sk	Rep	0.0719452	0.0234244	27.3989	0.34738	0.960558	-1.07144
431	0.706972	4038.79	u*/ws	Rep (u*D)	S	3.46809	1.45901	0.158846	0.842285	-1.64967	0.581776		431	0.705742	4203.04	tau_sk	S	Rep	0.0719452	0.0234244	27.3989	0.960558	0.34738	-1.07144
432	0.706972	4038.79	u*/ws	S	Rep (u*D)	3.46809	1.45901	0.158846	0.842285	0.581776	-1.64967		432	0.705742	4203.04	tau_sk	Rep	S	0.0719452	0.0234244	27.3989	0.960558	-1.07144	0.34738
433	0.704438	4255.11	Rep	h/D50	tau_sk	0.212062	0.304159	0.641297	-1.02778	-0.313224	1.05826		433	0.700316	4225.27	h/Kc	h/D50	u*_sk/ws	1.1361	0.230626	0.787064	0.21529	-0.90504	1.81267
434	0.704438	4255.11	h/D50	Rep	tau_sk	0.212062	0.304159	0.641297	-0.313224	-1.02778	1.05826		434	0.700316	4225.27	h/D50	h/Kc	u*_sk/ws	1.1361	0.230626	0.787064	-0.90504	0.21529	1.81267
435	0.704438	4255.11	h/D50	tau_sk	Rep	0.212062	0.304159	0.641297	-0.313224	1.05826	-1.02778		435	0.700316	4225.27	h/Kc	u*_sk/ws	h/D50	1.1361	0.230626	0.787064	0.21529	1.81267	-0.90504
436	0.704438	4255.11	tau_sk	h/D50	Rep	0.212062	0.304159	0.641297	1.05826	-0.313224	-1.02778		436	0.700316	4225.27	u*_sk/ws	h/Kc	h/D50	1.1361	0.230626	0.787064	1.81267	0.21529	-0.90504
437	0.704438	4255.11	Rep	tau_sk	h/D50	0.212062	0.304159	0.641297	-1.02778	1.05826	-0.313224		437	0.700316	4225.27	h/D50	u*_sk/ws	h/Kc	1.1361	0.230626	0.787064	-0.90504	1.81267	0.21529
438	0.704438	4255.11	tau_sk	Rep	h/D50	0.212062	0.304159	0.641297	1.05826	-1.02778	-0.313224		438	0.700316	4225.27	u*_sk/ws	h/D50	h/Kc	1.1361	0.230626	0.787064	1.81267	-0.90504	0.21529
439	0.704168	4141.26	Fr	did50	Rep (u*_sk D)	60.3602	0.000236016	17.1677	2.01919	-0.832532	-1.80011		439	0.695671	4229.67	did50	u*_sk/ws	tau	3.70738	0.13136	6.52573e-05	1.37275	2.40399	0.358548
440	0.704168	4141.26	did50	Fr	Rep (u*_sk D)	60.3602	0.000236016	17.1677	-0.832532	2.01919	-1.80011		440	0.695671	4229.67	did50	tau	u*_sk/ws	3.70738	0.13136	6.52573e-05	1.37275	0.358548	2.40399
441	0.704168	4141.26	did50	Rep (u*_sk D)	Fr	60.3602	0.000236016	17.1677	-0.832532	-1.80011	2.01919		441	0.695671	4229.67	u*_sk/ws	tau	did50	3.70738	0.13136	6.52573e-05	2.40399	0.358548	1.37275
442	0.704168	4141.26	Rep (u*_sk D)	did50	Fr	60.3602	0.000236016	17.1677	-1.80011	-0.832532	2.01919		442	0.695671	4229.67	tau	u*_sk/ws	did50	3.70738	0.13136	6.52573e-05	0.358548	2.40399	1.37275
443	0.704168	4141.26	Fr	Rep (u*_sk D)	did50	60.3602	0.000236016	17.1677	2.01919	-1.80011	-0.832532		443	0.695671	4229.67	u*_sk/ws	did50	tau	3.70738	0.13136	6.52573e-05	2.40399	1.37275	0.358548
444	0.704168	4141.26	Rep (u*_sk D)	Fr	did50	60.3602	0.000236016	17.1677	-1.80011	2.01919	-0.832532		444	0.695671	4229.67	tau	did50	u*_sk/ws	3.70738	0.13136	6.52573e-05	0.358548	1.37275	2.40399
445	0.698697	4201.93	u*_sk/ws	Rep (u*D)	tau_sk	0.031011	3.6547	0.0131841	0.804347	-0.919078	0.85195		445	0.704116	4250.22	h/D50	Rep	tau_sk	2.55773	0.0666626	0.210826	-0.300822	-1.02957	1.02869
446	0.698697	4201.93	u*_sk/ws	tau_sk	Rep (u*D)	0.031011	3.6547	0.0131841	0.804347	0.85195	-0.919078		446	0.704116	4250.22	tau_sk	Rep	h/D50	2.55773	0.0666626	0.210826	1.02869	-1.02957	-0.300822
447	0.698697	4201.93	Rep (u*D)	u*_sk/ws	tau_sk	0.031011	3.6547	0.0131841	-0.919078	0.804347	0.85195		447	0.704116	4250.22	Rep	h/D50	tau_sk	2.55773	0.0666626	0.210826	-1.02957	-0.300822	1.02869
448	0.698697	4201.93	Rep (u*D)	tau_sk	u*_sk/ws	0.031011	3.6547	0.0131841	-0.919078	0.85195	0.804347		448	0.704116	4250.22	h/D50	tau_sk	Rep	2.55773	0.0666626	0.210826	-0.300822	1.02869	-1.02957
449	0.698697	4201.93	tau_sk	Rep (u*D)	u*_sk/ws	0.031011	3.6547	0.0131841	0.85195	-0.919078	0.804347		449	0.704116	4250.22	tau_sk	h/D50	Rep	2.55773	0.0666626	0.210826	1.02869	-0.300822	-1.02957
450	0.698697	4201.93	tau_sk	u*_sk/ws	Rep (u*D)	0.031011	3.6547	0.0131841	0.85195	0.804347	-0.919078		450	0.704116	4250.22	Rep	tau_sk	h/D50	2.55773	0.0666626	0.210826	-1.02957	1.02869	-0.300822
451	0.697741	4159.26	did50	h/D50	u*/ws	0.675303	1.34675e+06	8.12314e-09	2.43087	-0.713397	3.16288		451	0.689218	4267.41	h/D50	u*_sk/ws	u*/ws	0.0823915	0.00164161	192.819	-0.660658	1.79453	0.301571
452	0.697741	4159.26	h/D50	did50	u*/ws	0.675303	1.34675e+06	8.12314e-09	-0.713397	2.43087	3.16288		452	0.689218	4267.41	u*_sk/ws	h/D50	u*/ws	0.0823915	0.00164161	192.819	1.79453	-0.660658	0.301571
453	0.697741	4159.26	did50	u*/ws	h/D50	0.675303	1.34675e+06	8.12314e-09	2.43087	3.16288	-0.713397		453	0.689218	4267.41	h/D50	u*/ws	u*_sk/ws	0.0823915	0.00164161	192.819	-0.660658	0.301571	1.79453
454	0.697741	4159.26	u*/ws	did50	h/D50	0.675303	1.34675e+06	8.12314e-09	3.16288	2.43087	-0.713397		454	0.689218	4267.41	u*/ws	h/D50	u*_sk/ws	0.0823915	0.00164161	192.819	0.301571	-0.660658	1.79453
455	0.697741	4159.26	h/D50	u*/ws	did50	0.675303	1.34675e+06	8.12314e-09	-0.713397	3.16288	2.43087		455	0.689218	4267.41	u*_sk/ws	u*/ws	h/D50	0.0823915	0.00164161	192.819	1.79453	0.301571	-0.660658
456	0.697741	4159.26	u*/ws	h/D50	did50	0.675303	1.34675e+06	8.12314e-09	3.16288	-0.713397	2.43087		456	0.689218	4267.41	u*/ws	u*_sk/ws	h/D50	0.0823915	0.00164161	192.819	0.301571	1.79453	-0.660658
457	0.695843	4232.18	did50	u*_sk/ws	tau	1.73433e-21	2.13494e+07	8.68214e+08	1.36159	2.40906	0.325501		457	0.695026	4298.54	did50	Rep (u*_sk D)	Rep	1.51037e-10	9.89701	11970.5	-2.98798	2.90227	-2.59579
458	0.695843	4232.18	u*_sk/ws	did50	tau	1.73433e-21	2.13494e+07	8.68214e+08	2.40906	1.36159	0.325501		458	0.695026	4298.54	Rep (u*_sk D)	did50	Rep	1.51037e-10	9.89701	11970.5	2.90227	-2.98798	-2.59579
459	0.695843	4232.18	did50	tau	u*_sk/ws	1.73433e-21	2.13494e+07	8.68214e+08	1.36159	0.325501	2.40906		459	0.695026	4298.54	did50	Rep	Rep (u*_sk D)	1.51037e-10	9.89701	11970.5	-2.98798	-2.59579	2.90227
460	0.695843	4232.18	tau	did50	u*_sk/ws	1.73433e-21	2.13494e+07	8.68214e+08	0.325501	1.36159	2.40906		460	0.695026	4298.54	Rep	did50	Rep (u*_sk D)	1.51037e-10	9.89701	11970.5	-2.59579	-2.98798	2.90227
461	0.695843	4232.18	tau	u*_sk/ws	did50	1.73433e-21	2.13494e+07	8.68214e+08	0.325501	2.40906	1.36159		461	0.695026	4298.54	Rep (u*_sk D)	Rep	did50	1.51037e-10	9.89701	11970.5	2.90227	-2.59579	-2.98798
462	0.695843	4232.18	u*_sk/ws	tau	did50	1.73433e-21	2.13494e+07	8.68214e+08	2.40906	0.325501	1.36159		462	0.695026	4298.54	Rep	Rep (u*_sk D)	did50	1.51037e-10	9.89701	11970.5	-2.59579	2.90227	-2.98798
463	0.695116	4299.81	did50	Rep (u*_sk D)	Rep	5.03067e-14	1.2934e-10	2.94487e+18	-2.9571	2.85742	-2.58723		463	0.692825	4303.58	Rep (u*_sk D)	Rep	u*_sk/ws	0.0699025	0.000827092	0.241314	1.12582	-0.689879	1.95184
464	0.695116	4299.81	Rep (u*_sk D)	did50	Rep	5.03067e-14	1.2934e-10	2.94487e+18	2.85742	-2.9571	-2.58723		464	0.692825	4303.58	Rep	Rep (u*_sk D)	u*_sk/ws	0.0699025	0.000827092	0.241314	-0.689879	1.12582	1.95184
465	0.695116	4299.81	did50	Rep	Rep (u*_sk D)	5.03067e-14	1.2934e-10	2.94487e+18	-2.9571	-2.58723	2.85742		465	0.692825	4303.58	Rep (u*_sk D)	u*_sk/ws	Rep	0.0699025	0.000827092	0.241314	1.12582	1.95184	-0.689879
466	0.695116	4299.81	Rep	did50	Rep (u*_sk D)	5.03067e-14	1.2934e-10	2.94487e+18	-2.58723	-2.9571	2.85742		466	0.692825	4303.58	u*_sk/ws	Rep (u*_sk D)	Rep	0.0699025	0.000827092	0.241314	1.95184	1.12582	-0.689879
467	0.695116	4299.81	Rep (u*_sk D)	Rep	did50	5.03067e-14	1.2934e-10	2.94487e+18	2.85742	-2.58723	-2.9571		467	0.692825	4303.58	Rep	u*_sk/ws	Rep (u*_sk D)	0.0699025	0.000827092	0.241314	-0.689879	1.95184	1.12582
468	0.695116	4299.81	Rep	Rep (u*_sk D)	did50	5.03067e-14	1.2934e-10	2.94487e+18	-2.58723	2.85742	-2.9571		468	0.692825	4303.58	u*_sk/ws	Rep	Rep (u*_sk D)	0.0699025	0.000827092	0.241314	1.95184	-0.689879	1.12582
469	0.693213	4352.97	tau	Rep (u*D)	Fr	19.5956	6.81874e-10	7.0857e+06	0.625695	-1.78077	1.1386		469	0.691227	4321.57	Rep	did50	tau_sk	7.59568e-05	3.7095e-11	4.54761e+11	-1.03675	-0.742373	1.04488
470	0.693213	4352.97	Fr	Rep (u*D)	tau	19.5956	6.81874e-10	7.0857e+06	1.1386	-1.78077	0.625695		470	0.691227	4321.57	did50	tau_sk	Rep	7.59568e-05	3.7095e-11	4.54761e+11	-0.742373	1.04488	-1.03675
471	0.693213	4352.97	Rep (u*D)	Fr	tau	19.5956	6.81874e-10	7.0857e+06	-1.78077	1.1386	0.625695		471	0.691227	4321.57	tau_sk	did50	Rep	7.59568e-05	3.7095e-11	4.54761e+11	1.04488	-0.742373	-1.03675
472	0.693213	4352.97	Fr	tau	Rep (u*D)	19.5956	6.81874e-10	7.0857e+06	1.1386	0.625695	-1.78077		472	0.691227	4321.57	Rep	tau_sk	did50	7.59568e-05	3.7095e-11	4.54761e+11	-1.03675	1.04488	-0.742373
473	0.693213	4352.97	tau	Fr	Rep (u*D)	19.5956	6.81874e-10	7.0857e+06	0.625695	1.1386	-1.78077		473	0.691227	4321.57	did50	Rep	tau_sk	7.59568e-05	3.7095e-11	4.54761e+11	-0.742373	-1.03675	1.04488
474	0.693213	4352.97	Rep (u*D)	tau	Fr	19.5956	6.81874e-10	7.0857e+06	-1.78077	0.625695	1.1386		474	0.691227	4321.57	tau_sk	Rep	did50	7.59568e-05	3.7095e-11	4.54761e+11	1.04488	-1.03675	-0.742373
475	0.692964	4305.56	Rep (u*_sk D)	Rep	u*_sk/ws	0.278143	0.00967157	0.00573071	1.08852	-0.702805	1.9246		475	0.693117	4351.56	Fr	Rep (u*D)	tau	0.00868492	3.22859e+06	3.18721e-06	1.11424	-1.78055	0.629159
476	0.692964	4305.56	Rep	Rep (u*_sk D)	u*_sk/ws	0.278143	0.00967157	0.00573071	-0.702805	1.08852	1.9246		476	0.693117	4351.56	Fr	tau	Rep (u*D)	0.00868492	3.22859e+06	3.18721e-06	1.11424	0.629159	-1.78055
477	0.692964	4305.56	Rep (u*_sk D)	u*_sk/ws	Rep	0.278143	0.00967157	0.00573071	1.08852	1.9246	-0.702805		477	0.693117	4351.56	tau	Fr	Rep (u*D)	0.00868492	3.22859e+06	3.18721e-06	0.629159	1.11424	-1.78055
478	0.692964	4305.56	u*_sk/ws	Rep (u*_sk D)	Rep	0.278143	0.00967157	0.00573071	1.9246	1.08852	-0.702805		478	0.693117	4351.56	Rep (u*D)	tau	Fr	0.00868492	3.22859e+06	3.18721e-06	-1.78055	0.629159	1.11424
479	0.692964	4305.56	Rep	u*_sk/ws	Rep (u*_sk D)	0.278143	0.00967157	0.00573071	-0.702805	1.9246	1.08852		479	0.693117	4351.56	Rep (u*D)	Fr	tau	0.00868492	3.22859e+06	3.18721e-06	-1.78055	1.11424	0.629159
480	0.692964	4305.56	u*_sk/ws	Rep	Rep (u*_sk D)	0.278143	0.00967157	0.00573071	1.9246	-0.702805	1.08852		480	0.693117	4351.56	tau	Rep (u*D)	Fr	0.00868492	3.22859e+06	3.18721e-06	0.629159	-1.78055	1.11424
481	0.691343	4323.28	did50	Rep	tau_sk	1.10801e+10	1.19183e-15	99.2218	-0.706041	-1.03197	1.06276		481	0.689432	4358.7	Cf	u*_sk/ws	did50	0.0028002	4.14655	0.0206255	0.361998	2.74669	1.59469
482	0.691343	4323.28	Rep	did50	tau_sk	1.10801e+10	1.19183e-15	99.2218	-1.03197	-0.706041	1.06276		482	0.689432	4358.7	Cf	did50	u*_sk/ws	0.0028002	4.14655	0.0206255	0.361998	1.59469	2.74669
483	0.691343	4323.28	did50	tau_sk	Rep	1.10801e+10	1.19183e-15	99.2218	-0.706041	1.06276	-1.03197		483	0.689432	4358.7	did50	u*_sk/ws	Cf	0.0028002	4.14655	0.0206255	1.59469	2.74669	0.361998
484	0.691343	4323.28	tau_sk	did50	Rep	1.10801e+10	1.19183e-15	99.2218	1.06276	-0.706041	-1.03197		484	0.689432	4358.7	u*_sk/ws	did50	Cf	0.0028002	4.14655	0.0206255	2.74669	1.59469	0.361998
485	0.691343	4323.28	Rep	tau_sk	did50	1.10801e+10	1.19183e-15	99.2218	-1.03197	1.06276	-0.706041		485	0.689432	4358.7	u*_sk/ws	Cf	did50	0.0028002	4.14655	0.0206255	2.74669	0.361998	1.59469
486	0.691343	4323.28	tau_sk	Rep	did50	1.10801e+10	1.19183e-15	99.2218	1.06276	-1.03197	-0.706041		486	0.689432	4358.7	did50	Cf	u*_sk/ws	0.0028002	4.14655	0.0206255	1.59469	0.361998	2.74669
487	0.689507	4359.75	u*_sk/ws	did50	Cf	0.000502404	4.5535	0.0927975	2.74323	1.58907	0.341256		487	0.696673	4364.16	h/D50	Rep (u*D)	tau_sk	6.26743	0.758841	0.0302812	-0.223162	-1.53488	1.0448
488	0.689507	4359.75	u*_sk/ws	Cf	did50	0.000502404	4.5535	0.0927975	2.74323	0.341256	1.58907		488	0.696673	4364.16	Rep (u*D)	h/D50	tau_sk	6.26743	0.758841	0.0302812	-1.53488	-0.223162	1.0448
489	0.689507	4359.75	did50	Cf	u*_sk/ws	0.000502404	4.5535	0.0927975	1.58907	0.341256	2.74323		489	0.696673	4364.16	h/D50	tau_sk	Rep (u*D)	6.26743	0.758841	0.0302812	-0.223162	1.0448	-1.53488
490	0.689507	4359.75	Cf	did50	u*_sk/ws	0.000502404	4.5535	0.0927975	0.341256	1.58907	2.74323		490	0.696673	4364.16	Rep (u*D)	tau_sk	h/D50	6.26743	0.758841	0.0302812	-1.53488	1.0448	-0.223162
491	0.689507	4359.75	did50	u*_sk/ws	Cf	0.000502404	4.5535	0.0927975	1.58907	2.74323	0.341256		491	0.696673	4364.16	tau_sk	h/D50	Rep (u*D)	6.26743	0.758841	0.0302812	1.0448	-0.223162	-1.53488
492	0.689507	4359.75	Cf	u*_sk/ws	did50	0.000502404	4.5535	0.0927975	0.341256	2.74323	1.58907		492	0.696673	4364.16	tau_sk	Rep (u*D)	h/D50	6.26743	0.758841	0.0302812	1.0448	-1.53488	-0.223162
493	0.688253	4361.3	did50	Rep (u*_sk D)	u*_sk/ws	40.4531	2.78348e-07	1.37755	0.932612	0.411743	2.52788		493	0.686957	4390.07	u*_sk/ws	u*/ws	tau_sk	5.25264	0.00219665	0.0357133	3.69435	-2.37332	0.838848
494	0.688253	4361.3	Rep (u*_sk D)	did50	u*_sk/ws	40.4531	2.78348e-07	1.37755	0.411743	0.932612	2.52788		494	0.686957	4390.07	u*/ws	u*_sk/ws	tau_sk	5.25264	0.00219665	0.0357133	-2.37332	3.69435	0.838848
495	0.688253	4361.3	did50	u*_sk/ws	Rep (u*_sk D)	40.4531	2.78348e-07	1.37755	0.932612	2.52788	0.411743		495	0.686957	4390.07	u*_sk/ws	tau_sk	u*/ws	5.25264	0.00219665	0.0357133	3.69435	0.838848	-2.37332
496	0.688253	4361.3	u*_sk/ws	did50	Rep (u*_sk D)	40.4531	2.78348e-07	1.37755	2.52788	0.932612	0.411743		496	0.686957	4390.07	tau_sk	u*_sk/ws	u*/ws	5.25264	0.00219665	0.0357133	0.838848	3.69435	-2.37332
497	0.688253	4361.3	Rep (u*_sk D)	u*_sk/ws	did50	40.4531	2.78348e-07	1.37755	0.411743	2.52788	0.932612		497	0.686957	4390.07	u*/ws	tau_sk	u*_sk/ws	5.25264	0.00219665	0.0357133	-2.37332	0.838848	3.69435
498	0.688253	4361.3	u*_sk/ws	Rep (u*_sk D)	did50	40.4531	2.78348e-07	1.37755	2.52788	0.411743	0.932612		498	0.686957	4390.07	tau_sk	u*/ws	u*_sk/ws	5.25264	0.00219665	0.0357133	0.838848	-2.37332	3.69435
499	0.686034	4406.71	did50	h/Kc	u*_sk/ws	0.257724	358.755	6.26614e-07	1.98824	-0.176631	2.99353		499	0.688469	4433.22	Fr	h/D50	Rep (u*_sk D)	1.58595	0.0953312	0.205628	2.53675	0.373661	-2.07355
500	0.686034	4406.71	h/Kc	did50	u*_sk/ws	0.257724	358.755	6.26614e-07	-0.176631	1.98824	2.99353		500	0.688469	4433.22	h/D50	Fr	Rep (u*_sk D)	1.58595	0.0953312	0.205628	0.373661	2.53675	-2.07355
501	0.686034	4406.71	did50	u*_sk/ws	h/Kc	0.257724	358.755	6.26614e-07	1.98824	2.99353	-0.176631		501	0.688469	4433.22	Fr	Rep (u*_sk D)	h/D50	1.58595	0.0953312	0.205628	2.53675	-2.07355	0.373661
502	0.686034	4406.71	u*_sk/ws	did50	h/Kc	0.257724	358.755	6.26614e-07	2.99353	1.98824	-0.176631		502	0.688469	4433.22	Rep (u*_sk D)	Fr	h/D50	1.58595	0.0953312	0.205628	-2.07355	2.53675	0.373661
503	0.686034	4406.71	h/Kc	u*_sk/ws	did50	0.257724	358.755	6.26614e-07	-0.176631	2.99353	1.98824		503	0.688469	4433.22	h/D50	Rep (u*_sk D)	Fr	1.58595	0.0953312	0.205628	0.373661	-2.07355	2.53675
504	0.686034	4406.71	u*_sk/ws	h/Kc	did50	0.257724	358.755	6.26614e-07	2.99353	-0.176631	1.98824		504	0.688469	4433.22	Rep (u*_sk D)	h/D50	Fr	1.58595	0.0953312	0.205628	-2.07355	0.373661	2.53675
505	0.685402	4470.48	Fr	Rep (u*_sk D)	h/D50	1.31387	0.20041	0.166561	2.34783	-2.15864	0.31857		505	0.683659	4451.08	Fr	Rep (u*_sk D)	tau	0.178738	5.34401	0.294098	1.8427	-2.08365	0.399199
506	0.685402	4470.48	Rep (u*_sk D)	Fr	h/D50	1.31387	0.20041	0.166561	-2.15864	2.34783	0.31857		506	0.683659	4451.08	Rep (u*_sk D)	Fr	tau	0.178738	5.34401	0.294098	-2.08365	1.8427	0.399199
507	0.685402	4470.48	Fr	h/D50	Rep (u*_sk D)	1.31387	0.20041	0.166561	2.34783	0.31857	-2.15864		507	0.683659	4451.08	Fr	tau	Rep (u*_sk D)	0.178738	5.34401	0.294098	1.8427	0.399199	-2.08365
508	0.685402	4470.48	h/D50	Fr	Rep (u*_sk D)	1.31387	0.20041	0.166561	0.31857	2.34783	-2.15864		508	0.683659	4451.08	tau	Fr	Rep (u*_sk D)	0.178738	5.34401	0.294098	0.399199	1.8427	-2.08365
509	0.685402	4470.48	h/D50	Rep (u*_sk D)	Fr	1.31387	0.20041	0.166561	0.31857	-2.15864	2.34783		509	0.683659	4451.08	Rep (u*_sk D)	tau	Fr	0.178738	5.34401	0.294098	-2.08365	0.399199	1.8427
510	0.685402	4470.48	Rep (u*_sk D)	h/D50	Fr	1.31387	0.20041	0.166561	-2.15864	0.31857	2.34783		510	0.683659	4451.08	tau	Rep (u*_sk D)	Fr	0.178738	5.34401	0.294098	0.399199	-2.08365	1.8427
511	0.684185	4448	Fr	Rep (u*_sk D)	tau	0.00174252	212364	0.000820429	1.86885	-2.07583	0.353096		511	0.682355	4455.13	did50	h/Kc	u*_sk/ws	0.209293	1015.77	3.01702e-07	2.15073	-0.209417	3.09069
512	0.684185	4448	Rep (u*_sk D)	Fr	tau	0.00174252	212364	0.000820429	-2.07583	1.86885	0.353096		512	0.682355	4455.13	h/Kc	did50	u*_sk/ws	0.209293	1015.77	3.01702e-07	-0.209417	2.15073	3.09069
513	0.684185	4448	Fr	tau	Rep (u*_sk D)	0.00174252	212364	0.000820429	1.86885	0.353096	-2.07583		513	0.682355	4455.13	did50	u*_sk/ws	h/Kc	0.209293	1015.77	3.01702e-07	2.15073	3.09069	-0.209417
514	0.684185	4448	tau	Fr	Rep (u*_sk D)	0.00174252	212364	0.000820429	0.353096	1.86885	-2.07583		514	0.682355	4455.13	u*_sk/ws	did50	h/Kc	0.209293	1015.77	3.01702e-07	3.09069	2.15073	-0.209417
515	0.684185	4448	Rep (u*_sk D)	tau	Fr	0.00174252	212364	0.000820429	-2.07583	0.353096	1.86885		515	0.682355	4455.13	h/Kc	u*_sk/ws	did50	0.209293	1015.77	3.01702e-07	-0.209417	3.09069	2.15073
516	0.684185	4448	tau	Rep (u*_sk D)	Fr	0.00174252	212364	0.000820429	0.353096	-2.07583	1.86885		516	0.682355	4455.13	u*_sk/ws	h/Kc	did50	0.209293	1015.77	3.01702e-07	3.09069	-0.209417	2.15073
517	0.682025	4473.26	did50	Rep	u*_sk/ws	0.0488344	0.00378575	0.183214	1.07103	0.0440018	2.44049		517	0.680291	4462.79	Rep	u*/ws	tau_sk	2075.14	7.72277e-05	0.00362141	-0.811932	0.509993	1.06539
518	0.682025	4473.26	Rep	did50	u*_sk/ws	0.0488344	0.00378575	0.183214	0.0440018	1.07103	2.44049		518	0.680291	4462.79	u*/ws	Rep	tau_sk	2075.14	7.72277e-05	0.00362141	0.509993	-0.811932	1.06539
519	0.682025	4473.26	did50	u*_sk/ws	Rep	0.0488344	0.00378575	0.183214	1.07103	2.44049	0.0440018		519	0.680291	4462.79	Rep	tau_sk	u*/ws	2075.14	7.72277e-05	0.00362141	-0.811932	1.06539	0.509993
520	0.682025	4473.26	u*_sk/ws	did50	Rep	0.0488344	0.00378575	0.183214	2.44049	1.07103	0.0440018		520	0.680291	4462.79	tau_sk	u*/ws	Rep	2075.14	7.72277e-05	0.00362141	1.06539	0.509993	-0.811932
521	0.682025	4473.26	u*_sk/ws	Rep	did50	0.0488344	0.00378575	0.183214	2.44049	0.0440018	1.07103		521	0.680291	4462.79	tau_sk	Rep	u*/ws	2075.14	7.72277e-05	0.00362141	1.06539	-0.811932	0.509993
522	0.682025	4473.26	Rep	u*_sk/ws	did50	0.0488344	0.00378575	0.183214	0.0440018	2.44049	1.07103		522	0.680291	4462.79	u*/ws	tau_sk	Rep	2075.14	7.72277e-05	0.00362141	0.509993	1.06539	-0.811932
523	0.681675	4489.7	did50	Rep (u*D)	u*_sk/ws	0.000388513	0.272393	0.469391	1.04026	-0.105168	2.33675		523	0.681567	4488.12	did50	Rep (u*D)	u*_sk/ws	0.184698	77406.7	3.11878e-09	1.03803	-0.0640258	2.35452
524	0.681675	4489.7	Rep (u*D)	did50	u*_sk/ws	0.000388513	0.272393	0.469391	-0.105168	1.04026	2.33675		524	0.681567	4488.12	did50	u*_sk/ws	Rep (u*D)	0.184698	77406.7	3.11878e-09	1.03803	2.35452	-0.0640258
525	0.681675	4489.7	did50	u*_sk/ws	Rep (u*D)	0.000388513	0.272393	0.469391	1.04026	2.33675	-0.105168		525	0.681567	4488.12	Rep (u*D)	did50	u*_sk/ws	0.184698	77406.7	3.11878e-09	-0.0640258	1.03803	2.35452
526	0.681675	4489.7	u*_sk/ws	did50	Rep (u*D)	0.000388513	0.272393	0.469391	2.33675	1.04026	-0.105168		526	0.681567	4488.12	u*_sk/ws	did50	Rep (u*D)	0.184698	77406.7	3.11878e-09	2.35452	1.03803	-0.0640258
527	0.681675	4489.7	Rep (u*D)	u*_sk/ws	did50	0.000388513	0.272393	0.469391	-0.105168	2.33675	1.04026		527	0.681567	4488.12	Rep (u*D)	u*_sk/ws	did50	0.184698	77406.7	3.11878e-09	-0.0640258	2.35452	1.03803
528	0.681675	4489.7	u*_sk/ws	Rep (u*D)	did50	0.000388513	0.272393	0.469391	2.33675	-0.105168	1.04026		528	0.681567	4488.12	u*_sk/ws	Rep (u*D)	did50	0.184698	77406.7	3.11878e-09	2.35452	-0.0640258	1.03803
529	0.681182	4491.16	did50	did50	u*_sk/ws	3.40436	0.00990386	0.00108773	2.4126	-1.32284	2.42151		529	0.681153	4490.74	did50	did50	u*_sk/ws	73.6898	0.00942295	5.33859e-05	3.29938	-2.23019	2.40706
530	0.681182	4491.16	did50	u*_sk/ws	did50	3.40436	0.00990386	0.00108773	2.4126	2.42151	-1.32284		530	0.681153	4490.74	did50	u*_sk/ws	did50	73.6898	0.00942295	5.33859e-05	3.29938	2.40706	-2.23019
531	0.681182	4491.16	u*_sk/ws	did50	did50	3.40436	0.00990386	0.00108773	2.42151	2.4126	-1.32284		531	0.681153	4490.74	u*_sk/ws	did50	did50	73.6898	0.00942295	5.33859e-05	2.40706	3.29938	-2.23019
532	0.681182	4491.16	did50	u*_sk/ws	u*_sk/ws	6.98644e-05	0.00258014	203.452	1.08979	1.67536	0.746163		532	0.681153	4490.74	did50	u*_sk/ws	u*_sk/ws	0.000761082	0.222424	0.218976	1.0692	1.09722	1.30988
533	0.681182	4491.16	u*_sk/ws	did50	u*_sk/ws	6.98644e-05	0.00258014	203.452	1.67536	1.08979	0.746163		533	0.681153	4490.74	u*_sk/ws	did50	u*_sk/ws	0.000761082	0.222424	0.218976	1.09722	1.0692	1.30988
534	0.681182	4491.16	u*_sk/ws	u*_sk/ws	did50	6.98644e-05	0.00258014	203.452	1.67536	0.746163	1.08979		534	0.681153	4490.74	u*_sk/ws	u*_sk/ws	did50	0.000761082	0.222424	0.218976	1.09722	1.30988	1.0692
535	0.68055	4567.79	Fr	Rep	tau_sk	0.600751	0.663526	0.00968059	0.517261	-0.871751	1.05838		535	0.67275	4527.71	h/Kc	u*_sk/ws	tau_sk	29.6165	0.00129945	0.00157484	0.0999104	1.43771	0.622751
536	0.68055	4567.79	Rep	Fr	tau_sk	0.600751	0.663526	0.00968059	-0.871751	0.517261	1.05838		536	0.67275	4527.71	u*_sk/ws	h/Kc	tau_sk	29.6165	0.00129945	0.00157484	1.43771	0.0999104	0.622751
537	0.68055	4567.79	Fr	tau_sk	Rep	0.600751	0.663526	0.00968059	0.517261	1.05838	-0.871751		537	0.67275	4527.71	h/Kc	tau_sk	u*_sk/ws	29.6165	0.00129945	0.00157484	0.0999104	0.622751	1.43771
538	0.68055	4567.79	tau_sk	Fr	Rep	0.600751	0.663526	0.00968059	1.05838	0.517261	-0.871751		538	0.67275	4527.71	tau_sk	h/Kc	u*_sk/ws	29.6165	0.00129945	0.00157484	0.622751	0.0999104	1.43771
539	0.68055	4567.79	Rep	tau_sk	Fr	0.600751	0.663526	0.00968059	-0.871751	1.05838	0.517261		539	0.67275	4527.71	u*_sk/ws	tau_sk	h/Kc	29.6165	0.00129945	0.00157484	1.43771	0.622751	0.0999104
540	0.68055	4567.79	tau_sk	Rep	Fr	0.600751	0.663526	0.00968059	1.05838	-0.871751	0.517261		540	0.67275	4527.71	tau_sk	u*_sk/ws	h/Kc	29.6165	0.00129945	0.00157484	0.622751	1.43771	0.0999104
541	0.680482	4465.62	Rep	u*/ws	tau_sk	0.0107899	2.52516e-05	2326.73	-0.820621	0.469447	1.08699		541	0.677294	4547.33	u*_sk/ws	did50	Rep	0.295863	0.00884111	0.0176587	2.21097	0.838747	-0.0820764
542	0.680482	4465.62	u*/ws	Rep	tau_sk	0.0107899	2.52516e-05	2326.73	0.469447	-0.820621	1.08699		542	0.677294	4547.33	did50	Rep	u*_sk/ws	0.295863	0.00884111	0.0176587	0.838747	-0.0820764	2.21097
543	0.680482	4465.62	Rep	tau_sk	u*/ws	0.0107899	2.52516e-05	2326.73	-0.820621	1.08699	0.469447		543	0.677294	4547.33	Rep	did50	u*_sk/ws	0.295863	0.00884111	0.0176587	-0.0820764	0.838747	2.21097
544	0.680482	4465.62	tau_sk	Rep	u*/ws	0.0107899	2.52516e-05	2326.73	1.08699	-0.820621	0.469447		544	0.677294	4547.33	did50	u*_sk/ws	Rep	0.295863	0.00884111	0.0176587	0.838747	2.21097	-0.0820764
545	0.680482	4465.62	u*/ws	tau_sk	Rep	0.0107899	2.52516e-05	2326.73	0.469447	1.08699	-0.820621		545	0.677294	4547.33	Rep	u*_sk/ws	did50	0.295863	0.00884111	0.0176587	-0.0820764	2.21097	0.838747
546	0.680482	4465.62	tau_sk	u*/ws	Rep	0.0107899	2.52516e-05	2326.73	1.08699	0.469447	-0.820621		546	0.677294	4547.33	u*_sk/ws	Rep	did50	0.295863	0.00884111	0.0176587	2.21097	-0.0820764	0.838747
547	0.679484	4569.22	Rep	Rep (u*D)	tau_sk	13.8084	0.0702814	0.00687204	-0.398712	-0.92382	1.22624		547	0.680356	4564.9	Fr	Rep	tau_sk	0.636122	21.163	0.000274314	0.495297	-0.879241	1.0376
548	0.679484	4569.22	Rep	tau_sk	Rep (u*D)	13.8084	0.0702814	0.00687204	-0.398712	1.22624	-0.92382		548	0.680356	4564.9	Rep	Fr	tau_sk	0.636122	21.163	0.000274314	-0.879241	0.495297	1.0376
549	0.679484	4569.22	Rep (u*D)	Rep	tau_sk	13.8084	0.0702814	0.00687204	-0.92382	-0.398712	1.22624		549	0.680356	4564.9	Fr	tau_sk	Rep	0.636122	21.163	0.000274314	0.495297	1.0376	-0.879241
550	0.679484	4569.22	Rep (u*D)	tau_sk	Rep	13.8084	0.0702814	0.00687204	-0.92382	1.22624	-0.398712		550	0.680356	4564.9	tau_sk	Fr	Rep	0.636122	21.163	0.000274314	1.0376	0.495297	-0.879241
551	0.679484	4569.22	tau_sk	Rep (u*D)	Rep	13.8084	0.0702814	0.00687204	1.22624	-0.92382	-0.398712		551	0.680356	4564.9	Rep	tau_sk	Fr	0.636122	21.163	0.000274314	-0.879241	1.0376	0.495297
552	0.679484	4569.22	tau_sk	Rep	Rep (u*D)	13.8084	0.0702814	0.00687204	1.22624	-0.398712	-0.92382		552	0.680356	4564.9	tau_sk	Rep	Fr	0.636122	21.163	0.000274314	1.0376	-0.879241	0.495297
553	0.677325	4722.97	h/D50	Rep (u*D)	tau_sk	2.11531	0.422033	0.110133	-0.235829	-1.22366	1.39295		553	0.679324	4566.81	tau_sk	Rep	Rep (u*D)	328.554	8.23083e-05	0.233579	1.20169	-0.41506	-0.899384
554	0.677325	4722.97	Rep (u*D)	h/D50	tau_sk	2.11531	0.422033	0.110133	-1.22366	-0.235829	1.39295		554	0.679324	4566.81	Rep (u*D)	Rep	tau_sk	328.554	8.23083e-05	0.233579	-0.899384	-0.41506	1.20169
555	0.677325	4722.97	h/D50	tau_sk	Rep (u*D)	2.11531	0.422033	0.110133	-0.235829	1.39295	-1.22366		555	0.679324	4566.81	Rep	Rep (u*D)	tau_sk	328.554	8.23083e-05	0.233579	-0.41506	-0.899384	1.20169
556	0.677325	4722.97	Rep (u*D)	tau_sk	h/D50	2.11531	0.422033	0.110133	-1.22366	1.39295	-0.235829		556	0.679324	4566.81	Rep (u*D)	tau_sk	Rep	328.554	8.23083e-05	0.233579	-0.899384	1.20169	-0.41506
557	0.677325	4722.97	tau_sk	Rep (u*D)	h/D50	2.11531	0.422033	0.110133	1.39295	-1.22366	-0.235829		557	0.679324	4566.81	tau_sk	Rep (u*D)	Rep	328.554	8.23083e-05	0.233579	1.20169	-0.899384	-0.41506
558	0.677325	4722.97	tau_sk	h/D50	Rep (u*D)	2.11531	0.422033	0.110133	1.39295	-0.235829	-1.22366		558	0.679324	4566.81	Rep	tau_sk	Rep (u*D)	328.554	8.23083e-05	0.233579	-0.41506	1.20169	-0.899384
559	0.676389	4574.2	Rep (u*D)	u*/ws	tau_sk	0.0244938	0.86507	0.300439	-1.32887	0.272859	1.13378		559	0.675939	4567.34	Rep (u*D)	u*/ws	tau_sk	0.0152978	0.85056	0.405515	-1.30038	0.334254	1.09515
560	0.676389	4574.2	u*/ws	Rep (u*D)	tau_sk	0.0244938	0.86507	0.300439	0.272859	-1.32887	1.13378		560	0.675939	4567.34	u*/ws	Rep (u*D)	tau_sk	0.0152978	0.85056	0.405515	0.334254	-1.30038	1.09515
561	0.676389	4574.2	Rep (u*D)	tau_sk	u*/ws	0.0244938	0.86507	0.300439	-1.32887	1.13378	0.272859		561	0.675939	4567.34	Rep (u*D)	tau_sk	u*/ws	0.0152978	0.85056	0.405515	-1.30038	1.09515	0.334254
562	0.676389	4574.2	tau_sk	Rep (u*D)	u*/ws	0.0244938	0.86507	0.300439	1.13378	-1.32887	0.272859		562	0.675939	4567.34	tau_sk	Rep (u*D)	u*/ws	0.0152978	0.85056	0.405515	1.09515	-1.30038	0.334254
563	0.676389	4574.2	u*/ws	tau_sk	Rep (u*D)	0.0244938	0.86507	0.300439	0.272859	1.13378	-1.32887		563	0.675939	4567.34	u*/ws	tau_sk	Rep (u*D)	0.0152978	0.85056	0.405515	0.334254	1.09515	-1.30038
564	0.676389	4574.2	tau_sk	u*/ws	Rep (u*D)	0.0244938	0.86507	0.300439	1.13378	0.272859	-1.32887		564	0.675939	4567.34	tau_sk	u*/ws	Rep (u*D)	0.0152978	0.85056	0.405515	1.09515	0.334254	-1.30038
565	0.67603	4575.29	Rep	Cf	tau_sk	6.1197	8.9949	0.000452816	-1.16821	0.431432	1.29401		565	0.675835	4572.5	Rep	Cf	tau_sk	3.89114	2.79675	0.00272769	-1.19178	0.459885	1.26935
566	0.67603	4575.29	Cf	Rep	tau_sk	6.1197	8.9949	0.000452816	0.431432	-1.16821	1.29401		566	0.675835	4572.5	Cf	Rep	tau_sk	3.89114	2.79675	0.00272769	0.459885	-1.19178	1.26935
567	0.67603	4575.29	Rep	tau_sk	Cf	6.1197	8.9949	0.000452816	-1.16821	1.29401	0.431432		567	0.675835	4572.5	Rep	tau_sk	Cf	3.89114	2.79675	0.00272769	-1.19178	1.26935	0.459885
568	0.67603	4575.29	tau_sk	Rep	Cf	6.1197	8.9949	0.000452816	1.29401	-1.16821	0.431432		568	0.675835	4572.5	tau_sk	Rep	Cf	3.89114	2.79675	0.00272769	1.26935	-1.19178	0.459885
569	0.67603	4575.29	Cf	tau_sk	Rep	6.1197	8.9949	0.000452816	0.431432	1.29401	-1.16821		569	0.675835	4572.5	Cf	tau_sk	Rep	3.89114	2.79675	0.00272769	0.459885	1.26935	-1.19178
570	0.67603	4575.29	tau_sk	Cf	Rep	6.1197	8.9949	0.000452816	1.29401	0.431432	-1.16821		570	0.675835	4572.5	tau_sk	Cf	Rep	3.89114	2.79675	0.00272769	1.26935	0.459885	-1.19178
571	0.67603	4575.29	h/Kc	Rep	tau_sk	18.8891	3.58664e-07	592.553	-0.143811	-1.16822	1.29401		571	0.675836	4572.5	h/Kc	Rep	tau_sk	1.02739e+08	6.39481e-06	6.45091e-06	-0.15329	-1.19179	1.26937
572	0.67603	4575.29	h/Kc	tau_sk	Rep	18.8891	3.58664e-07	592.553	-0.143811	1.29401	-1.16822		572	0.675836	4572.5	Rep	h/Kc	tau_sk	1.02739e+08	6.39481e-06	6.45091e-06	-1.19179	-0.15329	1.26937
573	0.67603	4575.29	Rep	h/Kc	tau_sk	18.8891	3.58664e-07	592.553	-1.16822	-0.143811	1.29401		573	0.675836	4572.5	h/Kc	tau_sk	Rep	1.02739e+08	6.39481e-06	6.45091e-06	-0.15329	1.26937	-1.19179
574	0.67603	4575.29	tau_sk	h/Kc	Rep	18.8891	3.58664e-07	592.553	1.29401	-0.143811	-1.16822		574	0.675836	4572.5	tau_sk	h/Kc	Rep	1.02739e+08	6.39481e-06	6.45091e-06	1.26937	-0.15329	-1.19179
575	0.67603	4575.29	Rep	tau_sk	h/Kc	18.8891	3.58664e-07	592.553	-1.16822	1.29401	-0.143811		575	0.675836	4572.5	Rep	tau_sk	h/Kc	1.02739e+08	6.39481e-06	6.45091e-06	-1.19179	1.26937	-0.15329
576	0.67603	4575.29	tau_sk	Rep	h/Kc	18.8891	3.58664e-07	592.553	1.29401	-1.16822	-0.143811		576	0.675836	4572.5	tau_sk	Rep	h/Kc	1.02739e+08	6.39481e-06	6.45091e-06	1.26937	-1.19179	-0.15329
577	0.67431	4672.25	Rep (u*_sk D)	Rep (u*D)	tau_sk	6.91111e-09	2.89432	686325	0.518628	-1.86392	1.17573		577	0.667795	4587.83	u*_sk/ws	tau_sk	tau	0.00113283	1.45361	0.070913	1.50566	0.829267	-0.299317
578	0.67431	4672.25	Rep (u*D)	Rep (u*_sk D)	tau_sk	6.91111e-09	2.89432	686325	-1.86392	0.518628	1.17573		578	0.667795	4587.83	tau_sk	u*_sk/ws	tau	0.00113283	1.45361	0.070913	0.829267	1.50566	-0.299317
579	0.67431	4672.25	tau_sk	Rep (u*D)	Rep (u*_sk D)	6.91111e-09	2.89432	686325	1.17573	-1.86392	0.518628		579	0.667795	4587.83	u*_sk/ws	tau	tau_sk	0.00113283	1.45361	0.070913	1.50566	-0.299317	0.829267
580	0.67431	4672.25	Rep (u*_sk D)	tau_sk	Rep (u*D)	6.91111e-09	2.89432	686325	0.518628	1.17573	-1.86392		580	0.667795	4587.83	tau	u*_sk/ws	tau_sk	0.00113283	1.45361	0.070913	-0.299317	1.50566	0.829267
581	0.67431	4672.25	tau_sk	Rep (u*_sk D)	Rep (u*D)	6.91111e-09	2.89432	686325	1.17573	0.518628	-1.86392		581	0.667795	4587.83	tau_sk	tau	u*_sk/ws	0.00113283	1.45361	0.070913	0.829267	-0.299317	1.50566
582	0.67431	4672.25	Rep (u*D)	tau_sk	Rep (u*_sk D)	6.91111e-09	2.89432	686325	-1.86392	1.17573	0.518628		582	0.667795	4587.83	tau	tau_sk	u*_sk/ws	0.00113283	1.45361	0.070913	-0.299317	0.829267	1.50566
583	0.672812	4528.6	h/Kc	u*_sk/ws	tau_sk	1.66785e-05	15.9044	0.227625	0.102359	1.42852	0.610606		583	0.671538	4617.92	Rep (u*_sk D)	did50	u*_sk/ws	3.04203	2.82776e-06	1.5688	0.414925	1.62546	2.91012
584	0.672812	4528.6	u*_sk/ws	h/Kc	tau_sk	1.66785e-05	15.9044	0.227625	1.42852	0.102359	0.610606		584	0.671538	4617.92	did50	u*_sk/ws	Rep (u*_sk D)	3.04203	2.82776e-06	1.5688	1.62546	2.91012	0.414925
585	0.672812	4528.6	h/Kc	tau_sk	u*_sk/ws	1.66785e-05	15.9044	0.227625	0.102359	0.610606	1.42852		585	0.671538	4617.92	u*_sk/ws	did50	Rep (u*_sk D)	3.04203	2.82776e-06	1.5688	2.91012	1.62546	0.414925
586	0.672812	4528.6	tau_sk	h/Kc	u*_sk/ws	1.66785e-05	15.9044	0.227625	0.610606	0.102359	1.42852		586	0.671538	4617.92	Rep (u*_sk D)	u*_sk/ws	did50	3.04203	2.82776e-06	1.5688	0.414925	2.91012	1.62546
587	0.672812	4528.6	u*_sk/ws	tau_sk	h/Kc	1.66785e-05	15.9044	0.227625	1.42852	0.610606	0.102359		587	0.671538	4617.92	u*_sk/ws	Rep (u*_sk D)	did50	3.04203	2.82776e-06	1.5688	2.91012	0.414925	1.62546
588	0.672812	4528.6	tau_sk	u*_sk/ws	h/Kc	1.66785e-05	15.9044	0.227625	0.610606	1.42852	0.102359		588	0.671538	4617.92	did50	Rep (u*_sk D)	u*_sk/ws	3.04203	2.82776e-06	1.5688	1.62546	0.414925	2.91012
589	0.671693	4685.17	Cf	Rep (u*D)	tau_sk	0.145118	0.0478331	5.1912	0.13554	-1.55023	1.24126		589	0.664863	4652.22	Cf	u*_sk/ws	tau_sk	8.72004e-05	0.314701	0.490503	-0.408623	1.15941	0.807551
590	0.671693	4685.17	Cf	tau_sk	Rep (u*D)	0.145118	0.0478331	5.1912	0.13554	1.24126	-1.55023		590	0.664863	4652.22	tau_sk	Cf	u*_sk/ws	8.72004e-05	0.314701	0.490503	0.807551	-0.408623	1.15941
591	0.671693	4685.17	tau_sk	Cf	Rep (u*D)	0.145118	0.0478331	5.1912	1.24126	0.13554	-1.55023		591	0.664863	4652.22	tau_sk	u*_sk/ws	Cf	8.72004e-05	0.314701	0.490503	0.807551	1.15941	-0.408623
592	0.671693	4685.17	Rep (u*D)	Cf	tau_sk	0.145118	0.0478331	5.1912	-1.55023	0.13554	1.24126		592	0.664863	4652.22	u*_sk/ws	Cf	tau_sk	8.72004e-05	0.314701	0.490503	1.15941	-0.408623	0.807551
593	0.671693	4685.17	Rep (u*D)	tau_sk	Cf	0.145118	0.0478331	5.1912	-1.55023	1.24126	0.13554		593	0.664863	4652.22	Cf	tau_sk	u*_sk/ws	8.72004e-05	0.314701	0.490503	-0.408623	0.807551	1.15941
594	0.671693	4685.17	tau_sk	Rep (u*D)	Cf	0.145118	0.0478331	5.1912	1.24126	-1.55023	0.13554		594	0.664863	4652.22	u*_sk/ws	tau_sk	Cf	8.72004e-05	0.314701	0.490503	1.15941	0.807551	-0.408623
595	0.671693	4685.17	Rep (u*D)	h/Kc	tau_sk	1.60938	0.579512	0.0217711	-1.55026	-0.0451811	1.24127		595	0.674061	4668.53	Rep (u*_sk D)	Rep (u*D)	tau_sk	4.34686e-06	6.19287e-07	4.96743e+09	0.468646	-1.82347	1.15161
596	0.671693	4685.17	h/Kc	Rep (u*D)	tau_sk	1.60938	0.579512	0.0217711	-0.0451811	-1.55026	1.24127		596	0.674061	4668.53	Rep (u*_sk D)	tau_sk	Rep (u*D)	4.34686e-06	6.19287e-07	4.96743e+09	0.468646	1.15161	-1.82347
597	0.671693	4685.17	h/Kc	tau_sk	Rep (u*D)	1.60938	0.579512	0.0217711	-0.0451811	1.24127	-1.55026		597	0.674061	4668.53	Rep (u*D)	Rep (u*_sk D)	tau_sk	4.34686e-06	6.19287e-07	4.96743e+09	-1.82347	0.468646	1.15161
598	0.671693	4685.17	tau_sk	h/Kc	Rep (u*D)	1.60938	0.579512	0.0217711	1.24127	-0.0451811	-1.55026		598	0.674061	4668.53	tau_sk	Rep (u*_sk D)	Rep (u*D)	4.34686e-06	6.19287e-07	4.96743e+09	1.15161	0.468646	-1.82347
599	0.671693	4685.17	Rep (u*D)	tau_sk	h/Kc	1.60938	0.579512	0.0217711	-1.55026	1.24127	-0.0451811		599	0.674061	4668.53	Rep (u*D)	tau_sk	Rep (u*_sk D)	4.34686e-06	6.19287e-07	4.96743e+09	-1.82347	1.15161	0.468646
600	0.671693	4685.17	tau_sk	Rep (u*D)	h/Kc	1.60938	0.579512	0.0217711	1.24127	-1.55026	-0.0451811		600	0.674061	4668.53	tau_sk	Rep (u*D)	Rep (u*_sk D)	4.34686e-06	6.19287e-07	4.96743e+09	1.15161	-1.82347	0.468646
601	0.670059	4713.11	Rep (u*D)	tau_sk	tau	0.051711	2.96136	0.0865799	-1.48413	1.17354	0.0863416		601	0.67145	4681.61	tau_sk	Rep (u*D)	Cf	0.0156658	0.0014217	1833.13	1.21206	-1.56927	0.154424
602	0.670059	4713.11	Rep (u*D)	tau	tau_sk	0.051711	2.96136	0.0865799	-1.48413	0.0863416	1.17354		602	0.67145	4681.61	tau_sk	Cf	Rep (u*D)	0.0156658	0.0014217	1833.13	1.21206	0.154424	-1.56927
603	0.670059	4713.11	tau	Rep (u*D)	tau_sk	0.051711	2.96136	0.0865799	0.0863416	-1.48413	1.17354		603	0.67145	4681.61	Rep (u*D)	Cf	tau_sk	0.0156658	0.0014217	1833.13	-1.56927	0.154424	1.21206
604	0.670059	4713.11	tau_sk	tau	Rep (u*D)	0.051711	2.96136	0.0865799	1.17354	0.0863416	-1.48413		604	0.67145	4681.61	Cf	Rep (u*D)	tau_sk	0.0156658	0.0014217	1833.13	0.154424	-1.56927	1.21206
605	0.670059	4713.11	tau	tau_sk	Rep (u*D)	0.051711	2.96136	0.0865799	0.0863416	1.17354	-1.48413		605	0.67145	4681.61	Rep (u*D)	tau_sk	Cf	0.0156658	0.0014217	1833.13	-1.56927	1.21206	0.154424
606	0.670059	4713.11	tau_sk	Rep (u*D)	tau	0.051711	2.96136	0.0865799	1.17354	-1.48413	0.0863416		606	0.67145	4681.61	Cf	tau_sk	Rep (u*D)	0.0156658	0.0014217	1833.13	0.154424	1.21206	-1.56927
607	0.669158	4726.8	did50	Rep (u*D)	tau_sk	0.569669	0.0307457	0.75988	-0.029253	-1.45152	1.22614		607	0.671449	4681.61	Rep (u*D)	h/Kc	tau_sk	0.00125866	1.43034	11.7969	-1.5693	-0.0514729	1.21203
608	0.669158	4726.8	Rep (u*D)	did50	tau_sk	0.569669	0.0307457	0.75988	-1.45152	-0.029253	1.22614		608	0.671449	4681.61	Rep (u*D)	tau_sk	h/Kc	0.00125866	1.43034	11.7969	-1.5693	1.21203	-0.0514729
609	0.669158	4726.8	did50	tau_sk	Rep (u*D)	0.569669	0.0307457	0.75988	-0.029253	1.22614	-1.45152		609	0.671449	4681.61	tau_sk	Rep (u*D)	h/Kc	0.00125866	1.43034	11.7969	1.21203	-1.5693	-0.0514729
610	0.669158	4726.8	tau_sk	did50	Rep (u*D)	0.569669	0.0307457	0.75988	1.22614	-0.029253	-1.45152		610	0.671449	4681.61	h/Kc	Rep (u*D)	tau_sk	0.00125866	1.43034	11.7969	-0.0514729	-1.5693	1.21203
611	0.669158	4726.8	Rep (u*D)	tau_sk	did50	0.569669	0.0307457	0.75988	-1.45152	1.22614	-0.029253		611	0.671449	4681.61	h/Kc	tau_sk	Rep (u*D)	0.00125866	1.43034	11.7969	-0.0514729	1.21203	-1.5693
612	0.669158	4726.8	tau_sk	Rep (u*D)	did50	0.569669	0.0307457	0.75988	1.22614	-1.45152	-0.029253		612	0.671449	4681.61	tau_sk	h/Kc	Rep (u*D)	0.00125866	1.43034	11.7969	1.21203	-0.0514729	-1.5693
613	0.669092	4730.78	Rep (u*D)	Rep (u*D)	tau_sk	2851.94	0.0162588	0.000292064	-2.48686	1.03358	1.23291		613	0.662923	4687.99	Fr	h/D50	u*_sk/ws	161.068	0.000647032	0.0181805	-0.330715	-0.410874	1.69163
614	0.669092	4730.78	Rep (u*D)	tau_sk	Rep (u*D)	2851.94	0.0162588	0.000292064	-2.48686	1.23291	1.03358		614	0.662923	4687.99	h/D50	Fr	u*_sk/ws	161.068	0.000647032	0.0181805	-0.410874	-0.330715	1.69163
615	0.669092	4730.78	tau_sk	Rep (u*D)	Rep (u*D)	2851.94	0.0162588	0.000292064	1.23291	-2.48686	1.03358		615	0.662923	4687.99	Fr	u*_sk/ws	h/D50	161.068	0.000647032	0.0181805	-0.330715	1.69163	-0.410874
616	0.669092	4730.77	tau_sk	Rep (u*D)	tau_sk	0.724292	0.0314387	0.594684	0.964384	-1.45325	0.268521		616	0.662923	4687.99	u*_sk/ws	Fr	h/D50	161.068	0.000647032	0.0181805	1.69163	-0.330715	-0.410874
617	0.669092	4730.77	Rep (u*D)	tau_sk	tau_sk	0.724292	0.0314387	0.594684	-1.45325	0.964384	0.268521		617	0.662923	4687.99	h/D50	u*_sk/ws	Fr	161.068	0.000647032	0.0181805	-0.410874	1.69163	-0.330715
618	0.669092	4730.77	tau_sk	tau_sk	Rep (u*D)	0.724292	0.0314387	0.594684	0.964384	0.268521	-1.45325		618	0.662923	4687.99	u*_sk/ws	h/D50	Fr	161.068	0.000647032	0.0181805	1.69163	-0.410874	-0.330715
619	0.66784	4588.47	u*_sk/ws	tau_sk	tau	248.571	0.0227254	2.08403e-05	1.49723	0.821083	-0.301178		619	0.669861	4710.16	tau_sk	tau	Rep (u*D)	31.5495	0.00348087	0.118788	1.13585	0.0994279	-1.49319
620	0.66784	4588.47	tau_sk	u*_sk/ws	tau	248.571	0.0227254	2.08403e-05	0.821083	1.49723	-0.301178		620	0.669861	4710.16	tau	tau_sk	Rep (u*D)	31.5495	0.00348087	0.118788	0.0994279	1.13585	-1.49319
621	0.66784	4588.47	u*_sk/ws	tau	tau_sk	248.571	0.0227254	2.08403e-05	1.49723	-0.301178	0.821083		621	0.669861	4710.16	Rep (u*D)	tau_sk	tau	31.5495	0.00348087	0.118788	-1.49319	1.13585	0.0994279
622	0.66784	4588.47	tau	u*_sk/ws	tau_sk	248.571	0.0227254	2.08403e-05	-0.301178	1.49723	0.821083		622	0.669861	4710.16	tau_sk	Rep (u*D)	tau	31.5495	0.00348087	0.118788	1.13585	-1.49319	0.0994279
623	0.66784	4588.47	tau_sk	tau	u*_sk/ws	248.571	0.0227254	2.08403e-05	0.821083	-0.301178	1.49723		623	0.669861	4710.16	Rep (u*D)	tau	tau_sk	31.5495	0.00348087	0.118788	-1.49319	0.0994279	1.13585
624	0.66784	4588.47	tau	tau_sk	u*_sk/ws	248.571	0.0227254	2.08403e-05	-0.301178	0.821083	1.49723		624	0.669861	4710.16	tau	Rep (u*D)	tau_sk	31.5495	0.00348087	0.118788	0.0994279	-1.49319	1.13585
625	0.667218	4594.26	h/D50	Rep (u*D)	u*/ws	0.259792	1.76543e-05	55019.8	-0.532709	-1.32772	1.07931		625	0.668829	4721.86	did50	Rep (u*D)	tau_sk	1.63918	0.0102189	0.760441	-0.0747229	-1.45128	1.1883
626	0.667218	4594.26	Rep (u*D)	h/D50	u*/ws	0.259792	1.76543e-05	55019.8	-1.32772	-0.532709	1.07931		626	0.668829	4721.86	Rep (u*D)	did50	tau_sk	1.63918	0.0102189	0.760441	-1.45128	-0.0747229	1.1883
627	0.667218	4594.26	h/D50	u*/ws	Rep (u*D)	0.259792	1.76543e-05	55019.8	-0.532709	1.07931	-1.32772		627	0.668829	4721.86	did50	tau_sk	Rep (u*D)	1.63918	0.0102189	0.760441	-0.0747229	1.1883	-1.45128
628	0.667218	4594.26	u*/ws	h/D50	Rep (u*D)	0.259792	1.76543e-05	55019.8	1.07931	-0.532709	-1.32772		628	0.668829	4721.86	tau_sk	did50	Rep (u*D)	1.63918	0.0102189	0.760441	1.1883	-0.0747229	-1.45128
629	0.667218	4594.26	Rep (u*D)	u*/ws	h/D50	0.259792	1.76543e-05	55019.8	-1.32772	1.07931	-0.532709		629	0.668829	4721.86	Rep (u*D)	tau_sk	did50	1.63918	0.0102189	0.760441	-1.45128	1.1883	-0.0747229
630	0.667218	4594.26	u*/ws	Rep (u*D)	h/D50	0.259792	1.76543e-05	55019.8	1.07931	-1.32772	-0.532709		630	0.668829	4721.86	tau_sk	Rep (u*D)	did50	1.63918	0.0102189	0.760441	1.1883	-1.45128	-0.0747229
631	0.665602	4741.81	Rep	Rep (u*_sk D)	tau_sk	0.0111282	4.46627	0.0570418	-0.735555	-0.449977	1.30105		631	0.66891	4728.05	Rep (u*D)	tau_sk	Rep (u*D)	131381	0.00550279	1.83947e-05	-5.42667	1.20433	3.97128
632	0.665602	4741.81	Rep	tau_sk	Rep (u*_sk D)	0.0111282	4.46627	0.0570418	-0.735555	1.30105	-0.449977		632	0.66891	4728.05	tau_sk	Rep (u*D)	Rep (u*D)	131381	0.00550279	1.83947e-05	1.20433	-5.42667	3.97128
633	0.665602	4741.81	Rep (u*_sk D)	Rep	tau_sk	0.0111282	4.46627	0.0570418	-0.449977	-0.735555	1.30105		633	0.66891	4728.05	Rep (u*D)	Rep (u*D)	tau_sk	131381	0.00550279	1.83947e-05	-5.42667	3.97128	1.20433
634	0.665602	4741.81	Rep (u*_sk D)	tau_sk	Rep	0.0111282	4.46627	0.0570418	-0.449977	1.30105	-0.735555		634	0.668909	4728.05	Rep (u*D)	tau_sk	tau_sk	0.426728	0.0507441	0.614119	-1.45539	0.920793	0.283514
635	0.665602	4741.81	tau_sk	Rep (u*_sk D)	Rep	0.0111282	4.46627	0.0570418	1.30105	-0.449977	-0.735555		635	0.668909	4728.05	tau_sk	Rep (u*D)	tau_sk	0.426728	0.0507441	0.614119	0.920793	-1.45539	0.283514
636	0.665602	4741.81	tau_sk	Rep	Rep (u*_sk D)	0.0111282	4.46627	0.0570418	1.30105	-0.735555	-0.449977		636	0.668909	4728.05	tau_sk	tau_sk	Rep (u*D)	0.426728	0.0507441	0.614119	0.920793	0.283514	-1.45539
637	0.664324	4661.32	Cf	u*_sk/ws	tau_sk	7.58163e-05	0.252905	0.725856	-0.406178	1.14345	0.809524		637	0.665488	4740.12	Rep (u*_sk D)	Rep	tau_sk	0.000438757	0.0189672	344.156	-0.466607	-0.733967	1.27862
638	0.664324	4661.32	u*_sk/ws	Cf	tau_sk	7.58163e-05	0.252905	0.725856	1.14345	-0.406178	0.809524		638	0.665488	4740.12	Rep	Rep (u*_sk D)	tau_sk	0.000438757	0.0189672	344.156	-0.733967	-0.466607	1.27862
639	0.664324	4661.32	Cf	tau_sk	u*_sk/ws	7.58163e-05	0.252905	0.725856	-0.406178	0.809524	1.14345		639	0.665488	4740.12	Rep (u*_sk D)	tau_sk	Rep	0.000438757	0.0189672	344.156	-0.466607	1.27862	-0.733967
640	0.664324	4661.32	tau_sk	Cf	u*_sk/ws	7.58163e-05	0.252905	0.725856	0.809524	-0.406178	1.14345		640	0.665488	4740.12	tau_sk	Rep (u*_sk D)	Rep	0.000438757	0.0189672	344.156	1.27862	-0.466607	-0.733967
641	0.664324	4661.32	u*_sk/ws	tau_sk	Cf	7.58163e-05	0.252905	0.725856	1.14345	0.809524	-0.406178		641	0.665488	4740.12	Rep	tau_sk	Rep (u*_sk D)	0.000438757	0.0189672	344.156	-0.733967	1.27862	-0.466607
642	0.664324	4661.32	tau_sk	u*_sk/ws	Cf	7.58163e-05	0.252905	0.725856	0.809524	1.14345	-0.406178		642	0.665488	4740.12	tau_sk	Rep	Rep (u*_sk D)	0.000438757	0.0189672	344.156	1.27862	-0.733967	-0.466607
643	0.662052	4792.06	Rep	tau_sk	tau	3.39312e+07	0.00299432	1.38041e-08	-0.979138	1.12379	0.221621		643	0.655106	4766.73	tau_sk	Rep (u*_sk D)	u*_sk/ws	5.09745	1.76498e-12	1.19987e+07	0.677719	-0.0849846	1.45126
644	0.662052	4792.06	tau_sk	Rep	tau	3.39312e+07	0.00299432	1.38041e-08	1.12379	-0.979138	0.221621		644	0.655106	4766.73	Rep (u*_sk D)	u*_sk/ws	tau_sk	5.09745	1.76498e-12	1.19987e+07	-0.0849846	1.45126	0.677719
645	0.662052	4792.06	Rep	tau	tau_sk	3.39312e+07	0.00299432	1.38041e-08	-0.979138	0.221621	1.12379		645	0.655106	4766.73	u*_sk/ws	Rep (u*_sk D)	tau_sk	5.09745	1.76498e-12	1.19987e+07	1.45126	-0.0849846	0.677719
646	0.662052	4792.06	tau	Rep	tau_sk	3.39312e+07	0.00299432	1.38041e-08	0.221621	-0.979138	1.12379		646	0.655106	4766.73	Rep (u*_sk D)	tau_sk	u*_sk/ws	5.09745	1.76498e-12	1.19987e+07	-0.0849846	0.677719	1.45126
647	0.662052	4792.06	tau_sk	tau	Rep	3.39312e+07	0.00299432	1.38041e-08	1.12379	0.221621	-0.979138		647	0.655106	4766.73	u*_sk/ws	tau_sk	Rep (u*_sk D)	5.09745	1.76498e-12	1.19987e+07	1.45126	0.677719	-0.0849846
648	0.662052	4792.06	tau	tau_sk	Rep	3.39312e+07	0.00299432	1.38041e-08	0.221621	1.12379	-0.979138		648	0.655106	4766.73	tau_sk	u*_sk/ws	Rep (u*_sk D)	5.09745	1.76498e-12	1.19987e+07	0.677719	1.45126	-0.0849846
649	0.66147	4794.45	Fr	Rep (u*_sk D)	Rep	201698	4.0978e-20	4.10004e+13	1.81916	-1.93336	-0.15308		649	0.659294	4769.57	Rep	u*_sk/ws	tau	0.000750646	0.00461993	36.5509	-0.605379	1.33514	0.315569
650	0.66147	4794.45	Rep (u*_sk D)	Fr	Rep	201698	4.0978e-20	4.10004e+13	-1.93336	1.81916	-0.15308		650	0.659294	4769.57	u*_sk/ws	Rep	tau	0.000750646	0.00461993	36.5509	1.33514	-0.605379	0.315569
651	0.66147	4794.45	Fr	Rep	Rep (u*_sk D)	201698	4.0978e-20	4.10004e+13	1.81916	-0.15308	-1.93336		651	0.659294	4769.57	Rep	tau	u*_sk/ws	0.000750646	0.00461993	36.5509	-0.605379	0.315569	1.33514
652	0.66147	4794.45	Rep	Fr	Rep (u*_sk D)	201698	4.0978e-20	4.10004e+13	-0.15308	1.81916	-1.93336		652	0.659294	4769.57	tau	Rep	u*_sk/ws	0.000750646	0.00461993	36.5509	0.315569	-0.605379	1.33514
653	0.66147	4794.45	Rep (u*_sk D)	Rep	Fr	201698	4.0978e-20	4.10004e+13	-1.93336	-0.15308	1.81916		653	0.659294	4769.57	u*_sk/ws	tau	Rep	0.000750646	0.00461993	36.5509	1.33514	0.315569	-0.605379
654	0.66147	4794.45	Rep	Rep (u*_sk D)	Fr	201698	4.0978e-20	4.10004e+13	-0.15308	-1.93336	1.81916		654	0.659294	4769.57	tau	u*_sk/ws	Rep	0.000750646	0.00461993	36.5509	0.315569	1.33514	-0.605379
655	0.660198	4814.09	Fr	h/Kc	Rep (u*_sk D)	3.7951	0.232662	0.441804	1.882	0.0255138	-2.11484		655	0.654787	4769.82	u*_sk/ws	tau_sk	tau_sk	106.745	1.34886e-08	60.0367	1.51514	2.88237	-2.23639
656	0.660198	4814.09	h/Kc	Fr	Rep (u*_sk D)	3.7951	0.232662	0.441804	0.0255138	1.882	-2.11484		656	0.654787	4769.82	tau_sk	tau_sk	u*_sk/ws	106.745	1.34886e-08	60.0367	2.88237	-2.23639	1.51514
657	0.660198	4814.09	Fr	Rep (u*_sk D)	h/Kc	3.7951	0.232662	0.441804	1.882	-2.11484	0.0255138		657	0.654787	4769.82	tau_sk	u*_sk/ws	tau_sk	106.745	1.34886e-08	60.0367	2.88237	1.51514	-2.23639
658	0.660198	4814.09	Rep (u*_sk D)	Fr	h/Kc	3.7951	0.232662	0.441804	-2.11484	1.882	0.0255138		658	0.654787	4769.82	u*_sk/ws	u*_sk/ws	tau_sk	0.000182984	0.107806	4.38208	1.4693	0.0458215	0.645985
659	0.660198	4814.09	h/Kc	Rep (u*_sk D)	Fr	3.7951	0.232662	0.441804	0.0255138	-2.11484	1.882		659	0.654787	4769.82	tau_sk	u*_sk/ws	u*_sk/ws	0.000182984	0.107806	4.38208	0.645985	1.4693	0.0458215
660	0.660198	4814.09	Rep (u*_sk D)	h/Kc	Fr	3.7951	0.232662	0.441804	-2.11484	0.0255138	1.882		660	0.654787	4769.82	u*_sk/ws	tau_sk	u*_sk/ws	0.000182984	0.107806	4.38208	1.4693	0.645985	0.0458215
661	0.660198	4814.1	h/Kc	Rep (u*_sk D)	S	0.00566242	307.683	12.0171	0.339197	-2.11484	0.941015		661	0.657211	4780.37	did50	Fr	h/D50	6.82703e-07	1.49284e+13	5.71321e-13	-2.16146	3.82018	1.04548
662	0.660198	4814.1	Rep (u*_sk D)	h/Kc	S	0.00566242	307.683	12.0171	-2.11484	0.339197	0.941015		662	0.657211	4780.37	Fr	did50	h/D50	6.82703e-07	1.49284e+13	5.71321e-13	3.82018	-2.16146	1.04548
663	0.660198	4814.1	h/Kc	S	Rep (u*_sk D)	0.00566242	307.683	12.0171	0.339197	0.941015	-2.11484		663	0.657211	4780.37	h/D50	did50	Fr	6.82703e-07	1.49284e+13	5.71321e-13	1.04548	-2.16146	3.82018
664	0.660198	4814.1	S	h/Kc	Rep (u*_sk D)	0.00566242	307.683	12.0171	0.941015	0.339197	-2.11484		664	0.657211	4780.37	Fr	h/D50	did50	6.82703e-07	1.49284e+13	5.71321e-13	3.82018	1.04548	-2.16146
665	0.660198	4814.1	Rep (u*_sk D)	S	h/Kc	0.00566242	307.683	12.0171	-2.11484	0.941015	0.339197		665	0.657211	4780.37	h/D50	Fr	did50	6.82703e-07	1.49284e+13	5.71321e-13	1.04548	3.82018	-2.16146
666	0.660198	4814.1	S	Rep (u*_sk D)	h/Kc	0.00566242	307.683	12.0171	0.941015	-2.11484	0.339197		666	0.657211	4780.37	did50	h/D50	Fr	6.82703e-07	1.49284e+13	5.71321e-13	-2.16146	1.04548	3.82018
667	0.660198	4814.09	Rep (u*_sk D)	Cf	S	1.69071e-05	614.699	27.1589	-2.11493	-1.01754	0.941023		667	0.661938	4790.37	tau_sk	tau	Rep	1.49079e-06	0.342357	2714.71	1.09088	0.234774	-0.99074
668	0.660198	4814.09	Cf	Rep (u*_sk D)	S	1.69071e-05	614.699	27.1589	-1.01754	-2.11493	0.941023		668	0.661938	4790.37	Rep	tau_sk	tau	1.49079e-06	0.342357	2714.71	-0.99074	1.09088	0.234774
669	0.660198	4814.09	Rep (u*_sk D)	S	Cf	1.69071e-05	614.699	27.1589	-2.11493	0.941023	-1.01754		669	0.661938	4790.37	tau_sk	Rep	tau	1.49079e-06	0.342357	2714.71	1.09088	-0.99074	0.234774
670	0.660198	4814.09	S	Rep (u*_sk D)	Cf	1.69071e-05	614.699	27.1589	0.941023	-2.11493	-1.01754		670	0.661938	4790.37	Rep	tau	tau_sk	1.49079e-06	0.342357	2714.71	-0.99074	0.234774	1.09088
671	0.660198	4814.09	Cf	S	Rep (u*_sk D)	1.69071e-05	614.699	27.1589	-1.01754	0.941023	-2.11493		671	0.661938	4790.37	tau	Rep	tau_sk	1.49079e-06	0.342357	2714.71	0.234774	-0.99074	1.09088
672	0.660198	4814.09	S	Cf	Rep (u*_sk D)	1.69071e-05	614.699	27.1589	0.941023	-1.01754	-2.11493		672	0.661938	4790.37	tau	tau_sk	Rep	1.49079e-06	0.342357	2714.71	0.234774	1.09088	-0.99074
673	0.659991	4799.96	Fr	Rep (u*_sk D)	Rep (u*D)	23.0987	0.0661541	0.359601	2.02437	-2.45521	0.276569		673	0.661364	4792.89	Fr	Rep (u*_sk D)	Rep	4322.44	8.73805e-18	8.88891e+12	1.81188	-1.95437	-0.133742
674	0.659991	4799.96	Rep (u*_sk D)	Fr	Rep (u*D)	23.0987	0.0661541	0.359601	-2.45521	2.02437	0.276569		674	0.661364	4792.89	Rep (u*_sk D)	Fr	Rep	4322.44	8.73805e-18	8.88891e+12	-1.95437	1.81188	-0.133742
675	0.659991	4799.96	Fr	Rep (u*D)	Rep (u*_sk D)	23.0987	0.0661541	0.359601	2.02437	0.276569	-2.45521		675	0.661364	4792.89	Fr	Rep	Rep (u*_sk D)	4322.44	8.73805e-18	8.88891e+12	1.81188	-0.133742	-1.95437
676	0.659991	4799.96	Rep (u*D)	Fr	Rep (u*_sk D)	23.0987	0.0661541	0.359601	0.276569	2.02437	-2.45521		676	0.661364	4792.89	Rep	Fr	Rep (u*_sk D)	4322.44	8.73805e-18	8.88891e+12	-0.133742	1.81188	-1.95437
677	0.659991	4799.96	Rep (u*_sk D)	Rep (u*D)	Fr	23.0987	0.0661541	0.359601	-2.45521	0.276569	2.02437		677	0.661364	4792.89	Rep (u*_sk D)	Rep	Fr	4322.44	8.73805e-18	8.88891e+12	-1.95437	-0.133742	1.81188
678	0.659991	4799.96	Rep (u*D)	Rep (u*_sk D)	Fr	23.0987	0.0661541	0.359601	0.276569	-2.45521	2.02437		678	0.661364	4792.89	Rep	Rep (u*_sk D)	Fr	4322.44	8.73805e-18	8.88891e+12	-0.133742	-1.95437	1.81188
679	0.659686	4819.38	Fr	Rep (u*_sk D)	S	1.27423	0.735929	0.237858	2.00505	-2.1131	-0.0946226		679	0.659824	4797.65	Fr	Rep (u*_sk D)	Rep (u*D)	2.07398e-08	496352	53.206	2.03979	-2.56224	0.369459
680	0.659686	4819.38	Rep (u*_sk D)	Fr	S	1.27423	0.735929	0.237858	-2.1131	2.00505	-0.0946226		680	0.659824	4797.65	Rep (u*_sk D)	Fr	Rep (u*D)	2.07398e-08	496352	53.206	-2.56224	2.03979	0.369459
681	0.659686	4819.38	Fr	S	Rep (u*_sk D)	1.27423	0.735929	0.237858	2.00505	-0.0946226	-2.1131		681	0.659824	4797.65	Fr	Rep (u*D)	Rep (u*_sk D)	2.07398e-08	496352	53.206	2.03979	0.369459	-2.56224
682	0.659686	4819.38	S	Fr	Rep (u*_sk D)	1.27423	0.735929	0.237858	-0.0946226	2.00505	-2.1131		682	0.659824	4797.65	Rep (u*D)	Fr	Rep (u*_sk D)	2.07398e-08	496352	53.206	0.369459	2.03979	-2.56224
683	0.659686	4819.38	S	Rep (u*_sk D)	Fr	1.27423	0.735929	0.237858	-0.0946226	-2.1131	2.00505		683	0.659824	4797.65	Rep (u*_sk D)	Rep (u*D)	Fr	2.07398e-08	496352	53.206	-2.56224	0.369459	2.03979
684	0.659686	4819.38	Rep (u*_sk D)	S	Fr	1.27423	0.735929	0.237858	-2.1131	-0.0946226	2.00505		684	0.659824	4797.65	Rep (u*D)	Rep (u*_sk D)	Fr	2.07398e-08	496352	53.206	0.369459	-2.56224	2.03979
685	0.659546	4821.58	Fr	Rep (u*_sk D)	Cf	20350.3	45.7907	4.47859e-07	1.94858	-2.12153	-0.0322641		685	0.660015	4811.47	Fr	Rep (u*_sk D)	Cf	2678.97	10.771	1.11173e-05	1.87414	-2.12081	-0.0513036
686	0.659546	4821.58	Rep (u*_sk D)	Fr	Cf	20350.3	45.7907	4.47859e-07	-2.12153	1.94858	-0.0322641		686	0.660015	4811.47	Rep (u*_sk D)	Fr	Cf	2678.97	10.771	1.11173e-05	-2.12081	1.87414	-0.0513036
687	0.659546	4821.58	Fr	Cf	Rep (u*_sk D)	20350.3	45.7907	4.47859e-07	1.94858	-0.0322641	-2.12153		687	0.660015	4811.47	Fr	Cf	Rep (u*_sk D)	2678.97	10.771	1.11173e-05	1.87414	-0.0513036	-2.12081
688	0.659546	4821.58	Cf	Fr	Rep (u*_sk D)	20350.3	45.7907	4.47859e-07	-0.0322641	1.94858	-2.12153		688	0.660015	4811.47	Rep (u*_sk D)	Cf	Fr	2678.97	10.771	1.11173e-05	-2.12081	-0.0513036	1.87414
689	0.659546	4821.58	Rep (u*_sk D)	Cf	Fr	20350.3	45.7907	4.47859e-07	-2.12153	-0.0322641	1.94858		689	0.660015	4811.47	Cf	Rep (u*_sk D)	Fr	2678.97	10.771	1.11173e-05	-0.0513036	-2.12081	1.87414
690	0.659546	4821.58	Cf	Rep (u*_sk D)	Fr	20350.3	45.7907	4.47859e-07	-0.0322641	-2.12153	1.94858		690	0.660015	4811.47	Cf	Fr	Rep (u*_sk D)	2678.97	10.771	1.11173e-05	-0.0513036	1.87414	-2.12081
691	0.659526	4772.96	Rep	u*_sk/ws	tau	22.4325	0.000129661	0.0442045	-0.605234	1.34575	0.279565		691	0.660015	4811.47	Rep (u*_sk D)	Cf	S	15.1784	151.403	0.000139601	-2.12083	-0.988362	0.937066
692	0.659526	4772.96	u*_sk/ws	Rep	tau	22.4325	0.000129661	0.0442045	1.34575	-0.605234	0.279565		692	0.660015	4811.47	Rep (u*_sk D)	S	Cf	15.1784	151.403	0.000139601	-2.12083	0.937066	-0.988362
693	0.659526	4772.96	Rep	tau	u*_sk/ws	22.4325	0.000129661	0.0442045	-0.605234	0.279565	1.34575		693	0.660015	4811.47	S	Rep (u*_sk D)	Cf	15.1784	151.403	0.000139601	0.937066	-2.12083	-0.988362
694	0.659526	4772.96	tau	Rep	u*_sk/ws	22.4325	0.000129661	0.0442045	0.279565	-0.605234	1.34575		694	0.660015	4811.47	Cf	Rep (u*_sk D)	S	15.1784	151.403	0.000139601	-0.988362	-2.12083	0.937066
695	0.659526	4772.96	u*_sk/ws	tau	Rep	22.4325	0.000129661	0.0442045	1.34575	0.279565	-0.605234		695	0.660015	4811.47	Cf	S	Rep (u*_sk D)	15.1784	151.403	0.000139601	-0.988362	0.937066	-2.12083
696	0.659526	4772.96	tau	u*_sk/ws	Rep	22.4325	0.000129661	0.0442045	0.279565	1.34575	-0.605234		696	0.660015	4811.47	S	Cf	Rep (u*_sk D)	15.1784	151.403	0.000139601	0.937066	-0.988362	-2.12083
697	0.659184	4818.91	Rep (u*_sk D)	Rep (u*_sk D)	Fr	0.00161466	255.448	1.18804	0.244221	-2.38993	1.91771		697	0.660015	4811.47	Fr	h/Kc	Rep (u*_sk D)	11.8417	0.435554	0.0772837	1.87416	0.0170998	-2.1208
698	0.659184	4818.91	Fr	Rep (u*_sk D)	Rep (u*_sk D)	0.00161466	255.448	1.18804	1.91771	0.244221	-2.38993		698	0.660015	4811.47	Rep (u*_sk D)	Fr	h/Kc	11.8417	0.435554	0.0772837	-2.1208	1.87416	0.0170998
699	0.659184	4818.91	Rep (u*_sk D)	Fr	Rep (u*_sk D)	0.00161466	255.448	1.18804	0.244221	1.91771	-2.38993		699	0.660015	4811.47	Rep (u*_sk D)	h/Kc	Fr	11.8417	0.435554	0.0772837	-2.1208	0.0170998	1.87416
700	0.659184	4818.91	Fr	Fr	Rep (u*_sk D)	15.3913	0.048722	0.65348	0.647868	1.26982	-2.14576		700	0.660015	4811.47	h/Kc	Fr	Rep (u*_sk D)	11.8417	0.435554	0.0772837	0.0170998	1.87416	-2.1208
701	0.659184	4818.91	Fr	Rep (u*_sk D)	Fr	15.3913	0.048722	0.65348	0.647868	-2.14576	1.26982		701	0.660015	4811.47	Fr	Rep (u*_sk D)	h/Kc	11.8417	0.435554	0.0772837	1.87416	-2.1208	0.0170998
702	0.659184	4818.91	Rep (u*_sk D)	Fr	Fr	15.3913	0.048722	0.65348	-2.14576	0.647868	1.26982		702	0.660015	4811.47	h/Kc	Rep (u*_sk D)	Fr	11.8417	0.435554	0.0772837	0.0170998	-2.1208	1.87416
703	0.658379	4832.87	Rep	tau	Fr	0.00212013	4.40275	0.526649	-1.14075	0.760129	0.996246		703	0.659784	4812.35	Fr	Rep (u*_sk D)	S	0.751897	1.13425	0.422053	1.94685	-2.13997	-0.0364509
704	0.658379	4832.87	Fr	Rep	tau	0.00212013	4.40275	0.526649	0.996246	-1.14075	0.760129		704	0.659784	4812.35	Rep (u*_sk D)	Fr	S	0.751897	1.13425	0.422053	-2.13997	1.94685	-0.0364509
705	0.658379	4832.87	Rep	Fr	tau	0.00212013	4.40275	0.526649	-1.14075	0.996246	0.760129		705	0.659784	4812.35	Fr	S	Rep (u*_sk D)	0.751897	1.13425	0.422053	1.94685	-0.0364509	-2.13997
706	0.658379	4832.87	Fr	tau	Rep	0.00212013	4.40275	0.526649	0.996246	0.760129	-1.14075		706	0.659784	4812.35	S	Fr	Rep (u*_sk D)	0.751897	1.13425	0.422053	-0.0364509	1.94685	-2.13997
707	0.658379	4832.87	tau	Fr	Rep	0.00212013	4.40275	0.526649	0.760129	0.996246	-1.14075		707	0.659784	4812.35	Rep (u*_sk D)	S	Fr	0.751897	1.13425	0.422053	-2.13997	-0.0364509	1.94685
708	0.658379	4832.87	tau	Rep	Fr	0.00212013	4.40275	0.526649	0.760129	-1.14075	0.996246		708	0.659784	4812.35	S	Rep (u*_sk D)	Fr	0.751897	1.13425	0.422053	-0.0364509	-2.13997	1.94685
709	0.657468	4784.06	did50	Fr	h/D50	2.79633e+11	7.40702e-26	3.44123e+08	-2.13191	3.74776	1.01193		709	0.659112	4817.85	Rep (u*_sk D)	Rep (u*_sk D)	Fr	7.87161e-08	1.26631e+06	4.67824	6.79357	-8.93757	1.89786
710	0.657468	4784.06	Fr	did50	h/D50	2.79633e+11	7.40702e-26	3.44123e+08	3.74776	-2.13191	1.01193		710	0.659112	4817.85	Fr	Rep (u*_sk D)	Rep (u*_sk D)	7.87161e-08	1.26631e+06	4.67824	1.89786	6.79357	-8.93757
711	0.657468	4784.06	did50	h/D50	Fr	2.79633e+11	7.40702e-26	3.44123e+08	-2.13191	1.01193	3.74776		711	0.659112	4817.85	Rep (u*_sk D)	Fr	Rep (u*_sk D)	7.87161e-08	1.26631e+06	4.67824	6.79357	1.89786	-8.93757
712	0.657468	4784.06	h/D50	did50	Fr	2.79633e+11	7.40702e-26	3.44123e+08	1.01193	-2.13191	3.74776		712	0.659112	4817.85	Fr	Fr	Rep (u*_sk D)	13.9612	0.0737745	0.452722	0.614843	1.283	-2.14398
713	0.657468	4784.06	Fr	h/D50	did50	2.79633e+11	7.40702e-26	3.44123e+08	3.74776	1.01193	-2.13191		713	0.659112	4817.85	Fr	Rep (u*_sk D)	Fr	13.9612	0.0737745	0.452722	0.614843	-2.14398	1.283
714	0.657468	4784.06	h/D50	Fr	did50	2.79633e+11	7.40702e-26	3.44123e+08	1.01193	3.74776	-2.13191		714	0.659112	4817.85	Rep (u*_sk D)	Fr	Fr	13.9612	0.0737745	0.452722	-2.14398	0.614843	1.283
715	0.656169	4883.85	tau_sk	tau_sk	Rep	385515	1.13423	3.73692e-09	5.1383	-3.85822	-0.911313		715	0.658311	4831.88	Rep	Fr	tau	0.00416679	3.715	0.306088	-1.14674	0.973363	0.76535
716	0.656169	4883.85	Rep	tau_sk	tau_sk	385515	1.13423	3.73692e-09	-0.911313	5.1383	-3.85822		716	0.658311	4831.88	Rep	tau	Fr	0.00416679	3.715	0.306088	-1.14674	0.76535	0.973363
717	0.656169	4883.85	tau_sk	Rep	tau_sk	385515	1.13423	3.73692e-09	5.1383	-0.911313	-3.85822		717	0.658311	4831.88	tau	Rep	Fr	0.00416679	3.715	0.306088	0.76535	-1.14674	0.973363
718	0.656169	4883.85	tau_sk	Rep	Rep	0.415865	0.0943671	0.0416392	1.28009	1.30649	-2.21783		718	0.658311	4831.88	Fr	Rep	tau	0.00416679	3.715	0.306088	0.973363	-1.14674	0.76535
719	0.656169	4883.85	Rep	Rep	tau_sk	0.415865	0.0943671	0.0416392	1.30649	-2.21783	1.28009		719	0.658311	4831.88	Fr	tau	Rep	0.00416679	3.715	0.306088	0.973363	0.76535	-1.14674
720	0.656169	4883.85	Rep	tau_sk	Rep	0.415865	0.0943671	0.0416392	1.30649	1.28009	-2.21783		720	0.658311	4831.88	tau	Fr	Rep	0.00416679	3.715	0.306088	0.76535	0.973363	-1.14674
721	0.655197	4768.05	Rep (u*_sk D)	u*_sk/ws	tau_sk	7.45262	4.88963e-09	3198.21	-0.105994	1.41427	0.685188		721	0.656065	4882.31	Rep	tau_sk	tau_sk	6764.23	0.00104441	0.00022981	-0.917128	3.2799	-2.02461
722	0.655197	4768.05	u*_sk/ws	Rep (u*_sk D)	tau_sk	7.45262	4.88963e-09	3198.21	1.41427	-0.105994	0.685188		722	0.656065	4882.31	tau_sk	Rep	tau_sk	6764.23	0.00104441	0.00022981	3.2799	-0.917128	-2.02461
723	0.655197	4768.05	Rep (u*_sk D)	tau_sk	u*_sk/ws	7.45262	4.88963e-09	3198.21	-0.105994	0.685188	1.41427		723	0.656065	4882.31	tau_sk	tau_sk	Rep	6764.23	0.00104441	0.00022981	3.2799	-2.02461	-0.917128
724	0.655197	4768.05	tau_sk	Rep (u*_sk D)	u*_sk/ws	7.45262	4.88963e-09	3198.21	0.685188	-0.105994	1.41427		724	0.656066	4882.31	Rep	Rep	tau_sk	1412.39	0.0869073	1.3227e-05	-3.11633	2.19919	1.25529
725	0.655197	4768.05	u*_sk/ws	tau_sk	Rep (u*_sk D)	7.45262	4.88963e-09	3198.21	1.41427	0.685188	-0.105994		725	0.656066	4882.31	Rep	tau_sk	Rep	1412.39	0.0869073	1.3227e-05	-3.11633	1.25529	2.19919
726	0.655197	4768.05	tau_sk	u*_sk/ws	Rep (u*_sk D)	7.45262	4.88963e-09	3198.21	0.685188	1.41427	-0.105994		726	0.656066	4882.31	tau_sk	Rep	Rep	1412.39	0.0869073	1.3227e-05	1.25529	-3.11633	2.19919
727	0.654867	4770.99	u*_sk/ws	tau_sk	tau_sk	6453.23	3.87762e-06	0.00351199	1.49648	3.68209	-3.03999		727	0.64929	4897.94	tau	u*_sk/ws	Cf	1.24602e-11	4962.47	27.3134	0.389938	1.61825	-0.580028
728	0.654867	4770.99	tau_sk	u*_sk/ws	tau_sk	6453.23	3.87762e-06	0.00351199	3.68209	1.49648	-3.03999		728	0.64929	4897.94	Cf	u*_sk/ws	tau	1.24602e-11	4962.47	27.3134	-0.580028	1.61825	0.389938
729	0.654867	4770.99	tau_sk	tau_sk	u*_sk/ws	6453.23	3.87762e-06	0.00351199	3.68209	-3.03999	1.49648		729	0.64929	4897.94	u*_sk/ws	Cf	tau	1.24602e-11	4962.47	27.3134	1.61825	-0.580028	0.389938
730	0.654867	4770.99	u*_sk/ws	u*_sk/ws	tau_sk	7.38339e-06	0.0204566	581.847	0.697727	0.798748	0.642091		730	0.64929	4897.94	Cf	tau	u*_sk/ws	1.24602e-11	4962.47	27.3134	-0.580028	0.389938	1.61825
731	0.654867	4770.99	u*_sk/ws	tau_sk	u*_sk/ws	7.38339e-06	0.0204566	581.847	0.697727	0.642091	0.798748		731	0.64929	4897.94	tau	Cf	u*_sk/ws	1.24602e-11	4962.47	27.3134	0.389938	-0.580028	1.61825
732	0.654867	4770.99	tau_sk	u*_sk/ws	u*_sk/ws	7.38339e-06	0.0204566	581.847	0.642091	0.697727	0.798748		732	0.64929	4897.94	u*_sk/ws	tau	Cf	1.24602e-11	4962.47	27.3134	1.61825	0.389938	-0.580028
733	0.653804	4902.78	Rep (u*_sk D)	S	tau_sk	0.487767	1.49023	0.589709	-1.71908	0.400907	1.15472		733	0.653536	4898.31	Rep (u*_sk D)	S	tau_sk	1.78692	0.700666	0.463061	-1.77824	0.423992	1.12378
734	0.653804	4902.78	S	Rep (u*_sk D)	tau_sk	0.487767	1.49023	0.589709	0.400907	-1.71908	1.15472		734	0.653536	4898.31	S	Rep (u*_sk D)	tau_sk	1.78692	0.700666	0.463061	0.423992	-1.77824	1.12378
735	0.653804	4902.78	Rep (u*_sk D)	tau_sk	S	0.487767	1.49023	0.589709	-1.71908	1.15472	0.400907		735	0.653536	4898.31	Rep (u*_sk D)	tau_sk	S	1.78692	0.700666	0.463061	-1.77824	1.12378	0.423992
736	0.653804	4902.78	tau_sk	Rep (u*_sk D)	S	0.487767	1.49023	0.589709	1.15472	-1.71908	0.400907		736	0.653536	4898.31	tau_sk	Rep (u*_sk D)	S	1.78692	0.700666	0.463061	1.12378	-1.77824	0.423992
737	0.653804	4902.78	S	tau_sk	Rep (u*_sk D)	0.487767	1.49023	0.589709	0.400907	1.15472	-1.71908		737	0.653536	4898.31	S	tau_sk	Rep (u*_sk D)	1.78692	0.700666	0.463061	0.423992	1.12378	-1.77824
738	0.653804	4902.78	tau_sk	S	Rep (u*_sk D)	0.487767	1.49023	0.589709	1.15472	0.400907	-1.71908		738	0.653536	4898.31	tau_sk	S	Rep (u*_sk D)	1.78692	0.700666	0.463061	1.12378	0.423992	-1.77824
739	0.651677	4961.9	Rep	S	tau_sk	1.30565	0.369358	2.19154	-1.36395	0.661205	0.432296		739	0.647176	4938.65	h/Kc	Rep (u*_sk D)	u*_sk/ws	0.00612541	2.24529	0.000659577	0.110783	0.53315	2.10967
740	0.651677	4961.9	S	Rep	tau_sk	1.30565	0.369358	2.19154	0.661205	-1.36395	0.432296		740	0.647176	4938.65	Rep (u*_sk D)	h/Kc	u*_sk/ws	0.00612541	2.24529	0.000659577	0.53315	0.110783	2.10967
741	0.651677	4961.9	Rep	tau_sk	S	1.30565	0.369358	2.19154	-1.36395	0.432296	0.661205		741	0.647176	4938.65	h/Kc	u*_sk/ws	Rep (u*_sk D)	0.00612541	2.24529	0.000659577	0.110783	2.10967	0.53315
742	0.651677	4961.9	tau_sk	Rep	S	1.30565	0.369358	2.19154	0.432296	-1.36395	0.661205		742	0.647176	4938.65	Rep (u*_sk D)	u*_sk/ws	h/Kc	0.00612541	2.24529	0.000659577	0.53315	2.10967	0.110783
743	0.651677	4961.9	S	tau_sk	Rep	1.30565	0.369358	2.19154	0.661205	0.432296	-1.36395		743	0.647176	4938.65	u*_sk/ws	Rep (u*_sk D)	h/Kc	0.00612541	2.24529	0.000659577	2.10967	0.53315	0.110783
744	0.651677	4961.9	tau_sk	S	Rep	1.30565	0.369358	2.19154	0.432296	0.661205	-1.36395		744	0.647176	4938.65	u*_sk/ws	h/Kc	Rep (u*_sk D)	0.00612541	2.24529	0.000659577	2.10967	0.110783	0.53315
745	0.650176	4948.89	Rep	h/Kc	u*_sk/ws	10.0537	3.68072	2.27715e-06	-0.394145	0.0267609	1.60302		745	0.647176	4938.65	Rep (u*_sk D)	Cf	u*_sk/ws	107.271	0.000112965	0.000183342	0.533167	-0.332379	2.10964
746	0.650176	4948.89	h/Kc	u*_sk/ws	Rep	10.0537	3.68072	2.27715e-06	0.0267609	1.60302	-0.394145		746	0.647176	4938.65	Cf	Rep (u*_sk D)	u*_sk/ws	107.271	0.000112965	0.000183342	-0.332379	0.533167	2.10964
747	0.650176	4948.89	Rep	u*_sk/ws	h/Kc	10.0537	3.68072	2.27715e-06	-0.394145	1.60302	0.0267609		747	0.647176	4938.65	Rep (u*_sk D)	u*_sk/ws	Cf	107.271	0.000112965	0.000183342	0.533167	2.10964	-0.332379
748	0.650176	4948.89	u*_sk/ws	Rep	h/Kc	10.0537	3.68072	2.27715e-06	1.60302	-0.394145	0.0267609		748	0.647176	4938.65	Cf	u*_sk/ws	Rep (u*_sk D)	107.271	0.000112965	0.000183342	-0.332379	2.10964	0.533167
749	0.650176	4948.89	h/Kc	Rep	u*_sk/ws	10.0537	3.68072	2.27715e-06	0.0267609	-0.394145	1.60302		749	0.647176	4938.65	u*_sk/ws	Rep (u*_sk D)	Cf	107.271	0.000112965	0.000183342	2.10964	0.533167	-0.332379
750	0.650176	4948.89	u*_sk/ws	h/Kc	Rep	10.0537	3.68072	2.27715e-06	1.60302	0.0267609	-0.394145		750	0.647176	4938.65	u*_sk/ws	Cf	Rep (u*_sk D)	107.271	0.000112965	0.000183342	2.10964	-0.332379	0.533167
751	0.650176	4948.89	Cf	u*_sk/ws	Rep	193.505	0.000246459	0.00125802	-0.0802624	1.60303	-0.394162		751	0.650078	4947.47	h/Kc	Rep	u*_sk/ws	0.169978	47.3616	1.02629e-05	0.0238771	-0.377587	1.61595
752	0.650176	4948.89	u*_sk/ws	Cf	Rep	193.505	0.000246459	0.00125802	1.60303	-0.0802624	-0.394162		752	0.650078	4947.47	Rep	h/Kc	u*_sk/ws	0.169978	47.3616	1.02629e-05	-0.377587	0.0238771	1.61595
753	0.650176	4948.89	Rep	Cf	u*_sk/ws	193.505	0.000246459	0.00125802	-0.394162	-0.0802624	1.60303		753	0.650078	4947.47	h/Kc	u*_sk/ws	Rep	0.169978	47.3616	1.02629e-05	0.0238771	1.61595	-0.377587
754	0.650176	4948.89	Cf	Rep	u*_sk/ws	193.505	0.000246459	0.00125802	-0.0802624	-0.394162	1.60303		754	0.650078	4947.47	u*_sk/ws	h/Kc	Rep	0.169978	47.3616	1.02629e-05	1.61595	0.0238771	-0.377587
755	0.650176	4948.89	Rep	u*_sk/ws	Cf	193.505	0.000246459	0.00125802	-0.394162	1.60303	-0.0802624		755	0.650078	4947.47	Rep	u*_sk/ws	h/Kc	0.169978	47.3616	1.02629e-05	-0.377587	1.61595	0.0238771
756	0.650176	4948.89	u*_sk/ws	Rep	Cf	193.505	0.000246459	0.00125802	1.60303	-0.394162	-0.0802624		756	0.650078	4947.47	u*_sk/ws	Rep	h/Kc	0.169978	47.3616	1.02629e-05	1.61595	-0.377587	0.0238771
757	0.649644	4953.8	Rep (u*D)	Rep	u*_sk/ws	1.43184e-05	5003.7	0.00126888	0.0676103	-0.484447	1.59575		757	0.649554	4952.49	Rep (u*D)	u*_sk/ws	Rep	0.0135533	0.455923	0.0138756	0.0768977	1.61332	-0.46604
758	0.649644	4953.8	Rep	Rep (u*D)	u*_sk/ws	1.43184e-05	5003.7	0.00126888	-0.484447	0.0676103	1.59575		758	0.649554	4952.49	u*_sk/ws	Rep (u*D)	Rep	0.0135533	0.455923	0.0138756	1.61332	0.0768977	-0.46604
759	0.649644	4953.8	Rep (u*D)	u*_sk/ws	Rep	1.43184e-05	5003.7	0.00126888	0.0676103	1.59575	-0.484447		759	0.649554	4952.49	Rep	u*_sk/ws	Rep (u*D)	0.0135533	0.455923	0.0138756	-0.46604	1.61332	0.0768977
760	0.649644	4953.8	u*_sk/ws	Rep (u*D)	Rep	1.43184e-05	5003.7	0.00126888	1.59575	0.0676103	-0.484447		760	0.649554	4952.49	u*_sk/ws	Rep	Rep (u*D)	0.0135533	0.455923	0.0138756	1.61332	-0.46604	0.0768977
761	0.649644	4953.8	Rep	u*_sk/ws	Rep (u*D)	1.43184e-05	5003.7	0.00126888	-0.484447	1.59575	0.0676103		761	0.649554	4952.49	Rep (u*D)	Rep	u*_sk/ws	0.0135533	0.455923	0.0138756	0.0768977	-0.46604	1.61332
762	0.649644	4953.8	u*_sk/ws	Rep	Rep (u*D)	1.43184e-05	5003.7	0.00126888	1.59575	-0.484447	0.0676103		762	0.649554	4952.49	Rep	Rep (u*D)	u*_sk/ws	0.0135533	0.455923	0.0138756	-0.46604	0.0768977	1.61332
763	0.649543	4955.66	Rep	Rep	u*_sk/ws	1.3958	0.00208474	0.0355904	-1.64224	1.18852	1.57956		763	0.649454	4954.35	Rep	u*_sk/ws	Rep	874631469148279	5.5118e-52	2.06105e+32	-7.38367	1.59495	6.95279
764	0.649543	4955.66	Rep	u*_sk/ws	Rep	1.3958	0.00208474	0.0355904	-1.64224	1.57956	1.18852		764	0.649454	4954.35	u*_sk/ws	Rep	Rep	874631469148279	5.5118e-52	2.06105e+32	1.59495	-7.38367	6.95279
765	0.649543	4955.66	u*_sk/ws	Rep	Rep	1.3958	0.00208474	0.0355904	1.57956	-1.64224	1.18852		765	0.649454	4954.35	Rep	Rep	u*_sk/ws	874631469148279	5.5118e-52	2.06105e+32	-7.38367	6.95279	1.59495
766	0.649543	4955.66	Rep	u*_sk/ws	u*_sk/ws	0.0809999	94.2276	1.35688e-05	-0.453718	2.26773	-0.688166		766	0.649454	4954.35	Rep	u*_sk/ws	u*_sk/ws	0.0622987	464.857	3.43094e-06	-0.430884	2.61081	-1.01586
767	0.649543	4955.66	u*_sk/ws	Rep	u*_sk/ws	0.0809999	94.2276	1.35688e-05	2.26773	-0.453718	-0.688166		767	0.649454	4954.35	u*_sk/ws	Rep	u*_sk/ws	0.0622987	464.857	3.43094e-06	2.61081	-0.430884	-1.01586
768	0.649543	4955.66	u*_sk/ws	u*_sk/ws	Rep	0.0809999	94.2276	1.35688e-05	2.26773	-0.688166	-0.453718		768	0.649454	4954.35	u*_sk/ws	u*_sk/ws	Rep	0.0622987	464.857	3.43094e-06	2.61081	-1.01586	-0.430884
769	0.649423	4899.87	Cf	u*_sk/ws	tau	3.1327e-10	0.0364042	161161	-0.567883	1.62419	0.358113		769	0.642769	4982.8	did50	Rep (u*D)	S	1.87725	0.669748	6.91835	-0.534801	-2.07465	0.611013
770	0.649423	4899.87	u*_sk/ws	Cf	tau	3.1327e-10	0.0364042	161161	1.62419	-0.567883	0.358113		770	0.642769	4982.8	Rep (u*D)	did50	S	1.87725	0.669748	6.91835	-2.07465	-0.534801	0.611013
771	0.649423	4899.87	Cf	tau	u*_sk/ws	3.1327e-10	0.0364042	161161	-0.567883	0.358113	1.62419		771	0.642769	4982.8	did50	S	Rep (u*D)	1.87725	0.669748	6.91835	-0.534801	0.611013	-2.07465
772	0.649423	4899.87	tau	Cf	u*_sk/ws	3.1327e-10	0.0364042	161161	0.358113	-0.567883	1.62419		772	0.642769	4982.8	S	did50	Rep (u*D)	1.87725	0.669748	6.91835	0.611013	-0.534801	-2.07465
773	0.649423	4899.87	u*_sk/ws	tau	Cf	3.1327e-10	0.0364042	161161	1.62419	0.358113	-0.567883		773	0.642769	4982.8	Rep (u*D)	S	did50	1.87725	0.669748	6.91835	-2.07465	0.611013	-0.534801
774	0.649423	4899.87	tau	u*_sk/ws	Cf	3.1327e-10	0.0364042	161161	0.358113	1.62419	-0.567883		774	0.642769	4982.8	S	Rep (u*D)	did50	1.87725	0.669748	6.91835	0.611013	-2.07465	-0.534801
775	0.649423	4899.87	u*_sk/ws	h/Kc	tau	0.019265	1.22882	0.000858924	1.62422	0.18928	0.358078		775	0.643672	4987.83	Rep (u*D)	S	tau	5.01078	0.506335	0.599764	-2.0989	0.432517	0.391423
776	0.649423	4899.87	h/Kc	tau	u*_sk/ws	0.019265	1.22882	0.000858924	0.18928	0.358078	1.62422		776	0.643672	4987.83	S	Rep (u*D)	tau	5.01078	0.506335	0.599764	0.432517	-2.0989	0.391423
777	0.649423	4899.87	tau	h/Kc	u*_sk/ws	0.019265	1.22882	0.000858924	0.358078	0.18928	1.62422		777	0.643672	4987.83	S	tau	Rep (u*D)	5.01078	0.506335	0.599764	0.432517	0.391423	-2.0989
778	0.649423	4899.87	u*_sk/ws	tau	h/Kc	0.019265	1.22882	0.000858924	1.62422	0.358078	0.18928		778	0.643672	4987.83	tau	S	Rep (u*D)	5.01078	0.506335	0.599764	0.391423	0.432517	-2.0989
779	0.649423	4899.87	tau	u*_sk/ws	h/Kc	0.019265	1.22882	0.000858924	0.358078	1.62422	0.18928		779	0.643672	4987.83	Rep (u*D)	tau	S	5.01078	0.506335	0.599764	-2.0989	0.391423	0.432517
780	0.649423	4899.87	h/Kc	u*_sk/ws	tau	0.019265	1.22882	0.000858924	0.18928	1.62422	0.358078		780	0.643672	4987.83	tau	Rep (u*D)	S	5.01078	0.506335	0.599764	0.391423	-2.0989	0.432517
781	0.647547	4932.33	Rep (u*D)	S	tau	16.4348	0.239812	1.00211	-2.16118	0.517296	0.392349		781	0.642853	5012.66	h/Kc	did50	Fr	6.10308e-08	776.049	17.2597	0.344682	-2.18058	1.6107
782	0.647547	4932.33	S	Rep (u*D)	tau	16.4348	0.239812	1.00211	0.517296	-2.16118	0.392349		782	0.642853	5012.66	h/Kc	Fr	did50	6.10308e-08	776.049	17.2597	0.344682	1.6107	-2.18058
783	0.647547	4932.33	Rep (u*D)	tau	S	16.4348	0.239812	1.00211	-2.16118	0.392349	0.517296		783	0.642853	5012.66	Fr	did50	h/Kc	6.10308e-08	776.049	17.2597	1.6107	-2.18058	0.344682
784	0.647547	4932.33	tau	Rep (u*D)	S	16.4348	0.239812	1.00211	0.392349	-2.16118	0.517296		784	0.642853	5012.66	did50	h/Kc	Fr	6.10308e-08	776.049	17.2597	-2.18058	0.344682	1.6107
785	0.647547	4932.33	S	tau	Rep (u*D)	16.4348	0.239812	1.00211	0.517296	0.392349	-2.16118		785	0.642853	5012.66	Fr	h/Kc	did50	6.10308e-08	776.049	17.2597	1.6107	0.344682	-2.18058
786	0.647547	4932.33	tau	S	Rep (u*D)	16.4348	0.239812	1.00211	0.392349	0.517296	-2.16118		786	0.642853	5012.66	did50	Fr	h/Kc	6.10308e-08	776.049	17.2597	-2.18058	1.6107	0.344682
787	0.647308	4940.5	Rep (u*_sk D)	Cf	u*_sk/ws	12272.8	1.43922e-07	0.0013736	0.483034	-0.336469	2.07855		787	0.642853	5012.66	did50	h/Kc	S	0.263061	0.239589	0.392024	-2.18059	0.613136	0.805354
788	0.647308	4940.5	Cf	Rep (u*_sk D)	u*_sk/ws	12272.8	1.43922e-07	0.0013736	-0.336469	0.483034	2.07855		788	0.642853	5012.66	h/Kc	did50	S	0.263061	0.239589	0.392024	0.613136	-2.18059	0.805354
789	0.647308	4940.5	Rep (u*_sk D)	u*_sk/ws	Cf	12272.8	1.43922e-07	0.0013736	0.483034	2.07855	-0.336469		789	0.642853	5012.66	did50	S	h/Kc	0.263061	0.239589	0.392024	-2.18059	0.805354	0.613136
790	0.647308	4940.5	u*_sk/ws	Rep (u*_sk D)	Cf	12272.8	1.43922e-07	0.0013736	2.07855	0.483034	-0.336469		790	0.642853	5012.66	S	did50	h/Kc	0.263061	0.239589	0.392024	0.805354	-2.18059	0.613136
791	0.647308	4940.5	Cf	u*_sk/ws	Rep (u*_sk D)	12272.8	1.43922e-07	0.0013736	-0.336469	2.07855	0.483034		791	0.642853	5012.66	h/Kc	S	did50	0.263061	0.239589	0.392024	0.613136	0.805354	-2.18059
792	0.647308	4940.5	u*_sk/ws	Cf	Rep (u*_sk D)	12272.8	1.43922e-07	0.0013736	2.07855	-0.336469	0.483034		792	0.642853	5012.66	S	h/Kc	did50	0.263061	0.239589	0.392024	0.805354	0.613136	-2.18059
793	0.647308	4940.5	h/Kc	Rep (u*_sk D)	u*_sk/ws	0.0149478	0.632544	0.00106604	0.112152	0.48302	2.07854		793	0.642852	5012.66	did50	Fr	Cf	0.00025106	0.0217115	1.8846	-2.1806	1.6107	-1.03406
794	0.647308	4940.5	Rep (u*_sk D)	h/Kc	u*_sk/ws	0.0149478	0.632544	0.00106604	0.48302	0.112152	2.07854		794	0.642852	5012.66	Fr	did50	Cf	0.00025106	0.0217115	1.8846	1.6107	-2.1806	-1.03406
795	0.647308	4940.5	h/Kc	u*_sk/ws	Rep (u*_sk D)	0.0149478	0.632544	0.00106604	0.112152	2.07854	0.48302		795	0.642852	5012.66	did50	Cf	Fr	0.00025106	0.0217115	1.8846	-2.1806	-1.03406	1.6107
796	0.647308	4940.5	u*_sk/ws	h/Kc	Rep (u*_sk D)	0.0149478	0.632544	0.00106604	2.07854	0.112152	0.48302		796	0.642852	5012.66	Cf	did50	Fr	0.00025106	0.0217115	1.8846	-1.03406	-2.1806	1.6107
797	0.647308	4940.5	Rep (u*_sk D)	u*_sk/ws	h/Kc	0.0149478	0.632544	0.00106604	0.48302	2.07854	0.112152		797	0.642852	5012.66	Fr	Cf	did50	0.00025106	0.0217115	1.8846	1.6107	-1.03406	-2.1806
798	0.647308	4940.5	u*_sk/ws	Rep (u*_sk D)	h/Kc	0.0149478	0.632544	0.00106604	2.07854	0.48302	0.112152		798	0.642852	5012.66	Cf	Fr	did50	0.00025106	0.0217115	1.8846	-1.03406	1.6107	-2.1806
799	0.64362	5060.6	Rep (u*_sk D)	Rep (u*D)	tau	855.777	2.56285e-06	6.42221	2.17931	-3.64965	0.874216		799	0.642852	5012.66	Fr	did50	S	0.000676373	10752.8	1.41238e-06	3.67886	-2.18057	-1.03408
800	0.64362	5060.6	Rep (u*D)	Rep (u*_sk D)	tau	855.777	2.56285e-06	6.42221	-3.64965	2.17931	0.874216		800	0.642852	5012.66	did50	Fr	S	0.000676373	10752.8	1.41238e-06	-2.18057	3.67886	-1.03408
801	0.64362	5060.6	Rep (u*_sk D)	tau	Rep (u*D)	855.777	2.56285e-06	6.42221	2.17931	0.874216	-3.64965		801	0.642852	5012.66	did50	S	Fr	0.000676373	10752.8	1.41238e-06	-2.18057	-1.03408	3.67886
802	0.64362	5060.6	tau	Rep (u*_sk D)	Rep (u*D)	855.777	2.56285e-06	6.42221	0.874216	2.17931	-3.64965		802	0.642852	5012.66	S	did50	Fr	0.000676373	10752.8	1.41238e-06	-1.03408	-2.18057	3.67886
803	0.64362	5060.6	Rep (u*D)	tau	Rep (u*_sk D)	855.777	2.56285e-06	6.42221	-3.64965	0.874216	2.17931		803	0.642852	5012.66	Fr	S	did50	0.000676373	10752.8	1.41238e-06	3.67886	-1.03408	-2.18057
804	0.64362	5060.6	tau	Rep (u*D)	Rep (u*_sk D)	855.777	2.56285e-06	6.42221	0.874216	-3.64965	2.17931		804	0.642852	5012.66	S	Fr	did50	0.000676373	10752.8	1.41238e-06	-1.03408	3.67886	-2.18057
805	0.64292	5013.63	did50	Fr	h/Kc	3.09481e-07	177.676	15.4364	-2.16022	1.61242	0.338136		805	0.642612	5017.79	Cf	S	did50	10.2595	6.05342e-05	0.0209249	-1.84267	0.83174	-2.17837
806	0.64292	5013.63	Fr	did50	h/Kc	3.09481e-07	177.676	15.4364	1.61242	-2.16022	0.338136		806	0.642612	5017.79	S	Cf	did50	10.2595	6.05342e-05	0.0209249	0.83174	-1.84267	-2.17837
807	0.64292	5013.63	did50	h/Kc	Fr	3.09481e-07	177.676	15.4364	-2.16022	0.338136	1.61242		807	0.642612	5017.79	did50	Cf	S	10.2595	6.05342e-05	0.0209249	-2.17837	-1.84267	0.83174
808	0.64292	5013.63	h/Kc	did50	Fr	3.09481e-07	177.676	15.4364	0.338136	-2.16022	1.61242		808	0.642612	5017.79	Cf	did50	S	10.2595	6.05342e-05	0.0209249	-1.84267	-2.17837	0.83174
809	0.64292	5013.63	Fr	h/Kc	did50	3.09481e-07	177.676	15.4364	1.61242	0.338136	-2.16022		809	0.642612	5017.79	did50	S	Cf	10.2595	6.05342e-05	0.0209249	-2.17837	0.83174	-1.84267
810	0.64292	5013.63	h/Kc	Fr	did50	3.09481e-07	177.676	15.4364	0.338136	1.61242	-2.16022		810	0.642612	5017.79	S	did50	Cf	10.2595	6.05342e-05	0.0209249	0.83174	-2.17837	-1.84267
811	0.64292	5013.63	did50	h/Kc	S	0.951431	0.138771	0.195042	-2.16024	0.606877	0.806228		811	0.640034	5055.49	Rep	S	tau	0.185049	3.9199	0.137799	-1.40858	0.472909	0.586582
812	0.64292	5013.63	h/Kc	did50	S	0.951431	0.138771	0.195042	0.606877	-2.16024	0.806228		812	0.640034	5055.49	Rep	tau	S	0.185049	3.9199	0.137799	-1.40858	0.586582	0.472909
813	0.64292	5013.63	did50	S	h/Kc	0.951431	0.138771	0.195042	-2.16024	0.806228	0.606877		813	0.640034	5055.49	S	Rep	tau	0.185049	3.9199	0.137799	0.472909	-1.40858	0.586582
814	0.64292	5013.63	S	did50	h/Kc	0.951431	0.138771	0.195042	0.806228	-2.16024	0.606877		814	0.640034	5055.49	tau	Rep	S	0.185049	3.9199	0.137799	0.586582	-1.40858	0.472909
815	0.64292	5013.63	h/Kc	S	did50	0.951431	0.138771	0.195042	0.606877	0.806228	-2.16024		815	0.640034	5055.49	S	tau	Rep	0.185049	3.9199	0.137799	0.472909	0.586582	-1.40858
816	0.64292	5013.63	S	h/Kc	did50	0.951431	0.138771	0.195042	0.806228	0.606877	-2.16024		816	0.640034	5055.49	tau	S	Rep	0.185049	3.9199	0.137799	0.586582	0.472909	-1.40858
817	0.64292	5013.64	did50	Cf	S	9.17633	0.000146663	0.00861492	-2.16017	-1.82062	0.806224		817	0.641608	5061.97	h/Kc	Rep (u*D)	u*_sk/ws	2.15848e-05	0.00306694	1246.37	0.0751978	-0.324735	1.67629
818	0.64292	5013.64	Cf	did50	S	9.17633	0.000146663	0.00861492	-1.82062	-2.16017	0.806224		818	0.641608	5061.97	Rep (u*D)	h/Kc	u*_sk/ws	2.15848e-05	0.00306694	1246.37	-0.324735	0.0751978	1.67629
819	0.64292	5013.64	did50	S	Cf	9.17633	0.000146663	0.00861492	-2.16017	0.806224	-1.82062		819	0.641608	5061.97	h/Kc	u*_sk/ws	Rep (u*D)	2.15848e-05	0.00306694	1246.37	0.0751978	1.67629	-0.324735
820	0.64292	5013.64	S	did50	Cf	9.17633	0.000146663	0.00861492	0.806224	-2.16017	-1.82062		820	0.641608	5061.97	u*_sk/ws	h/Kc	Rep (u*D)	2.15848e-05	0.00306694	1246.37	1.67629	0.0751978	-0.324735
821	0.64292	5013.64	Cf	S	did50	9.17633	0.000146663	0.00861492	-1.82062	0.806224	-2.16017		821	0.641608	5061.97	Rep (u*D)	u*_sk/ws	h/Kc	2.15848e-05	0.00306694	1246.37	-0.324735	1.67629	0.0751978
822	0.64292	5013.64	S	Cf	did50	9.17633	0.000146663	0.00861492	0.806224	-1.82062	-2.16017		822	0.641608	5061.97	u*_sk/ws	Rep (u*D)	h/Kc	2.15848e-05	0.00306694	1246.37	1.67629	-0.324735	0.0751978
823	0.64292	5013.64	did50	Fr	Cf	2.90821e-05	0.11623	3.43029	-2.16018	1.61243	-1.01437		823	0.641608	5061.97	Rep (u*D)	Cf	u*_sk/ws	3.40542	0.0256796	0.00036316	-0.32474	-0.225582	1.67629
824	0.64292	5013.64	Fr	did50	Cf	2.90821e-05	0.11623	3.43029	1.61243	-2.16018	-1.01437		824	0.641608	5061.97	Cf	Rep (u*D)	u*_sk/ws	3.40542	0.0256796	0.00036316	-0.225582	-0.32474	1.67629
825	0.64292	5013.64	did50	Cf	Fr	2.90821e-05	0.11623	3.43029	-2.16018	-1.01437	1.61243		825	0.641608	5061.97	Rep (u*D)	u*_sk/ws	Cf	3.40542	0.0256796	0.00036316	-0.32474	1.67629	-0.225582
826	0.64292	5013.64	Cf	did50	Fr	2.90821e-05	0.11623	3.43029	-1.01437	-2.16018	1.61243		826	0.641608	5061.97	u*_sk/ws	Rep (u*D)	Cf	3.40542	0.0256796	0.00036316	1.67629	-0.32474	-0.225582
827	0.64292	5013.64	Fr	Cf	did50	2.90821e-05	0.11623	3.43029	1.61243	-1.01437	-2.16018		827	0.641608	5061.97	Cf	u*_sk/ws	Rep (u*D)	3.40542	0.0256796	0.00036316	-0.225582	1.67629	-0.32474
828	0.64292	5013.64	Cf	Fr	did50	2.90821e-05	0.11623	3.43029	-1.01437	1.61243	-2.16018		828	0.641608	5061.97	u*_sk/ws	Cf	Rep (u*D)	3.40542	0.0256796	0.00036316	1.67629	-0.225582	-0.32474
829	0.64174	5125.25	h/D50	Rep (u*_sk D)	tau_sk	5.48658e-06	1.32431e-11	2861943865325868	-0.324973	-1.54565	1.27522		829	0.638326	5067.43	Rep (u*D)	u*_sk/ws	tau	1890.66	3.89406e-05	0.00441475	-0.746962	1.40865	0.213478
830	0.64174	5125.25	Rep (u*_sk D)	h/D50	tau_sk	5.48658e-06	1.32431e-11	2861943865325868	-1.54565	-0.324973	1.27522		830	0.638326	5067.43	u*_sk/ws	Rep (u*D)	tau	1890.66	3.89406e-05	0.00441475	1.40865	-0.746962	0.213478
831	0.64174	5125.25	h/D50	tau_sk	Rep (u*_sk D)	5.48658e-06	1.32431e-11	2861943865325868	-0.324973	1.27522	-1.54565		831	0.638326	5067.43	Rep (u*D)	tau	u*_sk/ws	1890.66	3.89406e-05	0.00441475	-0.746962	0.213478	1.40865
832	0.64174	5125.25	tau_sk	h/D50	Rep (u*_sk D)	5.48658e-06	1.32431e-11	2861943865325868	1.27522	-0.324973	-1.54565		832	0.638326	5067.43	tau	Rep (u*D)	u*_sk/ws	1890.66	3.89406e-05	0.00441475	0.213478	-0.746962	1.40865
833	0.64174	5125.25	Rep (u*_sk D)	tau_sk	h/D50	5.48658e-06	1.32431e-11	2861943865325868	-1.54565	1.27522	-0.324973		833	0.638326	5067.43	u*_sk/ws	tau	Rep (u*D)	1890.66	3.89406e-05	0.00441475	1.40865	0.213478	-0.746962
834	0.64174	5125.25	tau_sk	Rep (u*_sk D)	h/D50	5.48658e-06	1.32431e-11	2861943865325868	1.27522	-1.54565	-0.324973		834	0.638326	5067.43	tau	u*_sk/ws	Rep (u*D)	1890.66	3.89406e-05	0.00441475	0.213478	1.40865	-0.746962
835	0.641697	5063.27	Rep (u*D)	Cf	u*_sk/ws	78.188	0.000181207	0.00231808	-0.353091	-0.234295	1.65762		835	0.642671	5071.3	Rep (u*_sk D)	Rep (u*D)	tau	1.12957	0.00381829	3.20288	2.10278	-3.58226	0.864418
836	0.641697	5063.27	Cf	Rep (u*D)	u*_sk/ws	78.188	0.000181207	0.00231808	-0.234295	-0.353091	1.65762		836	0.642671	5071.3	Rep (u*_sk D)	tau	Rep (u*D)	1.12957	0.00381829	3.20288	2.10278	0.864418	-3.58226
837	0.641697	5063.27	Rep (u*D)	u*_sk/ws	Cf	78.188	0.000181207	0.00231808	-0.353091	1.65762	-0.234295		837	0.642671	5071.3	Rep (u*D)	Rep (u*_sk D)	tau	1.12957	0.00381829	3.20288	-3.58226	2.10278	0.864418
838	0.641697	5063.27	u*_sk/ws	Rep (u*D)	Cf	78.188	0.000181207	0.00231808	1.65762	-0.353091	-0.234295		838	0.642671	5071.3	Rep (u*D)	tau	Rep (u*_sk D)	1.12957	0.00381829	3.20288	-3.58226	0.864418	2.10278
839	0.641697	5063.27	Cf	u*_sk/ws	Rep (u*D)	78.188	0.000181207	0.00231808	-0.234295	1.65762	-0.353091		839	0.642671	5071.3	tau	Rep (u*_sk D)	Rep (u*D)	1.12957	0.00381829	3.20288	0.864418	2.10278	-3.58226
840	0.641697	5063.27	u*_sk/ws	Cf	Rep (u*D)	78.188	0.000181207	0.00231808	1.65762	-0.234295	-0.353091		840	0.642671	5071.3	tau	Rep (u*D)	Rep (u*_sk D)	1.12957	0.00381829	3.20288	0.864418	-3.58226	2.10278
841	0.641697	5063.26	Rep (u*D)	h/Kc	u*_sk/ws	3.22549e-05	0.000784006	3500.89	-0.353068	0.0780914	1.65765		841	0.637978	5087.99	h/D50	Rep	tau	3.69894e-11	42.62	4.63653e+07	-0.419357	-1.3911	0.69371
842	0.641697	5063.26	h/Kc	Rep (u*D)	u*_sk/ws	3.22549e-05	0.000784006	3500.89	0.0780914	-0.353068	1.65765		842	0.637978	5087.99	Rep	h/D50	tau	3.69894e-11	42.62	4.63653e+07	-1.3911	-0.419357	0.69371
843	0.641697	5063.26	h/Kc	u*_sk/ws	Rep (u*D)	3.22549e-05	0.000784006	3500.89	0.0780914	1.65765	-0.353068		843	0.637978	5087.99	h/D50	tau	Rep	3.69894e-11	42.62	4.63653e+07	-0.419357	0.69371	-1.3911
844	0.641697	5063.26	u*_sk/ws	h/Kc	Rep (u*D)	3.22549e-05	0.000784006	3500.89	1.65765	0.0780914	-0.353068		844	0.637978	5087.99	tau	h/D50	Rep	3.69894e-11	42.62	4.63653e+07	0.69371	-0.419357	-1.3911
845	0.641697	5063.26	Rep (u*D)	u*_sk/ws	h/Kc	3.22549e-05	0.000784006	3500.89	-0.353068	1.65765	0.0780914		845	0.637978	5087.99	tau	Rep	h/D50	3.69894e-11	42.62	4.63653e+07	0.69371	-1.3911	-0.419357
846	0.641697	5063.26	u*_sk/ws	Rep (u*D)	h/Kc	3.22549e-05	0.000784006	3500.89	1.65765	-0.353068	0.0780914		846	0.637978	5087.99	Rep	tau	h/D50	3.69894e-11	42.62	4.63653e+07	-1.3911	0.69371	-0.419357
847	0.640075	5056.07	Rep	S	tau	0.270052	2.21257	0.177278	-1.40937	0.478512	0.573758		847	0.640016	5099.91	Rep (u*_sk D)	h/Kc	S	0.0147409	41.986	3.19871	-1.88079	0.322872	0.72801
848	0.640075	5056.07	S	Rep	tau	0.270052	2.21257	0.177278	0.478512	-1.40937	0.573758		848	0.640016	5099.91	h/Kc	Rep (u*_sk D)	S	0.0147409	41.986	3.19871	0.322872	-1.88079	0.72801
849	0.640075	5056.07	Rep	tau	S	0.270052	2.21257	0.177278	-1.40937	0.573758	0.478512		849	0.640016	5099.91	h/Kc	S	Rep (u*_sk D)	0.0147409	41.986	3.19871	0.322872	0.72801	-1.88079
850	0.640075	5056.07	tau	Rep	S	0.270052	2.21257	0.177278	0.573758	-1.40937	0.478512		850	0.640016	5099.91	S	h/Kc	Rep (u*_sk D)	0.0147409	41.986	3.19871	0.72801	0.322872	-1.88079
851	0.640075	5056.07	S	tau	Rep	0.270052	2.21257	0.177278	0.478512	0.573758	-1.40937		851	0.640016	5099.91	Rep (u*_sk D)	S	h/Kc	0.0147409	41.986	3.19871	-1.88079	0.72801	0.322872
852	0.640075	5056.07	tau	S	Rep	0.270052	2.21257	0.177278	0.573758	0.478512	-1.40937		852	0.640016	5099.91	S	Rep (u*_sk D)	h/Kc	0.0147409	41.986	3.19871	0.72801	-1.88079	0.322872
853	0.638573	5098.9	Rep (u*D)	Rep	S	0.037416	31.8604	2.40344	-1.20321	-0.684677	0.591121		853	0.641194	5117.05	h/D50	Rep (u*_sk D)	tau_sk	52.6768	8.56995e-06	468.512	-0.320476	-1.59753	1.23388
854	0.638573	5098.9	Rep	Rep (u*D)	S	0.037416	31.8604	2.40344	-0.684677	-1.20321	0.591121		854	0.641194	5117.05	Rep (u*_sk D)	h/D50	tau_sk	52.6768	8.56995e-06	468.512	-1.59753	-0.320476	1.23388
855	0.638573	5098.9	Rep (u*D)	S	Rep	0.037416	31.8604	2.40344	-1.20321	0.591121	-0.684677		855	0.641194	5117.05	h/D50	tau_sk	Rep (u*_sk D)	52.6768	8.56995e-06	468.512	-0.320476	1.23388	-1.59753
856	0.638573	5098.9	S	Rep (u*D)	Rep	0.037416	31.8604	2.40344	0.591121	-1.20321	-0.684677		856	0.641194	5117.05	tau_sk	h/D50	Rep (u*_sk D)	52.6768	8.56995e-06	468.512	1.23388	-0.320476	-1.59753
857	0.638573	5098.9	Rep	S	Rep (u*D)	0.037416	31.8604	2.40344	-0.684677	0.591121	-1.20321		857	0.641194	5117.05	Rep (u*_sk D)	tau_sk	h/D50	52.6768	8.56995e-06	468.512	-1.59753	1.23388	-0.320476
858	0.638573	5098.9	S	Rep	Rep (u*D)	0.037416	31.8604	2.40344	0.591121	-0.684677	-1.20321		858	0.641194	5117.05	tau_sk	Rep (u*_sk D)	h/D50	52.6768	8.56995e-06	468.512	1.23388	-1.59753	-0.320476
859	0.638537	5070.52	Rep (u*D)	u*_sk/ws	tau	188.264	0.000356488	0.0049016	-0.744935	1.41892	0.178783		859	0.636664	5121.5	Cf	u*_sk/ws	u*_sk/ws	2.86926e-12	5.83091e-21	4.41403e+26	-0.32713	17.9674	-16.1245
860	0.638537	5070.52	u*_sk/ws	Rep (u*D)	tau	188.264	0.000356488	0.0049016	1.41892	-0.744935	0.178783		860	0.636664	5121.5	u*_sk/ws	Cf	u*_sk/ws	2.86926e-12	5.83091e-21	4.41403e+26	17.9674	-0.32713	-16.1245
861	0.638537	5070.52	Rep (u*D)	tau	u*_sk/ws	188.264	0.000356488	0.0049016	-0.744935	0.178783	1.41892		861	0.636664	5121.5	u*_sk/ws	u*_sk/ws	Cf	2.86926e-12	5.83091e-21	4.41403e+26	17.9674	-16.1245	-0.32713
862	0.638537	5070.52	tau	Rep (u*D)	u*_sk/ws	188.264	0.000356488	0.0049016	0.178783	-0.744935	1.41892		862	0.636664	5121.5	u*_sk/ws	Cf	Cf	0.000813747	0.0118656	0.764787	1.84284	1.8346	-2.16174
863	0.638537	5070.52	u*_sk/ws	tau	Rep (u*D)	188.264	0.000356488	0.0049016	1.41892	0.178783	-0.744935		863	0.636664	5121.5	Cf	Cf	u*_sk/ws	0.000813747	0.0118656	0.764787	1.8346	-2.16174	1.84284
864	0.638537	5070.52	tau	u*_sk/ws	Rep (u*D)	188.264	0.000356488	0.0049016	0.178783	1.41892	-0.744935		864	0.636664	5121.5	Cf	u*_sk/ws	Cf	0.000813747	0.0118656	0.764787	1.8346	1.84284	-2.16174
865	0.63801	5088.44	h/D50	Rep	tau	5.01842e+09	6.35199e-17	245290	-0.425107	-1.39303	0.683426		865	0.636664	5121.5	u*_sk/ws	h/Kc	u*_sk/ws	0.027488	1.81592	0.000590747	0.566766	0.10905	1.27611
866	0.63801	5088.44	Rep	h/D50	tau	5.01842e+09	6.35199e-17	245290	-1.39303	-0.425107	0.683426		866	0.636664	5121.5	u*_sk/ws	u*_sk/ws	h/Kc	0.027488	1.81592	0.000590747	0.566766	1.27611	0.10905
867	0.63801	5088.44	h/D50	tau	Rep	5.01842e+09	6.35199e-17	245290	-0.425107	0.683426	-1.39303		867	0.636664	5121.5	h/Kc	u*_sk/ws	u*_sk/ws	0.027488	1.81592	0.000590747	0.10905	0.566766	1.27611
868	0.63801	5088.44	tau	h/D50	Rep	5.01842e+09	6.35199e-17	245290	0.683426	-0.425107	-1.39303		868	0.636664	5121.5	h/Kc	Cf	u*_sk/ws	0.125556	0.138826	0.0932408	0.424805	0.947292	1.84289
869	0.63801	5088.44	Rep	tau	h/D50	5.01842e+09	6.35199e-17	245290	-1.39303	0.683426	-0.425107		869	0.636664	5121.5	Cf	h/Kc	u*_sk/ws	0.125556	0.138826	0.0932408	0.947292	0.424805	1.84289
870	0.63801	5088.44	tau	Rep	h/D50	5.01842e+09	6.35199e-17	245290	0.683426	-1.39303	-0.425107		870	0.636664	5121.5	h/Kc	u*_sk/ws	Cf	0.125556	0.138826	0.0932408	0.424805	1.84289	0.947292
871	0.636693	5121.9	Cf	u*_sk/ws	u*_sk/ws	3.47335e-11	4.54694e-15	4.38855e+19	-0.339003	11.5202	-9.68249		871	0.636664	5121.5	u*_sk/ws	h/Kc	Cf	0.125556	0.138826	0.0932408	1.84289	0.424805	0.947292
872	0.636693	5121.9	u*_sk/ws	Cf	u*_sk/ws	3.47335e-11	4.54694e-15	4.38855e+19	11.5202	-0.339003	-9.68249		872	0.636664	5121.5	Cf	u*_sk/ws	h/Kc	0.125556	0.138826	0.0932408	0.947292	1.84289	0.424805
873	0.636693	5121.9	u*_sk/ws	u*_sk/ws	Cf	3.47335e-11	4.54694e-15	4.38855e+19	11.5202	-9.68249	-0.339003		873	0.636664	5121.5	u*_sk/ws	Cf	h/Kc	0.125556	0.138826	0.0932408	1.84289	0.947292	0.424805
874	0.636693	5121.9	Cf	Cf	u*_sk/ws	1.82327	4.42735e-06	0.858558	2.12682	-2.46583	1.83772		874	0.636664	5121.5	h/Kc	h/Kc	u*_sk/ws	62.2967	0.000432183	0.00109544	-2.10021	2.20923	1.84282
875	0.636693	5121.9	Cf	u*_sk/ws	Cf	1.82327	4.42735e-06	0.858558	2.12682	1.83772	-2.46583		875	0.636664	5121.5	h/Kc	u*_sk/ws	h/Kc	62.2967	0.000432183	0.00109544	-2.10021	1.84282	2.20923
876	0.636693	5121.9	u*_sk/ws	Cf	Cf	1.82327	4.42735e-06	0.858558	1.83772	2.12682	-2.46583		876	0.636664	5121.5	u*_sk/ws	h/Kc	h/Kc	62.2967	0.000432183	0.00109544	1.84282	-2.10021	2.20923
877	0.636693	5121.9	u*_sk/ws	h/Kc	u*_sk/ws	0.0322694	2.16979	0.000415635	0.397498	0.112995	1.44024		877	0.631881	5154.78	h/Kc	u*_sk/ws	tau	0.0846861	1.75967	0.000131946	0.265818	1.20741	0.57436
878	0.636693	5121.9	u*_sk/ws	u*_sk/ws	h/Kc	0.0322694	2.16979	0.000415635	0.397498	1.44024	0.112995		878	0.631881	5154.78	u*_sk/ws	h/Kc	tau	0.0846861	1.75967	0.000131946	1.20741	0.265818	0.57436
879	0.636693	5121.9	h/Kc	u*_sk/ws	u*_sk/ws	0.0322694	2.16979	0.000415635	0.112995	0.397498	1.44024		879	0.631881	5154.78	h/Kc	tau	u*_sk/ws	0.0846861	1.75967	0.000131946	0.265818	0.57436	1.20741
880	0.636693	5121.9	h/Kc	h/Kc	u*_sk/ws	204.943	0.000259269	0.000547681	-1.76217	1.87518	1.83771		880	0.631881	5154.78	tau	h/Kc	u*_sk/ws	0.0846861	1.75967	0.000131946	0.57436	0.265818	1.20741
881	0.636693	5121.9	h/Kc	u*_sk/ws	h/Kc	204.943	0.000259269	0.000547681	-1.76217	1.83771	1.87518		881	0.631881	5154.78	tau	u*_sk/ws	h/Kc	0.0846861	1.75967	0.000131946	0.57436	1.20741	0.265818
882	0.636693	5121.9	u*_sk/ws	h/Kc	h/Kc	204.943	0.000259269	0.000547681	1.83771	-1.76217	1.87518		882	0.631881	5154.78	u*_sk/ws	tau	h/Kc	0.0846861	1.75967	0.000131946	1.20741	0.57436	0.265818
883	0.636693	5121.9	h/Kc	Cf	u*_sk/ws	0.184113	0.0965834	0.0866662	0.425622	0.937842	1.83768		883	0.63424	5155.69	Rep (u*D)	Rep (u*D)	u*_sk/ws	5.84398e+07	0.000124165	2.791e-08	-2.80722	2.25236	1.60585
884	0.636693	5121.9	Cf	h/Kc	u*_sk/ws	0.184113	0.0965834	0.0866662	0.937842	0.425622	1.83768		884	0.63424	5155.69	Rep (u*D)	u*_sk/ws	Rep (u*D)	5.84398e+07	0.000124165	2.791e-08	-2.80722	1.60585	2.25236
885	0.636693	5121.9	h/Kc	u*_sk/ws	Cf	0.184113	0.0965834	0.0866662	0.425622	1.83768	0.937842		885	0.63424	5155.69	u*_sk/ws	Rep (u*D)	Rep (u*D)	5.84398e+07	0.000124165	2.791e-08	1.60585	-2.80722	2.25236
886	0.636693	5121.9	u*_sk/ws	h/Kc	Cf	0.184113	0.0965834	0.0866662	1.83768	0.425622	0.937842		886	0.630773	5194.8	Rep (u*D)	u*_sk/ws	u*_sk/ws	0.0021316	22.8589	0.00223437	-0.352935	-0.305472	2.08135
887	0.636693	5121.9	Cf	u*_sk/ws	h/Kc	0.184113	0.0965834	0.0866662	0.937842	1.83768	0.425622		887	0.630773	5194.8	u*_sk/ws	Rep (u*D)	u*_sk/ws	0.0021316	22.8589	0.00223437	-0.305472	-0.352935	2.08135
888	0.636693	5121.9	u*_sk/ws	Cf	h/Kc	0.184113	0.0965834	0.0866662	1.83768	0.937842	0.425622		888	0.630773	5194.8	u*_sk/ws	u*_sk/ws	Rep (u*D)	0.0021316	22.8589	0.00223437	-0.305472	2.08135	-0.352935
889	0.634297	5156.52	Rep (u*D)	Rep (u*D)	u*_sk/ws	1.53346e+08	0.000224279	6.44557e-09	-3.15927	2.57282	1.58675		889	0.63169	5209.44	Rep (u*D)	h/Kc	S	8.30897e+07	3.46003e-12	29809.2	-1.96739	0.0862217	0.651165
890	0.634297	5156.52	Rep (u*D)	u*_sk/ws	Rep (u*D)	1.53346e+08	0.000224279	6.44557e-09	-3.15927	1.58675	2.57282		890	0.63169	5209.44	S	h/Kc	Rep (u*D)	8.30897e+07	3.46003e-12	29809.2	0.651165	0.0862217	-1.96739
891	0.634297	5156.52	u*_sk/ws	Rep (u*D)	Rep (u*D)	1.53346e+08	0.000224279	6.44557e-09	1.58675	-3.15927	2.57282		891	0.63169	5209.44	Rep (u*D)	S	h/Kc	8.30897e+07	3.46003e-12	29809.2	-1.96739	0.651165	0.0862217
892	0.634297	5156.52	Rep (u*D)	u*_sk/ws	u*_sk/ws	0.00160529	19.4695	0.00709247	-0.58643	-0.766993	2.35373		892	0.63169	5209.44	S	Rep (u*D)	h/Kc	8.30897e+07	3.46003e-12	29809.2	0.651165	-1.96739	0.0862217
893	0.634297	5156.52	u*_sk/ws	Rep (u*D)	u*_sk/ws	0.00160529	19.4695	0.00709247	-0.766993	-0.58643	2.35373		893	0.63169	5209.44	h/Kc	Rep (u*D)	S	8.30897e+07	3.46003e-12	29809.2	0.0862217	-1.96739	0.651165
894	0.634297	5156.52	u*_sk/ws	u*_sk/ws	Rep (u*D)	0.00160529	19.4695	0.00709247	-0.766993	2.35373	-0.58643		894	0.63169	5209.44	h/Kc	S	Rep (u*D)	8.30897e+07	3.46003e-12	29809.2	0.0862217	0.651165	-1.96739
895	0.631868	5211.99	h/Kc	Rep (u*D)	S	2.60346e+06	1.43932e-08	229.075	0.0965327	-1.96349	0.656079		895	0.63169	5209.44	Fr	Rep (u*D)	Cf	5999.29	3.01355	0.000158621	1.30233	-1.9674	0.392505
896	0.631868	5211.99	Rep (u*D)	h/Kc	S	2.60346e+06	1.43932e-08	229.075	-1.96349	0.0965327	0.656079		896	0.63169	5209.44	Rep (u*D)	Fr	Cf	5999.29	3.01355	0.000158621	-1.9674	1.30233	0.392505
897	0.631868	5211.99	h/Kc	S	Rep (u*D)	2.60346e+06	1.43932e-08	229.075	0.0965327	0.656079	-1.96349		897	0.63169	5209.44	Fr	Cf	Rep (u*D)	5999.29	3.01355	0.000158621	1.30233	0.392505	-1.9674
898	0.631868	5211.99	S	h/Kc	Rep (u*D)	2.60346e+06	1.43932e-08	229.075	0.656079	0.0965327	-1.96349		898	0.63169	5209.44	Rep (u*D)	Cf	Fr	5999.29	3.01355	0.000158621	-1.9674	0.392505	1.30233
899	0.631868	5211.99	Rep (u*D)	S	h/Kc	2.60346e+06	1.43932e-08	229.075	-1.96349	0.656079	0.0965327		899	0.63169	5209.44	Cf	Rep (u*D)	Fr	5999.29	3.01355	0.000158621	0.392505	-1.9674	1.30233
900	0.631868	5211.99	S	Rep (u*D)	h/Kc	2.60346e+06	1.43932e-08	229.075	0.656079	-1.96349	0.0965327		900	0.63169	5209.44	Cf	Fr	Rep (u*D)	5999.29	3.01355	0.000158621	0.392505	1.30233	-1.9674
901	0.631868	5211.99	Rep (u*D)	Cf	S	2.00984e-08	21640.3	5793.25	-1.96348	-0.289593	0.656075		901	0.63169	5209.44	Fr	h/Kc	Rep (u*D)	10.3075	0.079823	0.661783	1.30234	-0.130829	-1.96735
902	0.631868	5211.99	Cf	Rep (u*D)	S	2.00984e-08	21640.3	5793.25	-0.289593	-1.96348	0.656075		902	0.63169	5209.44	h/Kc	Fr	Rep (u*D)	10.3075	0.079823	0.661783	-0.130829	1.30234	-1.96735
903	0.631868	5211.99	Rep (u*D)	S	Cf	2.00984e-08	21640.3	5793.25	-1.96348	0.656075	-0.289593		903	0.63169	5209.44	Fr	Rep (u*D)	h/Kc	10.3075	0.079823	0.661783	1.30234	-1.96735	-0.130829
904	0.631868	5211.99	S	Rep (u*D)	Cf	2.00984e-08	21640.3	5793.25	0.656075	-1.96348	-0.289593		904	0.63169	5209.44	Rep (u*D)	Fr	h/Kc	10.3075	0.079823	0.661783	-1.96735	1.30234	-0.130829
905	0.631868	5211.99	Cf	S	Rep (u*D)	2.00984e-08	21640.3	5793.25	-0.289593	0.656075	-1.96348		905	0.63169	5209.44	h/Kc	Rep (u*D)	Fr	10.3075	0.079823	0.661783	-0.130829	-1.96735	1.30234
906	0.631868	5211.99	S	Cf	Rep (u*D)	2.00984e-08	21640.3	5793.25	0.656075	-0.289593	-1.96348		906	0.63169	5209.44	Rep (u*D)	h/Kc	Fr	10.3075	0.079823	0.661783	-1.96735	-0.130829	1.30234
907	0.631868	5211.99	Fr	Rep (u*D)	S	22.7001	3.99009	0.0278229	0.579153	-1.9635	0.366501		907	0.631676	5209.48	Rep (u*D)	Cf	S	2.88637e-09	1.90155e+08	5.29287	-1.968	-0.258499	0.652576
908	0.631868	5211.99	Rep (u*D)	Fr	S	22.7001	3.99009	0.0278229	-1.9635	0.579153	0.366501		908	0.631676	5209.48	Cf	Rep (u*D)	S	2.88637e-09	1.90155e+08	5.29287	-0.258499	-1.968	0.652576
909	0.631868	5211.99	Fr	S	Rep (u*D)	22.7001	3.99009	0.0278229	0.579153	0.366501	-1.9635		909	0.631676	5209.48	Rep (u*D)	S	Cf	2.88637e-09	1.90155e+08	5.29287	-1.968	0.652576	-0.258499
910	0.631868	5211.99	S	Fr	Rep (u*D)	22.7001	3.99009	0.0278229	0.366501	0.579153	-1.9635		910	0.631676	5209.48	S	Rep (u*D)	Cf	2.88637e-09	1.90155e+08	5.29287	0.652576	-1.968	-0.258499
911	0.631868	5211.99	Rep (u*D)	S	Fr	22.7001	3.99009	0.0278229	-1.9635	0.366501	0.579153		911	0.631676	5209.48	Cf	S	Rep (u*D)	2.88637e-09	1.90155e+08	5.29287	-0.258499	0.652576	-1.968
912	0.631868	5211.99	S	Rep (u*D)	Fr	22.7001	3.99009	0.0278229	0.366501	-1.9635	0.579153		912	0.631676	5209.48	S	Cf	Rep (u*D)	2.88637e-09	1.90155e+08	5.29287	0.652576	-0.258499	-1.968
913	0.631868	5211.99	Fr	Rep (u*D)	Cf	547.979	2.41174	0.00190666	1.31214	-1.96351	0.366482		913	0.626904	5226.19	Rep (u*_sk D)	u*_sk/ws	tau	7.65764	8.07726e-05	0.0207037	0.552331	2.24743	-0.0670145
914	0.631868	5211.99	Rep (u*D)	Fr	Cf	547.979	2.41174	0.00190666	-1.96351	1.31214	0.366482		914	0.626904	5226.19	u*_sk/ws	Rep (u*_sk D)	tau	7.65764	8.07726e-05	0.0207037	2.24743	0.552331	-0.0670145
915	0.631868	5211.99	Fr	Cf	Rep (u*D)	547.979	2.41174	0.00190666	1.31214	0.366482	-1.96351		915	0.626904	5226.19	Rep (u*_sk D)	tau	u*_sk/ws	7.65764	8.07726e-05	0.0207037	0.552331	-0.0670145	2.24743
916	0.631868	5211.99	Cf	Fr	Rep (u*D)	547.979	2.41174	0.00190666	0.366482	1.31214	-1.96351		916	0.626904	5226.19	tau	Rep (u*_sk D)	u*_sk/ws	7.65764	8.07726e-05	0.0207037	-0.0670145	0.552331	2.24743
917	0.631868	5211.99	Rep (u*D)	Cf	Fr	547.979	2.41174	0.00190666	-1.96351	0.366482	1.31214		917	0.626904	5226.19	u*_sk/ws	tau	Rep (u*_sk D)	7.65764	8.07726e-05	0.0207037	2.24743	-0.0670145	0.552331
918	0.631868	5211.99	Cf	Rep (u*D)	Fr	547.979	2.41174	0.00190666	0.366482	-1.96351	1.31214		918	0.626904	5226.19	tau	u*_sk/ws	Rep (u*_sk D)	7.65764	8.07726e-05	0.0207037	-0.0670145	2.24743	0.552331
919	0.631868	5211.99	Fr	h/Kc	Rep (u*D)	5.04058	0.168251	0.629897	1.31217	-0.122165	-1.96347		919	0.629291	5232.28	Rep (u*D)	S	Rep	0.00410792	67.8736	3.72828	-0.910872	0.535337	-0.822727
920	0.631868	5211.99	h/Kc	Fr	Rep (u*D)	5.04058	0.168251	0.629897	-0.122165	1.31217	-1.96347		920	0.629291	5232.28	S	Rep (u*D)	Rep	0.00410792	67.8736	3.72828	0.535337	-0.910872	-0.822727
921	0.631868	5211.99	Fr	Rep (u*D)	h/Kc	5.04058	0.168251	0.629897	1.31217	-1.96347	-0.122165		921	0.629291	5232.28	Rep	S	Rep (u*D)	0.00410792	67.8736	3.72828	-0.822727	0.535337	-0.910872
922	0.631868	5211.99	h/Kc	Rep (u*D)	Fr	5.04058	0.168251	0.629897	-0.122165	-1.96347	1.31217		922	0.629291	5232.28	Rep (u*D)	Rep	S	0.00410792	67.8736	3.72828	-0.910872	-0.822727	0.535337
923	0.631868	5211.99	Rep (u*D)	h/Kc	Fr	5.04058	0.168251	0.629897	-1.96347	-0.122165	1.31217		923	0.629291	5232.28	Rep	Rep (u*D)	S	0.00410792	67.8736	3.72828	-0.822727	-0.910872	0.535337
924	0.631868	5211.99	Rep (u*D)	Fr	h/Kc	5.04058	0.168251	0.629897	-1.96347	1.31217	-0.122165		924	0.629291	5232.28	S	Rep	Rep (u*D)	0.00410792	67.8736	3.72828	0.535337	-0.822727	-0.910872
925	0.627107	5229.11	Rep (u*_sk D)	u*_sk/ws	tau	5.91847	0.000274924	0.00830812	0.531093	2.23861	-0.092856		925	0.625563	5237.2	Rep (u*_sk D)	u*_sk/ws	u*_sk/ws	1.58131	0.000748232	0.0113836	0.519473	0.91699	1.28873
926	0.627107	5229.11	Rep (u*_sk D)	tau	u*_sk/ws	5.91847	0.000274924	0.00830812	0.531093	-0.092856	2.23861		926	0.625563	5237.2	u*_sk/ws	Rep (u*_sk D)	u*_sk/ws	1.58131	0.000748232	0.0113836	0.91699	0.519473	1.28873
927	0.627107	5229.11	u*_sk/ws	Rep (u*_sk D)	tau	5.91847	0.000274924	0.00830812	2.23861	0.531093	-0.092856		927	0.625563	5237.2	u*_sk/ws	u*_sk/ws	Rep (u*_sk D)	1.58131	0.000748232	0.0113836	0.91699	1.28873	0.519473
928	0.627107	5229.11	tau	Rep (u*_sk D)	u*_sk/ws	5.91847	0.000274924	0.00830812	-0.092856	0.531093	2.23861		928	0.625563	5237.2	Rep (u*_sk D)	Rep (u*_sk D)	u*_sk/ws	0.009922	0.0842545	0.0161128	-0.190987	0.710412	2.20573
929	0.627107	5229.11	u*_sk/ws	tau	Rep (u*_sk D)	5.91847	0.000274924	0.00830812	2.23861	-0.092856	0.531093		929	0.625563	5237.2	Rep (u*_sk D)	u*_sk/ws	Rep (u*_sk D)	0.009922	0.0842545	0.0161128	-0.190987	2.20573	0.710412
930	0.627107	5229.11	tau	u*_sk/ws	Rep (u*_sk D)	5.91847	0.000274924	0.00830812	-0.092856	2.23861	0.531093		930	0.625563	5237.2	u*_sk/ws	Rep (u*_sk D)	Rep (u*_sk D)	0.009922	0.0842545	0.0161128	2.20573	-0.190987	0.710412
931	0.625652	5238.46	Rep (u*_sk D)	Rep (u*_sk D)	u*_sk/ws	0.0118787	0.0751286	0.0161186	-0.196583	0.687002	2.18036		931	0.621921	5294.65	Rep	Rep (u*_sk D)	S	2.98231	0.33532	7.38639	-0.987604	-1.03408	0.749812
932	0.625652	5238.46	Rep (u*_sk D)	u*_sk/ws	Rep (u*_sk D)	0.0118787	0.0751286	0.0161186	-0.196583	2.18036	0.687002		932	0.621921	5294.65	S	Rep (u*_sk D)	Rep	2.98231	0.33532	7.38639	0.749812	-1.03408	-0.987604
933	0.625652	5238.46	u*_sk/ws	Rep (u*_sk D)	Rep (u*_sk D)	0.0118787	0.0751286	0.0161186	2.18036	-0.196583	0.687002		933	0.621921	5294.65	Rep	S	Rep (u*_sk D)	2.98231	0.33532	7.38639	-0.987604	0.749812	-1.03408
934	0.625652	5238.46	Rep (u*_sk D)	u*_sk/ws	u*_sk/ws	1.37597	0.000942905	0.0110865	0.490464	0.974292	1.20606		934	0.621921	5294.65	S	Rep	Rep (u*_sk D)	2.98231	0.33532	7.38639	0.749812	-0.987604	-1.03408
935	0.625652	5238.46	u*_sk/ws	Rep (u*_sk D)	u*_sk/ws	1.37597	0.000942905	0.0110865	0.974292	0.490464	1.20606		935	0.621921	5294.65	Rep (u*_sk D)	Rep	S	2.98231	0.33532	7.38639	-1.03408	-0.987604	0.749812
936	0.625652	5238.46	u*_sk/ws	u*_sk/ws	Rep (u*_sk D)	1.37597	0.000942905	0.0110865	0.974292	1.20606	0.490464		936	0.621921	5294.65	Rep (u*_sk D)	S	Rep	2.98231	0.33532	7.38639	-1.03408	0.749812	-0.987604
937	0.62292	5287.73	Rep (u*_sk D)	Rep	S	1.95161	0.267194	7.9052	-0.953729	-1.02138	0.698731		937	0.622583	5316.58	Rep (u*D)	S	Rep (u*_sk D)	0.0145531	46.4517	15.5408	-2.31834	0.595	0.238319
938	0.62292	5287.73	Rep	Rep (u*_sk D)	S	1.95161	0.267194	7.9052	-1.02138	-0.953729	0.698731		938	0.622583	5316.58	Rep (u*_sk D)	Rep (u*D)	S	0.0145531	46.4517	15.5408	0.238319	-2.31834	0.595
939	0.62292	5287.73	Rep (u*_sk D)	S	Rep	1.95161	0.267194	7.9052	-0.953729	0.698731	-1.02138		939	0.622583	5316.58	Rep (u*D)	Rep (u*_sk D)	S	0.0145531	46.4517	15.5408	-2.31834	0.238319	0.595
940	0.62292	5287.73	S	Rep (u*_sk D)	Rep	1.95161	0.267194	7.9052	0.698731	-0.953729	-1.02138		940	0.622583	5316.58	Rep (u*_sk D)	S	Rep (u*D)	0.0145531	46.4517	15.5408	0.238319	0.595	-2.31834
941	0.62292	5287.73	Rep	S	Rep (u*_sk D)	1.95161	0.267194	7.9052	-1.02138	0.698731	-0.953729		941	0.622583	5316.58	S	Rep (u*_sk D)	Rep (u*D)	0.0145531	46.4517	15.5408	0.595	0.238319	-2.31834
942	0.62292	5287.73	S	Rep	Rep (u*_sk D)	1.95161	0.267194	7.9052	0.698731	-1.02138	-0.953729		942	0.622583	5316.58	S	Rep (u*D)	Rep (u*_sk D)	0.0145531	46.4517	15.5408	0.595	-2.31834	0.238319
943	0.622768	5319.24	Rep (u*_sk D)	Rep (u*D)	S	0.0106663	93.3116	10.0691	0.327818	-2.39724	0.586767		943	0.62081	5330.64	Rep (u*D)	Rep (u*D)	S	0.00648239	109.605	18.3846	0.372333	-2.52147	0.615244
944	0.622768	5319.24	Rep (u*D)	Rep (u*_sk D)	S	0.0106663	93.3116	10.0691	-2.39724	0.327818	0.586767		944	0.62081	5330.64	Rep (u*D)	S	Rep (u*D)	0.00648239	109.605	18.3846	0.372333	0.615244	-2.52147
945	0.622768	5319.24	Rep (u*_sk D)	S	Rep (u*D)	0.0106663	93.3116	10.0691	0.327818	0.586767	-2.39724		945	0.62081	5330.64	S	Rep (u*D)	Rep (u*D)	0.00648239	109.605	18.3846	0.615244	0.372333	-2.52147
946	0.622768	5319.24	S	Rep (u*_sk D)	Rep (u*D)	0.0106663	93.3116	10.0691	0.586767	0.327818	-2.39724		946	0.62081	5330.64	Rep (u*D)	S	S	128.573	397.235	0.000255779	-2.14916	0.698327	-0.0830772
947	0.622768	5319.24	Rep (u*D)	S	Rep (u*_sk D)	0.0106663	93.3116	10.0691	-2.39724	0.586767	0.327818		947	0.62081	5330.64	S	Rep (u*D)	S	128.573	397.235	0.000255779	0.698327	-2.14916	-0.0830772
948	0.622768	5319.24	S	Rep (u*D)	Rep (u*_sk D)	0.0106663	93.3116	10.0691	0.586767	-2.39724	0.327818		948	0.62081	5330.64	S	S	Rep (u*D)	128.573	397.235	0.000255779	0.698327	-0.0830772	-2.14916
949	0.620847	5331.2	Rep (u*D)	Rep (u*D)	S	1.89721	0.34151	20.5806	-3.63018	1.46839	0.613758		949	0.617009	5333.54	S	did50	u*/ws	34.6238	100.991	8.03134e-07	0.61689	2.0959	2.82733
950	0.620847	5331.2	Rep (u*D)	S	Rep (u*D)	1.89721	0.34151	20.5806	-3.63018	0.613758	1.46839		950	0.617009	5333.54	S	u*/ws	did50	34.6238	100.991	8.03134e-07	0.61689	2.82733	2.0959
951	0.620847	5331.2	S	Rep (u*D)	Rep (u*D)	1.89721	0.34151	20.5806	0.613758	-3.63018	1.46839		951	0.617009	5333.54	did50	S	u*/ws	34.6238	100.991	8.03134e-07	2.0959	0.61689	2.82733
952	0.620847	5331.2	Rep (u*D)	S	S	3287.9	452.14	8.96964e-06	-2.16181	0.778282	-0.16453		952	0.617009	5333.54	did50	u*/ws	S	34.6238	100.991	8.03134e-07	2.0959	2.82733	0.61689
953	0.620847	5331.2	S	Rep (u*D)	S	3287.9	452.14	8.96964e-06	0.778282	-2.16181	-0.16453		953	0.617009	5333.54	u*/ws	did50	S	34.6238	100.991	8.03134e-07	2.82733	2.0959	0.61689
954	0.620847	5331.2	S	S	Rep (u*D)	3287.9	452.14	8.96964e-06	0.778282	-0.16453	-2.16181		954	0.617009	5333.54	u*/ws	S	did50	34.6238	100.991	8.03134e-07	2.82733	0.61689	2.0959
955	0.617194	5336.23	did50	S	u*/ws	53.7777	887.967	5.66138e-08	2.09973	0.612074	2.81085		955	0.621779	5367.52	Fr	Rep (u*D)	S	2.34069	1.2507	0.0963211	1.01729	-1.67186	0.114672
956	0.617194	5336.23	S	did50	u*/ws	53.7777	887.967	5.66138e-08	0.612074	2.09973	2.81085		956	0.621779	5367.52	Rep (u*D)	Fr	S	2.34069	1.2507	0.0963211	-1.67186	1.01729	0.114672
957	0.617194	5336.23	did50	u*/ws	S	53.7777	887.967	5.66138e-08	2.09973	2.81085	0.612074		957	0.621779	5367.52	Fr	S	Rep (u*D)	2.34069	1.2507	0.0963211	1.01729	0.114672	-1.67186
958	0.617194	5336.23	S	u*/ws	did50	53.7777	887.967	5.66138e-08	0.612074	2.81085	2.09973		958	0.621779	5367.52	S	Fr	Rep (u*D)	2.34069	1.2507	0.0963211	0.114672	1.01729	-1.67186
959	0.617194	5336.23	u*/ws	did50	S	53.7777	887.967	5.66138e-08	2.81085	2.09973	0.612074		959	0.621779	5367.52	Rep (u*D)	S	Fr	2.34069	1.2507	0.0963211	-1.67186	0.114672	1.01729
960	0.617194	5336.23	u*/ws	S	did50	53.7777	887.967	5.66138e-08	2.81085	0.612074	2.09973		960	0.621779	5367.52	S	Rep (u*D)	Fr	2.34069	1.2507	0.0963211	0.114672	-1.67186	1.01729
961	0.614902	5413.97	u*_sk/ws	tau	tau	270.352	0.000404054	0.000391361	1.95024	3.66461	-3.6979		961	0.614686	5410.84	u*_sk/ws	tau	tau	0.392525	0.526126	0.000204555	1.94423	1.05716	-1.05726
962	0.614902	5413.97	tau	u*_sk/ws	tau	270.352	0.000404054	0.000391361	3.66461	1.95024	-3.6979		962	0.614686	5410.84	tau	tau	u*_sk/ws	0.392525	0.526126	0.000204555	1.05716	-1.05726	1.94423
963	0.614902	5413.97	tau	tau	u*_sk/ws	270.352	0.000404054	0.000391361	3.66461	-3.6979	1.95024		963	0.614686	5410.84	tau	u*_sk/ws	tau	0.392525	0.526126	0.000204555	1.05716	1.94423	-1.05726
964	0.614902	5413.96	u*_sk/ws	tau	u*_sk/ws	0.00660948	0.000704717	9.17833	0.298747	-0.0332227	1.65145		964	0.614686	5410.84	u*_sk/ws	u*_sk/ws	tau	0.0461673	0.000159804	5.72576	1.83277	0.111476	-0.000104871
965	0.614902	5413.96	tau	u*_sk/ws	u*_sk/ws	0.00660948	0.000704717	9.17833	-0.0332227	0.298747	1.65145		965	0.614686	5410.84	u*_sk/ws	tau	u*_sk/ws	0.0461673	0.000159804	5.72576	1.83277	-0.000104871	0.111476
966	0.614569	5486.22	Fr	Rep	Rep (u*D)	432.958	2.55429e-06	113.858	1.19748	-0.0937465	-1.58833		966	0.614686	5410.84	tau	u*_sk/ws	u*_sk/ws	0.0461673	0.000159804	5.72576	-0.000104871	1.83277	0.111476
967	0.614569	5486.22	Fr	Rep (u*D)	Rep	432.958	2.55429e-06	113.858	1.19748	-1.58833	-0.0937465		967	0.614473	5484.75	Fr	Rep (u*D)	Rep	4.38798e+09	1.74763e-48	1.53714e+37	1.18828	-1.57109	-0.0897722
968	0.614569	5486.22	Rep (u*D)	Fr	Rep	432.958	2.55429e-06	113.858	-1.58833	1.19748	-0.0937465		968	0.614473	5484.75	Rep (u*D)	Fr	Rep	4.38798e+09	1.74763e-48	1.53714e+37	-1.57109	1.18828	-0.0897722
969	0.614569	5486.22	Rep	Fr	Rep (u*D)	432.958	2.55429e-06	113.858	-0.0937465	1.19748	-1.58833		969	0.614473	5484.75	Fr	Rep	Rep (u*D)	4.38798e+09	1.74763e-48	1.53714e+37	1.18828	-0.0897722	-1.57109
970	0.614569	5486.22	Rep (u*D)	Rep	Fr	432.958	2.55429e-06	113.858	-1.58833	-0.0937465	1.19748		970	0.614473	5484.75	Rep	Fr	Rep (u*D)	4.38798e+09	1.74763e-48	1.53714e+37	-0.0897722	1.18828	-1.57109
971	0.614569	5486.22	Rep	Rep (u*D)	Fr	432.958	2.55429e-06	113.858	-0.0937465	-1.58833	1.19748		971	0.614473	5484.75	Rep (u*D)	Rep	Fr	4.38798e+09	1.74763e-48	1.53714e+37	-1.57109	-0.0897722	1.18828
972	0.614021	5493.41	Fr	Rep (u*D)	Rep (u*D)	3.70441e+11	1.32522e-05	3.09869e-08	1.21199	-6.00231	4.29154		972	0.614473	5484.75	Rep	Rep (u*D)	Fr	4.38798e+09	1.74763e-48	1.53714e+37	-0.0897722	-1.57109	1.18828
973	0.614021	5493.41	Rep (u*D)	Fr	Rep (u*D)	3.70441e+11	1.32522e-05	3.09869e-08	-6.00231	1.21199	4.29154		973	0.612219	5490.41	did50	Rep (u*_sk D)	Rep (u*D)	9.88984e-07	9.1258e-14	7.6216e+16	-1.60356	3.43811	-4.24655
974	0.614021	5493.41	Rep (u*D)	Rep (u*D)	Fr	3.70441e+11	1.32522e-05	3.09869e-08	-6.00231	4.29154	1.21199		974	0.612219	5490.41	Rep (u*_sk D)	did50	Rep (u*D)	9.88984e-07	9.1258e-14	7.6216e+16	3.43811	-1.60356	-4.24655
975	0.614021	5493.41	Fr	Fr	Rep (u*D)	1.49673	0.138296	0.734881	0.331289	0.880685	-1.71078		975	0.612219	5490.41	did50	Rep (u*D)	Rep (u*_sk D)	9.88984e-07	9.1258e-14	7.6216e+16	-1.60356	-4.24655	3.43811
976	0.614021	5493.41	Fr	Rep (u*D)	Fr	1.49673	0.138296	0.734881	0.331289	-1.71078	0.880685		976	0.612219	5490.41	Rep (u*D)	did50	Rep (u*_sk D)	9.88984e-07	9.1258e-14	7.6216e+16	-4.24655	-1.60356	3.43811
977	0.614021	5493.41	Rep (u*D)	Fr	Fr	1.49673	0.138296	0.734881	-1.71078	0.331289	0.880685		977	0.612219	5490.41	Rep (u*_sk D)	Rep (u*D)	did50	9.88984e-07	9.1258e-14	7.6216e+16	3.43811	-4.24655	-1.60356
978	0.61328	5509.07	Rep (u*_sk D)	Cf	tau_sk	5.60441	0.132136	0.000934347	-1.21958	-0.338086	1.40962		978	0.612219	5490.41	Rep (u*D)	Rep (u*_sk D)	did50	9.88984e-07	9.1258e-14	7.6216e+16	-4.24655	3.43811	-1.60356
979	0.61328	5509.07	Cf	Rep (u*_sk D)	tau_sk	5.60441	0.132136	0.000934347	-0.338086	-1.21958	1.40962		979	0.613926	5491.97	Fr	Rep (u*D)	Rep (u*D)	253.52	1.83964	0.000302968	1.20168	1.90011	-3.5892
980	0.61328	5509.07	Rep (u*_sk D)	tau_sk	Cf	5.60441	0.132136	0.000934347	-1.21958	1.40962	-0.338086		980	0.613926	5491.97	Rep (u*D)	Fr	Rep (u*D)	253.52	1.83964	0.000302968	1.90011	1.20168	-3.5892
981	0.61328	5509.07	tau_sk	Rep (u*_sk D)	Cf	5.60441	0.132136	0.000934347	1.40962	-1.21958	-0.338086		981	0.613926	5491.97	Rep (u*D)	Rep (u*D)	Fr	253.52	1.83964	0.000302968	1.90011	-3.5892	1.20168
982	0.61328	5509.07	Cf	tau_sk	Rep (u*_sk D)	5.60441	0.132136	0.000934347	-0.338086	1.40962	-1.21958		982	0.613926	5491.97	Rep (u*D)	Fr	Fr	1.68472	0.13556	0.618748	-1.68913	0.546837	0.654834
983	0.61328	5509.07	tau_sk	Cf	Rep (u*_sk D)	5.60441	0.132136	0.000934347	1.40962	-0.338086	-1.21958		983	0.613926	5491.97	Fr	Fr	Rep (u*D)	1.68472	0.13556	0.618748	0.546837	0.654834	-1.68913
984	0.61328	5509.07	h/Kc	Rep (u*_sk D)	tau_sk	0.492042	0.218471	0.0269209	0.112702	-1.21957	1.40962		984	0.613926	5491.97	Fr	Rep (u*D)	Fr	1.68472	0.13556	0.618748	0.546837	-1.68913	0.654834
985	0.61328	5509.07	Rep (u*_sk D)	h/Kc	tau_sk	0.492042	0.218471	0.0269209	-1.21957	0.112702	1.40962		985	0.613443	5502.78	Rep (u*D)	Fr	h/D50	2.56784	0.160429	0.0659463	-1.51977	1.73034	0.225678
986	0.61328	5509.07	h/Kc	tau_sk	Rep (u*_sk D)	0.492042	0.218471	0.0269209	0.112702	1.40962	-1.21957		986	0.613443	5502.78	h/D50	Rep (u*D)	Fr	2.56784	0.160429	0.0659463	0.225678	-1.51977	1.73034
987	0.61328	5509.07	tau_sk	h/Kc	Rep (u*_sk D)	0.492042	0.218471	0.0269209	1.40962	0.112702	-1.21957		987	0.613443	5502.78	Rep (u*D)	h/D50	Fr	2.56784	0.160429	0.0659463	-1.51977	0.225678	1.73034
988	0.61328	5509.07	Rep (u*_sk D)	tau_sk	h/Kc	0.492042	0.218471	0.0269209	-1.21957	1.40962	0.112702		988	0.613443	5502.78	Fr	h/D50	Rep (u*D)	2.56784	0.160429	0.0659463	1.73034	0.225678	-1.51977
989	0.61328	5509.07	tau_sk	Rep (u*_sk D)	h/Kc	0.492042	0.218471	0.0269209	1.40962	-1.21957	0.112702		989	0.613443	5502.78	h/D50	Fr	Rep (u*D)	2.56784	0.160429	0.0659463	0.225678	1.73034	-1.51977
990	0.612311	5491.8	did50	Rep (u*_sk D)	Rep (u*D)	2.03075e-11	3.01889e-09	1.20191e+17	-1.58561	3.41449	-4.25371		990	0.613443	5502.78	Fr	Rep (u*D)	h/D50	2.56784	0.160429	0.0659463	1.73034	-1.51977	0.225678
991	0.612311	5491.8	Rep (u*_sk D)	did50	Rep (u*D)	2.03075e-11	3.01889e-09	1.20191e+17	3.41449	-1.58561	-4.25371		991	0.613117	5506.67	Rep (u*_sk D)	Cf	tau_sk	93.3391	18.1149	4.31113e-07	-1.24569	-0.333514	1.38569
992	0.612311	5491.8	did50	Rep (u*D)	Rep (u*_sk D)	2.03075e-11	3.01889e-09	1.20191e+17	-1.58561	-4.25371	3.41449		992	0.613117	5506.67	Cf	Rep (u*_sk D)	tau_sk	93.3391	18.1149	4.31113e-07	-0.333514	-1.24569	1.38569
993	0.612311	5491.8	Rep (u*D)	did50	Rep (u*_sk D)	2.03075e-11	3.01889e-09	1.20191e+17	-4.25371	-1.58561	3.41449		993	0.613117	5506.67	tau_sk	Cf	Rep (u*_sk D)	93.3391	18.1149	4.31113e-07	1.38569	-0.333514	-1.24569
994	0.612311	5491.8	Rep (u*_sk D)	Rep (u*D)	did50	2.03075e-11	3.01889e-09	1.20191e+17	3.41449	-4.25371	-1.58561		994	0.613117	5506.67	Rep (u*_sk D)	tau_sk	Cf	93.3391	18.1149	4.31113e-07	-1.24569	1.38569	-0.333514
995	0.612311	5491.8	Rep (u*D)	Rep (u*_sk D)	did50	2.03075e-11	3.01889e-09	1.20191e+17	-4.25371	3.41449	-1.58561		995	0.613117	5506.67	tau_sk	Rep (u*_sk D)	Cf	93.3391	18.1149	4.31113e-07	1.38569	-1.24569	-0.333514
996	0.609827	5591.1	did50	Rep (u*_sk D)	tau_sk	1.58727e-05	1001.88	0.630906	0.537874	-1.51709	1.59754		996	0.613117	5506.67	Cf	tau_sk	Rep (u*_sk D)	93.3391	18.1149	4.31113e-07	-0.333514	1.38569	-1.24569
997	0.609827	5591.1	Rep (u*_sk D)	did50	tau_sk	1.58727e-05	1001.88	0.630906	-1.51709	0.537874	1.59754		997	0.613117	5506.67	h/Kc	Rep (u*_sk D)	tau_sk	0.430723	0.23036	0.0301367	0.111182	-1.24566	1.38569
998	0.609827	5591.1	did50	tau_sk	Rep (u*_sk D)	1.58727e-05	1001.88	0.630906	0.537874	1.59754	-1.51709		998	0.613117	5506.67	Rep (u*_sk D)	h/Kc	tau_sk	0.430723	0.23036	0.0301367	-1.24566	0.111182	1.38569
999	0.609827	5591.1	tau_sk	did50	Rep (u*_sk D)	1.58727e-05	1001.88	0.630906	1.59754	0.537874	-1.51709		999	0.613117	5506.67	h/Kc	tau_sk	Rep (u*_sk D)	0.430723	0.23036	0.0301367	0.111182	1.38569	-1.24566
1000	0.609827	5591.1	Rep (u*_sk D)	tau_sk	did50	1.58727e-05	1001.88	0.630906	-1.51709	1.59754	0.537874		1000	0.613117	5506.67	tau_sk	h/Kc	Rep (u*_sk D)	0.430723	0.23036	0.0301367	1.38569	0.111182	-1.24566
1001	0.609827	5591.1	tau_sk	Rep (u*_sk D)	did50	1.58727e-05	1001.88	0.630906	1.59754	-1.51709	0.537874		1001	0.613117	5506.67	Rep (u*_sk D)	tau_sk	h/Kc	0.430723	0.23036	0.0301367	-1.24566	1.38569	0.111182
1002	0.607395	5582.71	tau	Rep (u*_sk D)	tau_sk	0.304107	9.87088e-06	2582.35	-0.333671	-1.30974	1.68297		1002	0.613117	5506.67	tau_sk	Rep (u*_sk D)	h/Kc	0.430723	0.23036	0.0301367	1.38569	-1.24566	0.111182
1003	0.607395	5582.71	Rep (u*_sk D)	tau_sk	tau	0.304107	9.87088e-06	2582.35	-1.30974	1.68297	-0.333671		1003	0.607266	5514.71	Rep	Cf	u*_sk/ws	7.52106	0.0214638	0.0213624	-0.779633	0.553835	1.5933
1004	0.607395	5582.71	tau_sk	Rep (u*_sk D)	tau	0.304107	9.87088e-06	2582.35	1.68297	-1.30974	-0.333671		1004	0.607266	5514.71	Cf	Rep	u*_sk/ws	7.52106	0.0214638	0.0213624	0.553835	-0.779633	1.5933
1005	0.607395	5582.71	Rep (u*_sk D)	tau	tau_sk	0.304107	9.87088e-06	2582.35	-1.30974	-0.333671	1.68297		1005	0.607266	5514.71	Rep	u*_sk/ws	Cf	7.52106	0.0214638	0.0213624	-0.779633	1.5933	0.553835
1006	0.607395	5582.71	tau_sk	tau	Rep (u*_sk D)	0.304107	9.87088e-06	2582.35	1.68297	-0.333671	-1.30974		1006	0.607266	5514.71	u*_sk/ws	Rep	Cf	7.52106	0.0214638	0.0213624	1.5933	-0.779633	0.553835
1007	0.607395	5582.71	tau	tau_sk	Rep (u*_sk D)	0.304107	9.87088e-06	2582.35	-0.333671	1.68297	-1.30974		1007	0.607266	5514.71	Cf	u*_sk/ws	Rep	7.52106	0.0214638	0.0213624	0.553835	1.5933	-0.779633
1008	0.605905	5612.07	Fr	h/D50	Rep (u*D)	2.83329	0.0496923	0.152503	1.93621	0.275514	-1.4582		1008	0.607266	5514.71	u*_sk/ws	Cf	Rep	7.52106	0.0214638	0.0213624	1.5933	0.553835	-0.779633
1009	0.605905	5612.07	h/D50	Fr	Rep (u*D)	2.83329	0.0496923	0.152503	0.275514	1.93621	-1.4582		1009	0.600141	5574.44	tau_sk	Cf	u*/ws	3.38398e-06	0.131948	5.89533	0.966399	-0.645198	1.01841
1010	0.605905	5612.07	Fr	Rep (u*D)	h/D50	2.83329	0.0496923	0.152503	1.93621	-1.4582	0.275514		1010	0.600141	5574.44	u*/ws	tau_sk	Cf	3.38398e-06	0.131948	5.89533	1.01841	0.966399	-0.645198
1011	0.605905	5612.07	Rep (u*D)	Fr	h/D50	2.83329	0.0496923	0.152503	-1.4582	1.93621	0.275514		1011	0.600141	5574.44	tau_sk	u*/ws	Cf	3.38398e-06	0.131948	5.89533	0.966399	1.01841	-0.645198
1012	0.605905	5612.07	h/D50	Rep (u*D)	Fr	2.83329	0.0496923	0.152503	0.275514	-1.4582	1.93621		1012	0.600141	5574.44	u*/ws	Cf	tau_sk	3.38398e-06	0.131948	5.89533	1.01841	-0.645198	0.966399
1013	0.605905	5612.07	Rep (u*D)	h/D50	Fr	2.83329	0.0496923	0.152503	-1.4582	0.275514	1.93621		1013	0.600141	5574.44	Cf	u*/ws	tau_sk	3.38398e-06	0.131948	5.89533	-0.645198	1.01841	0.966399
1014	0.600407	5622.37	Rep (u*D)	S	did50	3.1035	3.29932	8.85633	-2.15362	0.81563	-0.0144282		1014	0.600141	5574.44	Cf	tau_sk	u*/ws	3.38398e-06	0.131948	5.89533	-0.645198	0.966399	1.01841
1015	0.600407	5622.37	did50	Rep (u*D)	S	3.1035	3.29932	8.85633	-0.0144282	-2.15362	0.81563		1015	0.609367	5584.25	did50	Rep (u*_sk D)	tau_sk	8.41038e-05	100.132	1.18069	0.491852	-1.53667	1.55176
1016	0.600407	5622.37	Rep (u*D)	did50	S	3.1035	3.29932	8.85633	-2.15362	-0.0144282	0.81563		1016	0.609367	5584.25	Rep (u*_sk D)	did50	tau_sk	8.41038e-05	100.132	1.18069	-1.53667	0.491852	1.55176
1017	0.600407	5622.37	did50	S	Rep (u*D)	3.1035	3.29932	8.85633	-0.0144282	0.81563	-2.15362		1017	0.609367	5584.25	tau_sk	did50	Rep (u*_sk D)	8.41038e-05	100.132	1.18069	1.55176	0.491852	-1.53667
1018	0.600407	5622.37	S	did50	Rep (u*D)	3.1035	3.29932	8.85633	0.81563	-0.0144282	-2.15362		1018	0.609367	5584.25	Rep (u*_sk D)	tau_sk	did50	8.41038e-05	100.132	1.18069	-1.53667	1.55176	0.491852
1019	0.600407	5622.37	S	Rep (u*D)	did50	3.1035	3.29932	8.85633	0.81563	-2.15362	-0.0144282		1019	0.609367	5584.25	did50	tau_sk	Rep (u*_sk D)	8.41038e-05	100.132	1.18069	0.491852	1.55176	-1.53667
1020	0.600282	5576.53	Cf	u*/ws	tau_sk	4.958e-05	0.278189	0.215027	-0.634004	0.985558	0.977045		1020	0.609367	5584.25	tau_sk	Rep (u*_sk D)	did50	8.41038e-05	100.132	1.18069	1.55176	-1.53667	0.491852
1021	0.600282	5576.53	u*/ws	Cf	tau_sk	4.958e-05	0.278189	0.215027	0.985558	-0.634004	0.977045		1021	0.60698	5590.45	Rep (u*_sk D)	tau_sk	tau	0.0115355	7.68309	0.0953553	-1.33345	1.73174	-0.376438
1022	0.600282	5576.53	Cf	tau_sk	u*/ws	4.958e-05	0.278189	0.215027	-0.634004	0.977045	0.985558		1022	0.60698	5590.45	tau_sk	Rep (u*_sk D)	tau	0.0115355	7.68309	0.0953553	1.73174	-1.33345	-0.376438
1023	0.600282	5576.53	tau_sk	Cf	u*/ws	4.958e-05	0.278189	0.215027	0.977045	-0.634004	0.985558		1023	0.60698	5590.45	tau	Rep (u*_sk D)	tau_sk	0.0115355	7.68309	0.0953553	-0.376438	-1.33345	1.73174
1024	0.600282	5576.53	u*/ws	tau_sk	Cf	4.958e-05	0.278189	0.215027	0.985558	0.977045	-0.634004		1024	0.60698	5590.45	tau	tau_sk	Rep (u*_sk D)	0.0115355	7.68309	0.0953553	-0.376438	1.73174	-1.33345
1025	0.600282	5576.53	tau_sk	u*/ws	Cf	4.958e-05	0.278189	0.215027	0.977045	0.985558	-0.634004		1025	0.60698	5590.45	Rep (u*_sk D)	tau	tau_sk	0.0115355	7.68309	0.0953553	-1.33345	-0.376438	1.73174
1026	0.59822	5594.94	did50	u*/ws	tau_sk	0.000735905	69.5233	0.00116088	1.50113	1.72807	1.14609		1026	0.60698	5590.45	tau_sk	tau	Rep (u*_sk D)	0.0115355	7.68309	0.0953553	1.73174	-0.376438	-1.33345
1027	0.59822	5594.94	u*/ws	did50	tau_sk	0.000735905	69.5233	0.00116088	1.72807	1.50113	1.14609		1027	0.59685	5639.81	u*/ws	h/Kc	tau_sk	0.00176882	0.379142	0.0876974	0.871714	0.20037	1.14453
1028	0.59822	5594.94	did50	tau_sk	u*/ws	0.000735905	69.5233	0.00116088	1.50113	1.14609	1.72807		1028	0.59685	5639.81	h/Kc	tau_sk	u*/ws	0.00176882	0.379142	0.0876974	0.20037	1.14453	0.871714
1029	0.59822	5594.94	tau_sk	did50	u*/ws	0.000735905	69.5233	0.00116088	1.14609	1.50113	1.72807		1029	0.59685	5639.81	tau_sk	h/Kc	u*/ws	0.00176882	0.379142	0.0876974	1.14453	0.20037	0.871714
1030	0.59822	5594.94	u*/ws	tau_sk	did50	0.000735905	69.5233	0.00116088	1.72807	1.14609	1.50113		1030	0.59685	5639.81	u*/ws	tau_sk	h/Kc	0.00176882	0.379142	0.0876974	0.871714	1.14453	0.20037
1031	0.59822	5594.94	tau_sk	u*/ws	did50	0.000735905	69.5233	0.00116088	1.14609	1.72807	1.50113		1031	0.59685	5639.81	tau_sk	u*/ws	h/Kc	0.00176882	0.379142	0.0876974	1.14453	0.871714	0.20037
1032	0.595221	5683.58	h/D50	Rep (u*D)	tau	3724.61	0.00567961	0.0280917	-0.339336	-2.00819	0.559217		1032	0.59685	5639.81	h/Kc	u*/ws	tau_sk	0.00176882	0.379142	0.0876974	0.20037	0.871714	1.14453
1033	0.595221	5683.58	Rep (u*D)	h/D50	tau	3724.61	0.00567961	0.0280917	-2.00819	-0.339336	0.559217		1033	0.594677	5641.66	did50	u*/ws	tau_sk	0.00307073	6.15969	0.00299229	1.27995	1.68363	1.03886
1034	0.595221	5683.58	h/D50	tau	Rep (u*D)	3724.61	0.00567961	0.0280917	-0.339336	0.559217	-2.00819		1034	0.594677	5641.66	u*/ws	did50	tau_sk	0.00307073	6.15969	0.00299229	1.68363	1.27995	1.03886
1035	0.595221	5683.58	tau	h/D50	Rep (u*D)	3724.61	0.00567961	0.0280917	0.559217	-0.339336	-2.00819		1035	0.594677	5641.66	did50	tau_sk	u*/ws	0.00307073	6.15969	0.00299229	1.27995	1.03886	1.68363
1036	0.595221	5683.58	Rep (u*D)	tau	h/D50	3724.61	0.00567961	0.0280917	-2.00819	0.559217	-0.339336		1036	0.594677	5641.66	tau_sk	did50	u*/ws	0.00307073	6.15969	0.00299229	1.03886	1.27995	1.68363
1037	0.595221	5683.58	tau	Rep (u*D)	h/D50	3724.61	0.00567961	0.0280917	0.559217	-2.00819	-0.339336		1037	0.594677	5641.66	u*/ws	tau_sk	did50	0.00307073	6.15969	0.00299229	1.68363	1.03886	1.27995
1038	0.591499	5808.34	Rep (u*_sk D)	u*/ws	tau_sk	0.0756713	0.25128	0.277656	-1.28523	0.0109224	1.48117		1038	0.594677	5641.66	tau_sk	u*/ws	did50	0.00307073	6.15969	0.00299229	1.03886	1.68363	1.27995
1039	0.591499	5808.34	u*/ws	Rep (u*_sk D)	tau_sk	0.0756713	0.25128	0.277656	0.0109224	-1.28523	1.48117		1039	0.595186	5683.09	h/D50	tau	Rep (u*D)	6.35435e+07	1.26162e-10	71.7003	-0.337612	0.568599	-2.00805
1040	0.591499	5808.34	Rep (u*_sk D)	tau_sk	u*/ws	0.0756713	0.25128	0.277656	-1.28523	1.48117	0.0109224		1040	0.595186	5683.09	h/D50	Rep (u*D)	tau	6.35435e+07	1.26162e-10	71.7003	-0.337612	-2.00805	0.568599
1041	0.591499	5808.34	tau_sk	Rep (u*_sk D)	u*/ws	0.0756713	0.25128	0.277656	1.48117	-1.28523	0.0109224		1041	0.595186	5683.09	Rep (u*D)	h/D50	tau	6.35435e+07	1.26162e-10	71.7003	-2.00805	-0.337612	0.568599
1042	0.591499	5808.34	u*/ws	tau_sk	Rep (u*_sk D)	0.0756713	0.25128	0.277656	0.0109224	1.48117	-1.28523		1042	0.595186	5683.09	tau	h/D50	Rep (u*D)	6.35435e+07	1.26162e-10	71.7003	0.568599	-0.337612	-2.00805
1043	0.591499	5808.34	tau_sk	u*/ws	Rep (u*_sk D)	0.0756713	0.25128	0.277656	1.48117	0.0109224	-1.28523		1043	0.595186	5683.09	Rep (u*D)	tau	h/D50	6.35435e+07	1.26162e-10	71.7003	-2.00805	0.568599	-0.337612
1044	0.591492	5810.3	Rep (u*_sk D)	tau_sk	tau_sk	0.000199658	184.292	0.148617	-1.29473	2.04913	-0.563592		1044	0.595186	5683.09	tau	Rep (u*D)	h/D50	6.35435e+07	1.26162e-10	71.7003	0.568599	-2.00805	-0.337612
1045	0.591492	5810.3	tau_sk	Rep (u*_sk D)	tau_sk	0.000199658	184.292	0.148617	2.04913	-1.29473	-0.563592		1045	0.590695	5795.91	u*/ws	Rep (u*_sk D)	tau_sk	0.357635	0.731915	0.0155575	0.11027	-1.24325	1.41535
1046	0.591492	5810.3	tau_sk	tau_sk	Rep (u*_sk D)	0.000199658	184.292	0.148617	2.04913	-0.563592	-1.29473		1046	0.590695	5795.91	Rep (u*_sk D)	u*/ws	tau_sk	0.357635	0.731915	0.0155575	-1.24325	0.11027	1.41535
1047	0.591492	5810.3	Rep (u*_sk D)	Rep (u*_sk D)	tau_sk	0.62745	6.63959	0.00131257	1.80017	-3.09488	1.48554		1047	0.590695	5795.91	Rep (u*_sk D)	tau_sk	u*/ws	0.357635	0.731915	0.0155575	-1.24325	1.41535	0.11027
1048	0.591492	5810.3	Rep (u*_sk D)	tau_sk	Rep (u*_sk D)	0.62745	6.63959	0.00131257	1.80017	1.48554	-3.09488		1048	0.590695	5795.91	tau_sk	Rep (u*_sk D)	u*/ws	0.357635	0.731915	0.0155575	1.41535	-1.24325	0.11027
1049	0.591492	5810.3	tau_sk	Rep (u*_sk D)	Rep (u*_sk D)	0.62745	6.63959	0.00131257	1.48554	1.80017	-3.09488		1049	0.590695	5795.91	u*/ws	tau_sk	Rep (u*_sk D)	0.357635	0.731915	0.0155575	0.11027	1.41535	-1.24325
1050	0.591125	5742	tau_sk	u*/ws	h/Kc	0.0031644	0.491212	0.0495892	1.24033	0.764206	0.187194		1050	0.590695	5795.91	tau_sk	u*/ws	Rep (u*_sk D)	0.357635	0.731915	0.0155575	1.41535	0.11027	-1.24325
1051	0.591125	5742	h/Kc	u*/ws	tau_sk	0.0031644	0.491212	0.0495892	0.187194	0.764206	1.24033		1051	0.591207	5806.09	Rep (u*_sk D)	Rep (u*_sk D)	tau_sk	0.794965	12.9152	0.000564651	1.92068	-3.26017	1.45608
1052	0.591125	5742	h/Kc	tau_sk	u*/ws	0.0031644	0.491212	0.0495892	0.187194	1.24033	0.764206		1052	0.591207	5806.09	Rep (u*_sk D)	tau_sk	Rep (u*_sk D)	0.794965	12.9152	0.000564651	1.92068	1.45608	-3.26017
1053	0.591125	5742	tau_sk	h/Kc	u*/ws	0.0031644	0.491212	0.0495892	1.24033	0.187194	0.764206		1053	0.591207	5806.09	tau_sk	Rep (u*_sk D)	Rep (u*_sk D)	0.794965	12.9152	0.000564651	1.45608	1.92068	-3.26017
1054	0.591125	5742	u*/ws	tau_sk	h/Kc	0.0031644	0.491212	0.0495892	0.764206	1.24033	0.187194		1054	0.591207	5806.09	Rep (u*_sk D)	tau_sk	tau_sk	0.000512734	167.399	0.0675442	-1.33949	2.23682	-0.780736
1055	0.591125	5742	u*/ws	h/Kc	tau_sk	0.0031644	0.491212	0.0495892	0.764206	0.187194	1.24033		1055	0.591207	5806.09	tau_sk	Rep (u*_sk D)	tau_sk	0.000512734	167.399	0.0675442	2.23682	-1.33949	-0.780736
1056	0.585329	5884.86	Rep	Rep (u*_sk D)	u*/ws	0.219906	0.0324589	0.00172605	-1.31052	1.43195	1.52687		1056	0.591207	5806.09	tau_sk	tau_sk	Rep (u*_sk D)	0.000512734	167.399	0.0675442	2.23682	-0.780736	-1.33949
1057	0.585329	5884.86	u*/ws	Rep (u*_sk D)	Rep	0.219906	0.0324589	0.00172605	1.52687	1.43195	-1.31052		1057	0.585605	5825.4	u*/ws	tau_sk	h/D50	8.37469e-07	0.996237	4058.21	1.22129	0.78897	-0.382168
1058	0.585329	5884.86	Rep (u*_sk D)	Rep	u*/ws	0.219906	0.0324589	0.00172605	1.43195	-1.31052	1.52687		1058	0.585605	5825.4	h/D50	u*/ws	tau_sk	8.37469e-07	0.996237	4058.21	-0.382168	1.22129	0.78897
1059	0.585329	5884.86	Rep (u*_sk D)	u*/ws	Rep	0.219906	0.0324589	0.00172605	1.43195	1.52687	-1.31052		1059	0.585605	5825.4	u*/ws	h/D50	tau_sk	8.37469e-07	0.996237	4058.21	1.22129	-0.382168	0.78897
1060	0.585329	5884.86	Rep	u*/ws	Rep (u*_sk D)	0.219906	0.0324589	0.00172605	-1.31052	1.52687	1.43195		1060	0.585605	5825.4	h/D50	tau_sk	u*/ws	8.37469e-07	0.996237	4058.21	-0.382168	0.78897	1.22129
1061	0.585329	5884.86	u*/ws	Rep	Rep (u*_sk D)	0.219906	0.0324589	0.00172605	1.52687	-1.31052	1.43195		1061	0.585605	5825.4	tau_sk	h/D50	u*/ws	8.37469e-07	0.996237	4058.21	0.78897	-0.382168	1.22129
1062	0.584908	5871.51	h/D50	tau_sk	u*/ws	0.0334086	0.030372	2.83022	-0.334555	0.922794	1.0471		1062	0.585605	5825.4	tau_sk	u*/ws	h/D50	8.37469e-07	0.996237	4058.21	0.78897	1.22129	-0.382168
1063	0.584908	5871.51	tau_sk	h/D50	u*/ws	0.0334086	0.030372	2.83022	0.922794	-0.334555	1.0471		1063	0.583513	5844.04	did50	Rep	tau	1.93584e-23	1.93663e+09	2.1133e+10	-0.848059	-1.36908	0.577555
1064	0.584908	5871.51	u*/ws	tau_sk	h/D50	0.0334086	0.030372	2.83022	1.0471	0.922794	-0.334555		1064	0.583513	5844.04	Rep	did50	tau	1.93584e-23	1.93663e+09	2.1133e+10	-1.36908	-0.848059	0.577555
1065	0.584908	5871.51	tau_sk	u*/ws	h/D50	0.0334086	0.030372	2.83022	0.922794	1.0471	-0.334555		1065	0.583513	5844.04	did50	tau	Rep	1.93584e-23	1.93663e+09	2.1133e+10	-0.848059	0.577555	-1.36908
1066	0.584908	5871.51	h/D50	u*/ws	tau_sk	0.0334086	0.030372	2.83022	-0.334555	1.0471	0.922794		1066	0.583513	5844.04	tau	did50	Rep	1.93584e-23	1.93663e+09	2.1133e+10	0.577555	-0.848059	-1.36908
1067	0.584908	5871.51	u*/ws	h/D50	tau_sk	0.0334086	0.030372	2.83022	1.0471	-0.334555	0.922794		1067	0.583513	5844.04	Rep	tau	did50	1.93584e-23	1.93663e+09	2.1133e+10	-1.36908	0.577555	-0.848059
1068	0.58369	5846.59	did50	Rep	tau	1.04678e+11	0.0184421	4.19268e-13	-0.852751	-1.36995	0.546728		1068	0.583513	5844.04	tau	Rep	did50	1.93584e-23	1.93663e+09	2.1133e+10	0.577555	-1.36908	-0.848059
1069	0.58369	5846.59	Rep	did50	tau	1.04678e+11	0.0184421	4.19268e-13	-1.36995	-0.852751	0.546728		1069	0.586421	5849.36	h/D50	Rep	S	0.672225	0.135298	6.20406	0.264817	-1.36933	0.896434
1070	0.58369	5846.59	did50	tau	Rep	1.04678e+11	0.0184421	4.19268e-13	-0.852751	0.546728	-1.36995		1070	0.586421	5849.36	Rep	h/D50	S	0.672225	0.135298	6.20406	-1.36933	0.264817	0.896434
1071	0.58369	5846.59	tau	did50	Rep	1.04678e+11	0.0184421	4.19268e-13	0.546728	-0.852751	-1.36995		1071	0.586421	5849.36	S	h/D50	Rep	0.672225	0.135298	6.20406	0.896434	0.264817	-1.36933
1072	0.58369	5846.59	Rep	tau	did50	1.04678e+11	0.0184421	4.19268e-13	-1.36995	0.546728	-0.852751		1072	0.586421	5849.36	Rep	S	h/D50	0.672225	0.135298	6.20406	-1.36933	0.896434	0.264817
1073	0.58369	5846.59	tau	Rep	did50	1.04678e+11	0.0184421	4.19268e-13	0.546728	-1.36995	-0.852751		1073	0.586421	5849.36	S	Rep	h/D50	0.672225	0.135298	6.20406	0.896434	-1.36933	0.264817
1074	0.583588	5890.5	Fr	Rep	Cf	148.309	1.78969	0.00209116	1.22682	-1.35992	0.61149		1074	0.586421	5849.36	h/D50	S	Rep	0.672225	0.135298	6.20406	0.264817	0.896434	-1.36933
1075	0.583588	5890.5	Rep	Fr	Cf	148.309	1.78969	0.00209116	-1.35992	1.22682	0.61149		1075	0.583481	5889.01	Fr	Rep	S	678.799	0.00563712	0.163613	-0.0486349	-1.36478	0.633437
1076	0.583588	5890.5	Fr	Cf	Rep	148.309	1.78969	0.00209116	1.22682	0.61149	-1.35992		1076	0.583481	5889.01	Fr	S	Rep	678.799	0.00563712	0.163613	-0.0486349	0.633437	-1.36478
1077	0.583588	5890.5	Cf	Fr	Rep	148.309	1.78969	0.00209116	0.61149	1.22682	-1.35992		1077	0.583481	5889.01	S	Fr	Rep	678.799	0.00563712	0.163613	0.633437	-0.0486349	-1.36478
1078	0.583588	5890.5	Rep	Cf	Fr	148.309	1.78969	0.00209116	-1.35992	0.61149	1.22682		1078	0.583481	5889.01	S	Rep	Fr	678.799	0.00563712	0.163613	0.633437	-1.36478	-0.0486349
1079	0.583588	5890.5	Cf	Rep	Fr	148.309	1.78969	0.00209116	0.61149	-1.35992	1.22682		1079	0.583481	5889.01	Rep	Fr	S	678.799	0.00563712	0.163613	-1.36478	-0.0486349	0.633437
1080	0.583588	5890.5	Fr	Rep	S	4.71319	0.493597	0.238591	0.00385815	-1.3599	0.61149		1080	0.583481	5889.01	Rep	S	Fr	678.799	0.00563712	0.163613	-1.36478	0.633437	-0.0486349
1081	0.583588	5890.5	Rep	Fr	S	4.71319	0.493597	0.238591	-1.3599	0.00385815	0.61149		1081	0.583481	5889.01	h/Kc	Fr	Rep	6.31456	0.0739729	0.0918036	-0.211151	1.21824	-1.36479
1082	0.583588	5890.5	Fr	S	Rep	4.71319	0.493597	0.238591	0.00385815	0.61149	-1.3599		1082	0.583481	5889.01	Rep	Fr	h/Kc	6.31456	0.0739729	0.0918036	-1.36479	1.21824	-0.211151
1083	0.583588	5890.5	S	Fr	Rep	4.71319	0.493597	0.238591	0.61149	0.00385815	-1.3599		1083	0.583481	5889.01	Fr	h/Kc	Rep	6.31456	0.0739729	0.0918036	1.21824	-0.211151	-1.36479
1084	0.583588	5890.5	Rep	S	Fr	4.71319	0.493597	0.238591	-1.3599	0.61149	0.00385815		1084	0.583481	5889.01	Fr	Rep	h/Kc	6.31456	0.0739729	0.0918036	1.21824	-1.36479	-0.211151
1085	0.583588	5890.5	S	Rep	Fr	4.71319	0.493597	0.238591	0.61149	-1.3599	0.00385815		1085	0.583481	5889.01	h/Kc	Rep	Fr	6.31456	0.0739729	0.0918036	-0.211151	-1.36479	1.21824
1086	0.583588	5890.5	Fr	Rep	h/Kc	26.4958	0.156478	0.0100628	1.22686	-1.35991	-0.203835		1086	0.583481	5889.01	Rep	h/Kc	Fr	6.31456	0.0739729	0.0918036	-1.36479	-0.211151	1.21824
1087	0.583588	5890.5	Rep	Fr	h/Kc	26.4958	0.156478	0.0100628	-1.35991	1.22686	-0.203835		1087	0.583467	5889.08	Rep	h/Kc	S	0.04918	14.3813	0.778038	-1.36506	-0.00868386	0.606108
1088	0.583588	5890.5	Fr	h/Kc	Rep	26.4958	0.156478	0.0100628	1.22686	-0.203835	-1.35991		1088	0.583467	5889.08	h/Kc	S	Rep	0.04918	14.3813	0.778038	-0.00868386	0.606108	-1.36506
1089	0.583588	5890.5	h/Kc	Fr	Rep	26.4958	0.156478	0.0100628	-0.203835	1.22686	-1.35991		1089	0.583467	5889.08	Rep	S	h/Kc	0.04918	14.3813	0.778038	-1.36506	0.606108	-0.00868386
1090	0.583588	5890.5	h/Kc	Rep	Fr	26.4958	0.156478	0.0100628	-0.203835	-1.35991	1.22686		1090	0.583467	5889.08	h/Kc	Rep	S	0.04918	14.3813	0.778038	-0.00868386	-1.36506	0.606108
1091	0.583588	5890.5	Rep	h/Kc	Fr	26.4958	0.156478	0.0100628	-1.35991	-0.203835	1.22686		1091	0.583467	5889.08	S	Rep	h/Kc	0.04918	14.3813	0.778038	0.606108	-1.36506	-0.00868386
1092	0.583587	5890.37	Rep	S	S	2.26825e-05	1537.1	16.0768	-1.36102	-2.31856	2.93173		1092	0.583467	5889.08	S	h/Kc	Rep	0.04918	14.3813	0.778038	0.606108	-0.00868386	-1.36506
1093	0.583587	5890.37	S	Rep	S	2.26825e-05	1537.1	16.0768	-2.31856	-1.36102	2.93173		1093	0.583549	5889.82	Rep	S	S	0.0515073	68.1836	0.15736	-1.35085	-1.16087	1.77296
1094	0.583587	5890.37	S	S	Rep	2.26825e-05	1537.1	16.0768	-2.31856	2.93173	-1.36102		1094	0.583549	5889.82	S	Rep	S	0.0515073	68.1836	0.15736	-1.16087	-1.35085	1.77296
1095	0.583587	5890.37	Rep	Rep	S	1.27408	0.0300488	14.6406	-1.93938	0.578371	0.61317		1095	0.583549	5889.82	S	S	Rep	0.0515073	68.1836	0.15736	-1.16087	1.77296	-1.35085
1096	0.583587	5890.37	Rep	S	Rep	1.27408	0.0300488	14.6406	-1.93938	0.61317	0.578371		1096	0.583549	5889.82	Rep	Rep	S	0.695264	0.166797	4.76597	-1.1485	-0.202355	0.612101
1097	0.583587	5890.37	S	Rep	Rep	1.27408	0.0300488	14.6406	0.61317	-1.93938	0.578371		1097	0.583549	5889.82	Rep	S	Rep	0.695264	0.166797	4.76597	-1.1485	0.612101	-0.202355
1098	0.583038	5896.8	Rep	S	h/Kc	0.051555	10.991	0.735331	-1.36314	0.579239	-0.00610049		1098	0.583549	5889.82	S	Rep	Rep	0.695264	0.166797	4.76597	0.612101	-1.1485	-0.202355
1099	0.583038	5896.8	h/Kc	Rep	S	0.051555	10.991	0.735331	-0.00610049	-1.36314	0.579239		1099	0.582091	5903.59	Rep	Cf	S	0.115885	13.8847	0.424494	-1.40511	0.0987934	0.569426
1100	0.583038	5896.8	Rep	h/Kc	S	0.051555	10.991	0.735331	-1.36314	-0.00610049	0.579239		1100	0.582091	5903.59	Cf	Rep	S	0.115885	13.8847	0.424494	0.0987934	-1.40511	0.569426
1101	0.583038	5896.8	h/Kc	S	Rep	0.051555	10.991	0.735331	-0.00610049	0.579239	-1.36314		1101	0.582091	5903.59	Cf	S	Rep	0.115885	13.8847	0.424494	0.0987934	0.569426	-1.40511
1102	0.583038	5896.8	S	h/Kc	Rep	0.051555	10.991	0.735331	0.579239	-0.00610049	-1.36314		1102	0.582091	5903.59	S	Cf	Rep	0.115885	13.8847	0.424494	0.569426	0.0987934	-1.40511
1103	0.583038	5896.8	S	Rep	h/Kc	0.051555	10.991	0.735331	0.579239	-1.36314	-0.00610049		1103	0.582091	5903.59	Rep	S	Cf	0.115885	13.8847	0.424494	-1.40511	0.569426	0.0987934
1104	0.582726	5904.13	Rep	S	h/D50	0.886131	0.11144	9.7698	-1.39395	1.05501	0.362179		1104	0.582091	5903.59	S	Rep	Cf	0.115885	13.8847	0.424494	0.569426	-1.40511	0.0987934
1105	0.582726	5904.13	h/D50	Rep	S	0.886131	0.11144	9.7698	0.362179	-1.39395	1.05501		1105	0.570216	5987.98	u*/ws	tau_sk	tau	0.905386	1.61059e-07	1275.47	1.0502	1.46809	-0.614196
1106	0.582726	5904.13	Rep	h/D50	S	0.886131	0.11144	9.7698	-1.39395	0.362179	1.05501		1106	0.570216	5987.98	tau_sk	u*/ws	tau	0.905386	1.61059e-07	1275.47	1.46809	1.0502	-0.614196
1107	0.582726	5904.13	h/D50	S	Rep	0.886131	0.11144	9.7698	0.362179	1.05501	-1.39395		1107	0.570216	5987.98	u*/ws	tau	tau_sk	0.905386	1.61059e-07	1275.47	1.0502	-0.614196	1.46809
1108	0.582726	5904.13	S	h/D50	Rep	0.886131	0.11144	9.7698	1.05501	0.362179	-1.39395		1108	0.570216	5987.98	tau	u*/ws	tau_sk	0.905386	1.61059e-07	1275.47	-0.614196	1.0502	1.46809
1109	0.582726	5904.13	S	Rep	h/D50	0.886131	0.11144	9.7698	1.05501	-1.39395	0.362179		1109	0.570216	5987.98	tau_sk	tau	u*/ws	0.905386	1.61059e-07	1275.47	1.46809	-0.614196	1.0502
1110	0.582651	5901.48	Rep	Cf	S	0.297128	20.7061	0.158511	-1.38516	0.0323766	0.649007		1110	0.570216	5987.98	tau	tau_sk	u*/ws	0.905386	1.61059e-07	1275.47	-0.614196	1.46809	1.0502
1111	0.582651	5901.48	Cf	Rep	S	0.297128	20.7061	0.158511	0.0323766	-1.38516	0.649007		1111	0.568141	6005.89	u*/ws	h/D50	tau	2.94592e-07	5.93664e+06	0.0193752	2.10259	-0.73228	-0.630162
1112	0.582651	5901.48	Rep	S	Cf	0.297128	20.7061	0.158511	-1.38516	0.649007	0.0323766		1112	0.568141	6005.89	u*/ws	tau	h/D50	2.94592e-07	5.93664e+06	0.0193752	2.10259	-0.630162	-0.73228
1113	0.582651	5901.48	S	Rep	Cf	0.297128	20.7061	0.158511	0.649007	-1.38516	0.0323766		1113	0.568141	6005.89	h/D50	u*/ws	tau	2.94592e-07	5.93664e+06	0.0193752	-0.73228	2.10259	-0.630162
1114	0.582651	5901.48	Cf	S	Rep	0.297128	20.7061	0.158511	0.0323766	0.649007	-1.38516		1114	0.568141	6005.89	h/D50	tau	u*/ws	2.94592e-07	5.93664e+06	0.0193752	-0.73228	-0.630162	2.10259
1115	0.582651	5901.48	S	Cf	Rep	0.297128	20.7061	0.158511	0.649007	0.0323766	-1.38516		1115	0.568141	6005.89	tau	u*/ws	h/D50	2.94592e-07	5.93664e+06	0.0193752	-0.630162	2.10259	-0.73228
1116	0.573456	6036.41	Rep	Rep (u*D)	h/D50	4.71429e-06	55988.8	3.47723	-0.780784	-0.926698	-0.484895		1116	0.568141	6005.89	tau	h/D50	u*/ws	2.94592e-07	5.93664e+06	0.0193752	-0.630162	-0.73228	2.10259
1117	0.573456	6036.41	h/D50	Rep (u*D)	Rep	4.71429e-06	55988.8	3.47723	-0.484895	-0.926698	-0.780784		1117	0.573376	6035.2	Rep	h/D50	Rep (u*D)	23748.6	0.75967	5.01122e-05	-0.765713	-0.485887	-0.925084
1118	0.573456	6036.41	Rep (u*D)	h/D50	Rep	4.71429e-06	55988.8	3.47723	-0.926698	-0.484895	-0.780784		1118	0.573376	6035.2	Rep	Rep (u*D)	h/D50	23748.6	0.75967	5.01122e-05	-0.765713	-0.925084	-0.485887
1119	0.573456	6036.41	h/D50	Rep	Rep (u*D)	4.71429e-06	55988.8	3.47723	-0.484895	-0.780784	-0.926698		1119	0.573376	6035.2	h/D50	Rep (u*D)	Rep	23748.6	0.75967	5.01122e-05	-0.485887	-0.925084	-0.765713
1120	0.573456	6036.41	Rep	h/D50	Rep (u*D)	4.71429e-06	55988.8	3.47723	-0.780784	-0.484895	-0.926698		1120	0.573376	6035.2	h/D50	Rep	Rep (u*D)	23748.6	0.75967	5.01122e-05	-0.485887	-0.765713	-0.925084
1121	0.573456	6036.41	Rep (u*D)	Rep	h/D50	4.71429e-06	55988.8	3.47723	-0.926698	-0.780784	-0.484895		1121	0.573376	6035.2	Rep (u*D)	Rep	h/D50	23748.6	0.75967	5.01122e-05	-0.925084	-0.765713	-0.485887
1122	0.570515	5992.54	u*/ws	tau_sk	tau	0.594366	0.0354269	0.00936323	1.00057	1.47489	-0.586667		1122	0.573376	6035.2	Rep (u*D)	h/D50	Rep	23748.6	0.75967	5.01122e-05	-0.925084	-0.485887	-0.765713
1123	0.570515	5992.54	tau_sk	u*/ws	tau	0.594366	0.0354269	0.00936323	1.47489	1.00057	-0.586667		1123	0.567975	6062.02	Rep	u*/ws	tau	0.0592625	0.0934788	0.0591326	-1.12571	0.564616	0.597015
1124	0.570515	5992.54	u*/ws	tau	tau_sk	0.594366	0.0354269	0.00936323	1.00057	-0.586667	1.47489		1124	0.567975	6062.02	Rep	tau	u*/ws	0.0592625	0.0934788	0.0591326	-1.12571	0.597015	0.564616
1125	0.570515	5992.54	tau	u*/ws	tau_sk	0.594366	0.0354269	0.00936323	-0.586667	1.00057	1.47489		1125	0.567975	6062.02	tau	Rep	u*/ws	0.0592625	0.0934788	0.0591326	0.597015	-1.12571	0.564616
1126	0.570515	5992.54	tau_sk	tau	u*/ws	0.594366	0.0354269	0.00936323	1.47489	-0.586667	1.00057		1126	0.567975	6062.02	u*/ws	Rep	tau	0.0592625	0.0934788	0.0591326	0.564616	-1.12571	0.597015
1127	0.570515	5992.54	tau	tau_sk	u*/ws	0.594366	0.0354269	0.00936323	-0.586667	1.47489	1.00057		1127	0.567975	6062.02	u*/ws	tau	Rep	0.0592625	0.0934788	0.0591326	0.564616	0.597015	-1.12571
1128	0.569764	6067.04	Rep (u*_sk D)	h/D50	Rep	20739.7	0.000332389	0.161634	-0.657936	-0.562621	-1.07373		1128	0.567975	6062.02	tau	u*/ws	Rep	0.0592625	0.0934788	0.0591326	0.597015	0.564616	-1.12571
1129	0.569764	6067.04	Rep	h/D50	Rep (u*_sk D)	20739.7	0.000332389	0.161634	-1.07373	-0.562621	-0.657936		1129	0.569647	6065.37	h/D50	Rep (u*_sk D)	Rep	17533.1	0.00308135	0.0220182	-0.566719	-0.692321	-1.04692
1130	0.569764	6067.04	Rep (u*_sk D)	Rep	h/D50	20739.7	0.000332389	0.161634	-0.657936	-1.07373	-0.562621		1130	0.569647	6065.37	Rep (u*_sk D)	h/D50	Rep	17533.1	0.00308135	0.0220182	-0.692321	-0.566719	-1.04692
1131	0.569764	6067.04	Rep	Rep (u*_sk D)	h/D50	20739.7	0.000332389	0.161634	-1.07373	-0.657936	-0.562621		1131	0.569647	6065.37	h/D50	Rep	Rep (u*_sk D)	17533.1	0.00308135	0.0220182	-0.566719	-1.04692	-0.692321
1132	0.569764	6067.04	h/D50	Rep (u*_sk D)	Rep	20739.7	0.000332389	0.161634	-0.562621	-0.657936	-1.07373		1132	0.569647	6065.37	Rep	h/D50	Rep (u*_sk D)	17533.1	0.00308135	0.0220182	-1.04692	-0.566719	-0.692321
1133	0.569764	6067.04	h/D50	Rep	Rep (u*_sk D)	20739.7	0.000332389	0.161634	-0.562621	-1.07373	-0.657936		1133	0.569647	6065.37	Rep (u*_sk D)	Rep	h/D50	17533.1	0.00308135	0.0220182	-0.692321	-1.04692	-0.566719
1134	0.569138	6106.87	Rep (u*D)	Cf	tau	7.89843	0.00182419	0.0114761	-1.56982	-0.611243	0.992068		1134	0.569647	6065.37	Rep	Rep (u*_sk D)	h/D50	17533.1	0.00308135	0.0220182	-1.04692	-0.692321	-0.566719
1135	0.569138	6106.87	Cf	Rep (u*D)	tau	7.89843	0.00182419	0.0114761	-0.611243	-1.56982	0.992068		1135	0.567762	6072.79	Rep (u*D)	Rep	tau	0.0139047	0.944255	0.301919	-0.996111	-0.754914	0.820398
1136	0.569138	6106.87	Rep (u*D)	tau	Cf	7.89843	0.00182419	0.0114761	-1.56982	0.992068	-0.611243		1136	0.567762	6072.79	Rep	Rep (u*D)	tau	0.0139047	0.944255	0.301919	-0.754914	-0.996111	0.820398
1137	0.569138	6106.87	tau	Rep (u*D)	Cf	7.89843	0.00182419	0.0114761	0.992068	-1.56982	-0.611243		1137	0.567762	6072.79	Rep (u*D)	tau	Rep	0.0139047	0.944255	0.301919	-0.996111	0.820398	-0.754914
1138	0.569138	6106.87	Cf	tau	Rep (u*D)	7.89843	0.00182419	0.0114761	-0.611243	0.992068	-1.56982		1138	0.567762	6072.79	tau	Rep (u*D)	Rep	0.0139047	0.944255	0.301919	0.820398	-0.996111	-0.754914
1139	0.569138	6106.87	tau	Cf	Rep (u*D)	7.89843	0.00182419	0.0114761	0.992068	-0.611243	-1.56982		1139	0.567762	6072.79	Rep	tau	Rep (u*D)	0.0139047	0.944255	0.301919	-0.754914	0.820398	-0.996111
1140	0.569138	6106.86	tau	h/Kc	Rep (u*D)	0.867347	0.171939	0.0147361	0.992086	0.203747	-1.56982		1140	0.567762	6072.79	tau	Rep	Rep (u*D)	0.0139047	0.944255	0.301919	0.820398	-0.754914	-0.996111
1141	0.569138	6106.86	tau	Rep (u*D)	h/Kc	0.867347	0.171939	0.0147361	0.992086	-1.56982	0.203747		1141	0.569068	6105.88	Rep (u*D)	Cf	tau	24.3061	0.000909541	0.00849286	-1.58216	-0.592168	0.994525
1142	0.569138	6106.86	h/Kc	Rep (u*D)	tau	0.867347	0.171939	0.0147361	0.203747	-1.56982	0.992086		1142	0.569068	6105.88	Cf	Rep (u*D)	tau	24.3061	0.000909541	0.00849286	-0.592168	-1.58216	0.994525
1143	0.569138	6106.86	Rep (u*D)	h/Kc	tau	0.867347	0.171939	0.0147361	-1.56982	0.203747	0.992086		1143	0.569068	6105.88	Rep (u*D)	tau	Cf	24.3061	0.000909541	0.00849286	-1.58216	0.994525	-0.592168
1144	0.569138	6106.86	Rep (u*D)	tau	h/Kc	0.867347	0.171939	0.0147361	-1.56982	0.992086	0.203747		1144	0.569068	6105.88	tau	Rep (u*D)	Cf	24.3061	0.000909541	0.00849286	0.994525	-1.58216	-0.592168
1145	0.569138	6106.86	h/Kc	tau	Rep (u*D)	0.867347	0.171939	0.0147361	0.203747	0.992086	-1.56982		1145	0.569068	6105.88	Cf	tau	Rep (u*D)	24.3061	0.000909541	0.00849286	-0.592168	0.994525	-1.58216
1146	0.568153	6064.57	Rep	u*/ws	tau	1.50325	0.419175	0.000524605	-1.12367	0.568895	0.566101		1146	0.569068	6105.88	tau	Cf	Rep (u*D)	24.3061	0.000909541	0.00849286	0.994525	-0.592168	-1.58216
1147	0.568153	6064.57	u*/ws	Rep	tau	1.50325	0.419175	0.000524605	0.568895	-1.12367	0.566101		1147	0.569068	6105.88	h/Kc	Rep (u*D)	tau	170.349	0.195412	6.91474e-05	0.197396	-1.58214	0.994519
1148	0.568153	6064.57	Rep	tau	u*/ws	1.50325	0.419175	0.000524605	-1.12367	0.566101	0.568895		1148	0.569068	6105.88	Rep (u*D)	tau	h/Kc	170.349	0.195412	6.91474e-05	-1.58214	0.994519	0.197396
1149	0.568153	6064.57	tau	Rep	u*/ws	1.50325	0.419175	0.000524605	0.566101	-1.12367	0.568895		1149	0.569068	6105.88	Rep (u*D)	h/Kc	tau	170.349	0.195412	6.91474e-05	-1.58214	0.197396	0.994519
1150	0.568153	6064.57	u*/ws	tau	Rep	1.50325	0.419175	0.000524605	0.568895	0.566101	-1.12367		1150	0.569068	6105.88	h/Kc	tau	Rep (u*D)	170.349	0.195412	6.91474e-05	0.197396	0.994519	-1.58214
1151	0.568153	6064.57	tau	u*/ws	Rep	1.50325	0.419175	0.000524605	0.566101	0.568895	-1.12367		1151	0.569068	6105.88	tau	h/Kc	Rep (u*D)	170.349	0.195412	6.91474e-05	0.994519	0.197396	-1.58214
1152	0.566327	6130.83	did50	h/D50	Cf	3091.15	1.32366e-07	0.0288699	-2.06027	-0.633772	-1.61681		1152	0.569068	6105.88	tau	Rep (u*D)	h/Kc	170.349	0.195412	6.91474e-05	0.994519	-1.58214	0.197396
1153	0.566327	6130.83	Cf	did50	h/D50	3091.15	1.32366e-07	0.0288699	-1.61681	-2.06027	-0.633772		1153	0.563764	6121.65	did50	h/D50	Rep (u*D)	2.22499	5.72155e-06	110672	-0.597673	-0.43496	-1.86692
1154	0.566327	6130.83	Cf	h/D50	did50	3091.15	1.32366e-07	0.0288699	-1.61681	-0.633772	-2.06027		1154	0.563764	6121.65	h/D50	did50	Rep (u*D)	2.22499	5.72155e-06	110672	-0.43496	-0.597673	-1.86692
1155	0.566327	6130.83	h/D50	did50	Cf	3091.15	1.32366e-07	0.0288699	-0.633772	-2.06027	-1.61681		1155	0.563764	6121.65	did50	Rep (u*D)	h/D50	2.22499	5.72155e-06	110672	-0.597673	-1.86692	-0.43496
1156	0.566327	6130.83	did50	Cf	h/D50	3091.15	1.32366e-07	0.0288699	-2.06027	-1.61681	-0.633772		1156	0.563764	6121.65	Rep (u*D)	did50	h/D50	2.22499	5.72155e-06	110672	-1.86692	-0.597673	-0.43496
1157	0.566327	6130.83	h/D50	Cf	did50	3091.15	1.32366e-07	0.0288699	-0.633772	-1.61681	-2.06027		1157	0.563764	6121.65	h/D50	Rep (u*D)	did50	2.22499	5.72155e-06	110672	-0.43496	-1.86692	-0.597673
1158	0.566327	6130.83	did50	h/Kc	h/D50	11.0885	0.00852397	0.117171	-2.06026	0.538938	-0.633785		1158	0.563764	6121.65	Rep (u*D)	h/D50	did50	2.22499	5.72155e-06	110672	-1.86692	-0.43496	-0.597673
1159	0.566327	6130.83	h/Kc	did50	h/D50	11.0885	0.00852397	0.117171	0.538938	-2.06026	-0.633785		1159	0.566304	6130.5	did50	h/D50	Cf	1.74088e+06	2.60405e-09	0.00240986	-2.07249	-0.63203	-1.62631
1160	0.566327	6130.83	did50	h/D50	h/Kc	11.0885	0.00852397	0.117171	-2.06026	-0.633785	0.538938		1160	0.566304	6130.5	h/D50	did50	Cf	1.74088e+06	2.60405e-09	0.00240986	-0.63203	-2.07249	-1.62631
1161	0.566327	6130.83	h/D50	did50	h/Kc	11.0885	0.00852397	0.117171	-0.633785	-2.06026	0.538938		1161	0.566304	6130.5	h/D50	Cf	did50	1.74088e+06	2.60405e-09	0.00240986	-0.63203	-1.62631	-2.07249
1162	0.566327	6130.83	h/Kc	h/D50	did50	11.0885	0.00852397	0.117171	0.538938	-0.633785	-2.06026		1162	0.566304	6130.5	did50	Cf	h/D50	1.74088e+06	2.60405e-09	0.00240986	-2.07249	-1.62631	-0.63203
1163	0.566327	6130.83	h/D50	h/Kc	did50	11.0885	0.00852397	0.117171	-0.633785	0.538938	-2.06026		1163	0.566304	6130.5	Cf	did50	h/D50	1.74088e+06	2.60405e-09	0.00240986	-1.62631	-2.07249	-0.63203
1164	0.563862	6123.07	did50	h/D50	Rep (u*D)	4.02795	0.0414558	8.35532	-0.572978	-0.429622	-1.87912		1164	0.566304	6130.5	Cf	h/D50	did50	1.74088e+06	2.60405e-09	0.00240986	-1.62631	-0.63203	-2.07249
1165	0.563862	6123.07	h/D50	did50	Rep (u*D)	4.02795	0.0414558	8.35532	-0.429622	-0.572978	-1.87912		1165	0.566304	6130.5	did50	h/Kc	h/D50	36.6803	0.000760135	0.382401	-2.07249	0.542101	-0.632031
1166	0.563862	6123.07	did50	Rep (u*D)	h/D50	4.02795	0.0414558	8.35532	-0.572978	-1.87912	-0.429622		1166	0.566304	6130.5	h/Kc	did50	h/D50	36.6803	0.000760135	0.382401	0.542101	-2.07249	-0.632031
1167	0.563862	6123.07	Rep (u*D)	did50	h/D50	4.02795	0.0414558	8.35532	-1.87912	-0.572978	-0.429622		1167	0.566304	6130.5	did50	h/D50	h/Kc	36.6803	0.000760135	0.382401	-2.07249	-0.632031	0.542101
1168	0.563862	6123.07	h/D50	Rep (u*D)	did50	4.02795	0.0414558	8.35532	-0.429622	-1.87912	-0.572978		1168	0.566304	6130.5	h/D50	did50	h/Kc	36.6803	0.000760135	0.382401	-0.632031	-2.07249	0.542101
1169	0.563862	6123.07	Rep (u*D)	h/D50	did50	4.02795	0.0414558	8.35532	-1.87912	-0.429622	-0.572978		1169	0.566304	6130.5	h/Kc	h/D50	did50	36.6803	0.000760135	0.382401	0.542101	-0.632031	-2.07249
1170	0.558978	6231.72	S	tau_sk	u*/ws	0.00578015	3.96111	0.071387	0.294727	0.920236	1.01836		1170	0.566304	6130.5	h/D50	h/Kc	did50	36.6803	0.000760135	0.382401	-0.632031	0.542101	-2.07249
1171	0.558978	6231.72	tau_sk	S	u*/ws	0.00578015	3.96111	0.071387	0.920236	0.294727	1.01836		1171	0.566372	6171.46	u*/ws	Rep (u*_sk D)	Rep	0.24113	0.0399199	0.0066786	1.04559	0.877619	-1.26429
1172	0.558978	6231.72	S	u*/ws	tau_sk	0.00578015	3.96111	0.071387	0.294727	1.01836	0.920236		1172	0.566372	6171.46	Rep	u*/ws	Rep (u*_sk D)	0.24113	0.0399199	0.0066786	-1.26429	1.04559	0.877619
1173	0.558978	6231.72	u*/ws	S	tau_sk	0.00578015	3.96111	0.071387	1.01836	0.294727	0.920236		1173	0.566372	6171.46	Rep	Rep (u*_sk D)	u*/ws	0.24113	0.0399199	0.0066786	-1.26429	0.877619	1.04559
1174	0.558978	6231.72	u*/ws	tau_sk	S	0.00578015	3.96111	0.071387	1.01836	0.920236	0.294727		1174	0.566372	6171.46	Rep (u*_sk D)	u*/ws	Rep	0.24113	0.0399199	0.0066786	0.877619	1.04559	-1.26429
1175	0.558978	6231.72	tau_sk	u*/ws	S	0.00578015	3.96111	0.071387	0.920236	1.01836	0.294727		1175	0.566372	6171.46	u*/ws	Rep	Rep (u*_sk D)	0.24113	0.0399199	0.0066786	1.04559	-1.26429	0.877619
1176	0.55659	6235.27	Rep (u*D)	Rep	tau	0.000137685	2.55545e-05	435851	-0.360473	-1.13653	0.820365		1176	0.566372	6171.46	Rep (u*_sk D)	Rep	u*/ws	0.24113	0.0399199	0.0066786	0.877619	-1.26429	1.04559
1177	0.55659	6235.27	Rep	Rep (u*D)	tau	0.000137685	2.55545e-05	435851	-1.13653	-0.360473	0.820365		1177	0.558407	6223.2	S	u*/ws	tau_sk	0.00597946	3.39534	0.0731809	0.295356	1.08229	0.883873
1178	0.55659	6235.27	Rep (u*D)	tau	Rep	0.000137685	2.55545e-05	435851	-0.360473	0.820365	-1.13653		1178	0.558407	6223.2	u*/ws	S	tau_sk	0.00597946	3.39534	0.0731809	1.08229	0.295356	0.883873
1179	0.55659	6235.27	Rep	tau	Rep (u*D)	0.000137685	2.55545e-05	435851	-1.13653	0.820365	-0.360473		1179	0.558407	6223.2	S	tau_sk	u*/ws	0.00597946	3.39534	0.0731809	0.295356	0.883873	1.08229
1180	0.55659	6235.27	tau	Rep (u*D)	Rep	0.000137685	2.55545e-05	435851	0.820365	-0.360473	-1.13653		1180	0.558407	6223.2	tau_sk	S	u*/ws	0.00597946	3.39534	0.0731809	0.883873	0.295356	1.08229
1181	0.55659	6235.27	tau	Rep	Rep (u*D)	0.000137685	2.55545e-05	435851	0.820365	-1.13653	-0.360473		1181	0.558407	6223.2	u*/ws	tau_sk	S	0.00597946	3.39534	0.0731809	1.08229	0.883873	0.295356
1182	0.551493	6325.64	Rep	tau	Cf	0.0375103	1.16329e-11	1.61782e+08	-1.12244	1.00865	-0.379145		1182	0.558407	6223.2	tau_sk	u*/ws	S	0.00597946	3.39534	0.0731809	0.883873	1.08229	0.295356
1183	0.551493	6325.64	tau	Rep	Cf	0.0375103	1.16329e-11	1.61782e+08	1.00865	-1.12244	-0.379145		1183	0.557073	6282.44	Fr	h/D50	Rep	30.1646	0.012503	0.251404	0.483493	-0.324362	-1.17694
1184	0.551493	6325.64	Cf	tau	Rep	0.0375103	1.16329e-11	1.61782e+08	-0.379145	1.00865	-1.12244		1184	0.557073	6282.44	h/D50	Fr	Rep	30.1646	0.012503	0.251404	-0.324362	0.483493	-1.17694
1185	0.551493	6325.64	tau	Cf	Rep	0.0375103	1.16329e-11	1.61782e+08	1.00865	-0.379145	-1.12244		1185	0.557073	6282.44	Fr	Rep	h/D50	30.1646	0.012503	0.251404	0.483493	-1.17694	-0.324362
1186	0.551493	6325.64	Rep	Cf	tau	0.0375103	1.16329e-11	1.61782e+08	-1.12244	-0.379145	1.00865		1186	0.557073	6282.44	Rep	Fr	h/D50	30.1646	0.012503	0.251404	-1.17694	0.483493	-0.324362
1187	0.551493	6325.64	Cf	Rep	tau	0.0375103	1.16329e-11	1.61782e+08	-0.379145	-1.12244	1.00865		1187	0.557073	6282.44	h/D50	Rep	Fr	30.1646	0.012503	0.251404	-0.324362	-1.17694	0.483493
1188	0.551493	6325.65	h/Kc	Rep	tau	89.9457	0.0125721	0.000310661	0.126385	-1.12243	1.00865		1188	0.557073	6282.44	Rep	h/D50	Fr	30.1646	0.012503	0.251404	-1.17694	-0.324362	0.483493
1189	0.551493	6325.65	Rep	h/Kc	tau	89.9457	0.0125721	0.000310661	-1.12243	0.126385	1.00865		1189	0.552782	6312.81	h/Kc	h/D50	Rep	0.0319993	0.834401	15.7677	-0.0638043	-0.508983	-1.41467
1190	0.551493	6325.65	h/Kc	tau	Rep	89.9457	0.0125721	0.000310661	0.126385	1.00865	-1.12243		1190	0.552782	6312.81	h/D50	Rep	h/Kc	0.0319993	0.834401	15.7677	-0.508983	-1.41467	-0.0638043
1191	0.551493	6325.65	tau	h/Kc	Rep	89.9457	0.0125721	0.000310661	1.00865	0.126385	-1.12243		1191	0.552782	6312.81	Rep	h/D50	h/Kc	0.0319993	0.834401	15.7677	-1.41467	-0.508983	-0.0638043
1192	0.551493	6325.65	Rep	tau	h/Kc	89.9457	0.0125721	0.000310661	-1.12243	1.00865	0.126385		1192	0.552782	6312.81	h/D50	h/Kc	Rep	0.0319993	0.834401	15.7677	-0.508983	-0.0638043	-1.41467
1193	0.551493	6325.65	tau	Rep	h/Kc	89.9457	0.0125721	0.000310661	1.00865	-1.12243	0.126385		1193	0.552782	6312.81	h/Kc	Rep	h/D50	0.0319993	0.834401	15.7677	-0.0638043	-1.41467	-0.508983
1194	0.550353	6365.76	h/D50	h/D50	Rep	0.0783944	7.30894	0.576484	0.857195	-1.38003	-1.31536		1194	0.552782	6312.81	Rep	h/Kc	h/D50	0.0319993	0.834401	15.7677	-1.41467	-0.0638043	-0.508983
1195	0.550353	6365.76	h/D50	Rep	h/D50	0.0783944	7.30894	0.576484	0.857195	-1.31536	-1.38003		1195	0.552782	6312.81	h/D50	Rep	Cf	0.264148	77.8414	0.0460419	-0.508981	-1.41468	0.19145
1196	0.550353	6365.76	Rep	h/D50	h/D50	0.0783944	7.30894	0.576484	-1.31536	0.857195	-1.38003		1196	0.552782	6312.81	Cf	Rep	h/D50	0.264148	77.8414	0.0460419	0.19145	-1.41468	-0.508981
1197	0.550353	6365.76	h/D50	Rep	Rep	0.157391	2.72291	0.770843	-0.522843	0.788239	-2.1036		1197	0.552782	6312.81	Rep	h/D50	Cf	0.264148	77.8414	0.0460419	-1.41468	-0.508981	0.19145
1198	0.550353	6365.76	Rep	h/D50	Rep	0.157391	2.72291	0.770843	0.788239	-0.522843	-2.1036		1198	0.552782	6312.81	h/D50	Cf	Rep	0.264148	77.8414	0.0460419	-0.508981	0.19145	-1.41468
1199	0.550353	6365.76	Rep	Rep	h/D50	0.157391	2.72291	0.770843	0.788239	-2.1036	-0.522843		1199	0.552782	6312.81	Cf	h/D50	Rep	0.264148	77.8414	0.0460419	0.19145	-0.508981	-1.41468
1200	0.54986	6360.95	h/Kc	Rep (u*_sk D)	Rep (u*D)	39072.1	3.95526e-15	3.76533e+09	-0.359449	3.55352	-5.39116		1200	0.552782	6312.81	Rep	Cf	h/D50	0.264148	77.8414	0.0460419	-1.41468	0.19145	-0.508981
1201	0.54986	6360.95	Rep (u*_sk D)	h/Kc	Rep (u*D)	39072.1	3.95526e-15	3.76533e+09	3.55352	-0.359449	-5.39116		1201	0.551409	6324.48	Rep	Cf	tau	1.73808e-05	1.03506e-07	4.48797e+07	-1.13851	-0.358592	1.01498
1202	0.54986	6360.95	h/Kc	Rep (u*D)	Rep (u*_sk D)	39072.1	3.95526e-15	3.76533e+09	-0.359449	-5.39116	3.55352		1202	0.551409	6324.48	Rep	tau	Cf	1.73808e-05	1.03506e-07	4.48797e+07	-1.13851	1.01498	-0.358592
1203	0.54986	6360.95	Rep (u*D)	h/Kc	Rep (u*_sk D)	39072.1	3.95526e-15	3.76533e+09	-5.39116	-0.359449	3.55352		1203	0.551409	6324.48	Cf	Rep	tau	1.73808e-05	1.03506e-07	4.48797e+07	-0.358592	-1.13851	1.01498
1204	0.54986	6360.95	Rep (u*_sk D)	Rep (u*D)	h/Kc	39072.1	3.95526e-15	3.76533e+09	3.55352	-5.39116	-0.359449		1204	0.551409	6324.48	tau	Rep	Cf	1.73808e-05	1.03506e-07	4.48797e+07	1.01498	-1.13851	-0.358592
1205	0.54986	6360.95	Rep (u*D)	Rep (u*_sk D)	h/Kc	39072.1	3.95526e-15	3.76533e+09	-5.39116	3.55352	-0.359449		1205	0.551409	6324.48	Cf	tau	Rep	1.73808e-05	1.03506e-07	4.48797e+07	-0.358592	1.01498	-1.13851
1206	0.54986	6360.95	Rep (u*D)	Rep (u*_sk D)	Cf	0.0253578	50.9981	43.1833	-5.39115	3.5535	1.07833		1206	0.551409	6324.48	tau	Cf	Rep	1.73808e-05	1.03506e-07	4.48797e+07	1.01498	-0.358592	-1.13851
1207	0.54986	6360.95	Cf	Rep (u*_sk D)	Rep (u*D)	0.0253578	50.9981	43.1833	1.07833	3.5535	-5.39115		1207	0.551409	6324.48	h/Kc	Rep	tau	605.561	0.00152366	0.000399211	0.119528	-1.13852	1.01498
1208	0.54986	6360.95	Cf	Rep (u*D)	Rep (u*_sk D)	0.0253578	50.9981	43.1833	1.07833	-5.39115	3.5535		1208	0.551409	6324.48	Rep	h/Kc	tau	605.561	0.00152366	0.000399211	-1.13852	0.119528	1.01498
1209	0.54986	6360.95	Rep (u*_sk D)	Rep (u*D)	Cf	0.0253578	50.9981	43.1833	3.5535	-5.39115	1.07833		1209	0.551409	6324.48	h/Kc	tau	Rep	605.561	0.00152366	0.000399211	0.119528	1.01498	-1.13852
1210	0.54986	6360.95	Rep (u*_sk D)	Cf	Rep (u*D)	0.0253578	50.9981	43.1833	3.5535	1.07833	-5.39115		1210	0.551409	6324.48	tau	h/Kc	Rep	605.561	0.00152366	0.000399211	1.01498	0.119528	-1.13852
1211	0.54986	6360.95	Rep (u*D)	Cf	Rep (u*_sk D)	0.0253578	50.9981	43.1833	-5.39115	1.07833	3.5535		1211	0.551409	6324.48	Rep	tau	h/Kc	605.561	0.00152366	0.000399211	-1.13852	1.01498	0.119528
1212	0.546819	6470.18	did50	Rep	Cf	2.91751e-05	0.00478239	1667.22	-1.43329	-1.21364	-0.225407		1212	0.551409	6324.48	tau	Rep	h/Kc	605.561	0.00152366	0.000399211	1.01498	-1.13852	0.119528
1213	0.546819	6470.18	Rep	did50	Cf	2.91751e-05	0.00478239	1667.22	-1.21364	-1.43329	-0.225407		1213	0.540147	6357.15	Rep (u*_sk D)	S	u*/ws	0.0899002	9.87207	0.652039	-1.35993	0.696779	0.920846
1214	0.546819	6470.18	did50	Cf	Rep	2.91751e-05	0.00478239	1667.22	-1.43329	-0.225407	-1.21364		1214	0.540147	6357.15	S	Rep (u*_sk D)	u*/ws	0.0899002	9.87207	0.652039	0.696779	-1.35993	0.920846
1215	0.546819	6470.18	Cf	did50	Rep	2.91751e-05	0.00478239	1667.22	-0.225407	-1.43329	-1.21364		1215	0.540147	6357.15	Rep (u*_sk D)	u*/ws	S	0.0899002	9.87207	0.652039	-1.35993	0.920846	0.696779
1216	0.546819	6470.18	Rep	Cf	did50	2.91751e-05	0.00478239	1667.22	-1.21364	-0.225407	-1.43329		1216	0.540147	6357.15	u*/ws	Rep (u*_sk D)	S	0.0899002	9.87207	0.652039	0.920846	-1.35993	0.696779
1217	0.546819	6470.18	Cf	Rep	did50	2.91751e-05	0.00478239	1667.22	-0.225407	-1.21364	-1.43329		1217	0.540147	6357.15	u*/ws	S	Rep (u*_sk D)	0.0899002	9.87207	0.652039	0.920846	0.696779	-1.35993
1218	0.546819	6470.18	did50	h/Kc	Rep	0.0544248	0.00195293	5.68209	-1.43331	0.0751374	-1.21367		1218	0.540147	6357.15	S	u*/ws	Rep (u*_sk D)	0.0899002	9.87207	0.652039	0.696779	0.920846	-1.35993
1219	0.546819	6470.18	h/Kc	did50	Rep	0.0544248	0.00195293	5.68209	0.0751374	-1.43331	-1.21367		1219	0.549649	6357.89	Rep (u*_sk D)	Rep (u*D)	Cf	1.51198	2440.73	0.0181335	3.56266	-5.39814	1.11134
1220	0.546819	6470.18	did50	Rep	h/Kc	0.0544248	0.00195293	5.68209	-1.43331	-1.21367	0.0751374		1220	0.549649	6357.89	Rep (u*D)	Rep (u*_sk D)	Cf	1.51198	2440.73	0.0181335	-5.39814	3.56266	1.11134
1221	0.546819	6470.18	Rep	did50	h/Kc	0.0544248	0.00195293	5.68209	-1.21367	-1.43331	0.0751374		1221	0.549649	6357.89	Rep (u*_sk D)	Cf	Rep (u*D)	1.51198	2440.73	0.0181335	3.56266	1.11134	-5.39814
1222	0.546819	6470.18	h/Kc	Rep	did50	0.0544248	0.00195293	5.68209	0.0751374	-1.21367	-1.43331		1222	0.549649	6357.89	Cf	Rep (u*_sk D)	Rep (u*D)	1.51198	2440.73	0.0181335	1.11134	3.56266	-5.39814
1223	0.546819	6470.18	Rep	h/Kc	did50	0.0544248	0.00195293	5.68209	-1.21367	0.0751374	-1.43331		1223	0.549649	6357.89	Rep (u*D)	Cf	Rep (u*_sk D)	1.51198	2440.73	0.0181335	-5.39814	1.11134	3.56266
1224	0.54501	6459.71	Fr	Fr	Rep	34.23	0.00536962	0.0530059	0.559225	0.560408	-1.01007		1224	0.549649	6357.89	Cf	Rep (u*D)	Rep (u*_sk D)	1.51198	2440.73	0.0181335	1.11134	-5.39814	3.56266
1225	0.54501	6459.71	Fr	Rep	Fr	34.23	0.00536962	0.0530059	0.559225	-1.01007	0.560408		1225	0.550303	6365.03	h/D50	Rep	h/D50	3341.93	0.0972293	0.00100101	-1.88437	-1.30189	1.36181
1226	0.54501	6459.71	Rep	Fr	Fr	34.23	0.00536962	0.0530059	-1.01007	0.559225	0.560408		1226	0.550303	6365.03	Rep	h/D50	h/D50	3341.93	0.0972293	0.00100101	-1.30189	-1.88437	1.36181
1227	0.54501	6459.71	Fr	Rep	Rep	3.50042	0.585581	0.00475289	1.11962	-1.58359	0.573517		1227	0.550303	6365.03	h/D50	h/D50	Rep	3341.93	0.0972293	0.00100101	-1.88437	1.36181	-1.30189
1228	0.54501	6459.71	Rep	Fr	Rep	3.50042	0.585581	0.00475289	-1.58359	1.11962	0.573517		1228	0.550303	6365.03	h/D50	Rep	Rep	0.134921	5.00084	0.482147	-0.522582	0.349258	-1.65115
1229	0.54501	6459.71	Rep	Rep	Fr	3.50042	0.585581	0.00475289	-1.58359	0.573517	1.11962		1229	0.550303	6365.03	Rep	h/D50	Rep	0.134921	5.00084	0.482147	0.349258	-0.522582	-1.65115
1230	0.544614	6485.92	did50	Rep (u*D)	Rep	5.90307e+55	2.95058e-86	3.15566e+26	-1.4551	0.364518	-1.55888		1230	0.550303	6365.03	Rep	Rep	h/D50	0.134921	5.00084	0.482147	0.349258	-1.65115	-0.522582
1231	0.544614	6485.92	Rep (u*D)	did50	Rep	5.90307e+55	2.95058e-86	3.15566e+26	0.364518	-1.4551	-1.55888		1231	0.544402	6409.24	Rep	tau	Rep (u*_sk D)	0.00458785	112.084	0.00113642	-1.44827	0.914877	0.286059
1232	0.544614	6485.92	did50	Rep	Rep (u*D)	5.90307e+55	2.95058e-86	3.15566e+26	-1.4551	-1.55888	0.364518		1232	0.544402	6409.24	tau	Rep	Rep (u*_sk D)	0.00458785	112.084	0.00113642	0.914877	-1.44827	0.286059
1233	0.544614	6485.92	Rep	did50	Rep (u*D)	5.90307e+55	2.95058e-86	3.15566e+26	-1.55888	-1.4551	0.364518		1233	0.544402	6409.24	Rep (u*_sk D)	Rep	tau	0.00458785	112.084	0.00113642	0.286059	-1.44827	0.914877
1234	0.544614	6485.92	Rep (u*D)	Rep	did50	5.90307e+55	2.95058e-86	3.15566e+26	0.364518	-1.55888	-1.4551		1234	0.544402	6409.24	Rep	Rep (u*_sk D)	tau	0.00458785	112.084	0.00113642	-1.44827	0.286059	0.914877
1235	0.544614	6485.92	Rep	Rep (u*D)	did50	5.90307e+55	2.95058e-86	3.15566e+26	-1.55888	0.364518	-1.4551		1235	0.544402	6409.24	Rep (u*_sk D)	tau	Rep	0.00458785	112.084	0.00113642	0.286059	0.914877	-1.44827
1236	0.544483	6410.39	Rep (u*_sk D)	Rep	tau	0.0323918	1.89965	0.00934031	0.29844	-1.4488	0.900176		1236	0.544402	6409.24	tau	Rep (u*_sk D)	Rep	0.00458785	112.084	0.00113642	0.914877	0.286059	-1.44827
1237	0.544483	6410.39	Rep	Rep (u*_sk D)	tau	0.0323918	1.89965	0.00934031	-1.4488	0.29844	0.900176		1237	0.543424	6411.1	Rep (u*D)	u*/ws	tau	6.85159	7.71341e-08	10535	-1.7424	0.397619	0.542483
1238	0.544483	6410.39	Rep (u*_sk D)	tau	Rep	0.0323918	1.89965	0.00934031	0.29844	0.900176	-1.4488		1238	0.543424	6411.1	u*/ws	Rep (u*D)	tau	6.85159	7.71341e-08	10535	0.397619	-1.7424	0.542483
1239	0.544483	6410.39	tau	Rep (u*_sk D)	Rep	0.0323918	1.89965	0.00934031	0.900176	0.29844	-1.4488		1239	0.543424	6411.1	Rep (u*D)	tau	u*/ws	6.85159	7.71341e-08	10535	-1.7424	0.542483	0.397619
1240	0.544483	6410.39	Rep	tau	Rep (u*_sk D)	0.0323918	1.89965	0.00934031	-1.4488	0.900176	0.29844		1240	0.543424	6411.1	tau	Rep (u*D)	u*/ws	6.85159	7.71341e-08	10535	0.542483	-1.7424	0.397619
1241	0.544483	6410.39	tau	Rep	Rep (u*_sk D)	0.0323918	1.89965	0.00934031	0.900176	-1.4488	0.29844		1241	0.543424	6411.1	u*/ws	tau	Rep (u*D)	6.85159	7.71341e-08	10535	0.397619	0.542483	-1.7424
1242	0.543554	6412.95	Rep (u*D)	u*/ws	tau	0.00203363	9.40453e-05	30285.5	-1.74609	0.390501	0.521268		1242	0.543424	6411.1	tau	u*/ws	Rep (u*D)	6.85159	7.71341e-08	10535	0.542483	0.397619	-1.7424
1243	0.543554	6412.95	u*/ws	Rep (u*D)	tau	0.00203363	9.40453e-05	30285.5	0.390501	-1.74609	0.521268		1243	0.540869	6439.96	S	u*/ws	tau	9.77643	56.9492	0.000110841	0.830562	2.07619	-0.796371
1244	0.543554	6412.95	Rep (u*D)	tau	u*/ws	0.00203363	9.40453e-05	30285.5	-1.74609	0.521268	0.390501		1244	0.540869	6439.96	u*/ws	S	tau	9.77643	56.9492	0.000110841	2.07619	0.830562	-0.796371
1245	0.543554	6412.95	tau	Rep (u*D)	u*/ws	0.00203363	9.40453e-05	30285.5	0.521268	-1.74609	0.390501		1245	0.540869	6439.96	S	tau	u*/ws	9.77643	56.9492	0.000110841	0.830562	-0.796371	2.07619
1246	0.543554	6412.95	u*/ws	tau	Rep (u*D)	0.00203363	9.40453e-05	30285.5	0.390501	0.521268	-1.74609		1246	0.540869	6439.96	tau	S	u*/ws	9.77643	56.9492	0.000110841	-0.796371	0.830562	2.07619
1247	0.543554	6412.95	tau	u*/ws	Rep (u*D)	0.00203363	9.40453e-05	30285.5	0.521268	0.390501	-1.74609		1247	0.540869	6439.96	u*/ws	tau	S	9.77643	56.9492	0.000110841	2.07619	-0.796371	0.830562
1248	0.542552	6514.67	did50	did50	Rep	1.27972e+19	1.83452e-10	4.24983e-13	11.5652	-12.882	-1.33789		1248	0.540869	6439.96	tau	u*/ws	S	9.77643	56.9492	0.000110841	-0.796371	2.07619	0.830562
1249	0.542552	6514.67	did50	Rep	did50	1.27972e+19	1.83452e-10	4.24983e-13	11.5652	-1.33789	-12.882		1249	0.544968	6459.1	Fr	Rep	Rep	1.71157	3.22167	0.00174431	1.11538	-1.50514	0.505114
1250	0.542552	6514.67	Rep	did50	did50	1.27972e+19	1.83452e-10	4.24983e-13	-1.33789	11.5652	-12.882		1250	0.544968	6459.1	Rep	Fr	Rep	1.71157	3.22167	0.00174431	-1.50514	1.11538	0.505114
1251	0.542552	6514.67	did50	Rep	Rep	9.52942e+13	0.219592	4.76784e-17	-1.31678	-5.0194	3.68151		1251	0.544968	6459.1	Rep	Rep	Fr	1.71157	3.22167	0.00174431	-1.50514	0.505114	1.11538
1252	0.542552	6514.67	Rep	did50	Rep	9.52942e+13	0.219592	4.76784e-17	-5.0194	-1.31678	3.68151		1252	0.544968	6459.1	Fr	Fr	Rep	24.5539	0.00386355	0.101388	1.29163	-0.176235	-0.999993
1253	0.542552	6514.67	Rep	Rep	did50	9.52942e+13	0.219592	4.76784e-17	-5.0194	3.68151	-1.31678		1253	0.544968	6459.1	Fr	Rep	Fr	24.5539	0.00386355	0.101388	1.29163	-0.999993	-0.176235
1254	0.541374	6353.02	h/D50	Rep (u*_sk D)	u*/ws	43239	7.13647e-06	0.239346	-0.608693	-0.740718	1.30546		1254	0.544968	6459.1	Rep	Fr	Fr	24.5539	0.00386355	0.101388	-0.999993	1.29163	-0.176235
1255	0.541374	6353.02	Rep (u*_sk D)	h/D50	u*/ws	43239	7.13647e-06	0.239346	-0.740718	-0.608693	1.30546		1255	0.540574	6459.11	Rep	tau	tau	3.73413	4.26109e-05	5.31558	-1.33308	3.41995	-2.5429
1256	0.541374	6353.02	h/D50	u*/ws	Rep (u*_sk D)	43239	7.13647e-06	0.239346	-0.608693	1.30546	-0.740718		1256	0.540574	6459.11	tau	Rep	tau	3.73413	4.26109e-05	5.31558	3.41995	-1.33308	-2.5429
1257	0.541374	6353.02	u*/ws	h/D50	Rep (u*_sk D)	43239	7.13647e-06	0.239346	1.30546	-0.608693	-0.740718		1257	0.540574	6459.11	tau	tau	Rep	3.73413	4.26109e-05	5.31558	3.41995	-2.5429	-1.33308
1258	0.541374	6353.02	Rep (u*_sk D)	u*/ws	h/D50	43239	7.13647e-06	0.239346	-0.740718	1.30546	-0.608693		1258	0.540574	6459.11	Rep	Rep	tau	112.507	6.42833e-05	0.116945	-0.0742179	-1.25887	0.877054
1259	0.541374	6353.02	u*/ws	Rep (u*_sk D)	h/D50	43239	7.13647e-06	0.239346	1.30546	-0.740718	-0.608693		1259	0.540574	6459.11	tau	Rep	Rep	112.507	6.42833e-05	0.116945	0.877054	-0.0742179	-1.25887
1260	0.541238	6441.02	tau	S	u*/ws	13.4978	45.6165	0.000102785	-0.824712	0.833108	2.07624		1260	0.540574	6459.11	Rep	tau	Rep	112.507	6.42833e-05	0.116945	-0.0742179	0.877054	-1.25887
1261	0.541238	6441.02	u*/ws	tau	S	13.4978	45.6165	0.000102785	2.07624	-0.824712	0.833108		1261	0.546689	6468.32	did50	Rep	Cf	0.00024159	0.0506721	22.2556	-1.42691	-1.21456	-0.197959
1262	0.541238	6441.02	tau	u*/ws	S	13.4978	45.6165	0.000102785	-0.824712	2.07624	0.833108		1262	0.546689	6468.32	Rep	did50	Cf	0.00024159	0.0506721	22.2556	-1.21456	-1.42691	-0.197959
1263	0.541238	6441.02	S	u*/ws	tau	13.4978	45.6165	0.000102785	0.833108	2.07624	-0.824712		1263	0.546689	6468.32	did50	Cf	Rep	0.00024159	0.0506721	22.2556	-1.42691	-0.197959	-1.21456
1264	0.541238	6441.02	u*/ws	S	tau	13.4978	45.6165	0.000102785	2.07624	0.833108	-0.824712		1264	0.546689	6468.32	Cf	did50	Rep	0.00024159	0.0506721	22.2556	-0.197959	-1.42691	-1.21456
1265	0.541238	6441.02	S	tau	u*/ws	13.4978	45.6165	0.000102785	0.833108	-0.824712	2.07624		1265	0.546689	6468.32	Rep	Cf	did50	0.00024159	0.0506721	22.2556	-1.21456	-0.197959	-1.42691
1266	0.540659	6460.33	Rep	tau	tau	550908	0.000874346	1.76324e-06	-1.32938	0.441249	0.416657		1266	0.546689	6468.32	Cf	Rep	did50	0.00024159	0.0506721	22.2556	-0.197959	-1.21456	-1.42691
1267	0.540659	6460.33	tau	tau	Rep	550908	0.000874346	1.76324e-06	0.441249	0.416657	-1.32938		1267	0.546689	6468.32	did50	Rep	h/Kc	1.78603e+11	2.35416e-14	0.149779	-1.42689	-1.21457	0.0659819
1268	0.540659	6460.33	tau	Rep	tau	550908	0.000874346	1.76324e-06	0.441249	-1.32938	0.416657		1268	0.546689	6468.32	Rep	did50	h/Kc	1.78603e+11	2.35416e-14	0.149779	-1.21457	-1.42689	0.0659819
1269	0.540659	6460.33	Rep	tau	Rep	86.6738	7.96909e-05	0.122963	-0.101052	0.857902	-1.22831		1269	0.546689	6468.32	did50	h/Kc	Rep	1.78603e+11	2.35416e-14	0.149779	-1.42689	0.0659819	-1.21457
1270	0.540659	6460.33	tau	Rep	Rep	86.6738	7.96909e-05	0.122963	0.857902	-0.101052	-1.22831		1270	0.546689	6468.32	h/Kc	did50	Rep	1.78603e+11	2.35416e-14	0.149779	0.0659819	-1.42689	-1.21457
1271	0.539975	6473.06	u*/ws	h/Kc	tau	0.0190537	2.31003	0.000138859	1.15531	0.398557	0.691552		1271	0.546689	6468.32	h/Kc	Rep	did50	1.78603e+11	2.35416e-14	0.149779	0.0659819	-1.21457	-1.42689
1272	0.539975	6473.06	tau	u*/ws	h/Kc	0.0190537	2.31003	0.000138859	0.691552	1.15531	0.398557		1272	0.546689	6468.32	Rep	h/Kc	did50	1.78603e+11	2.35416e-14	0.149779	-1.21457	0.0659819	-1.42689
1273	0.539975	6473.06	h/Kc	u*/ws	tau	0.0190537	2.31003	0.000138859	0.398557	1.15531	0.691552		1273	0.539851	6471.28	Cf	u*/ws	tau	0.0813772	7.30666e-05	0.00579757	-1.21302	1.16079	0.713803
1274	0.539975	6473.06	h/Kc	tau	u*/ws	0.0190537	2.31003	0.000138859	0.398557	0.691552	1.15531		1274	0.539851	6471.28	u*/ws	Cf	tau	0.0813772	7.30666e-05	0.00579757	1.16079	-1.21302	0.713803
1275	0.539975	6473.06	tau	h/Kc	u*/ws	0.0190537	2.31003	0.000138859	0.691552	0.398557	1.15531		1275	0.539851	6471.28	Cf	tau	u*/ws	0.0813772	7.30666e-05	0.00579757	-1.21302	0.713803	1.16079
1276	0.539975	6473.06	u*/ws	tau	h/Kc	0.0190537	2.31003	0.000138859	1.15531	0.691552	0.398557		1276	0.539851	6471.28	tau	Cf	u*/ws	0.0813772	7.30666e-05	0.00579757	0.713803	-1.21302	1.16079
1277	0.539975	6473.06	Cf	u*/ws	tau	0.192109	0.00639503	3.15404e-05	-1.1957	1.15531	0.691563		1277	0.539851	6471.28	u*/ws	tau	Cf	0.0813772	7.30666e-05	0.00579757	1.16079	0.713803	-1.21302
1278	0.539975	6473.06	u*/ws	Cf	tau	0.192109	0.00639503	3.15404e-05	1.15531	-1.1957	0.691563		1278	0.539851	6471.28	tau	u*/ws	Cf	0.0813772	7.30666e-05	0.00579757	0.713803	1.16079	-1.21302
1279	0.539975	6473.06	Cf	tau	u*/ws	0.192109	0.00639503	3.15404e-05	-1.1957	0.691563	1.15531		1279	0.539851	6471.28	h/Kc	u*/ws	tau	0.0329683	2.0117	8.82256e-05	0.40432	1.16078	0.713771
1280	0.539975	6473.06	tau	Cf	u*/ws	0.192109	0.00639503	3.15404e-05	0.691563	-1.1957	1.15531		1280	0.539851	6471.28	u*/ws	h/Kc	tau	0.0329683	2.0117	8.82256e-05	1.16078	0.40432	0.713771
1281	0.539975	6473.06	u*/ws	tau	Cf	0.192109	0.00639503	3.15404e-05	1.15531	0.691563	-1.1957		1281	0.539851	6471.28	h/Kc	tau	u*/ws	0.0329683	2.0117	8.82256e-05	0.40432	0.713771	1.16078
1282	0.539975	6473.06	tau	u*/ws	Cf	0.192109	0.00639503	3.15404e-05	0.691563	1.15531	-1.1957		1282	0.539851	6471.28	tau	h/Kc	u*/ws	0.0329683	2.0117	8.82256e-05	0.713771	0.40432	1.16078
1283	0.539709	6521.29	Rep (u*D)	h/D50	Cf	5.29378	1.26818	0.104775	-1.83717	-0.446161	-0.17374		1283	0.539851	6471.28	u*/ws	tau	h/Kc	0.0329683	2.0117	8.82256e-05	1.16078	0.713771	0.40432
1284	0.539709	6521.29	Rep (u*D)	Cf	h/D50	5.29378	1.26818	0.104775	-1.83717	-0.17374	-0.446161		1284	0.539851	6471.28	tau	u*/ws	h/Kc	0.0329683	2.0117	8.82256e-05	0.713771	1.16078	0.40432
1285	0.539709	6521.29	Cf	Rep (u*D)	h/D50	5.29378	1.26818	0.104775	-0.17374	-1.83717	-0.446161		1285	0.544553	6485.02	did50	Rep (u*D)	Rep	3.88541e-43	1.53482e+44	9.17733e-06	-1.46271	0.357732	-1.54205
1286	0.539709	6521.29	h/D50	Rep (u*D)	Cf	5.29378	1.26818	0.104775	-0.446161	-1.83717	-0.17374		1286	0.544553	6485.02	did50	Rep	Rep (u*D)	3.88541e-43	1.53482e+44	9.17733e-06	-1.46271	-1.54205	0.357732
1287	0.539709	6521.29	h/D50	Cf	Rep (u*D)	5.29378	1.26818	0.104775	-0.446161	-0.17374	-1.83717		1287	0.544553	6485.02	Rep	did50	Rep (u*D)	3.88541e-43	1.53482e+44	9.17733e-06	-1.54205	-1.46271	0.357732
1288	0.539709	6521.29	Cf	h/D50	Rep (u*D)	5.29378	1.26818	0.104775	-0.17374	-0.446161	-1.83717		1288	0.544553	6485.02	Rep (u*D)	Rep	did50	3.88541e-43	1.53482e+44	9.17733e-06	0.357732	-1.54205	-1.46271
1289	0.538701	6376.78	Rep (u*_sk D)	S	u*/ws	0.0756256	13.73	0.98026	-1.4072	0.738489	0.86229		1289	0.544553	6485.02	Rep	Rep (u*D)	did50	3.88541e-43	1.53482e+44	9.17733e-06	-1.54205	0.357732	-1.46271
1290	0.538701	6376.78	S	Rep (u*_sk D)	u*/ws	0.0756256	13.73	0.98026	0.738489	-1.4072	0.86229		1290	0.544553	6485.02	Rep (u*D)	did50	Rep	3.88541e-43	1.53482e+44	9.17733e-06	0.357732	-1.46271	-1.54205
1291	0.538701	6376.78	Rep (u*_sk D)	u*/ws	S	0.0756256	13.73	0.98026	-1.4072	0.86229	0.738489		1291	0.541786	6488.75	h/D50	Rep (u*_sk D)	Rep (u*D)	2.5329e+12	3.20356e-07	1.4712e-06	-0.381816	0.533478	-2.34006
1292	0.538701	6376.78	u*/ws	Rep (u*_sk D)	S	0.0756256	13.73	0.98026	0.86229	-1.4072	0.738489		1292	0.541786	6488.75	Rep (u*_sk D)	h/D50	Rep (u*D)	2.5329e+12	3.20356e-07	1.4712e-06	0.533478	-0.381816	-2.34006
1293	0.538701	6376.78	S	u*/ws	Rep (u*_sk D)	0.0756256	13.73	0.98026	0.738489	0.86229	-1.4072		1293	0.541786	6488.75	h/D50	Rep (u*D)	Rep (u*_sk D)	2.5329e+12	3.20356e-07	1.4712e-06	-0.381816	-2.34006	0.533478
1294	0.538701	6376.78	u*/ws	S	Rep (u*_sk D)	0.0756256	13.73	0.98026	0.86229	0.738489	-1.4072		1294	0.541786	6488.75	Rep (u*D)	h/D50	Rep (u*_sk D)	2.5329e+12	3.20356e-07	1.4712e-06	-2.34006	-0.381816	0.533478
1295	0.536678	6721.91	did50	Fr	tau_sk	142.245	0.00371375	0.0067696	-0.910357	1.18963	0.83897		1295	0.541786	6488.75	Rep (u*_sk D)	Rep (u*D)	h/D50	2.5329e+12	3.20356e-07	1.4712e-06	0.533478	-2.34006	-0.381816
1296	0.536678	6721.91	Fr	did50	tau_sk	142.245	0.00371375	0.0067696	1.18963	-0.910357	0.83897		1296	0.541786	6488.75	Rep (u*D)	Rep (u*_sk D)	h/D50	2.5329e+12	3.20356e-07	1.4712e-06	-2.34006	0.533478	-0.381816
1297	0.536678	6721.91	did50	tau_sk	Fr	142.245	0.00371375	0.0067696	-0.910357	0.83897	1.18963		1297	0.542564	6512.09	did50	Rep	u*/ws	1804.91	1.45782e-08	32.3132	-1.22307	-1.28901	0.0867102
1298	0.536678	6721.91	tau_sk	did50	Fr	142.245	0.00371375	0.0067696	0.83897	-0.910357	1.18963		1298	0.542564	6512.09	Rep	did50	u*/ws	1804.91	1.45782e-08	32.3132	-1.28901	-1.22307	0.0867102
1299	0.536678	6721.91	Fr	tau_sk	did50	142.245	0.00371375	0.0067696	1.18963	0.83897	-0.910357		1299	0.542564	6512.09	did50	u*/ws	Rep	1804.91	1.45782e-08	32.3132	-1.22307	0.0867102	-1.28901
1300	0.536678	6721.91	tau_sk	Fr	did50	142.245	0.00371375	0.0067696	0.83897	1.18963	-0.910357		1300	0.542564	6512.09	u*/ws	did50	Rep	1804.91	1.45782e-08	32.3132	0.0867102	-1.22307	-1.28901
1301	0.536658	6504.89	h/D50	Rep	Cf	0.214077	22.9796	2.54511	-0.568269	-1.6126	0.500052		1301	0.542564	6512.09	Rep	u*/ws	did50	1804.91	1.45782e-08	32.3132	-1.28901	0.0867102	-1.22307
1302	0.536658	6504.89	Rep	h/D50	Cf	0.214077	22.9796	2.54511	-1.6126	-0.568269	0.500052		1302	0.542564	6512.09	u*/ws	Rep	did50	1804.91	1.45782e-08	32.3132	0.0867102	-1.28901	-1.22307
1303	0.536658	6504.89	h/D50	Cf	Rep	0.214077	22.9796	2.54511	-0.568269	0.500052	-1.6126		1303	0.542486	6513.69	Rep	did50	did50	3.08068e+17	1.26581e-05	2.51186e-16	-1.32424	9.84695	-11.1738
1304	0.536658	6504.89	Cf	h/D50	Rep	0.214077	22.9796	2.54511	0.500052	-0.568269	-1.6126		1304	0.542486	6513.69	did50	did50	Rep	3.08068e+17	1.26581e-05	2.51186e-16	9.84695	-11.1738	-1.32424
1305	0.536658	6504.89	Rep	Cf	h/D50	0.214077	22.9796	2.54511	-1.6126	0.500052	-0.568269		1305	0.542486	6513.69	did50	Rep	did50	3.08068e+17	1.26581e-05	2.51186e-16	9.84695	-1.32424	-11.1738
1306	0.536658	6504.89	Cf	Rep	h/D50	0.214077	22.9796	2.54511	0.500052	-1.6126	-0.568269		1306	0.542486	6513.69	did50	Rep	Rep	2117735461192091	0.000608387	7.60253e-16	-1.3268	-7.56076	6.23653
1307	0.536565	6583.86	h/D50	Rep (u*D)	h/Kc	1.51398	7.0272	0.118592	-0.471822	-1.74382	0.108504		1307	0.542486	6513.69	Rep	did50	Rep	2117735461192091	0.000608387	7.60253e-16	-7.56076	-1.3268	6.23653
1308	0.536565	6583.86	h/Kc	h/D50	Rep (u*D)	1.51398	7.0272	0.118592	0.108504	-0.471822	-1.74382		1308	0.542486	6513.69	Rep	Rep	did50	2117735461192091	0.000608387	7.60253e-16	-7.56076	6.23653	-1.3268
1309	0.536565	6583.86	h/D50	h/Kc	Rep (u*D)	1.51398	7.0272	0.118592	-0.471822	0.108504	-1.74382		1309	0.539514	6518.49	h/D50	Rep (u*D)	Cf	15764	0.000202936	0.259031	-0.44488	-1.84133	-0.142585
1310	0.536565	6583.86	h/Kc	Rep (u*D)	h/D50	1.51398	7.0272	0.118592	0.108504	-1.74382	-0.471822		1310	0.539514	6518.49	Rep (u*D)	h/D50	Cf	15764	0.000202936	0.259031	-1.84133	-0.44488	-0.142585
1311	0.536565	6583.86	Rep (u*D)	h/Kc	h/D50	1.51398	7.0272	0.118592	-1.74382	0.108504	-0.471822		1311	0.539514	6518.49	Cf	h/D50	Rep (u*D)	15764	0.000202936	0.259031	-0.142585	-0.44488	-1.84133
1312	0.536565	6583.86	Rep (u*D)	h/D50	h/Kc	1.51398	7.0272	0.118592	-1.74382	-0.471822	0.108504		1312	0.539514	6518.49	h/D50	Cf	Rep (u*D)	15764	0.000202936	0.259031	-0.44488	-0.142585	-1.84133
1313	0.535682	6556.76	h/D50	h/D50	Rep (u*D)	12.188	49.1115	0.00332183	1.60937	-2.03416	-1.96402		1313	0.539514	6518.49	Rep (u*D)	Cf	h/D50	15764	0.000202936	0.259031	-1.84133	-0.142585	-0.44488
1314	0.535682	6556.76	h/D50	Rep (u*D)	h/D50	12.188	49.1115	0.00332183	1.60937	-1.96402	-2.03416		1314	0.539514	6518.49	Cf	Rep (u*D)	h/D50	15764	0.000202936	0.259031	-0.142585	-1.84133	-0.44488
1315	0.535682	6556.76	Rep (u*D)	h/D50	h/D50	12.188	49.1115	0.00332183	-1.96402	1.60937	-2.03416		1315	0.539514	6518.49	h/Kc	h/D50	Rep (u*D)	1.84044	1.07206	0.768008	0.0475211	-0.444884	-1.84134
1316	0.535679	6556.76	h/D50	Rep (u*D)	Rep (u*D)	0.461263	2.30283	1.82818	-0.422962	-0.908572	-1.05327		1316	0.539514	6518.49	h/Kc	Rep (u*D)	h/D50	1.84044	1.07206	0.768008	0.0475211	-1.84134	-0.444884
1317	0.535679	6556.76	Rep (u*D)	h/D50	Rep (u*D)	0.461263	2.30283	1.82818	-0.908572	-0.422962	-1.05327		1317	0.539514	6518.49	Rep (u*D)	h/Kc	h/D50	1.84044	1.07206	0.768008	-1.84134	0.0475211	-0.444884
1318	0.535679	6556.76	Rep (u*D)	Rep (u*D)	h/D50	0.461263	2.30283	1.82818	-0.908572	-1.05327	-0.422962		1318	0.539514	6518.49	h/D50	Rep (u*D)	h/Kc	1.84044	1.07206	0.768008	-0.444884	-1.84134	0.0475211
1319	0.534579	6640.51	Rep	Cf	u*/ws	21.6739	0.000478969	0.00274525	-0.720774	-0.273623	1.11309		1319	0.539514	6518.49	Rep (u*D)	h/D50	h/Kc	1.84044	1.07206	0.768008	-1.84134	-0.444884	0.0475211
1320	0.534579	6640.51	Cf	Rep	u*/ws	21.6739	0.000478969	0.00274525	-0.273623	-0.720774	1.11309		1320	0.539514	6518.49	h/D50	h/Kc	Rep (u*D)	1.84044	1.07206	0.768008	-0.444884	0.0475211	-1.84134
1321	0.534579	6640.51	Cf	u*/ws	Rep	21.6739	0.000478969	0.00274525	-0.273623	1.11309	-0.720774		1321	0.535624	6555.88	Rep (u*D)	Rep (u*D)	h/D50	0.00767873	50.9971	5.0426	0.227756	-2.17552	-0.428355
1322	0.534579	6640.51	u*/ws	Cf	Rep	21.6739	0.000478969	0.00274525	1.11309	-0.273623	-0.720774		1322	0.535624	6555.88	h/D50	Rep (u*D)	Rep (u*D)	0.00767873	50.9971	5.0426	-0.428355	0.227756	-2.17552
1323	0.534579	6640.51	Rep	u*/ws	Cf	21.6739	0.000478969	0.00274525	-0.720774	1.11309	-0.273623		1323	0.535624	6555.88	Rep (u*D)	h/D50	Rep (u*D)	0.00767873	50.9971	5.0426	0.227756	-0.428355	-2.17552
1324	0.534579	6640.51	u*/ws	Rep	Cf	21.6739	0.000478969	0.00274525	1.11309	-0.720774	-0.273623		1324	0.535624	6555.88	h/D50	h/D50	Rep (u*D)	9.52108	274.422	0.000755665	1.30974	-1.73808	-1.94777
1325	0.534579	6640.52	h/Kc	Rep	u*/ws	0.151478	171.46	3.49363e-06	0.0912107	-0.720795	1.1131		1325	0.535624	6555.88	h/D50	Rep (u*D)	h/D50	9.52108	274.422	0.000755665	1.30974	-1.94777	-1.73808
1326	0.534579	6640.52	h/Kc	u*/ws	Rep	0.151478	171.46	3.49363e-06	0.0912107	1.1131	-0.720795		1326	0.535624	6555.88	Rep (u*D)	h/D50	h/D50	9.52108	274.422	0.000755665	-1.94777	1.30974	-1.73808
1327	0.534579	6640.52	u*/ws	h/Kc	Rep	0.151478	171.46	3.49363e-06	1.1131	0.0912107	-0.720795		1327	0.533657	6565.82	did50	Rep (u*D)	tau	9.63414e-12	7.41069e+09	0.24148	0.132867	-2.02194	0.775482
1328	0.534579	6640.52	Rep	u*/ws	h/Kc	0.151478	171.46	3.49363e-06	-0.720795	1.1131	0.0912107		1328	0.533657	6565.82	Rep (u*D)	did50	tau	9.63414e-12	7.41069e+09	0.24148	-2.02194	0.132867	0.775482
1329	0.534579	6640.52	Rep	h/Kc	u*/ws	0.151478	171.46	3.49363e-06	-0.720795	0.0912107	1.1131		1329	0.533657	6565.82	did50	tau	Rep (u*D)	9.63414e-12	7.41069e+09	0.24148	0.132867	0.775482	-2.02194
1330	0.534579	6640.52	u*/ws	Rep	h/Kc	0.151478	171.46	3.49363e-06	1.1131	-0.720795	0.0912107		1330	0.533657	6565.82	tau	did50	Rep (u*D)	9.63414e-12	7.41069e+09	0.24148	0.775482	0.132867	-2.02194
1331	0.533733	6566.9	did50	Rep (u*D)	tau	4.84733e-10	4.79428e+09	0.00758065	0.147074	-2.02307	0.763895		1331	0.533657	6565.82	tau	Rep (u*D)	did50	9.63414e-12	7.41069e+09	0.24148	0.775482	-2.02194	0.132867
1332	0.533733	6566.9	Rep (u*D)	did50	tau	4.84733e-10	4.79428e+09	0.00758065	-2.02307	0.147074	0.763895		1332	0.533657	6565.82	Rep (u*D)	tau	did50	9.63414e-12	7.41069e+09	0.24148	-2.02194	0.775482	0.132867
1333	0.533733	6566.9	did50	tau	Rep (u*D)	4.84733e-10	4.79428e+09	0.00758065	0.147074	0.763895	-2.02307		1333	0.532451	6580.06	Rep (u*D)	tau	Rep (u*D)	29465.1	2699.17	2.0329e-10	-1.62944	0.725662	-0.368448
1334	0.533733	6566.9	tau	did50	Rep (u*D)	4.84733e-10	4.79428e+09	0.00758065	0.763895	0.147074	-2.02307		1334	0.532451	6580.06	tau	Rep (u*D)	Rep (u*D)	29465.1	2699.17	2.0329e-10	0.725662	-1.62944	-0.368448
1335	0.533733	6566.9	Rep (u*D)	tau	did50	4.84733e-10	4.79428e+09	0.00758065	-2.02307	0.763895	0.147074		1335	0.532451	6580.06	Rep (u*D)	Rep (u*D)	tau	29465.1	2699.17	2.0329e-10	-1.62944	-0.368448	0.725662
1336	0.533733	6566.9	tau	Rep (u*D)	did50	4.84733e-10	4.79428e+09	0.00758065	0.763895	-2.02307	0.147074		1336	0.532451	6580.06	Rep (u*D)	tau	tau	4.48231e+06	4.1883e-05	8.61181e-05	-1.99787	3.2389	-2.51325
1337	0.532524	6581.1	Rep (u*D)	tau	Rep (u*D)	0.0148428	33491.6	3.3014e-05	1.64787	0.707521	-3.64397		1337	0.532451	6580.06	tau	Rep (u*D)	tau	4.48231e+06	4.1883e-05	8.61181e-05	3.2389	-1.99787	-2.51325
1338	0.532524	6581.1	tau	Rep (u*D)	Rep (u*D)	0.0148428	33491.6	3.3014e-05	0.707521	1.64787	-3.64397		1338	0.532451	6580.06	tau	tau	Rep (u*D)	4.48231e+06	4.1883e-05	8.61181e-05	3.2389	-2.51325	-1.99787
1339	0.532524	6581.1	Rep (u*D)	tau	tau	5.77397e+06	5.58445e-05	5.0897e-05	-1.9961	3.53906	-2.83154		1339	0.525314	6599.73	h/D50	S	u*/ws	0.745739	1.03532	0.00993273	-0.993026	-0.445216	1.76959
1340	0.532524	6581.1	tau	Rep (u*D)	tau	5.77397e+06	5.58445e-05	5.0897e-05	3.53906	-1.9961	-2.83154		1340	0.525314	6599.73	S	h/D50	u*/ws	0.745739	1.03532	0.00993273	-0.445216	-0.993026	1.76959
1341	0.532524	6581.1	tau	tau	Rep (u*D)	5.77397e+06	5.58445e-05	5.0897e-05	3.53906	-2.83154	-1.9961		1341	0.525314	6599.73	h/D50	u*/ws	S	0.745739	1.03532	0.00993273	-0.993026	1.76959	-0.445216
1342	0.530582	6661.03	Cf	h/D50	Rep (u*_sk D)	0.877146	11.7787	0.00662132	-0.82597	-0.67882	-1.79902		1342	0.525314	6599.73	u*/ws	h/D50	S	0.745739	1.03532	0.00993273	1.76959	-0.993026	-0.445216
1343	0.530582	6661.03	h/D50	Rep (u*_sk D)	Cf	0.877146	11.7787	0.00662132	-0.67882	-1.79902	-0.82597		1343	0.525314	6599.73	S	u*/ws	h/D50	0.745739	1.03532	0.00993273	-0.445216	1.76959	-0.993026
1344	0.530582	6661.03	Rep (u*_sk D)	h/D50	Cf	0.877146	11.7787	0.00662132	-1.79902	-0.67882	-0.82597		1344	0.525314	6599.73	u*/ws	S	h/D50	0.745739	1.03532	0.00993273	1.76959	-0.445216	-0.993026
1345	0.530582	6661.03	h/D50	Cf	Rep (u*_sk D)	0.877146	11.7787	0.00662132	-0.67882	-0.82597	-1.79902		1345	0.533979	6627.38	Rep (u*D)	Rep	u*/ws	0.000712882	0.000840196	1434.29	-0.800337	-0.474977	0.869391
1346	0.530582	6661.03	Rep (u*_sk D)	Cf	h/D50	0.877146	11.7787	0.00662132	-1.79902	-0.82597	-0.67882		1346	0.533979	6627.38	Rep (u*D)	u*/ws	Rep	0.000712882	0.000840196	1434.29	-0.800337	0.869391	-0.474977
1347	0.530582	6661.03	Cf	Rep (u*_sk D)	h/D50	0.877146	11.7787	0.00662132	-0.82597	-1.79902	-0.67882		1347	0.533979	6627.38	u*/ws	Rep (u*D)	Rep	0.000712882	0.000840196	1434.29	0.869391	-0.800337	-0.474977
1348	0.530582	6661.02	h/Kc	h/D50	Rep (u*_sk D)	0.518466	13.9759	0.311364	0.275311	-0.67881	-1.79904		1348	0.533979	6627.38	Rep	u*/ws	Rep (u*D)	0.000712882	0.000840196	1434.29	-0.474977	0.869391	-0.800337
1349	0.530582	6661.02	h/D50	h/Kc	Rep (u*_sk D)	0.518466	13.9759	0.311364	-0.67881	0.275311	-1.79904		1349	0.533979	6627.38	Rep	Rep (u*D)	u*/ws	0.000712882	0.000840196	1434.29	-0.474977	-0.800337	0.869391
1350	0.530582	6661.02	h/Kc	Rep (u*_sk D)	h/D50	0.518466	13.9759	0.311364	0.275311	-1.79904	-0.67881		1350	0.533979	6627.38	u*/ws	Rep	Rep (u*D)	0.000712882	0.000840196	1434.29	0.869391	-0.474977	-0.800337
1351	0.530582	6661.02	Rep (u*_sk D)	h/Kc	h/D50	0.518466	13.9759	0.311364	-1.79904	0.275311	-0.67881		1351	0.534494	6639.29	Rep	u*/ws	Cf	57.8771	9.34843e-05	0.00587639	-0.718799	1.11038	-0.255626
1352	0.530582	6661.02	h/D50	Rep (u*_sk D)	h/Kc	0.518466	13.9759	0.311364	-0.67881	-1.79904	0.275311		1352	0.534494	6639.29	u*/ws	Rep	Cf	57.8771	9.34843e-05	0.00587639	1.11038	-0.718799	-0.255626
1353	0.530582	6661.02	Rep (u*_sk D)	h/D50	h/Kc	0.518466	13.9759	0.311364	-1.79904	-0.67881	0.275311		1353	0.534494	6639.29	Cf	u*/ws	Rep	57.8771	9.34843e-05	0.00587639	-0.255626	1.11038	-0.718799
1354	0.530561	6643.25	h/Kc	h/D50	Rep	0.141506	2.76684	8.40318	-0.0530179	-0.7047	-1.48204		1354	0.534494	6639.29	u*/ws	Cf	Rep	57.8771	9.34843e-05	0.00587639	1.11038	-0.255626	-0.718799
1355	0.530561	6643.25	h/D50	h/Kc	Rep	0.141506	2.76684	8.40318	-0.7047	-0.0530179	-1.48204		1355	0.534494	6639.29	Rep	Cf	u*/ws	57.8771	9.34843e-05	0.00587639	-0.718799	-0.255626	1.11038
1356	0.530561	6643.25	h/Kc	Rep	h/D50	0.141506	2.76684	8.40318	-0.0530179	-1.48204	-0.7047		1356	0.534494	6639.29	Cf	Rep	u*/ws	57.8771	9.34843e-05	0.00587639	-0.255626	-0.718799	1.11038
1357	0.530561	6643.25	Rep	h/Kc	h/D50	0.141506	2.76684	8.40318	-1.48204	-0.0530179	-0.7047		1357	0.534494	6639.29	Rep	h/Kc	u*/ws	5.10165	3.2655	5.63045e-06	-0.71879	0.0852169	1.1104
1358	0.530561	6643.25	h/D50	Rep	h/Kc	0.141506	2.76684	8.40318	-0.7047	-1.48204	-0.0530179		1358	0.534494	6639.29	h/Kc	u*/ws	Rep	5.10165	3.2655	5.63045e-06	0.0852169	1.1104	-0.71879
1359	0.530561	6643.25	Rep	h/D50	h/Kc	0.141506	2.76684	8.40318	-1.48204	-0.7047	-0.0530179		1359	0.534494	6639.29	u*/ws	h/Kc	Rep	5.10165	3.2655	5.63045e-06	1.1104	0.0852169	-0.71879
1360	0.53006	6702.77	Rep (u*D)	Cf	u*/ws	30.2194	1.73385e-05	0.0876737	-0.976214	-0.437357	1.05925		1360	0.534494	6639.29	Rep	u*/ws	h/Kc	5.10165	3.2655	5.63045e-06	-0.71879	1.1104	0.0852169
1361	0.53006	6702.77	Cf	Rep (u*D)	u*/ws	30.2194	1.73385e-05	0.0876737	-0.437357	-0.976214	1.05925		1361	0.534494	6639.29	u*/ws	Rep	h/Kc	5.10165	3.2655	5.63045e-06	1.1104	-0.71879	0.0852169
1362	0.53006	6702.77	Rep (u*D)	u*/ws	Cf	30.2194	1.73385e-05	0.0876737	-0.976214	1.05925	-0.437357		1362	0.534494	6639.29	h/Kc	Rep	u*/ws	5.10165	3.2655	5.63045e-06	0.0852169	-0.71879	1.1104
1363	0.53006	6702.77	u*/ws	Rep (u*D)	Cf	30.2194	1.73385e-05	0.0876737	1.05925	-0.976214	-0.437357		1363	0.530407	6658.51	h/D50	Rep (u*_sk D)	Cf	221.888	0.00106614	0.334503	-0.677805	-1.80375	-0.798191
1364	0.53006	6702.77	Cf	u*/ws	Rep (u*D)	30.2194	1.73385e-05	0.0876737	-0.437357	1.05925	-0.976214		1364	0.530407	6658.51	Rep (u*_sk D)	h/D50	Cf	221.888	0.00106614	0.334503	-1.80375	-0.677805	-0.798191
1365	0.53006	6702.77	u*/ws	Cf	Rep (u*D)	30.2194	1.73385e-05	0.0876737	1.05925	-0.437357	-0.976214		1365	0.530407	6658.51	h/D50	Cf	Rep (u*_sk D)	221.888	0.00106614	0.334503	-0.677805	-0.798191	-1.80375
1366	0.53006	6702.77	h/Kc	Rep (u*D)	u*/ws	0.00478192	2.70421e-07	226201	0.14578	-0.976243	1.05924		1366	0.530407	6658.51	Cf	h/D50	Rep (u*_sk D)	221.888	0.00106614	0.334503	-0.798191	-0.677805	-1.80375
1367	0.53006	6702.77	Rep (u*D)	h/Kc	u*/ws	0.00478192	2.70421e-07	226201	-0.976243	0.14578	1.05924		1367	0.530407	6658.51	Rep (u*_sk D)	Cf	h/D50	221.888	0.00106614	0.334503	-1.80375	-0.798191	-0.677805
1368	0.53006	6702.77	h/Kc	u*/ws	Rep (u*D)	0.00478192	2.70421e-07	226201	0.14578	1.05924	-0.976243		1368	0.530407	6658.51	Cf	Rep (u*_sk D)	h/D50	221.888	0.00106614	0.334503	-0.798191	-1.80375	-0.677805
1369	0.53006	6702.77	u*/ws	h/Kc	Rep (u*D)	0.00478192	2.70421e-07	226201	1.05924	0.14578	-0.976243		1369	0.530403	6658.51	h/D50	h/Kc	Rep (u*_sk D)	1.9706e-09	344135	3408.78	-0.67745	0.265885	-1.80303
1370	0.53006	6702.77	Rep (u*D)	u*/ws	h/Kc	0.00478192	2.70421e-07	226201	-0.976243	1.05924	0.14578		1370	0.530403	6658.51	h/Kc	h/D50	Rep (u*_sk D)	1.9706e-09	344135	3408.78	0.265885	-0.67745	-1.80303
1371	0.53006	6702.77	u*/ws	Rep (u*D)	h/Kc	0.00478192	2.70421e-07	226201	1.05924	-0.976243	0.14578		1371	0.530403	6658.51	h/Kc	Rep (u*_sk D)	h/D50	1.9706e-09	344135	3408.78	0.265885	-1.80303	-0.67745
1372	0.529084	6696.44	Rep (u*D)	Rep	u*/ws	0.00748626	0.00166346	112.721	-1.06749	-0.334387	0.828829		1372	0.530403	6658.51	Rep (u*_sk D)	h/Kc	h/D50	1.9706e-09	344135	3408.78	-1.80303	0.265885	-0.67745
1373	0.529084	6696.44	Rep	Rep (u*D)	u*/ws	0.00748626	0.00166346	112.721	-0.334387	-1.06749	0.828829		1373	0.530403	6658.51	h/D50	Rep (u*_sk D)	h/Kc	1.9706e-09	344135	3408.78	-0.67745	-1.80303	0.265885
1374	0.529084	6696.44	Rep (u*D)	u*/ws	Rep	0.00748626	0.00166346	112.721	-1.06749	0.828829	-0.334387		1374	0.530403	6658.51	Rep (u*_sk D)	h/D50	h/Kc	1.9706e-09	344135	3408.78	-1.80303	-0.67745	0.265885
1375	0.529084	6696.44	u*/ws	Rep (u*D)	Rep	0.00748626	0.00166346	112.721	0.828829	-1.06749	-0.334387		1375	0.525643	6691.44	u*/ws	u*/ws	tau_sk	0.828844	0.000731812	0.2402	1.02702	-0.165998	1.1876
1376	0.529084	6696.44	Rep	u*/ws	Rep (u*D)	0.00748626	0.00166346	112.721	-0.334387	0.828829	-1.06749		1376	0.525643	6691.44	u*/ws	tau_sk	u*/ws	0.828844	0.000731812	0.2402	1.02702	1.1876	-0.165998
1377	0.529084	6696.44	u*/ws	Rep	Rep (u*D)	0.00748626	0.00166346	112.721	0.828829	-0.334387	-1.06749		1377	0.525643	6691.44	tau_sk	u*/ws	u*/ws	0.828844	0.000731812	0.2402	1.1876	1.02702	-0.165998
1378	0.528652	6711.08	Rep	u*/ws	u*/ws	0.172064	0.118125	0.0100581	-0.921098	1.11836	-0.128097		1378	0.525643	6691.44	u*/ws	tau_sk	tau_sk	62.0525	0.0101688	0.000230899	0.861017	2.97844	-1.79083
1379	0.528652	6711.08	u*/ws	Rep	u*/ws	0.172064	0.118125	0.0100581	1.11836	-0.921098	-0.128097		1379	0.525643	6691.44	tau_sk	u*/ws	tau_sk	62.0525	0.0101688	0.000230899	2.97844	0.861017	-1.79083
1380	0.528652	6711.08	u*/ws	u*/ws	Rep	0.172064	0.118125	0.0100581	1.11836	-0.128097	-0.921098		1380	0.525643	6691.44	tau_sk	tau_sk	u*/ws	62.0525	0.0101688	0.000230899	2.97844	-1.79083	0.861017
1381	0.528652	6711.09	Rep	Rep	u*/ws	1.2705	0.011552	0.0139301	-1.66539	0.744258	0.990235		1381	0.529971	6701.5	Rep (u*D)	Cf	u*/ws	3.07361	0.000577128	0.0287816	-0.973496	-0.417889	1.05801
1382	0.528652	6711.09	u*/ws	Rep	Rep	1.2705	0.011552	0.0139301	0.990235	-1.66539	0.744258		1382	0.529971	6701.5	Cf	Rep (u*D)	u*/ws	3.07361	0.000577128	0.0287816	-0.417889	-0.973496	1.05801
1383	0.528652	6711.09	Rep	u*/ws	Rep	1.2705	0.011552	0.0139301	-1.66539	0.990235	0.744258		1383	0.529971	6701.5	Rep (u*D)	u*/ws	Cf	3.07361	0.000577128	0.0287816	-0.973496	1.05801	-0.417889
1384	0.526959	6724.15	did50	tau_sk	Cf	218.659	105.038	2.52396e-10	-0.841109	1.21141	-0.763051		1384	0.529971	6701.5	u*/ws	Rep (u*D)	Cf	3.07361	0.000577128	0.0287816	1.05801	-0.973496	-0.417889
1385	0.526959	6724.15	tau_sk	did50	Cf	218.659	105.038	2.52396e-10	1.21141	-0.841109	-0.763051		1385	0.529971	6701.5	Cf	u*/ws	Rep (u*D)	3.07361	0.000577128	0.0287816	-0.417889	1.05801	-0.973496
1386	0.526959	6724.15	tau_sk	Cf	did50	218.659	105.038	2.52396e-10	1.21141	-0.763051	-0.841109		1386	0.529971	6701.5	u*/ws	Cf	Rep (u*D)	3.07361	0.000577128	0.0287816	1.05801	-0.417889	-0.973496
1387	0.526959	6724.15	did50	Cf	tau_sk	218.659	105.038	2.52396e-10	-0.841109	-0.763051	1.21141		1387	0.529971	6701.5	Rep (u*D)	u*/ws	h/Kc	0.00514601	0.00100437	57.9149	-0.973481	1.05802	0.139298
1388	0.526959	6724.15	Cf	did50	tau_sk	218.659	105.038	2.52396e-10	-0.763051	-0.841109	1.21141		1388	0.529971	6701.5	h/Kc	Rep (u*D)	u*/ws	0.00514601	0.00100437	57.9149	0.139298	-0.973481	1.05802
1389	0.526959	6724.15	Cf	tau_sk	did50	218.659	105.038	2.52396e-10	-0.763051	1.21141	-0.841109		1389	0.529971	6701.5	Rep (u*D)	h/Kc	u*/ws	0.00514601	0.00100437	57.9149	-0.973481	0.139298	1.05802
1390	0.526959	6724.15	did50	h/Kc	tau_sk	6.31374e-06	3.62775	6.39543	-0.841126	0.254354	1.21141		1390	0.529971	6701.5	h/Kc	u*/ws	Rep (u*D)	0.00514601	0.00100437	57.9149	0.139298	1.05802	-0.973481
1391	0.526959	6724.15	h/Kc	did50	tau_sk	6.31374e-06	3.62775	6.39543	0.254354	-0.841126	1.21141		1391	0.529971	6701.5	u*/ws	h/Kc	Rep (u*D)	0.00514601	0.00100437	57.9149	1.05802	0.139298	-0.973481
1392	0.526959	6724.15	did50	tau_sk	h/Kc	6.31374e-06	3.62775	6.39543	-0.841126	1.21141	0.254354		1392	0.529971	6701.5	u*/ws	Rep (u*D)	h/Kc	0.00514601	0.00100437	57.9149	1.05802	-0.973481	0.139298
1393	0.526959	6724.15	tau_sk	did50	h/Kc	6.31374e-06	3.62775	6.39543	1.21141	-0.841126	0.254354		1393	0.528589	6710.18	u*/ws	Rep	u*/ws	0.164637	0.156718	0.00775362	1.14306	-0.90584	-0.14606
1394	0.526959	6724.15	h/Kc	tau_sk	did50	6.31374e-06	3.62775	6.39543	0.254354	1.21141	-0.841126		1394	0.528589	6710.18	u*/ws	u*/ws	Rep	0.164637	0.156718	0.00775362	1.14306	-0.14606	-0.90584
1395	0.526959	6724.15	tau_sk	h/Kc	did50	6.31374e-06	3.62775	6.39543	1.21141	0.254354	-0.841126		1395	0.528589	6710.18	Rep	u*/ws	u*/ws	0.164637	0.156718	0.00775362	-0.90584	1.14306	-0.14606
1396	0.526174	6729.12	Fr	h/D50	Rep	5.23441	0.0291681	0.0717724	1.54704	0.052707	-0.848065		1396	0.528589	6710.18	Rep	Rep	u*/ws	1.60346	0.0082625	0.0151013	-1.69383	0.787975	0.996991
1397	0.526174	6729.12	h/D50	Fr	Rep	5.23441	0.0291681	0.0717724	0.052707	1.54704	-0.848065		1397	0.528589	6710.18	Rep	u*/ws	Rep	1.60346	0.0082625	0.0151013	-1.69383	0.996991	0.787975
1398	0.526174	6729.12	Fr	Rep	h/D50	5.23441	0.0291681	0.0717724	1.54704	-0.848065	0.052707		1398	0.528589	6710.18	u*/ws	Rep	Rep	1.60346	0.0082625	0.0151013	0.996991	-1.69383	0.787975
1399	0.526174	6729.12	Rep	Fr	h/D50	5.23441	0.0291681	0.0717724	-0.848065	1.54704	0.052707		1399	0.536283	6716.1	did50	Fr	tau_sk	0.879041	1.89619	0.00217925	-0.962242	1.20849	0.786465
1400	0.526174	6729.12	h/D50	Rep	Fr	5.23441	0.0291681	0.0717724	0.052707	-0.848065	1.54704		1400	0.536283	6716.1	Fr	did50	tau_sk	0.879041	1.89619	0.00217925	1.20849	-0.962242	0.786465
1401	0.526174	6729.12	Rep	h/D50	Fr	5.23441	0.0291681	0.0717724	-0.848065	0.052707	1.54704		1401	0.536283	6716.1	did50	tau_sk	Fr	0.879041	1.89619	0.00217925	-0.962242	0.786465	1.20849
1402	0.526165	6699.22	u*/ws	tau_sk	tau_sk	480.652	0.00431814	7.77132e-05	0.798731	3.26794	-2.04567		1402	0.536283	6716.1	tau_sk	did50	Fr	0.879041	1.89619	0.00217925	0.786465	-0.962242	1.20849
1403	0.526165	6699.22	tau_sk	u*/ws	tau_sk	480.652	0.00431814	7.77132e-05	3.26794	0.798731	-2.04567		1403	0.536283	6716.1	Fr	tau_sk	did50	0.879041	1.89619	0.00217925	1.20849	0.786465	-0.962242
1404	0.526165	6699.22	tau_sk	tau_sk	u*/ws	480.652	0.00431814	7.77132e-05	3.26794	-2.04567	0.798731		1404	0.536283	6716.1	tau_sk	Fr	did50	0.879041	1.89619	0.00217925	0.786465	1.20849	-0.962242
1405	0.526165	6699.22	u*/ws	u*/ws	tau_sk	0.784375	0.000712424	0.288638	1.00314	-0.204404	1.22226		1405	0.526632	6719.16	did50	h/Kc	tau_sk	2.71669e+12	2.73093e+20	1.79173e-37	-0.903308	0.269304	1.173
1406	0.526165	6699.22	u*/ws	tau_sk	u*/ws	0.784375	0.000712424	0.288638	1.00314	1.22226	-0.204404		1406	0.526632	6719.16	h/Kc	did50	tau_sk	2.71669e+12	2.73093e+20	1.79173e-37	0.269304	-0.903308	1.173
1407	0.526165	6699.22	tau_sk	u*/ws	u*/ws	0.784375	0.000712424	0.288638	1.22226	1.00314	-0.204404		1407	0.526632	6719.16	did50	tau_sk	h/Kc	2.71669e+12	2.73093e+20	1.79173e-37	-0.903308	1.173	0.269304
1408	0.525582	6603.67	h/D50	S	u*/ws	0.00428375	0.0283795	60.6302	-0.955657	-0.414281	1.73294		1408	0.526632	6719.16	tau_sk	did50	h/Kc	2.71669e+12	2.73093e+20	1.79173e-37	1.173	-0.903308	0.269304
1409	0.525582	6603.67	S	h/D50	u*/ws	0.00428375	0.0283795	60.6302	-0.414281	-0.955657	1.73294		1409	0.526632	6719.16	tau_sk	h/Kc	did50	2.71669e+12	2.73093e+20	1.79173e-37	1.173	0.269304	-0.903308
1410	0.525582	6603.67	h/D50	u*/ws	S	0.00428375	0.0283795	60.6302	-0.955657	1.73294	-0.414281		1410	0.526632	6719.16	h/Kc	tau_sk	did50	2.71669e+12	2.73093e+20	1.79173e-37	0.269304	1.173	-0.903308
1411	0.525582	6603.67	S	u*/ws	h/D50	0.00428375	0.0283795	60.6302	-0.414281	1.73294	-0.955657		1411	0.517036	6738.34	h/D50	u*/ws	u*/ws	0.08514	0.0264634	4.09974	-0.585721	0.910664	0.791951
1412	0.525582	6603.67	u*/ws	S	h/D50	0.00428375	0.0283795	60.6302	1.73294	-0.414281	-0.955657		1412	0.517036	6738.34	u*/ws	u*/ws	h/D50	0.08514	0.0264634	4.09974	0.910664	0.791951	-0.585721
1413	0.525582	6603.67	u*/ws	h/D50	S	0.00428375	0.0283795	60.6302	1.73294	-0.955657	-0.414281		1413	0.517036	6738.34	u*/ws	h/D50	u*/ws	0.08514	0.0264634	4.09974	0.910664	-0.585721	0.791951
1414	0.519528	6963.51	Fr	S	tau_sk	0.00754423	2.45419	0.0124425	1.30891	-0.366171	1.2533		1414	0.517037	6738.34	h/D50	u*/ws	h/D50	0.000822623	0.00208533	5384.09	1.27407	1.7026	-1.85978
1415	0.519528	6963.51	S	Fr	tau_sk	0.00754423	2.45419	0.0124425	-0.366171	1.30891	1.2533		1415	0.517037	6738.34	u*/ws	h/D50	h/D50	0.000822623	0.00208533	5384.09	1.7026	1.27407	-1.85978
1416	0.519528	6963.51	Fr	tau_sk	S	0.00754423	2.45419	0.0124425	1.30891	1.2533	-0.366171		1416	0.517037	6738.34	h/D50	h/D50	u*/ws	0.000822623	0.00208533	5384.09	1.27407	-1.85978	1.7026
1417	0.519528	6963.51	tau_sk	Fr	S	0.00754423	2.45419	0.0124425	1.2533	1.30891	-0.366171		1417	0.523252	6778.51	did50	Rep (u*D)	u*/ws	0.00661514	0.0554968	0.744286	1.24124	-0.988654	1.78672
1418	0.519528	6963.51	tau_sk	S	Fr	0.00754423	2.45419	0.0124425	1.2533	-0.366171	1.30891		1418	0.523252	6778.51	Rep (u*D)	did50	u*/ws	0.00661514	0.0554968	0.744286	-0.988654	1.24124	1.78672
1419	0.519528	6963.51	S	tau_sk	Fr	0.00754423	2.45419	0.0124425	-0.366171	1.2533	1.30891		1419	0.523252	6778.51	did50	u*/ws	Rep (u*D)	0.00661514	0.0554968	0.744286	1.24124	1.78672	-0.988654
1420	0.519528	6963.51	Cf	S	tau_sk	0.311057	0.01165	0.0635614	-0.654477	0.288279	1.25331		1420	0.523252	6778.51	u*/ws	did50	Rep (u*D)	0.00661514	0.0554968	0.744286	1.78672	1.24124	-0.988654
1421	0.519528	6963.51	S	Cf	tau_sk	0.311057	0.01165	0.0635614	0.288279	-0.654477	1.25331		1421	0.523252	6778.51	Rep (u*D)	u*/ws	did50	0.00661514	0.0554968	0.744286	-0.988654	1.78672	1.24124
1422	0.519528	6963.51	Cf	tau_sk	S	0.311057	0.01165	0.0635614	-0.654477	1.25331	0.288279		1422	0.523252	6778.51	u*/ws	Rep (u*D)	did50	0.00661514	0.0554968	0.744286	1.78672	-0.988654	1.24124
1423	0.519528	6963.51	tau_sk	Cf	S	0.311057	0.01165	0.0635614	1.25331	-0.654477	0.288279		1423	0.510979	6939.34	Fr	Rep	Cf	0.0258594	0.120871	0.760933	0.714713	-0.919003	-0.0938271
1424	0.519528	6963.51	S	tau_sk	Cf	0.311057	0.01165	0.0635614	0.288279	1.25331	-0.654477		1424	0.510979	6939.34	Rep	Fr	Cf	0.0258594	0.120871	0.760933	-0.919003	0.714713	-0.0938271
1425	0.519528	6963.51	tau_sk	S	Cf	0.311057	0.01165	0.0635614	1.25331	0.288279	-0.654477		1425	0.510979	6939.34	Fr	Cf	Rep	0.0258594	0.120871	0.760933	0.714713	-0.0938271	-0.919003
1426	0.519528	6963.51	h/Kc	S	tau_sk	0.112624	0.125803	0.25948	0.218161	0.288289	1.25329		1426	0.510979	6939.34	Cf	Fr	Rep	0.0258594	0.120871	0.760933	-0.0938271	0.714713	-0.919003
1427	0.519528	6963.51	S	h/Kc	tau_sk	0.112624	0.125803	0.25948	0.288289	0.218161	1.25329		1427	0.510979	6939.34	Rep	Cf	Fr	0.0258594	0.120871	0.760933	-0.919003	-0.0938271	0.714713
1428	0.519528	6963.51	h/Kc	tau_sk	S	0.112624	0.125803	0.25948	0.218161	1.25329	0.288289		1428	0.510979	6939.34	Cf	Rep	Fr	0.0258594	0.120871	0.760933	-0.0938271	-0.919003	0.714713
1429	0.519528	6963.51	tau_sk	h/Kc	S	0.112624	0.125803	0.25948	1.25329	0.218161	0.288289		1429	0.509752	6954.51	u*/ws	Rep (u*D)	u*/ws	0.0715589	0.898069	0.032551	0.16994	-1.42381	0.659581
1430	0.519528	6963.51	S	tau_sk	h/Kc	0.112624	0.125803	0.25948	0.288289	1.25329	0.218161		1430	0.509752	6954.51	u*/ws	u*/ws	Rep (u*D)	0.0715589	0.898069	0.032551	0.16994	0.659581	-1.42381
1431	0.519528	6963.51	tau_sk	S	h/Kc	0.112624	0.125803	0.25948	1.25329	0.288289	0.218161		1431	0.509752	6954.51	Rep (u*D)	u*/ws	u*/ws	0.0715589	0.898069	0.032551	-1.42381	0.16994	0.659581
1432	0.51918	6995.11	h/Kc	h/D50	tau_sk	0.176138	0.000471205	40.4847	0.195361	-0.247269	1.32005		1432	0.509752	6954.51	Rep (u*D)	Rep (u*D)	u*/ws	0.043424	1.38608	0.0347561	0.731743	-2.15552	0.829483
1433	0.51918	6995.11	h/D50	h/Kc	tau_sk	0.176138	0.000471205	40.4847	-0.247269	0.195361	1.32005		1433	0.509752	6954.51	Rep (u*D)	u*/ws	Rep (u*D)	0.043424	1.38608	0.0347561	0.731743	0.829483	-2.15552
1434	0.51918	6995.11	h/Kc	tau_sk	h/D50	0.176138	0.000471205	40.4847	0.195361	1.32005	-0.247269		1434	0.509752	6954.51	u*/ws	Rep (u*D)	Rep (u*D)	0.043424	1.38608	0.0347561	0.829483	0.731743	-2.15552
1435	0.51918	6995.11	tau_sk	h/Kc	h/D50	0.176138	0.000471205	40.4847	1.32005	0.195361	-0.247269		1435	0.518977	6955.37	Cf	tau_sk	S	0.690283	0.00254202	0.102081	-0.681034	1.21557	0.277758
1436	0.51918	6995.11	h/D50	tau_sk	h/Kc	0.176138	0.000471205	40.4847	-0.247269	1.32005	0.195361		1436	0.518977	6955.37	Cf	S	tau_sk	0.690283	0.00254202	0.102081	-0.681034	0.277758	1.21557
1437	0.51918	6995.11	tau_sk	h/D50	h/Kc	0.176138	0.000471205	40.4847	1.32005	-0.247269	0.195361		1437	0.518977	6955.37	S	Cf	tau_sk	0.690283	0.00254202	0.102081	0.277758	-0.681034	1.21557
1438	0.518986	7007.06	h/D50	Cf	tau_sk	82.3507	0.000760621	0.00513576	-0.247049	-0.564175	1.34943		1438	0.518977	6955.37	tau_sk	Cf	S	0.690283	0.00254202	0.102081	1.21557	-0.681034	0.277758
1439	0.518986	7007.06	Cf	h/D50	tau_sk	82.3507	0.000760621	0.00513576	-0.564175	-0.247049	1.34943		1439	0.518977	6955.37	S	tau_sk	Cf	0.690283	0.00254202	0.102081	0.277758	1.21557	-0.681034
1440	0.518986	7007.06	h/D50	tau_sk	Cf	82.3507	0.000760621	0.00513576	-0.247049	1.34943	-0.564175		1440	0.518977	6955.37	tau_sk	S	Cf	0.690283	0.00254202	0.102081	1.21557	0.277758	-0.681034
1441	0.518986	7007.06	tau_sk	h/D50	Cf	82.3507	0.000760621	0.00513576	1.34943	-0.247049	-0.564175		1441	0.518977	6955.37	Fr	h/Kc	tau_sk	0.310631	0.0284003	0.111901	0.55549	0.134432	1.21557
1442	0.518986	7007.06	Cf	tau_sk	h/D50	82.3507	0.000760621	0.00513576	-0.564175	1.34943	-0.247049		1442	0.518977	6955.37	h/Kc	Fr	tau_sk	0.310631	0.0284003	0.111901	0.134432	0.55549	1.21557
1443	0.518986	7007.06	tau_sk	Cf	h/D50	82.3507	0.000760621	0.00513576	1.34943	-0.564175	-0.247049		1443	0.518977	6955.37	tau_sk	h/Kc	Fr	0.310631	0.0284003	0.111901	1.21557	0.134432	0.55549
1444	0.518054	6985.41	Fr	h/Kc	tau_sk	0.0164334	0.487893	0.170326	0.701203	0.117409	1.17561		1444	0.518977	6955.37	Fr	tau_sk	h/Kc	0.310631	0.0284003	0.111901	0.55549	1.21557	0.134432
1445	0.518054	6985.41	h/Kc	Fr	tau_sk	0.0164334	0.487893	0.170326	0.117409	0.701203	1.17561		1445	0.518977	6955.37	tau_sk	Fr	h/Kc	0.310631	0.0284003	0.111901	1.21557	0.55549	0.134432
1446	0.518054	6985.41	Fr	tau_sk	h/Kc	0.0164334	0.487893	0.170326	0.701203	1.17561	0.117409		1446	0.518977	6955.37	h/Kc	tau_sk	Fr	0.310631	0.0284003	0.111901	0.134432	1.21557	0.55549
1447	0.518054	6985.41	tau_sk	Fr	h/Kc	0.0164334	0.487893	0.170326	1.17561	0.701203	0.117409		1447	0.51851	6985.15	h/D50	Cf	tau_sk	948.95	2.44867e-05	0.00888893	-0.230268	-0.609281	1.28185
1448	0.518054	6985.41	h/Kc	tau_sk	Fr	0.0164334	0.487893	0.170326	0.117409	1.17561	0.701203		1448	0.51851	6985.15	Cf	h/D50	tau_sk	948.95	2.44867e-05	0.00888893	-0.609281	-0.230268	1.28185
1449	0.518054	6985.41	tau_sk	h/Kc	Fr	0.0164334	0.487893	0.170326	1.17561	0.117409	0.701203		1449	0.51851	6985.15	h/D50	tau_sk	Cf	948.95	2.44867e-05	0.00888893	-0.230268	1.28185	-0.609281
1450	0.517327	6742.55	h/D50	u*/ws	h/D50	7.13123e-05	0.0292841	4205.02	1.29334	1.66871	-1.87042		1450	0.51851	6985.15	tau_sk	h/D50	Cf	948.95	2.44867e-05	0.00888893	1.28185	-0.230268	-0.609281
1451	0.517327	6742.55	u*/ws	h/D50	h/D50	7.13123e-05	0.0292841	4205.02	1.66871	1.29334	-1.87042		1451	0.51851	6985.15	Cf	tau_sk	h/D50	948.95	2.44867e-05	0.00888893	-0.609281	1.28185	-0.230268
1452	0.517327	6742.55	h/D50	h/D50	u*/ws	7.13123e-05	0.0292841	4205.02	1.29334	-1.87042	1.66871		1452	0.51851	6985.15	tau_sk	Cf	h/D50	948.95	2.44867e-05	0.00888893	1.28185	-0.609281	-0.230268
1453	0.517327	6742.55	h/D50	u*/ws	u*/ws	0.186472	0.0109638	4.29491	-0.577074	0.994376	0.674326		1453	0.51851	6985.15	h/Kc	tau_sk	h/D50	0.0106667	0.152005	1.67907	0.2031	1.28182	-0.230269
1454	0.517327	6742.55	u*/ws	h/D50	u*/ws	0.186472	0.0109638	4.29491	0.994376	-0.577074	0.674326		1454	0.51851	6985.15	tau_sk	h/Kc	h/D50	0.0106667	0.152005	1.67907	1.28182	0.2031	-0.230269
1455	0.517327	6742.55	u*/ws	u*/ws	h/D50	0.186472	0.0109638	4.29491	0.994376	0.674326	-0.577074		1455	0.51851	6985.15	h/D50	tau_sk	h/Kc	0.0106667	0.152005	1.67907	-0.230269	1.28182	0.2031
1456	0.516567	7038.33	Fr	Cf	tau_sk	8.70466e-05	3.80629	1.5722	0.689216	-0.262379	1.27418		1456	0.51851	6985.15	h/Kc	h/D50	tau_sk	0.0106667	0.152005	1.67907	0.2031	-0.230269	1.28182
1457	0.516567	7038.33	Cf	Fr	tau_sk	8.70466e-05	3.80629	1.5722	-0.262379	0.689216	1.27418		1457	0.51851	6985.15	h/D50	h/Kc	tau_sk	0.0106667	0.152005	1.67907	-0.230269	0.2031	1.28182
1458	0.516567	7038.33	Fr	tau_sk	Cf	8.70466e-05	3.80629	1.5722	0.689216	1.27418	-0.262379		1458	0.51851	6985.15	tau_sk	h/D50	h/Kc	0.0106667	0.152005	1.67907	1.28182	-0.230269	0.2031
1459	0.516567	7038.33	tau_sk	Fr	Cf	8.70466e-05	3.80629	1.5722	1.27418	0.689216	-0.262379		1459	0.516539	7010.04	Fr	S	tau_sk	0.0063536	1.72139	0.027991	1.49435	-0.373406	1.18807
1460	0.516567	7038.33	Cf	tau_sk	Fr	8.70466e-05	3.80629	1.5722	-0.262379	1.27418	0.689216		1460	0.516539	7010.04	S	Fr	tau_sk	0.0063536	1.72139	0.027991	-0.373406	1.49435	1.18807
1461	0.516567	7038.33	tau_sk	Cf	Fr	8.70466e-05	3.80629	1.5722	1.27418	-0.262379	0.689216		1461	0.516539	7010.04	Fr	tau_sk	S	0.0063536	1.72139	0.027991	1.49435	1.18807	-0.373406
1462	0.513679	6861.87	h/D50	u*/ws	tau	0.0960585	0.6071	0.0447777	-0.415315	1.5336	-0.332231		1462	0.516539	7010.04	tau_sk	Fr	S	0.0063536	1.72139	0.027991	1.18807	1.49435	-0.373406
1463	0.513679	6861.87	u*/ws	h/D50	tau	0.0960585	0.6071	0.0447777	1.5336	-0.415315	-0.332231		1463	0.516539	7010.04	S	tau_sk	Fr	0.0063536	1.72139	0.027991	-0.373406	1.18807	1.49435
1464	0.513679	6861.87	tau	h/D50	u*/ws	0.0960585	0.6071	0.0447777	-0.332231	-0.415315	1.5336		1464	0.516539	7010.04	tau_sk	S	Fr	0.0063536	1.72139	0.027991	1.18807	-0.373406	1.49435
1465	0.513679	6861.87	u*/ws	tau	h/D50	0.0960585	0.6071	0.0447777	1.5336	-0.332231	-0.415315		1465	0.491556	7039.42	S	h/D50	Rep (u*_sk D)	2.84777	12.6185	1.41626	1.69357	0.821079	-2.49873
1466	0.513679	6861.87	tau	u*/ws	h/D50	0.0960585	0.6071	0.0447777	-0.332231	1.5336	-0.415315		1466	0.491556	7039.42	h/D50	Rep (u*_sk D)	S	2.84777	12.6185	1.41626	0.821079	-2.49873	1.69357
1467	0.513679	6861.87	h/D50	tau	u*/ws	0.0960585	0.6071	0.0447777	-0.415315	-0.332231	1.5336		1467	0.491556	7039.42	Rep (u*_sk D)	h/D50	S	2.84777	12.6185	1.41626	-2.49873	0.821079	1.69357
1468	0.509933	7095.37	h/D50	tau_sk	Fr	0.229745	4.34473	0.000351849	0.284747	1.20397	1.24092		1468	0.491556	7039.42	h/D50	S	Rep (u*_sk D)	2.84777	12.6185	1.41626	0.821079	1.69357	-2.49873
1469	0.509933	7095.37	Fr	h/D50	tau_sk	0.229745	4.34473	0.000351849	1.24092	0.284747	1.20397		1469	0.491556	7039.42	Rep (u*_sk D)	S	h/D50	2.84777	12.6185	1.41626	-2.49873	1.69357	0.821079
1470	0.509933	7095.37	h/D50	Fr	tau_sk	0.229745	4.34473	0.000351849	0.284747	1.24092	1.20397		1470	0.491556	7039.42	S	Rep (u*_sk D)	h/D50	2.84777	12.6185	1.41626	1.69357	-2.49873	0.821079
1471	0.509933	7095.37	Fr	tau_sk	h/D50	0.229745	4.34473	0.000351849	1.24092	1.20397	0.284747		1471	0.514342	7070.54	Fr	Cf	tau_sk	0.000204778	2.49721	1.35865	0.755945	-0.234011	1.22608
1472	0.509933	7095.37	tau_sk	Fr	h/D50	0.229745	4.34473	0.000351849	1.20397	1.24092	0.284747		1472	0.514342	7070.54	Cf	tau_sk	Fr	0.000204778	2.49721	1.35865	-0.234011	1.22608	0.755945
1473	0.509933	7095.37	tau_sk	h/D50	Fr	0.229745	4.34473	0.000351849	1.20397	0.284747	1.24092		1473	0.514342	7070.54	Cf	Fr	tau_sk	0.000204778	2.49721	1.35865	-0.234011	0.755945	1.22608
1474	0.509788	6955.05	Rep (u*D)	Rep (u*D)	u*/ws	0.046092	1.13972	0.0424568	0.709541	-2.15343	0.817655		1474	0.514342	7070.54	Fr	tau_sk	Cf	0.000204778	2.49721	1.35865	0.755945	1.22608	-0.234011
1475	0.509788	6955.05	Rep (u*D)	u*/ws	Rep (u*D)	0.046092	1.13972	0.0424568	0.709541	0.817655	-2.15343		1475	0.514342	7070.54	tau_sk	Fr	Cf	0.000204778	2.49721	1.35865	1.22608	0.755945	-0.234011
1476	0.509788	6955.05	u*/ws	Rep (u*D)	Rep (u*D)	0.046092	1.13972	0.0424568	0.817655	0.709541	-2.15343		1476	0.514342	7070.54	tau_sk	Cf	Fr	0.000204778	2.49721	1.35865	1.22608	-0.234011	0.755945
1477	0.509788	6955.05	Rep (u*D)	u*/ws	u*/ws	0.0592463	0.918892	0.040971	-1.44392	0.241738	0.575906		1477	0.509144	7083.77	Fr	h/D50	tau_sk	0.00575568	8445.31	5.04379e-06	1.33134	0.337112	1.15985
1478	0.509788	6955.05	u*/ws	Rep (u*D)	u*/ws	0.0592463	0.918892	0.040971	0.241738	-1.44392	0.575906		1478	0.509144	7083.77	h/D50	Fr	tau_sk	0.00575568	8445.31	5.04379e-06	0.337112	1.33134	1.15985
1479	0.509788	6955.05	u*/ws	u*/ws	Rep (u*D)	0.0592463	0.918892	0.040971	0.241738	0.575906	-1.44392		1479	0.509144	7083.77	Fr	tau_sk	h/D50	0.00575568	8445.31	5.04379e-06	1.33134	1.15985	0.337112
1480	0.505675	7034.14	did50	Rep (u*D)	u*/ws	0.00411013	0.0193873	1.38373	1.71129	-0.78036	2.17717		1480	0.509144	7083.77	tau_sk	Fr	h/D50	0.00575568	8445.31	5.04379e-06	1.15985	1.33134	0.337112
1481	0.505675	7034.14	Rep (u*D)	did50	u*/ws	0.00411013	0.0193873	1.38373	-0.78036	1.71129	2.17717		1481	0.509144	7083.77	h/D50	tau_sk	Fr	0.00575568	8445.31	5.04379e-06	0.337112	1.15985	1.33134
1482	0.505675	7034.14	did50	u*/ws	Rep (u*D)	0.00411013	0.0193873	1.38373	1.71129	2.17717	-0.78036		1482	0.509144	7083.77	tau_sk	h/D50	Fr	0.00575568	8445.31	5.04379e-06	1.15985	0.337112	1.33134
1483	0.505675	7034.14	u*/ws	did50	Rep (u*D)	0.00411013	0.0193873	1.38373	2.17717	1.71129	-0.78036		1483	0.499859	7093.48	h/Kc	Rep (u*_sk D)	Rep (u*D)	0.000933806	1.61678	28.7407	-0.111254	1.3918	-3.04346
1484	0.505675	7034.14	Rep (u*D)	u*/ws	did50	0.00411013	0.0193873	1.38373	-0.78036	2.17717	1.71129		1484	0.499859	7093.48	Rep (u*_sk D)	h/Kc	Rep (u*D)	0.000933806	1.61678	28.7407	1.3918	-0.111254	-3.04346
1485	0.505675	7034.14	u*/ws	Rep (u*D)	did50	0.00411013	0.0193873	1.38373	2.17717	-0.78036	1.71129		1485	0.499859	7093.48	h/Kc	Rep (u*D)	Rep (u*_sk D)	0.000933806	1.61678	28.7407	-0.111254	-3.04346	1.3918
1486	0.4974	7334.86	tau_sk	Fr	tau	1.44366	0.00476505	0.355945	1.39832	0.642577	-0.143167		1486	0.499859	7093.48	Rep (u*D)	h/Kc	Rep (u*_sk D)	0.000933806	1.61678	28.7407	-3.04346	-0.111254	1.3918
1487	0.4974	7334.86	Fr	tau	tau_sk	1.44366	0.00476505	0.355945	0.642577	-0.143167	1.39832		1487	0.499859	7093.48	Rep (u*_sk D)	Rep (u*D)	h/Kc	0.000933806	1.61678	28.7407	1.3918	-3.04346	-0.111254
1488	0.4974	7334.86	tau_sk	tau	Fr	1.44366	0.00476505	0.355945	1.39832	-0.143167	0.642577		1488	0.499859	7093.48	Rep (u*D)	Rep (u*_sk D)	h/Kc	0.000933806	1.61678	28.7407	-3.04346	1.3918	-0.111254
1489	0.4974	7334.86	tau	tau_sk	Fr	1.44366	0.00476505	0.355945	-0.143167	1.39832	0.642577		1489	0.493512	7213.66	u*/ws	did50	Cf	3.50811e-06	0.14051	0.761048	1.83285	0.55251	-0.729996
1490	0.4974	7334.86	Fr	tau_sk	tau	1.44366	0.00476505	0.355945	0.642577	1.39832	-0.143167		1490	0.493512	7213.66	u*/ws	Cf	did50	3.50811e-06	0.14051	0.761048	1.83285	-0.729996	0.55251
1491	0.4974	7334.86	tau	Fr	tau_sk	1.44366	0.00476505	0.355945	-0.143167	0.642577	1.39832		1491	0.493512	7213.66	did50	Cf	u*/ws	3.50811e-06	0.14051	0.761048	0.55251	-0.729996	1.83285
1492	0.496463	6989.09	h/D50	Rep (u*_sk D)	S	0.0141975	0.193546	6616.93	0.693349	-2.38645	1.46942		1492	0.493512	7213.66	Cf	did50	u*/ws	3.50811e-06	0.14051	0.761048	-0.729996	0.55251	1.83285
1493	0.496463	6989.09	Rep (u*_sk D)	h/D50	S	0.0141975	0.193546	6616.93	-2.38645	0.693349	1.46942		1493	0.493512	7213.66	did50	u*/ws	Cf	3.50811e-06	0.14051	0.761048	0.55251	1.83285	-0.729996
1494	0.496463	6989.09	h/D50	S	Rep (u*_sk D)	0.0141975	0.193546	6616.93	0.693349	1.46942	-2.38645		1494	0.493512	7213.66	Cf	u*/ws	did50	3.50811e-06	0.14051	0.761048	-0.729996	1.83285	0.55251
1495	0.496463	6989.09	S	h/D50	Rep (u*_sk D)	0.0141975	0.193546	6616.93	1.46942	0.693349	-2.38645		1495	0.493512	7213.66	did50	h/Kc	u*/ws	0.000114027	3.94817	0.018308	0.552498	0.243333	1.83284
1496	0.496463	6989.09	Rep (u*_sk D)	S	h/D50	0.0141975	0.193546	6616.93	-2.38645	1.46942	0.693349		1496	0.493512	7213.66	h/Kc	did50	u*/ws	0.000114027	3.94817	0.018308	0.243333	0.552498	1.83284
1497	0.496463	6989.09	S	Rep (u*_sk D)	h/D50	0.0141975	0.193546	6616.93	1.46942	-2.38645	0.693349		1497	0.493512	7213.66	did50	u*/ws	h/Kc	0.000114027	3.94817	0.018308	0.552498	1.83284	0.243333
1498	0.494734	7393.11	Fr	Fr	tau_sk	762.247	0.00869988	0.000352398	0.628255	0.0678815	1.28858		1498	0.493512	7213.66	u*/ws	did50	h/Kc	0.000114027	3.94817	0.018308	1.83284	0.552498	0.243333
1499	0.494734	7393.11	Fr	tau_sk	Fr	762.247	0.00869988	0.000352398	0.628255	1.28858	0.0678815		1499	0.493512	7213.66	h/Kc	u*/ws	did50	0.000114027	3.94817	0.018308	0.243333	1.83284	0.552498
1500	0.494734	7393.11	tau_sk	Fr	Fr	762.247	0.00869988	0.000352398	1.28858	0.628255	0.0678815		1500	0.493512	7213.66	u*/ws	h/Kc	did50	0.000114027	3.94817	0.018308	1.83284	0.243333	0.552498
1501	0.494734	7393.1	Fr	tau_sk	tau_sk	4.10752	0.00875568	0.0649788	0.696136	0.881073	0.407476		1501	0.489014	7265.1	Rep (u*_sk D)	Cf	u*/ws	2046.17	6.58346e-07	7.47526e-05	0.237219	-0.911908	1.64406
1502	0.494734	7393.1	tau_sk	Fr	tau_sk	4.10752	0.00875568	0.0649788	0.881073	0.696136	0.407476		1502	0.489014	7265.1	Cf	Rep (u*_sk D)	u*/ws	2046.17	6.58346e-07	7.47526e-05	-0.911908	0.237219	1.64406
1503	0.494734	7393.1	tau_sk	tau_sk	Fr	4.10752	0.00875568	0.0649788	0.881073	0.407476	0.696136		1503	0.489014	7265.1	Rep (u*_sk D)	u*/ws	Cf	2046.17	6.58346e-07	7.47526e-05	0.237219	1.64406	-0.911908
1504	0.494496	7288.16	Cf	tau_sk	tau	5.35274	28.2571	9.38083e-08	-0.631406	1.29204	0.267058		1504	0.489014	7265.1	u*/ws	Rep (u*_sk D)	Cf	2046.17	6.58346e-07	7.47526e-05	1.64406	0.237219	-0.911908
1505	0.494496	7288.16	tau_sk	Cf	tau	5.35274	28.2571	9.38083e-08	1.29204	-0.631406	0.267058		1505	0.489014	7265.1	Cf	u*/ws	Rep (u*_sk D)	2046.17	6.58346e-07	7.47526e-05	-0.911908	1.64406	0.237219
1506	0.494496	7288.16	Cf	tau	tau_sk	5.35274	28.2571	9.38083e-08	-0.631406	0.267058	1.29204		1506	0.489014	7265.1	u*/ws	Cf	Rep (u*_sk D)	2046.17	6.58346e-07	7.47526e-05	1.64406	-0.911908	0.237219
1507	0.494496	7288.16	tau	Cf	tau_sk	5.35274	28.2571	9.38083e-08	0.267058	-0.631406	1.29204		1507	0.489014	7265.1	h/Kc	Rep (u*_sk D)	u*/ws	1.40186	0.0263946	0.00012914	0.303967	0.237222	1.64402
1508	0.494496	7288.16	tau	tau_sk	Cf	5.35274	28.2571	9.38083e-08	0.267058	1.29204	-0.631406		1508	0.489014	7265.1	Rep (u*_sk D)	h/Kc	u*/ws	1.40186	0.0263946	0.00012914	0.237222	0.303967	1.64402
1509	0.494496	7288.16	tau_sk	tau	Cf	5.35274	28.2571	9.38083e-08	1.29204	0.267058	-0.631406		1509	0.489014	7265.1	u*/ws	h/Kc	Rep (u*_sk D)	1.40186	0.0263946	0.00012914	1.64402	0.303967	0.237222
1510	0.494496	7288.16	h/Kc	tau_sk	tau	0.0527654	0.178797	0.0217712	0.210463	1.29206	0.267038		1510	0.489014	7265.1	Rep (u*_sk D)	u*/ws	h/Kc	1.40186	0.0263946	0.00012914	0.237222	1.64402	0.303967
1511	0.494496	7288.16	tau_sk	h/Kc	tau	0.0527654	0.178797	0.0217712	1.29206	0.210463	0.267038		1511	0.489014	7265.1	u*/ws	Rep (u*_sk D)	h/Kc	1.40186	0.0263946	0.00012914	1.64402	0.237222	0.303967
1512	0.494496	7288.16	h/Kc	tau	tau_sk	0.0527654	0.178797	0.0217712	0.210463	0.267038	1.29206		1512	0.489014	7265.1	h/Kc	u*/ws	Rep (u*_sk D)	1.40186	0.0263946	0.00012914	0.303967	1.64402	0.237222
1513	0.494496	7288.16	tau	h/Kc	tau_sk	0.0527654	0.178797	0.0217712	0.267038	0.210463	1.29206		1513	0.494116	7282.59	Cf	tau	tau_sk	0.000674672	0.669397	0.0260218	-0.66408	0.268006	1.25407
1514	0.494496	7288.16	tau_sk	tau	h/Kc	0.0527654	0.178797	0.0217712	1.29206	0.267038	0.210463		1514	0.494116	7282.59	tau	Cf	tau_sk	0.000674672	0.669397	0.0260218	0.268006	-0.66408	1.25407
1515	0.494496	7288.16	tau	tau_sk	h/Kc	0.0527654	0.178797	0.0217712	0.267038	1.29206	0.210463		1515	0.494116	7282.59	Cf	tau_sk	tau	0.000674672	0.669397	0.0260218	-0.66408	1.25407	0.268006
1516	0.493545	7214.13	did50	Cf	u*/ws	2.12708e-07	0.13671	12.4083	0.556224	-0.73421	1.83652		1516	0.494116	7282.59	tau_sk	Cf	tau	0.000674672	0.669397	0.0260218	1.25407	-0.66408	0.268006
1517	0.493545	7214.13	Cf	did50	u*/ws	2.12708e-07	0.13671	12.4083	-0.73421	0.556224	1.83652		1517	0.494116	7282.59	tau_sk	tau	Cf	0.000674672	0.669397	0.0260218	1.25407	0.268006	-0.66408
1518	0.493545	7214.13	did50	u*/ws	Cf	2.12708e-07	0.13671	12.4083	0.556224	1.83652	-0.73421		1518	0.494116	7282.59	tau	tau_sk	Cf	0.000674672	0.669397	0.0260218	0.268006	1.25407	-0.66408
1519	0.493545	7214.13	u*/ws	did50	Cf	2.12708e-07	0.13671	12.4083	1.83652	0.556224	-0.73421		1519	0.494116	7282.59	tau_sk	h/Kc	tau	0.103341	0.0944476	0.0200136	1.25406	0.221364	0.268016
1520	0.493545	7214.13	Cf	u*/ws	did50	2.12708e-07	0.13671	12.4083	-0.73421	1.83652	0.556224		1520	0.494116	7282.59	h/Kc	tau	tau_sk	0.103341	0.0944476	0.0200136	0.221364	0.268016	1.25406
1521	0.493545	7214.13	u*/ws	Cf	did50	2.12708e-07	0.13671	12.4083	1.83652	-0.73421	0.556224		1521	0.494116	7282.59	tau	h/Kc	tau_sk	0.103341	0.0944476	0.0200136	0.268016	0.221364	1.25406
1522	0.490311	7347.5	Cf	tau_sk	tau_sk	7.48632	2.04903e+06	3.30252e-12	-0.455677	2.80237	-1.3081		1522	0.494116	7282.59	tau	tau_sk	h/Kc	0.103341	0.0944476	0.0200136	0.268016	1.25406	0.221364
1523	0.490311	7347.5	tau_sk	Cf	tau_sk	7.48632	2.04903e+06	3.30252e-12	2.80237	-0.455677	-1.3081		1523	0.494116	7282.59	h/Kc	tau_sk	tau	0.103341	0.0944476	0.0200136	0.221364	1.25406	0.268016
1524	0.490311	7347.5	tau_sk	tau_sk	Cf	7.48632	2.04903e+06	3.30252e-12	2.80237	-1.3081	-0.455677		1524	0.494116	7282.59	tau_sk	tau	h/Kc	0.103341	0.0944476	0.0200136	1.25406	0.268016	0.221364
1525	0.490311	7347.5	h/Kc	Cf	tau_sk	1530.99	2.29453e-10	0.239907	-0.503937	-1.96749	1.49428		1525	0.487616	7297.07	u*/ws	Cf	u*/ws	1434.82	2.85052e-05	5.54369e-06	6.41634	-0.872951	-4.89654
1526	0.490311	7347.5	Cf	h/Kc	tau_sk	1530.99	2.29453e-10	0.239907	-1.96749	-0.503937	1.49428		1526	0.487616	7297.07	u*/ws	u*/ws	Cf	1434.82	2.85052e-05	5.54369e-06	6.41634	-4.89654	-0.872951
1527	0.490311	7347.5	h/Kc	tau_sk	Cf	1530.99	2.29453e-10	0.239907	-0.503937	1.49428	-1.96749		1527	0.487616	7297.07	Cf	u*/ws	u*/ws	1434.82	2.85052e-05	5.54369e-06	-0.872951	6.41634	-4.89654
1528	0.490311	7347.5	tau_sk	h/Kc	Cf	1530.99	2.29453e-10	0.239907	1.49428	-0.503937	-1.96749		1528	0.487616	7297.07	Cf	Cf	u*/ws	1.54898e-05	0.00387878	3.77375	1.47791	-2.35085	1.51982
1529	0.490311	7347.5	Cf	tau_sk	h/Kc	1530.99	2.29453e-10	0.239907	-1.96749	1.49428	-0.503937		1529	0.487616	7297.07	Cf	u*/ws	Cf	1.54898e-05	0.00387878	3.77375	1.47791	1.51982	-2.35085
1530	0.490311	7347.5	tau_sk	Cf	h/Kc	1530.99	2.29453e-10	0.239907	1.49428	-1.96749	-0.503937		1530	0.487616	7297.07	u*/ws	Cf	Cf	1.54898e-05	0.00387878	3.77375	1.51982	1.47791	-2.35085
1531	0.490311	7347.5	h/Kc	tau_sk	tau_sk	4580.81	17655.7	4.30968e-12	0.151889	4.61299	-3.11871		1531	0.487616	7297.07	Cf	h/Kc	u*/ws	6.222e-05	0.438587	0.332916	-0.000989626	0.290657	1.5198
1532	0.490311	7347.5	tau_sk	h/Kc	tau_sk	4580.81	17655.7	4.30968e-12	4.61299	0.151889	-3.11871		1532	0.487616	7297.07	Cf	u*/ws	h/Kc	6.222e-05	0.438587	0.332916	-0.000989626	1.5198	0.290657
1533	0.490311	7347.5	tau_sk	tau_sk	h/Kc	4580.81	17655.7	4.30968e-12	4.61299	-3.11871	0.151889		1533	0.487616	7297.07	h/Kc	Cf	u*/ws	6.222e-05	0.438587	0.332916	0.290657	-0.000989626	1.5198
1534	0.490311	7347.5	Cf	Cf	tau_sk	25.7157	0.000103582	0.0190174	-1.43545	0.97976	1.49427		1534	0.487616	7297.07	u*/ws	h/Kc	Cf	6.222e-05	0.438587	0.332916	1.5198	0.290657	-0.000989626
1535	0.490311	7347.5	Cf	tau_sk	Cf	25.7157	0.000103582	0.0190174	-1.43545	1.49427	0.97976		1535	0.487616	7297.07	h/Kc	u*/ws	Cf	6.222e-05	0.438587	0.332916	0.290657	1.5198	-0.000989626
1536	0.490311	7347.5	tau_sk	Cf	Cf	25.7157	0.000103582	0.0190174	1.49427	-1.43545	0.97976		1536	0.487616	7297.07	u*/ws	Cf	h/Kc	6.222e-05	0.438587	0.332916	1.5198	-0.000989626	0.290657
1537	0.490311	7347.5	h/Kc	h/Kc	tau_sk	0.00167668	12.7055	0.0163621	0.902123	-0.750235	1.49427		1537	0.487616	7297.07	h/Kc	h/Kc	u*/ws	0.00769699	2635.75	4.49697e-07	-3.03974	3.33073	1.5198
1538	0.490311	7347.5	tau_sk	h/Kc	h/Kc	0.00167668	12.7055	0.0163621	1.49427	0.902123	-0.750235		1538	0.487616	7297.07	h/Kc	u*/ws	h/Kc	0.00769699	2635.75	4.49697e-07	-3.03974	1.5198	3.33073
1539	0.490311	7347.5	h/Kc	tau_sk	h/Kc	0.00167668	12.7055	0.0163621	0.902123	1.49427	-0.750235		1539	0.487616	7297.07	u*/ws	h/Kc	h/Kc	0.00769699	2635.75	4.49697e-07	1.5198	-3.03974	3.33073
1540	0.490061	7326.4	Cf	S	tau	1.98481e-10	6.46247e-05	1.91655e+08	-1.55905	0.484783	1.08381		1540	0.487616	7297.07	u*/ws	h/Kc	u*/ws	38.5906	0.000529418	0.000446521	3.2003	0.290968	-1.68046
1541	0.490061	7326.4	Cf	tau	S	1.98481e-10	6.46247e-05	1.91655e+08	-1.55905	1.08381	0.484783		1541	0.487616	7297.07	h/Kc	u*/ws	u*/ws	38.5906	0.000529418	0.000446521	0.290968	3.2003	-1.68046
1542	0.490061	7326.4	S	tau	Cf	1.98481e-10	6.46247e-05	1.91655e+08	0.484783	1.08381	-1.55905		1542	0.487616	7297.07	u*/ws	u*/ws	h/Kc	38.5906	0.000529418	0.000446521	3.2003	-1.68046	0.290968
1543	0.490061	7326.4	S	Cf	tau	1.98481e-10	6.46247e-05	1.91655e+08	0.484783	-1.55905	1.08381		1543	0.489738	7321.68	Cf	S	tau	1.34803e-15	0.00181445	8.6263e+11	-1.5747	0.475087	1.07025
1544	0.490061	7326.4	tau	Cf	S	1.98481e-10	6.46247e-05	1.91655e+08	1.08381	-1.55905	0.484783		1544	0.489738	7321.68	S	Cf	tau	1.34803e-15	0.00181445	8.6263e+11	0.475087	-1.5747	1.07025
1545	0.490061	7326.4	tau	S	Cf	1.98481e-10	6.46247e-05	1.91655e+08	1.08381	0.484783	-1.55905		1545	0.489738	7321.68	Cf	tau	S	1.34803e-15	0.00181445	8.6263e+11	-1.5747	1.07025	0.475087
1546	0.490061	7326.4	S	tau	Fr	0.136459	0.00734067	0.00245436	-1.07426	1.0838	3.11808		1546	0.489738	7321.68	tau	Cf	S	1.34803e-15	0.00181445	8.6263e+11	1.07025	-1.5747	0.475087
1547	0.490061	7326.4	tau	S	Fr	0.136459	0.00734067	0.00245436	1.0838	-1.07426	3.11808		1547	0.489738	7321.68	S	tau	Cf	1.34803e-15	0.00181445	8.6263e+11	0.475087	1.07025	-1.5747
1548	0.490061	7326.4	Fr	S	tau	0.136459	0.00734067	0.00245436	3.11808	-1.07426	1.0838		1548	0.489738	7321.68	tau	S	Cf	1.34803e-15	0.00181445	8.6263e+11	1.07025	0.475087	-1.5747
1549	0.490061	7326.4	S	Fr	tau	0.136459	0.00734067	0.00245436	-1.07426	3.11808	1.0838		1549	0.489738	7321.68	Fr	h/Kc	tau	0.00782303	1.42935	0.0198163	0.950181	0.366535	1.07023
1550	0.490061	7326.4	Fr	tau	S	0.136459	0.00734067	0.00245436	3.11808	1.0838	-1.07426		1550	0.489738	7321.68	h/Kc	Fr	tau	0.00782303	1.42935	0.0198163	0.366535	0.950181	1.07023
1551	0.490061	7326.4	tau	Fr	S	0.136459	0.00734067	0.00245436	1.0838	3.11808	-1.07426		1551	0.489738	7321.68	Fr	tau	h/Kc	0.00782303	1.42935	0.0198163	0.950181	1.07023	0.366535
1552	0.490061	7326.41	Fr	Cf	tau	3.79677e-05	0.329451	0.196547	0.969592	-1.07426	1.08381		1552	0.489738	7321.68	tau	Fr	h/Kc	0.00782303	1.42935	0.0198163	1.07023	0.950181	0.366535
1553	0.490061	7326.41	Cf	Fr	tau	3.79677e-05	0.329451	0.196547	-1.07426	0.969592	1.08381		1553	0.489738	7321.68	h/Kc	tau	Fr	0.00782303	1.42935	0.0198163	0.366535	1.07023	0.950181
1554	0.490061	7326.41	Fr	tau	Cf	3.79677e-05	0.329451	0.196547	0.969592	1.08381	-1.07426		1554	0.489738	7321.68	tau	h/Kc	Fr	0.00782303	1.42935	0.0198163	1.07023	0.366535	0.950181
1555	0.490061	7326.41	tau	Fr	Cf	3.79677e-05	0.329451	0.196547	1.08381	0.969592	-1.07426		1555	0.489739	7321.68	h/Kc	S	tau	0.021707	0.214542	0.355419	0.524902	0.475099	1.07024
1556	0.490061	7326.41	Cf	tau	Fr	3.79677e-05	0.329451	0.196547	-1.07426	1.08381	0.969592		1556	0.489739	7321.68	S	h/Kc	tau	0.021707	0.214542	0.355419	0.475099	0.524902	1.07024
1557	0.490061	7326.41	tau	Cf	Fr	3.79677e-05	0.329451	0.196547	1.08381	-1.07426	0.969592		1557	0.489739	7321.68	h/Kc	tau	S	0.021707	0.214542	0.355419	0.524902	1.07024	0.475099
1558	0.489128	7266.68	Rep (u*_sk D)	Cf	u*/ws	5.62597e+07	7.27343e-11	2.84629e-05	0.192099	-0.904311	1.62006		1558	0.489739	7321.68	tau	h/Kc	S	0.021707	0.214542	0.355419	1.07024	0.524902	0.475099
1559	0.489128	7266.68	Cf	Rep (u*_sk D)	u*/ws	5.62597e+07	7.27343e-11	2.84629e-05	-0.904311	0.192099	1.62006		1559	0.489739	7321.68	S	tau	h/Kc	0.021707	0.214542	0.355419	0.475099	1.07024	0.524902
1560	0.489128	7266.68	u*/ws	Rep (u*_sk D)	Cf	5.62597e+07	7.27343e-11	2.84629e-05	1.62006	0.192099	-0.904311		1560	0.489739	7321.68	tau	S	h/Kc	0.021707	0.214542	0.355419	1.07024	0.475099	0.524902
1561	0.489128	7266.68	Cf	u*/ws	Rep (u*_sk D)	5.62597e+07	7.27343e-11	2.84629e-05	-0.904311	1.62006	0.192099		1561	0.489739	7321.68	Fr	Cf	tau	1.47484e-05	0.257968	0.554603	0.95017	-1.0996	1.07024
1562	0.489128	7266.68	u*/ws	Cf	Rep (u*_sk D)	5.62597e+07	7.27343e-11	2.84629e-05	1.62006	-0.904311	0.192099		1562	0.489739	7321.68	Cf	Fr	tau	1.47484e-05	0.257968	0.554603	-1.0996	0.95017	1.07024
1563	0.489128	7266.68	Rep (u*_sk D)	u*/ws	Cf	5.62597e+07	7.27343e-11	2.84629e-05	0.192099	1.62006	-0.904311		1563	0.489739	7321.68	Fr	tau	Cf	1.47484e-05	0.257968	0.554603	0.95017	1.07024	-1.0996
1564	0.489128	7266.68	h/Kc	Rep (u*_sk D)	u*/ws	2.02321	0.000474995	0.00556913	0.301432	0.192096	1.62003		1564	0.489739	7321.68	tau	Fr	Cf	1.47484e-05	0.257968	0.554603	1.07024	0.95017	-1.0996
1565	0.489128	7266.68	Rep (u*_sk D)	h/Kc	u*/ws	2.02321	0.000474995	0.00556913	0.192096	0.301432	1.62003		1565	0.489739	7321.68	Cf	tau	Fr	1.47484e-05	0.257968	0.554603	-1.0996	1.07024	0.95017
1566	0.489128	7266.68	h/Kc	u*/ws	Rep (u*_sk D)	2.02321	0.000474995	0.00556913	0.301432	1.62003	0.192096		1566	0.489739	7321.68	tau	Cf	Fr	1.47484e-05	0.257968	0.554603	1.07024	-1.0996	0.95017
1567	0.489128	7266.68	Rep (u*_sk D)	u*/ws	h/Kc	2.02321	0.000474995	0.00556913	0.192096	1.62003	0.301432		1567	0.489738	7321.68	Fr	tau	S	0.0181444	0.0246015	0.00472645	3.1494	1.07026	-1.09962
1568	0.489128	7266.68	u*/ws	Rep (u*_sk D)	h/Kc	2.02321	0.000474995	0.00556913	1.62003	0.192096	0.301432		1568	0.489738	7321.68	tau	Fr	S	0.0181444	0.0246015	0.00472645	1.07026	3.1494	-1.09962
1569	0.489128	7266.68	u*/ws	h/Kc	Rep (u*_sk D)	2.02321	0.000474995	0.00556913	1.62003	0.301432	0.192096		1569	0.489738	7321.68	Fr	S	tau	0.0181444	0.0246015	0.00472645	3.1494	-1.09962	1.07026
1570	0.487638	7297.39	Cf	Cf	u*/ws	1.8369e-19	1.58665e+14	0.00758235	3.22725	-4.1031	1.51997		1570	0.489738	7321.68	S	Fr	tau	0.0181444	0.0246015	0.00472645	-1.09962	3.1494	1.07026
1571	0.487638	7297.39	Cf	u*/ws	Cf	1.8369e-19	1.58665e+14	0.00758235	3.22725	1.51997	-4.1031		1571	0.489738	7321.68	S	tau	Fr	0.0181444	0.0246015	0.00472645	-1.09962	1.07026	3.1494
1572	0.487638	7297.39	u*/ws	Cf	Cf	1.8369e-19	1.58665e+14	0.00758235	1.51997	3.22725	-4.1031		1572	0.489738	7321.68	tau	S	Fr	0.0181444	0.0246015	0.00472645	1.07026	-1.09962	3.1494
1573	0.487638	7297.39	h/Kc	Cf	u*/ws	2.85313e-08	0.026685	98.0801	-0.0854464	-1.13219	1.51996		1573	0.489909	7341.61	Cf	tau_sk	tau_sk	2.22633e+60	8.1537e+45	2.32281e-111	-0.487439	58.4979	-57.0434
1574	0.487638	7297.39	Cf	h/Kc	u*/ws	2.85313e-08	0.026685	98.0801	-1.13219	-0.0854464	1.51996		1574	0.489909	7341.61	tau_sk	tau_sk	Cf	2.22633e+60	8.1537e+45	2.32281e-111	58.4979	-57.0434	-0.487439
1575	0.487638	7297.39	h/Kc	u*/ws	Cf	2.85313e-08	0.026685	98.0801	-0.0854464	1.51996	-1.13219		1575	0.489909	7341.61	tau_sk	Cf	tau_sk	2.22633e+60	8.1537e+45	2.32281e-111	58.4979	-0.487439	-57.0434
1576	0.487638	7297.39	u*/ws	h/Kc	Cf	2.85313e-08	0.026685	98.0801	1.51996	-0.0854464	-1.13219		1576	0.489909	7341.61	h/Kc	tau_sk	tau_sk	569.674	3696.88	1.57573e-10	0.162481	4.50103	-3.04654
1577	0.487638	7297.39	Cf	u*/ws	h/Kc	2.85313e-08	0.026685	98.0801	-1.13219	1.51996	-0.0854464		1577	0.489909	7341.61	tau_sk	h/Kc	tau_sk	569.674	3696.88	1.57573e-10	4.50103	0.162481	-3.04654
1578	0.487638	7297.39	u*/ws	Cf	h/Kc	2.85313e-08	0.026685	98.0801	1.51996	-1.13219	-0.0854464		1578	0.489909	7341.61	tau_sk	tau_sk	h/Kc	569.674	3696.88	1.57573e-10	4.50103	-3.04654	0.162481
1579	0.487638	7297.39	Cf	u*/ws	u*/ws	2236.36	6.48969e-06	1.52262e-05	-0.875848	5.99026	-4.47029		1579	0.489909	7341.61	h/Kc	Cf	tau_sk	275.491	9.74517e-08	0.144371	-0.187971	-1.05136	1.45449
1580	0.487638	7297.39	u*/ws	Cf	u*/ws	2236.36	6.48969e-06	1.52262e-05	5.99026	-0.875848	-4.47029		1580	0.489909	7341.61	Cf	h/Kc	tau_sk	275.491	9.74517e-08	0.144371	-1.05136	-0.187971	1.45449
1581	0.487638	7297.39	u*/ws	u*/ws	Cf	2236.36	6.48969e-06	1.52262e-05	5.99026	-4.47029	-0.875848		1581	0.489909	7341.61	h/Kc	tau_sk	Cf	275.491	9.74517e-08	0.144371	-0.187971	1.45449	-1.05136
1582	0.487638	7297.39	u*/ws	h/Kc	u*/ws	0.190595	5.39049e-05	0.876168	-5.40454	0.29195	6.92449		1582	0.489909	7341.61	tau_sk	h/Kc	Cf	275.491	9.74517e-08	0.144371	1.45449	-0.187971	-1.05136
1583	0.487638	7297.39	u*/ws	u*/ws	h/Kc	0.190595	5.39049e-05	0.876168	-5.40454	6.92449	0.29195		1583	0.489909	7341.61	Cf	tau_sk	h/Kc	275.491	9.74517e-08	0.144371	-1.05136	1.45449	-0.187971
1584	0.487638	7297.39	h/Kc	u*/ws	u*/ws	0.190595	5.39049e-05	0.876168	0.29195	-5.40454	6.92449		1584	0.489909	7341.61	tau_sk	Cf	h/Kc	275.491	9.74517e-08	0.144371	1.45449	-1.05136	-0.187971
1585	0.487638	7297.39	u*/ws	h/Kc	h/Kc	4.46508	80.4561	2.50557e-08	1.51996	-1.80491	2.09687		1585	0.489909	7341.61	h/Kc	h/Kc	tau_sk	0.00755989	1.4656	0.029951	0.216304	-0.053825	1.45447
1586	0.487638	7297.39	h/Kc	h/Kc	u*/ws	4.46508	80.4561	2.50557e-08	-1.80491	2.09687	1.51996		1586	0.489909	7341.61	h/Kc	tau_sk	h/Kc	0.00755989	1.4656	0.029951	0.216304	1.45447	-0.053825
1587	0.487638	7297.39	h/Kc	u*/ws	h/Kc	4.46508	80.4561	2.50557e-08	-1.80491	1.51996	2.09687		1587	0.489909	7341.61	tau_sk	h/Kc	h/Kc	0.00755989	1.4656	0.029951	1.45447	0.216304	-0.053825
1588	0.484358	7367.62	did50	Fr	tau	0.413788	2529.75	8.24387e-06	-1.69329	1.90767	-0.145993		1588	0.489909	7341.61	Cf	Cf	tau_sk	4.76407	0.00238635	0.00370887	-1.71002	1.22258	1.45453
1589	0.484358	7367.62	Fr	did50	tau	0.413788	2529.75	8.24387e-06	1.90767	-1.69329	-0.145993		1589	0.489909	7341.61	Cf	tau_sk	Cf	4.76407	0.00238635	0.00370887	-1.71002	1.45453	1.22258
1590	0.484358	7367.62	did50	tau	Fr	0.413788	2529.75	8.24387e-06	-1.69329	-0.145993	1.90767		1590	0.489909	7341.61	tau_sk	Cf	Cf	4.76407	0.00238635	0.00370887	1.45453	-1.71002	1.22258
1591	0.484358	7367.62	tau	did50	Fr	0.413788	2529.75	8.24387e-06	-0.145993	-1.69329	1.90767		1591	0.494586	7343.09	Fr	tau_sk	tau	1.4182	0.0124878	0.116347	0.524984	1.39198	-0.199449
1592	0.484358	7367.62	tau	Fr	did50	0.413788	2529.75	8.24387e-06	-0.145993	1.90767	-1.69329		1592	0.494586	7343.09	Fr	tau	tau_sk	1.4182	0.0124878	0.116347	0.524984	-0.199449	1.39198
1593	0.484358	7367.62	Fr	tau	did50	0.413788	2529.75	8.24387e-06	1.90767	-0.145993	-1.69329		1593	0.494586	7343.09	tau	Fr	tau_sk	1.4182	0.0124878	0.116347	-0.199449	0.524984	1.39198
1594	0.484128	7422.75	h/Kc	S	tau	0.102884	0.326005	0.167671	0.52788	0.601221	1.00807		1594	0.494586	7343.09	tau_sk	tau	Fr	1.4182	0.0124878	0.116347	1.39198	-0.199449	0.524984
1595	0.484128	7422.75	S	h/Kc	tau	0.102884	0.326005	0.167671	0.601221	0.52788	1.00807		1595	0.494586	7343.09	tau	tau_sk	Fr	1.4182	0.0124878	0.116347	-0.199449	1.39198	0.524984
1596	0.484128	7422.75	h/Kc	tau	S	0.102884	0.326005	0.167671	0.52788	1.00807	0.601221		1596	0.494586	7343.09	tau_sk	Fr	tau	1.4182	0.0124878	0.116347	1.39198	0.524984	-0.199449
1597	0.484128	7422.75	tau	h/Kc	S	0.102884	0.326005	0.167671	1.00807	0.52788	0.601221		1597	0.47752	7346.66	S	S	u*/ws	6.03345e+07	7.44092e-09	0.0107328	6.74746	-6.20859	1.58264
1598	0.484128	7422.75	S	tau	h/Kc	0.102884	0.326005	0.167671	0.601221	1.00807	0.52788		1598	0.47752	7346.66	S	u*/ws	S	6.03345e+07	7.44092e-09	0.0107328	6.74746	1.58264	-6.20859
1599	0.484128	7422.75	tau	S	h/Kc	0.102884	0.326005	0.167671	1.00807	0.601221	0.52788		1599	0.47752	7346.66	u*/ws	S	S	6.03345e+07	7.44092e-09	0.0107328	1.58264	6.74746	-6.20859
1600	0.482137	7464.64	h/Kc	h/D50	tau	53.4873	7.23725e-07	32.3213	0.505859	-0.416414	1.18353		1600	0.477519	7346.66	S	u*/ws	u*/ws	0.790514	0.618241	0.009859	0.538874	2.28343	-0.700794
1601	0.482137	7464.64	h/D50	h/Kc	tau	53.4873	7.23725e-07	32.3213	-0.416414	0.505859	1.18353		1601	0.477519	7346.66	u*/ws	S	u*/ws	0.790514	0.618241	0.009859	2.28343	0.538874	-0.700794
1602	0.482137	7464.64	h/Kc	tau	h/D50	53.4873	7.23725e-07	32.3213	0.505859	1.18353	-0.416414		1602	0.477519	7346.66	u*/ws	u*/ws	S	0.790514	0.618241	0.009859	2.28343	-0.700794	0.538874
1603	0.482137	7464.64	tau	h/Kc	h/D50	53.4873	7.23725e-07	32.3213	1.18353	0.505859	-0.416414		1603	0.470438	7350.12	S	Rep (u*_sk D)	tau	2.1204	1.40812	7.8503	0.766501	-2.28351	-0.0125759
1604	0.482137	7464.64	h/D50	tau	h/Kc	53.4873	7.23725e-07	32.3213	-0.416414	1.18353	0.505859		1604	0.470438	7350.12	Rep (u*_sk D)	tau	S	2.1204	1.40812	7.8503	-2.28351	-0.0125759	0.766501
1605	0.482137	7464.64	tau	h/D50	h/Kc	53.4873	7.23725e-07	32.3213	1.18353	-0.416414	0.505859		1605	0.470438	7350.12	tau	Rep (u*_sk D)	S	2.1204	1.40812	7.8503	-0.0125759	-2.28351	0.766501
1606	0.482137	7464.64	h/D50	Cf	tau	8303.42	7.36454e-05	3.32175e-06	-0.416412	-1.51757	1.18355		1606	0.470438	7350.12	tau	S	Rep (u*_sk D)	2.1204	1.40812	7.8503	-0.0125759	0.766501	-2.28351
1607	0.482137	7464.64	Cf	h/D50	tau	8303.42	7.36454e-05	3.32175e-06	-1.51757	-0.416412	1.18355		1607	0.470438	7350.12	Rep (u*_sk D)	S	tau	2.1204	1.40812	7.8503	-2.28351	0.766501	-0.0125759
1608	0.482137	7464.64	h/D50	tau	Cf	8303.42	7.36454e-05	3.32175e-06	-0.416412	1.18355	-1.51757		1608	0.470438	7350.12	S	tau	Rep (u*_sk D)	2.1204	1.40812	7.8503	0.766501	-0.0125759	-2.28351
1609	0.482137	7464.64	tau	h/D50	Cf	8303.42	7.36454e-05	3.32175e-06	1.18355	-0.416412	-1.51757		1609	0.470414	7350.48	Rep (u*_sk D)	S	S	9916.14	684.185	3.27374e-06	-2.27871	0.906602	-0.143955
1610	0.482137	7464.64	Cf	tau	h/D50	8303.42	7.36454e-05	3.32175e-06	-1.51757	1.18355	-0.416412		1610	0.470414	7350.48	S	Rep (u*_sk D)	S	9916.14	684.185	3.27374e-06	0.906602	-2.27871	-0.143955
1611	0.482137	7464.64	tau	Cf	h/D50	8303.42	7.36454e-05	3.32175e-06	1.18355	-1.51757	-0.416412		1611	0.470414	7350.48	S	S	Rep (u*_sk D)	9916.14	684.185	3.27374e-06	0.906602	-0.143955	-2.27871
1612	0.481683	7427.29	did50	did50	Fr	15.8655	7.14175e-13	6.56416e+08	-0.55169	-0.998343	1.85924		1612	0.470414	7350.48	Rep (u*_sk D)	S	Rep (u*_sk D)	0.154029	4.04742	35.6295	-1.92005	0.762653	-0.358657
1613	0.481683	7427.29	did50	Fr	did50	15.8655	7.14175e-13	6.56416e+08	-0.55169	1.85924	-0.998343		1613	0.470414	7350.48	Rep (u*_sk D)	Rep (u*_sk D)	S	0.154029	4.04742	35.6295	-1.92005	-0.358657	0.762653
1614	0.481683	7427.29	Fr	did50	did50	15.8655	7.14175e-13	6.56416e+08	1.85924	-0.55169	-0.998343		1614	0.470414	7350.48	S	Rep (u*_sk D)	Rep (u*_sk D)	0.154029	4.04742	35.6295	0.762653	-1.92005	-0.358657
1615	0.481683	7427.29	did50	Fr	Fr	1.89836e-11	18456.4	21228.1	-1.55002	-3.74596	5.6052		1615	0.484034	7362.85	tau	did50	Fr	6.11723	16.1629	9.17998e-05	-0.184273	-1.74117	1.9169
1616	0.481683	7427.29	Fr	did50	Fr	1.89836e-11	18456.4	21228.1	-3.74596	-1.55002	5.6052		1616	0.484034	7362.85	tau	Fr	did50	6.11723	16.1629	9.17998e-05	-0.184273	1.9169	-1.74117
1617	0.481683	7427.29	Fr	Fr	did50	1.89836e-11	18456.4	21228.1	-3.74596	5.6052	-1.55002		1617	0.484034	7362.85	did50	Fr	tau	6.11723	16.1629	9.17998e-05	-1.74117	1.9169	-0.184273
1618	0.48018	7391.3	Rep (u*_sk D)	Cf	tau	2230.46	1.73803e-08	0.0237097	-1.07168	-1.22245	1.14794		1618	0.484034	7362.85	Fr	did50	tau	6.11723	16.1629	9.17998e-05	1.9169	-1.74117	-0.184273
1619	0.48018	7391.3	Cf	tau	Rep (u*_sk D)	2230.46	1.73803e-08	0.0237097	-1.22245	1.14794	-1.07168		1619	0.484034	7362.85	did50	tau	Fr	6.11723	16.1629	9.17998e-05	-1.74117	-0.184273	1.9169
1620	0.48018	7391.3	tau	Cf	Rep (u*_sk D)	2230.46	1.73803e-08	0.0237097	1.14794	-1.22245	-1.07168		1620	0.484034	7362.85	Fr	tau	did50	6.11723	16.1629	9.17998e-05	1.9169	-0.184273	-1.74117
1621	0.48018	7391.3	Cf	Rep (u*_sk D)	tau	2230.46	1.73803e-08	0.0237097	-1.22245	-1.07168	1.14794		1621	0.469157	7367.89	S	Rep (u*_sk D)	did50	27.0207	0.601378	2.83066	0.813089	-2.384	0.19533
1622	0.48018	7391.3	Rep (u*_sk D)	tau	Cf	2230.46	1.73803e-08	0.0237097	-1.07168	1.14794	-1.22245		1622	0.469157	7367.89	did50	Rep (u*_sk D)	S	27.0207	0.601378	2.83066	0.19533	-2.384	0.813089
1623	0.48018	7391.3	tau	Rep (u*_sk D)	Cf	2230.46	1.73803e-08	0.0237097	1.14794	-1.07168	-1.22245		1623	0.469157	7367.89	Rep (u*_sk D)	did50	S	27.0207	0.601378	2.83066	-2.384	0.19533	0.813089
1624	0.48018	7391.3	h/Kc	tau	Rep (u*_sk D)	152.645	0.522515	2.0352e-06	0.407486	1.14793	-1.07163		1624	0.469157	7367.89	did50	S	Rep (u*_sk D)	27.0207	0.601378	2.83066	0.19533	0.813089	-2.384
1625	0.48018	7391.3	tau	h/Kc	Rep (u*_sk D)	152.645	0.522515	2.0352e-06	1.14793	0.407486	-1.07163		1625	0.469157	7367.89	S	did50	Rep (u*_sk D)	27.0207	0.601378	2.83066	0.813089	0.19533	-2.384
1626	0.48018	7391.3	tau	Rep (u*_sk D)	h/Kc	152.645	0.522515	2.0352e-06	1.14793	-1.07163	0.407486		1626	0.469157	7367.89	Rep (u*_sk D)	S	did50	27.0207	0.601378	2.83066	-2.384	0.813089	0.19533
1627	0.48018	7391.3	h/Kc	Rep (u*_sk D)	tau	152.645	0.522515	2.0352e-06	0.407486	-1.07163	1.14793		1627	0.494305	7386.87	Fr	Fr	tau_sk	535.014	0.0154123	0.000278939	3.16397	-2.47896	1.24995
1628	0.48018	7391.3	Rep (u*_sk D)	h/Kc	tau	152.645	0.522515	2.0352e-06	-1.07163	0.407486	1.14793		1628	0.494305	7386.87	Fr	tau_sk	Fr	535.014	0.0154123	0.000278939	3.16397	1.24995	-2.47896
1629	0.48018	7391.3	Rep (u*_sk D)	tau	h/Kc	152.645	0.522515	2.0352e-06	-1.07163	1.14793	0.407486		1629	0.494305	7386.87	tau_sk	Fr	Fr	535.014	0.0154123	0.000278939	1.24995	3.16397	-2.47896
1630	0.478767	7435.24	Rep (u*_sk D)	Rep (u*D)	Rep	165423	21.2344	4.84444e-09	1.36338	-2.7006	-0.189373		1630	0.494305	7386.87	Fr	tau_sk	tau_sk	2.43928	0.0133978	0.0703805	0.685017	0.794377	0.455553
1631	0.478767	7435.24	Rep (u*D)	Rep (u*_sk D)	Rep	165423	21.2344	4.84444e-09	-2.7006	1.36338	-0.189373		1631	0.494305	7386.87	tau_sk	Fr	tau_sk	2.43928	0.0133978	0.0703805	0.794377	0.685017	0.455553
1632	0.478767	7435.24	Rep (u*_sk D)	Rep	Rep (u*D)	165423	21.2344	4.84444e-09	1.36338	-0.189373	-2.7006		1632	0.494305	7386.87	tau_sk	tau_sk	Fr	2.43928	0.0133978	0.0703805	0.794377	0.455553	0.685017
1633	0.478767	7435.24	Rep	Rep (u*_sk D)	Rep (u*D)	165423	21.2344	4.84444e-09	-0.189373	1.36338	-2.7006		1633	0.480158	7390.99	Rep (u*_sk D)	Cf	tau	103.493	6.84216e-06	0.00130745	-1.08286	-1.22407	1.15392
1634	0.478767	7435.24	Rep (u*D)	Rep	Rep (u*_sk D)	165423	21.2344	4.84444e-09	-2.7006	-0.189373	1.36338		1634	0.480158	7390.99	Cf	Rep (u*_sk D)	tau	103.493	6.84216e-06	0.00130745	-1.22407	-1.08286	1.15392
1635	0.478767	7435.24	Rep	Rep (u*D)	Rep (u*_sk D)	165423	21.2344	4.84444e-09	-0.189373	-2.7006	1.36338		1635	0.480158	7390.99	Rep (u*_sk D)	tau	Cf	103.493	6.84216e-06	0.00130745	-1.08286	1.15392	-1.22407
1636	0.477894	7352.1	S	S	u*/ws	1485.7	3.4781e-05	0.0911735	3.82877	-3.29499	1.55048		1636	0.480158	7390.99	tau	Rep (u*_sk D)	Cf	103.493	6.84216e-06	0.00130745	1.15392	-1.08286	-1.22407
1637	0.477894	7352.1	S	u*/ws	S	1485.7	3.4781e-05	0.0911735	3.82877	1.55048	-3.29499		1637	0.480158	7390.99	Cf	tau	Rep (u*_sk D)	103.493	6.84216e-06	0.00130745	-1.22407	1.15392	-1.08286
1638	0.477894	7352.1	u*/ws	S	S	1485.7	3.4781e-05	0.0911735	1.55048	3.82877	-3.29499		1638	0.480158	7390.99	tau	Cf	Rep (u*_sk D)	103.493	6.84216e-06	0.00130745	1.15392	-1.22407	-1.08286
1639	0.477894	7352.1	u*/ws	u*/ws	S	6.22372e+06	3.6049e-08	0.0209991	-10.4795	12.03	0.533776		1639	0.480158	7390.99	Rep (u*_sk D)	h/Kc	tau	0.00621477	5.93915	0.00446127	-1.0829	0.408013	1.15391
1640	0.477894	7352.1	S	u*/ws	u*/ws	6.22372e+06	3.6049e-08	0.0209991	0.533776	-10.4795	12.03		1640	0.480158	7390.99	h/Kc	tau	Rep (u*_sk D)	0.00621477	5.93915	0.00446127	0.408013	1.15391	-1.0829
1641	0.477894	7352.1	u*/ws	S	u*/ws	6.22372e+06	3.6049e-08	0.0209991	-10.4795	0.533776	12.03		1641	0.480158	7390.99	tau	h/Kc	Rep (u*_sk D)	0.00621477	5.93915	0.00446127	1.15391	0.408013	-1.0829
1642	0.476683	7500.3	Fr	h/Kc	tau	0.0138257	0.694075	0.0476789	1.08295	0.302088	0.777574		1642	0.480158	7390.99	tau	Rep (u*_sk D)	h/Kc	0.00621477	5.93915	0.00446127	1.15391	-1.0829	0.408013
1643	0.476683	7500.3	h/Kc	Fr	tau	0.0138257	0.694075	0.0476789	0.302088	1.08295	0.777574		1643	0.480158	7390.99	h/Kc	Rep (u*_sk D)	tau	0.00621477	5.93915	0.00446127	0.408013	-1.0829	1.15391
1644	0.476683	7500.3	Fr	tau	h/Kc	0.0138257	0.694075	0.0476789	1.08295	0.777574	0.302088		1644	0.480158	7390.99	Rep (u*_sk D)	tau	h/Kc	0.00621477	5.93915	0.00446127	-1.0829	1.15391	0.408013
1645	0.476683	7500.3	tau	Fr	h/Kc	0.0138257	0.694075	0.0476789	0.777574	1.08295	0.302088		1645	0.467675	7424.59	h/D50	Rep (u*_sk D)	u*/ws	0.0268477	0.00399326	412.499	-0.804363	0.221076	1.91468
1646	0.476683	7500.3	h/Kc	tau	Fr	0.0138257	0.694075	0.0476789	0.302088	0.777574	1.08295		1646	0.467675	7424.59	h/D50	u*/ws	Rep (u*_sk D)	0.0268477	0.00399326	412.499	-0.804363	1.91468	0.221076
1647	0.476683	7500.3	tau	h/Kc	Fr	0.0138257	0.694075	0.0476789	0.777574	0.302088	1.08295		1647	0.467675	7424.59	Rep (u*_sk D)	h/D50	u*/ws	0.0268477	0.00399326	412.499	0.221076	-0.804363	1.91468
1648	0.47668	7462.96	Rep (u*_sk D)	Rep (u*_sk D)	Rep (u*D)	0.0107246	16.1592	0.137254	1.19262	0.280991	-3.03584		1648	0.467675	7424.59	u*/ws	h/D50	Rep (u*_sk D)	0.0268477	0.00399326	412.499	1.91468	-0.804363	0.221076
1649	0.47668	7462.96	Rep (u*_sk D)	Rep (u*D)	Rep (u*_sk D)	0.0107246	16.1592	0.137254	1.19262	-3.03584	0.280991		1649	0.467675	7424.59	Rep (u*_sk D)	u*/ws	h/D50	0.0268477	0.00399326	412.499	0.221076	1.91468	-0.804363
1650	0.47668	7462.96	Rep (u*D)	Rep (u*_sk D)	Rep (u*_sk D)	0.0107246	16.1592	0.137254	-3.03584	1.19262	0.280991		1650	0.467675	7424.59	u*/ws	Rep (u*_sk D)	h/D50	0.0268477	0.00399326	412.499	1.91468	0.221076	-0.804363
1651	0.47668	7462.95	Rep (u*_sk D)	Rep (u*D)	Rep (u*D)	0.00771075	19.658	0.15692	1.47366	0.168601	-3.20447		1651	0.481517	7424.9	did50	Fr	Fr	4.77111e-10	11643.3	1350.18	-1.56145	-2.80685	4.66033
1652	0.47668	7462.95	Rep (u*D)	Rep (u*D)	Rep (u*_sk D)	0.00771075	19.658	0.15692	0.168601	-3.20447	1.47366		1652	0.481517	7424.9	Fr	did50	Fr	4.77111e-10	11643.3	1350.18	-2.80685	-1.56145	4.66033
1653	0.47668	7462.95	Rep (u*D)	Rep (u*_sk D)	Rep (u*D)	0.00771075	19.658	0.15692	0.168601	1.47366	-3.20447		1653	0.481517	7424.9	Fr	Fr	did50	4.77111e-10	11643.3	1350.18	-2.80685	4.66033	-1.56145
1654	0.471774	7556.71	did50	Fr	S	182.309	2.93003	5.39962e-06	-1.24909	3.24936	-0.398424		1654	0.481517	7424.9	did50	Fr	did50	156.758	3.51648e-09	13606.5	0.0862486	1.85348	-1.64769
1655	0.471774	7556.71	Fr	did50	S	182.309	2.93003	5.39962e-06	3.24936	-1.24909	-0.398424		1655	0.481517	7424.9	Fr	did50	did50	156.758	3.51648e-09	13606.5	1.85348	0.0862486	-1.64769
1656	0.471774	7556.71	did50	S	Fr	182.309	2.93003	5.39962e-06	-1.24909	-0.398424	3.24936		1656	0.481517	7424.9	did50	did50	Fr	156.758	3.51648e-09	13606.5	0.0862486	-1.64769	1.85348
1657	0.471774	7556.71	S	did50	Fr	182.309	2.93003	5.39962e-06	-0.398424	-1.24909	3.24936		1657	0.481816	7459.96	h/Kc	h/D50	tau	1.07044	0.000202833	5.10585	0.509124	-0.403304	1.1663
1658	0.471774	7556.71	Fr	S	did50	182.309	2.93003	5.39962e-06	3.24936	-0.398424	-1.24909		1658	0.481816	7459.96	h/D50	h/Kc	tau	1.07044	0.000202833	5.10585	-0.403304	0.509124	1.1663
1659	0.471774	7556.71	S	Fr	did50	182.309	2.93003	5.39962e-06	-0.398424	3.24936	-1.24909		1659	0.481816	7459.96	h/Kc	tau	h/D50	1.07044	0.000202833	5.10585	0.509124	1.1663	-0.403304
1660	0.470724	7354.25	Rep (u*_sk D)	S	tau	2.86389	2.66106	2.43877	-2.22422	0.752942	-0.0113047		1660	0.481816	7459.96	tau	h/Kc	h/D50	1.07044	0.000202833	5.10585	1.1663	0.509124	-0.403304
1661	0.470724	7354.25	S	Rep (u*_sk D)	tau	2.86389	2.66106	2.43877	0.752942	-2.22422	-0.0113047		1661	0.481816	7459.96	h/D50	tau	h/Kc	1.07044	0.000202833	5.10585	-0.403304	1.1663	0.509124
1662	0.470724	7354.25	Rep (u*_sk D)	tau	S	2.86389	2.66106	2.43877	-2.22422	-0.0113047	0.752942		1662	0.481816	7459.96	tau	h/D50	h/Kc	1.07044	0.000202833	5.10585	1.1663	-0.403304	0.509124
1663	0.470724	7354.25	tau	Rep (u*_sk D)	S	2.86389	2.66106	2.43877	-0.0113047	-2.22422	0.752942		1663	0.481816	7459.96	Cf	tau	h/D50	1141.59	0.000720605	2.09941e-06	-1.52734	1.16627	-0.403301
1664	0.470724	7354.25	S	tau	Rep (u*_sk D)	2.86389	2.66106	2.43877	0.752942	-0.0113047	-2.22422		1664	0.481816	7459.96	h/D50	Cf	tau	1141.59	0.000720605	2.09941e-06	-0.403301	-1.52734	1.16627
1665	0.470724	7354.25	tau	S	Rep (u*_sk D)	2.86389	2.66106	2.43877	-0.0113047	0.752942	-2.22422		1665	0.481816	7459.96	Cf	h/D50	tau	1141.59	0.000720605	2.09941e-06	-1.52734	-0.403301	1.16627
1666	0.470704	7354.66	Rep (u*_sk D)	S	S	16701.3	501.024	2.11482e-06	-2.21948	0.979877	-0.230385		1666	0.481816	7459.96	h/D50	tau	Cf	1141.59	0.000720605	2.09941e-06	-0.403301	1.16627	-1.52734
1667	0.470704	7354.66	S	Rep (u*_sk D)	S	16701.3	501.024	2.11482e-06	0.979877	-2.21948	-0.230385		1667	0.481816	7459.96	tau	h/D50	Cf	1141.59	0.000720605	2.09941e-06	1.16627	-0.403301	-1.52734
1668	0.470704	7354.66	S	S	Rep (u*_sk D)	16701.3	501.024	2.11482e-06	0.979877	-0.230385	-2.21948		1668	0.481816	7459.96	tau	Cf	h/D50	1141.59	0.000720605	2.09941e-06	1.16627	-1.52734	-0.403301
1669	0.470704	7354.67	Rep (u*_sk D)	Rep (u*_sk D)	S	0.153058	5.47028	21.1372	-1.67808	-0.541385	0.749502		1669	0.476567	7461.25	Rep (u*D)	Rep (u*D)	Rep (u*_sk D)	0.0122684	11.787	0.153416	0.36543	-3.3725	1.47552
1670	0.470704	7354.67	Rep (u*_sk D)	S	Rep (u*_sk D)	0.153058	5.47028	21.1372	-1.67808	0.749502	-0.541385		1670	0.476567	7461.25	Rep (u*_sk D)	Rep (u*D)	Rep (u*D)	0.0122684	11.787	0.153416	1.47552	0.36543	-3.3725
1671	0.470704	7354.67	S	Rep (u*_sk D)	Rep (u*_sk D)	0.153058	5.47028	21.1372	0.749502	-1.67808	-0.541385		1671	0.476567	7461.25	Rep (u*D)	Rep (u*_sk D)	Rep (u*D)	0.0122684	11.787	0.153416	0.36543	1.47552	-3.3725
1672	0.470576	7702.25	tau	S	tau_sk	0.000779271	8.68641e-08	5.19661e+07	-0.355419	0.137507	1.72612		1672	0.476567	7461.25	Rep (u*D)	Rep (u*_sk D)	Rep (u*_sk D)	0.00895019	15.6921	0.157972	-3.00715	1.22035	0.255225
1673	0.470576	7702.25	tau	tau_sk	S	0.000779271	8.68641e-08	5.19661e+07	-0.355419	1.72612	0.137507		1673	0.476567	7461.25	Rep (u*_sk D)	Rep (u*_sk D)	Rep (u*D)	0.00895019	15.6921	0.157972	1.22035	0.255225	-3.00715
1674	0.470576	7702.25	S	tau_sk	tau	0.000779271	8.68641e-08	5.19661e+07	0.137507	1.72612	-0.355419		1674	0.476567	7461.25	Rep (u*_sk D)	Rep (u*D)	Rep (u*_sk D)	0.00895019	15.6921	0.157972	1.22035	-3.00715	0.255225
1675	0.470576	7702.25	tau_sk	S	tau	0.000779271	8.68641e-08	5.19661e+07	1.72612	0.137507	-0.355419		1675	0.469731	7566.55	Cf	did50	Rep (u*D)	0.000987425	0.417352	1.87694	-0.386081	-0.890026	-1.49773
1676	0.470576	7702.25	S	tau	tau_sk	0.000779271	8.68641e-08	5.19661e+07	0.137507	-0.355419	1.72612		1676	0.469731	7566.55	Rep (u*D)	Cf	did50	0.000987425	0.417352	1.87694	-1.49773	-0.386081	-0.890026
1677	0.470576	7702.25	tau_sk	tau	S	0.000779271	8.68641e-08	5.19661e+07	1.72612	-0.355419	0.137507		1677	0.469731	7566.55	Cf	Rep (u*D)	did50	0.000987425	0.417352	1.87694	-0.386081	-1.49773	-0.890026
1678	0.46984	7568.11	did50	Rep (u*D)	Cf	0.000448934	0.0565465	25.8021	-0.901342	-1.49231	-0.413395		1678	0.469731	7566.55	did50	Rep (u*D)	Cf	0.000987425	0.417352	1.87694	-0.890026	-1.49773	-0.386081
1679	0.46984	7568.11	Rep (u*D)	did50	Cf	0.000448934	0.0565465	25.8021	-1.49231	-0.901342	-0.413395		1679	0.469731	7566.55	did50	Cf	Rep (u*D)	0.000987425	0.417352	1.87694	-0.890026	-0.386081	-1.49773
1680	0.46984	7568.11	did50	Cf	Rep (u*D)	0.000448934	0.0565465	25.8021	-0.901342	-0.413395	-1.49231		1680	0.469731	7566.55	Rep (u*D)	did50	Cf	0.000987425	0.417352	1.87694	-1.49773	-0.890026	-0.386081
1681	0.46984	7568.11	Cf	did50	Rep (u*D)	0.000448934	0.0565465	25.8021	-0.413395	-0.901342	-1.49231		1681	0.469731	7566.55	did50	h/Kc	Rep (u*D)	0.000888409	0.00267089	1670.57	-0.890025	0.128694	-1.49774
1682	0.46984	7568.11	Rep (u*D)	Cf	did50	0.000448934	0.0565465	25.8021	-1.49231	-0.413395	-0.901342		1682	0.469731	7566.55	h/Kc	did50	Rep (u*D)	0.000888409	0.00267089	1670.57	0.128694	-0.890025	-1.49774
1683	0.46984	7568.11	Cf	Rep (u*D)	did50	0.000448934	0.0565465	25.8021	-0.413395	-1.49231	-0.901342		1683	0.469731	7566.55	Rep (u*D)	h/Kc	did50	0.000888409	0.00267089	1670.57	-1.49774	0.128694	-0.890025
1684	0.46984	7568.11	did50	Rep (u*D)	h/Kc	0.000405038	0.00692596	1343.28	-0.901351	-1.49232	0.137797		1684	0.469731	7566.55	did50	Rep (u*D)	h/Kc	0.000888409	0.00267089	1670.57	-0.890025	-1.49774	0.128694
1685	0.46984	7568.11	Rep (u*D)	did50	h/Kc	0.000405038	0.00692596	1343.28	-1.49232	-0.901351	0.137797		1685	0.469731	7566.55	Rep (u*D)	did50	h/Kc	0.000888409	0.00267089	1670.57	-1.49774	-0.890025	0.128694
1686	0.46984	7568.11	h/Kc	Rep (u*D)	did50	0.000405038	0.00692596	1343.28	0.137797	-1.49232	-0.901351		1686	0.469731	7566.55	h/Kc	Rep (u*D)	did50	0.000888409	0.00267089	1670.57	0.128694	-1.49774	-0.890025
1687	0.46984	7568.11	Rep (u*D)	h/Kc	did50	0.000405038	0.00692596	1343.28	-1.49232	0.137797	-0.901351		1687	0.454591	7580.25	h/D50	Rep (u*D)	u*/ws	0.343951	0.0277205	73.3782	-0.982289	-0.166	1.79246
1688	0.46984	7568.11	did50	h/Kc	Rep (u*D)	0.000405038	0.00692596	1343.28	-0.901351	0.137797	-1.49232		1688	0.454591	7580.25	Rep (u*D)	h/D50	u*/ws	0.343951	0.0277205	73.3782	-0.166	-0.982289	1.79246
1689	0.46984	7568.11	h/Kc	did50	Rep (u*D)	0.000405038	0.00692596	1343.28	0.137797	-0.901351	-1.49232		1689	0.454591	7580.25	h/D50	u*/ws	Rep (u*D)	0.343951	0.0277205	73.3782	-0.982289	1.79246	-0.166
1690	0.469275	7373.58	did50	Rep (u*_sk D)	S	11.4196	1.16086	2.98657	0.210234	-2.3354	0.805506		1690	0.454591	7580.25	u*/ws	h/D50	Rep (u*D)	0.343951	0.0277205	73.3782	1.79246	-0.982289	-0.166
1691	0.469275	7373.58	Rep (u*_sk D)	did50	S	11.4196	1.16086	2.98657	-2.3354	0.210234	0.805506		1691	0.454591	7580.25	Rep (u*D)	u*/ws	h/D50	0.343951	0.0277205	73.3782	-0.166	1.79246	-0.982289
1692	0.469275	7373.58	S	did50	Rep (u*_sk D)	11.4196	1.16086	2.98657	0.805506	0.210234	-2.3354		1692	0.454591	7580.25	u*/ws	Rep (u*D)	h/D50	0.343951	0.0277205	73.3782	1.79246	-0.166	-0.982289
1693	0.469275	7373.58	did50	S	Rep (u*_sk D)	11.4196	1.16086	2.98657	0.210234	0.805506	-2.3354		1693	0.464767	7590.67	did50	h/Kc	tau	440968	1.39047e-07	0.000190799	-1.17998	0.540872	0.975036
1694	0.469275	7373.58	Rep (u*_sk D)	S	did50	11.4196	1.16086	2.98657	-2.3354	0.805506	0.210234		1694	0.464767	7590.67	h/Kc	did50	tau	440968	1.39047e-07	0.000190799	0.540872	-1.17998	0.975036
1695	0.469275	7373.58	S	Rep (u*_sk D)	did50	11.4196	1.16086	2.98657	0.805506	-2.3354	0.210234		1695	0.464767	7590.67	did50	tau	h/Kc	440968	1.39047e-07	0.000190799	-1.17998	0.975036	0.540872
1696	0.468097	7813.63	h/D50	S	tau_sk	0.00649708	0.456127	0.693379	-0.509968	-0.434311	1.60222		1696	0.464767	7590.67	tau	did50	h/Kc	440968	1.39047e-07	0.000190799	0.975036	-1.17998	0.540872
1697	0.468097	7813.63	S	h/D50	tau_sk	0.00649708	0.456127	0.693379	-0.434311	-0.509968	1.60222		1697	0.464767	7590.67	h/Kc	tau	did50	440968	1.39047e-07	0.000190799	0.540872	0.975036	-1.17998
1698	0.468097	7813.63	h/D50	tau_sk	S	0.00649708	0.456127	0.693379	-0.509968	1.60222	-0.434311		1698	0.464767	7590.67	tau	h/Kc	did50	440968	1.39047e-07	0.000190799	0.975036	0.540872	-1.17998
1699	0.468097	7813.63	tau_sk	h/D50	S	0.00649708	0.456127	0.693379	1.60222	-0.509968	-0.434311		1699	0.464767	7590.67	did50	Cf	tau	8.8556e-22	4.74657e-07	2.89712e+19	-1.18004	-1.6226	0.975006
1700	0.468097	7813.63	S	tau_sk	h/D50	0.00649708	0.456127	0.693379	-0.434311	1.60222	-0.509968		1700	0.464767	7590.67	Cf	did50	tau	8.8556e-22	4.74657e-07	2.89712e+19	-1.6226	-1.18004	0.975006
1701	0.468097	7813.63	tau_sk	S	h/D50	0.00649708	0.456127	0.693379	1.60222	-0.434311	-0.509968		1701	0.464767	7590.67	tau	did50	Cf	8.8556e-22	4.74657e-07	2.89712e+19	0.975006	-1.18004	-1.6226
1702	0.464905	7592.7	did50	Cf	tau	2.11444e-23	5.07245e-06	1.32547e+20	-1.15897	-1.59555	0.971955		1702	0.464767	7590.67	Cf	tau	did50	8.8556e-22	4.74657e-07	2.89712e+19	-1.6226	0.975006	-1.18004
1703	0.464905	7592.7	Cf	did50	tau	2.11444e-23	5.07245e-06	1.32547e+20	-1.59555	-1.15897	0.971955		1703	0.464767	7590.67	tau	Cf	did50	8.8556e-22	4.74657e-07	2.89712e+19	0.975006	-1.6226	-1.18004
1704	0.464905	7592.7	did50	tau	Cf	2.11444e-23	5.07245e-06	1.32547e+20	-1.15897	0.971955	-1.59555		1704	0.464767	7590.67	did50	tau	Cf	8.8556e-22	4.74657e-07	2.89712e+19	-1.18004	0.975006	-1.6226
1705	0.464905	7592.7	tau	did50	Cf	2.11444e-23	5.07245e-06	1.32547e+20	0.971955	-1.15897	-1.59555		1705	0.473829	7653.46	h/D50	tau_sk	tau	0.038212	20.6739	0.00460769	-0.130409	1.70032	-0.359079
1706	0.464905	7592.7	Cf	tau	did50	2.11444e-23	5.07245e-06	1.32547e+20	-1.59555	0.971955	-1.15897		1706	0.473829	7653.46	h/D50	tau	tau_sk	0.038212	20.6739	0.00460769	-0.130409	-0.359079	1.70032
1707	0.464905	7592.7	tau	Cf	did50	2.11444e-23	5.07245e-06	1.32547e+20	0.971955	-1.59555	-1.15897		1707	0.473829	7653.46	tau	h/D50	tau_sk	0.038212	20.6739	0.00460769	-0.359079	-0.130409	1.70032
1708	0.464905	7592.7	tau	did50	h/Kc	1.67714e-07	8971.3	0.0080954	0.971946	-1.15897	0.531849		1708	0.473829	7653.46	tau	tau_sk	h/D50	0.038212	20.6739	0.00460769	-0.359079	1.70032	-0.130409
1709	0.464905	7592.7	h/Kc	tau	did50	1.67714e-07	8971.3	0.0080954	0.531849	0.971946	-1.15897		1709	0.473829	7653.46	tau_sk	h/D50	tau	0.038212	20.6739	0.00460769	1.70032	-0.130409	-0.359079
1710	0.464905	7592.7	tau	h/Kc	did50	1.67714e-07	8971.3	0.0080954	0.971946	0.531849	-1.15897		1710	0.473829	7653.46	tau_sk	tau	h/D50	0.038212	20.6739	0.00460769	1.70032	-0.359079	-0.130409
1711	0.464905	7592.7	did50	h/Kc	tau	1.67714e-07	8971.3	0.0080954	-1.15897	0.531849	0.971946		1711	0.468457	7688.88	h/Kc	S	tau_sk	0.0391892	4.75373	0.368953	0.320089	0.655529	0.813136
1712	0.464905	7592.7	h/Kc	did50	tau	1.67714e-07	8971.3	0.0080954	0.531849	-1.15897	0.971946		1712	0.468457	7688.88	S	h/Kc	tau_sk	0.0391892	4.75373	0.368953	0.655529	0.320089	0.813136
1713	0.464905	7592.7	did50	tau	h/Kc	1.67714e-07	8971.3	0.0080954	-1.15897	0.971946	0.531849		1713	0.468457	7688.88	h/Kc	tau_sk	S	0.0391892	4.75373	0.368953	0.320089	0.813136	0.655529
1714	0.462636	7786.33	tau_sk	tau	tau	64.5244	0.00127597	0.0113693	1.78406	-1.03058	0.731795		1714	0.468457	7688.88	tau_sk	h/Kc	S	0.0391892	4.75373	0.368953	0.813136	0.320089	0.655529
1715	0.462636	7786.33	tau	tau_sk	tau	64.5244	0.00127597	0.0113693	-1.03058	1.78406	0.731795		1715	0.468457	7688.88	S	tau_sk	h/Kc	0.0391892	4.75373	0.368953	0.655529	0.813136	0.320089
1716	0.462636	7786.33	tau	tau	tau_sk	64.5244	0.00127597	0.0113693	-1.03058	0.731795	1.78406		1716	0.468457	7688.88	tau_sk	S	h/Kc	0.0391892	4.75373	0.368953	0.813136	0.655529	0.320089
1717	0.462636	7786.33	tau_sk	tau	tau_sk	61.3573	0.511085	2.98491e-05	2.79907	-0.298787	-1.01501		1717	0.469922	7692.65	S	tau_sk	tau	0.0481088	0.0027811	23.0506	0.120266	1.71186	-0.382207
1718	0.462636	7786.33	tau	tau_sk	tau_sk	61.3573	0.511085	2.98491e-05	-0.298787	2.79907	-1.01501		1718	0.469922	7692.65	tau_sk	S	tau	0.0481088	0.0027811	23.0506	1.71186	0.120266	-0.382207
1719	0.460913	7804.21	h/D50	tau_sk	tau	0.041613	3.08189	0.0160078	-0.0938832	1.45502	-0.263978		1719	0.469922	7692.65	S	tau	tau_sk	0.0481088	0.0027811	23.0506	0.120266	-0.382207	1.71186
1720	0.460913	7804.21	tau_sk	h/D50	tau	0.041613	3.08189	0.0160078	1.45502	-0.0938832	-0.263978		1720	0.469922	7692.65	tau	S	tau_sk	0.0481088	0.0027811	23.0506	-0.382207	0.120266	1.71186
1721	0.460913	7804.21	tau_sk	tau	h/D50	0.041613	3.08189	0.0160078	1.45502	-0.263978	-0.0938832		1721	0.469922	7692.65	tau_sk	tau	S	0.0481088	0.0027811	23.0506	1.71186	-0.382207	0.120266
1722	0.460913	7804.21	h/D50	tau	tau_sk	0.041613	3.08189	0.0160078	-0.0938832	-0.263978	1.45502		1722	0.469922	7692.65	tau	tau_sk	S	0.0481088	0.0027811	23.0506	-0.382207	1.71186	0.120266
1723	0.460913	7804.21	tau	h/D50	tau_sk	0.041613	3.08189	0.0160078	-0.263978	-0.0938832	1.45502		1723	0.456184	7728.46	did50	Rep (u*D)	Rep (u*D)	0.000576075	0.000206204	135440	-0.564088	-5.06155	3.22738
1724	0.460913	7804.21	tau	tau_sk	h/D50	0.041613	3.08189	0.0160078	-0.263978	1.45502	-0.0938832		1724	0.456184	7728.46	Rep (u*D)	did50	Rep (u*D)	0.000576075	0.000206204	135440	-5.06155	-0.564088	3.22738
1725	0.45916	7922.55	tau_sk	h/D50	h/D50	7.29192e+07	1.23585e-12	29.2011	1.52957	-1.4201	1.28723		1725	0.456184	7728.46	Rep (u*D)	Rep (u*D)	did50	0.000576075	0.000206204	135440	-5.06155	3.22738	-0.564088
1726	0.45916	7922.55	h/D50	h/D50	tau_sk	7.29192e+07	1.23585e-12	29.2011	-1.4201	1.28723	1.52957		1726	0.456183	7728.46	Rep (u*D)	did50	did50	0.00211907	2.86936	2.64587	-1.83416	0.143125	-0.707233
1727	0.45916	7922.55	h/D50	tau_sk	h/D50	7.29192e+07	1.23585e-12	29.2011	-1.4201	1.52957	1.28723		1727	0.456183	7728.46	did50	did50	Rep (u*D)	0.00211907	2.86936	2.64587	0.143125	-0.707233	-1.83416
1728	0.45916	7922.54	tau_sk	h/D50	tau_sk	0.00455788	61.8822	0.00933056	-0.0819798	-0.132877	1.61152		1728	0.456183	7728.46	did50	Rep (u*D)	did50	0.00211907	2.86936	2.64587	0.143125	-1.83416	-0.707233
1729	0.45916	7922.54	h/D50	tau_sk	tau_sk	0.00455788	61.8822	0.00933056	-0.132877	-0.0819798	1.61152		1729	0.462171	7779.6	tau_sk	tau	tau	63.0054	0.00374744	0.00410194	1.76607	-1.16467	0.832294
1730	0.45916	7922.54	tau_sk	tau_sk	h/D50	0.00455788	61.8822	0.00933056	-0.0819798	1.61152	-0.132877		1730	0.462171	7779.6	tau	tau_sk	tau	63.0054	0.00374744	0.00410194	-1.16467	1.76607	0.832294
1731	0.456232	7729.19	Rep (u*D)	did50	Rep (u*D)	0.0123219	10.512	0.129933	-5.81813	-0.548424	3.96764		1731	0.462171	7779.6	tau	tau	tau_sk	63.0054	0.00374744	0.00410194	-1.16467	0.832294	1.76607
1732	0.456232	7729.19	did50	Rep (u*D)	Rep (u*D)	0.0123219	10.512	0.129933	-0.548424	-5.81813	3.96764		1732	0.462171	7779.6	tau_sk	tau_sk	tau	83.0747	0.23073	5.05281e-05	2.87508	-1.10901	-0.33237
1733	0.456232	7729.19	Rep (u*D)	Rep (u*D)	did50	0.0123219	10.512	0.129933	-5.81813	3.96764	-0.548424		1733	0.462171	7779.6	tau_sk	tau	tau_sk	83.0747	0.23073	5.05281e-05	2.87508	-0.33237	-1.10901
1734	0.456232	7729.19	did50	did50	Rep (u*D)	0.00407941	1.87385	2.20163	0.250733	-0.799176	-1.85048		1734	0.462171	7779.6	tau	tau_sk	tau_sk	83.0747	0.23073	5.05281e-05	-0.33237	2.87508	-1.10901
1735	0.456232	7729.19	did50	Rep (u*D)	did50	0.00407941	1.87385	2.20163	0.250733	-1.85048	-0.799176		1735	0.451568	7793.18	Rep (u*D)	Rep	Cf	0.124102	0.9557	0.606846	-1.25462	-0.668204	0.317751
1736	0.456232	7729.19	Rep (u*D)	did50	did50	0.00407941	1.87385	2.20163	-1.85048	0.250733	-0.799176		1736	0.451568	7793.18	Rep	Rep (u*D)	Cf	0.124102	0.9557	0.606846	-0.668204	-1.25462	0.317751
1737	0.455997	7930.19	S	tau_sk	did50	0.0492038	0.0070374	4.76665	0.102305	1.49303	-0.18152		1737	0.451568	7793.18	Rep (u*D)	Cf	Rep	0.124102	0.9557	0.606846	-1.25462	0.317751	-0.668204
1738	0.455997	7930.19	tau_sk	S	did50	0.0492038	0.0070374	4.76665	1.49303	0.102305	-0.18152		1738	0.451568	7793.18	Cf	Rep (u*D)	Rep	0.124102	0.9557	0.606846	0.317751	-1.25462	-0.668204
1739	0.455997	7930.19	did50	S	tau_sk	0.0492038	0.0070374	4.76665	-0.18152	0.102305	1.49303		1739	0.451568	7793.18	Rep	Cf	Rep (u*D)	0.124102	0.9557	0.606846	-0.668204	0.317751	-1.25462
1740	0.455997	7930.19	S	did50	tau_sk	0.0492038	0.0070374	4.76665	0.102305	-0.18152	1.49303		1740	0.451568	7793.18	Cf	Rep	Rep (u*D)	0.124102	0.9557	0.606846	0.317751	-0.668204	-1.25462
1741	0.455997	7930.19	did50	tau_sk	S	0.0492038	0.0070374	4.76665	-0.18152	1.49303	0.102305		1741	0.451568	7793.18	h/Kc	Rep (u*D)	Rep	3.59701	0.563083	0.00925789	-0.105914	-1.25456	-0.668211
[truncated: 456 more rows]

## Sheet: Rouse_3parameter
Least squares fit													York fit
[truncated: 451 more rows]

## Sheet: notes
Rouse model search
		Parameters to test
[truncated: 19 more rows]
